# Supplementary material for: Quality analysis and metabolomic profiling of the effects of exogenous abscisic acid on rabbiteye blueberry
Source: Front Plant Sci. 2023 Jul 10;14:1224245. doi: 10.3389/fpls.2023.1224245 (PMC10364122; doi:10.3389/fpls.2023.1224245)
Supplement: Supplementary Table 2 — A total of 575 metabolites were detected and annotated in blueberry fruits at ABA treatment 1000 mg/L vs. 0 mg/L (the control) in negative mode. [file Table_2.xlsx]

## Sheet: A0.vs.C0_neg
ID	Name_des	Formula	Molecular Weight	RT [min]	ChemSpider_Results	mzCloud_Results	mzVault_Results	neg_A01	neg_A02	neg_A03	neg_A04	neg_A05	neg_A06	neg_C01	neg_C02	neg_C03	neg_C04	neg_C05	neg_C06	FC	log2FC	Pvalue	ROC	VIP
Com_214_neg	(÷)-Abscisic acid	C15 H20 O4	264.135	8	Full match	Full match	Full match	7.62578e+08	7.68641e+06	6.88336e+07	8.34281e+08	4.43643e+08	6.31879e+08	2.62759e+06	3.48129e+06	1.81429e+06	3.01876e+06	2.55216e+06	2.12703e+06	175.973	7.45921	0.00201466	1	6.04896
Com_1263_neg	1-(4-Pyridinyl)-4-piperidinecarboxamide	C11 H15 N3 O	205.122	7.997	Full match	No results	No results	2.67265e+07	474407	2.95603e+06	3.09022e+07	1.70881e+07	2.1881e+07	508438	395787	366962	492271	415061	465186	37.8364	5.2417	0.00686153	0.944444	4.1399
Com_1397_neg	Jasmonal	C14 H18 O	202.135	7.995	Full match	No results	No results	1.77175e+07	423882	2.22898e+06	2.51873e+07	1.02445e+07	1.72951e+07	454288	304041	327880	439843	370856	415643	31.6089	4.98226	0.00701286	0.944444	3.92764
Com_767_neg	streptidine	C8 H18 N6 O4	262.14	8.036	Full match	No results	No results	8.04524e+07	653937	7.07348e+06	8.12662e+07	4.46161e+07	6.0671e+07	974909	446307	4.72701e+06	708495	1.97069e+06	394248	29.7922	4.89686	0.0101601	0.888889	4.21879
Com_252_neg	3-Hydroxyvaline	C5 H11 N O3	133.073	1.361	Full match	No results	No results	9.30704e+06	5.04974e+06	1.30287e+07	8.96461e+07	5.1854e+08	7.0912e+07	1.07339e+07	7.13391e+06	6.16568e+06	7.62303e+06	6.89552e+06	6.62654e+06	15.6376	3.96695	0.0781601	0.805556	2.30841
Com_240_neg	Dehydrovomifoliol	C13 H18 O3	222.125	9.029	Full match	No results	No results	1.39951e+08	1.6907e+07	3.07468e+07	1.76548e+08	9.71648e+07	1.26946e+08	1.07227e+07	6.04489e+06	1.04971e+07	8.70376e+06	9.62944e+06	7.42269e+06	11.095	3.47184	0.00215078	1	2.93114
Com_2366_neg	Loxoprofen	C15 H18 O3	246.124	8.231	Full match	No results	No results	1.67165e+06	529434	614246	4.65326e+06	5.81512e+06	1.74249e+06	432332	273162	323656	429416	382196	418218	6.65176	2.73374	0.0121977	1	2.13562
Com_798_neg	Dimedone	C8 H12 O2	140.083	8.725	Full match	No results	No results	1.15161e+07	2.03648e+06	2.76301e+06	1.42672e+07	6.13724e+06	1.43094e+07	1.54635e+06	1.01679e+06	1.09279e+06	2.10606e+06	1.52682e+06	1.29692e+06	5.94353	2.57132	0.00540601	0.972222	2.14864
Com_244_neg	2-methylcitric acid	C7 H10 O7	206.042	1.169	Full match	No results	No results	2.97211e+08	1.41866e+08	5.19856e+08	488434217	3.38996e+08	6.64308e+08	8.2265e+07	4.19854e+07	1.15039e+08	2.86296e+07	3.26029e+07	1.44939e+08	5.50143	2.45981	0.000634772	0.972222	2.42529
Com_1849_neg	1-(4,6-Dimethoxy-1-benzofuran-2-yl)ethanone	C12 H12 O4	220.073	8.703	Full match	No results	No results	7.22143e+06	1.3587e+06	333196	1.08784e+06	1.10331e+06	601087	478538	212694	443029	448761	277167	366400	5.25717	2.39429	0.0381904	0.888889	1.59465
Com_1364_neg	FMNH2	C17 H23 N4 O9 P	458.122	6.313	Full match	No results	No results	9.11999e+06	1.01978e+07	6.1164e+06	1.68842e+07	8.87346e+06	1.32568e+07	3.37962e+06	1.05156e+06	2.75762e+06	1.91463e+06	1.61424e+06	2.05616e+06	5.04536	2.33496	2.58e-05	1	2.22152
Com_375_neg	taxifolin	C15 H12 O7	304.057	8.714	Partial match	No results	Full match	5.63692e+07	7.98828e+07	1.49109e+08	8.55021e+07	1.55887e+08	1.49186e+08	1.36277e+07	4.84317e+07	2.7036e+07	2.49608e+07	8.29694e+06	1.38214e+07	4.96376	2.31143	0.000426528	1	2.33618
Com_1724_neg	Rollicosin	C22 H36 O6	396.25	12.328	Full match	No results	No results	1.16013e+06	1.24171e+06	508343	888037	1.28637e+07	541482	705916	373075	637815	1.02556e+06	505662	304963	4.84195	2.27559	0.146319	0.805556	1.18252
Com_1630_neg	(4-Azidophenyl)methanol	C7 H7 N3 O	149.06	8.733	Full match	No results	No results	2.6072e+06	466862	590523	3.87999e+06	1.69479e+06	2.55489e+06	566807	293090	334596	446108	373282	428791	4.82842	2.27155	0.0115487	0.972222	1.88018
Com_1825_neg	Adenylthiomethylpentose	C11 H15 N5 O3 S	297.088	8.001	Full match	No results	No results	2.07438e+06	1.59451e+06	2.04076e+06	2.3677e+06	1.13312e+07	1.76631e+06	898256	389326	697088	972205	809439	684835	4.75716	2.2501	0.00548752	1	1.76804
Com_571_neg	unnarmicin C	C38 H54 N4 O6	662.401	10.918	Full match	No results	No results	1.08532e+08	2.76379e+07	8.23028e+07	1.03901e+08	7.13826e+07	6.5559e+07	1.81319e+07	1.58174e+07	1.1293e+07	2.66612e+07	1.55169e+07	1.04584e+07	4.69269	2.23042	0.000188404	1	2.05043
Com_700_neg	Sancycline	C21 H22 N2 O7	414.141	7.369	Full match	No results	No results	2.67209e+06	1.79101e+06	1.27809e+06	2.18399e+06	3.62341e+07	1.08637e+06	1.19233e+06	3.54985e+06	760574	3.73293e+06	681305	664181	4.27605	2.09628	0.253881	0.694444	1.0701
Com_1491_neg	Aloeresin A	C28 H28 O11	540.165	10.547	Full match	No results	No results	1.28401e+07	6.54093e+06	8.33607e+06	2.92295e+06	1.93423e+06	3.31166e+06	3.77706e+06	489600	1.33811e+06	634208	878042	1.48766e+06	4.17052	2.06023	0.00576324	0.916667	2.02733
Com_2342_neg	MFCD00210294	C16 H22 O10	374.12	7.72	Full match	No results	No results	4.37472e+06	3.09296e+06	1.69264e+06	4.46806e+06	1.53648e+06	7.35621e+06	1.43849e+06	630914	1.05044e+06	971032	602222	813565	4.08979	2.03203	0.0018564	1	1.77549
Com_2062_neg	Diisodecyl phthalate	C28 H46 O4	446.338	15.112	Full match	No results	No results	3.00172e+06	1.32743e+06	2.50685e+06	6.71484e+06	1.76265e+06	4.05506e+06	973830	964443	788943	356320	740958	952190	4.05481	2.01963	0.00142689	1	1.77787
Com_1661_neg	(2E,4Z)-2,4-Octadienal	C8 H12 O	124.088	8.732	Full match	No results	No results	4.21909e+06	1.00187e+06	1.50408e+06	3.88296e+06	2.53578e+06	4.04738e+06	839688	571516	658435	892402	676470	778515	3.89202	1.96052	0.00305813	1	1.70396
Com_2096_neg	pladienolide B	C30 H48 O8	536.333	9.811	Full match	No results	No results	889668	288538	788806	662142	8.00005e+06	379880	316017	326173	1.15265e+06	525497	263307	289577	3.83162	1.93795	0.204785	0.722222	1.05738
Com_2634_neg	Salicylate	C7 H5 O3	137.024	4.418	Full match	No results	No results	2.59623e+06	2.70718e+06	1.74189e+06	3.36959e+06	2.74408e+06	3.4667e+06	1.31145e+06	366398	861922	642553	577096	628122	3.78929	1.92193	0.000123577	1	1.88155
Com_3995_neg	enniatin B4	C34 H59 N3 O9	653.427	14.954	Full match	No results	No results	1.01309e+06	868249	940097	633530	954072	844891	381255	226331	266948	153607	166989	229495	3.68794	1.88282	3.26e-05	1	1.83723
Com_5858_neg	Ceftazidime	C22 H22 N6 O7 S2	546.097	10.658	Full match	No results	No results	189888	132600	120984	528834	139468	512190	84270	53499.4	60555.6	77121.8	68921.6	98906.3	3.66356	1.87325	0.00876556	1	1.52174
Com_1198_neg	1-Cyclohexenecarboxylic Acid	C7 H10 O2	126.068	8.728	Full match	No results	No results	6.58048e+06	2.12901e+06	2.09283e+06	8.00497e+06	5.0247e+06	7.62497e+06	1.37919e+06	1.05226e+06	1.05702e+06	1.67411e+06	2.14013e+06	1.38659e+06	3.6202	1.85607	0.0038419	0.944444	1.62216
Com_985_neg	(9Z,11E,13S,15Z)-13-Hydroperoxy-9,11,15-octadecatrienoic acid	C18 H30 O4	310.213	12.428	Full match	No results	No results	1.26599e+07	8.06367e+06	1.11718e+07	1.18223e+07	1.89557e+07	1.19478e+07	4.4278e+06	3.53756e+06	2.83761e+06	3.84653e+06	3.76306e+06	2.35625e+06	3.59294	1.84517	6.94e-06	1	1.72218
Com_1419_neg	p-t-Butylbenzaldehyde	C11 H14 O	162.104	8.731	Full match	No results	No results	3.20126e+06	907510	850132	4.55313e+06	1.95616e+06	3.37426e+06	849326	548628	776161	689893	668702	633539	3.56255	1.83291	0.0121903	1	1.5241
Com_231_neg	Phloroglucinol	C6 H6 O3	126.031	1.374	Partial match	Full match	Full match	3.84522e+08	1.0817e+08	3.23607e+08	518571257	2.33521e+08	7.30107e+08	128553133	178797938	1.06946e+08	9.02951e+07	3.72807e+07	1.04541e+08	3.55577	1.83016	0.00647661	0.944444	1.64594
Com_3033_neg	Picrocrocin	C16 H26 O7	330.167	11.57	Full match	No results	No results	987763	816260	1.25125e+06	1.90034e+06	2.70488e+06	1.42758e+06	435101	346137	560925	481642	365781	420241	3.48225	1.80002	0.000596057	1	1.60212
Com_1324_neg	9-Oxononanoic acid	C9 H16 O3	172.109	9.243	Full match	No results	No results	1.32716e+07	1.48019e+07	2.0678e+07	1.10782e+07	9.90478e+06	2.08757e+07	4.92155e+06	4.31837e+06	4.02997e+06	4.34918e+06	5.74238e+06	3.72859e+06	3.34478	1.74191	5.7e-05	1	1.63309
Com_879_neg	2-(Diethoxymethyl)furan	C9 H14 O3	170.094	9.563	Full match	No results	No results	4.39753e+07	3.5965e+07	4.77205e+07	2.78403e+07	2.59969e+07	5.32988e+07	1.77983e+07	9.14698e+06	1.24717e+07	7.92203e+06	1.30128e+07	1.00611e+07	3.33457	1.7375	3.1e-05	1	1.65459
Com_109_neg	Ornithine	C5 H12 N2 O2	132.089	1.433	Full match	Full match	No results	6.22857e+07	3.28367e+07	4.54877e+07	1.65956e+08	3.51901e+08	5.29239e+07	2.15151e+07	3.19563e+07	2.50489e+07	7.56823e+07	4.74656e+07	1.59969e+07	3.26828	1.70853	0.0597216	0.833333	1.33033
Com_5028_neg	Formylkynurenine	C11 H12 N2 O4	236.079	12.164	Full match	No results	No results	431926	334314	502010	574128	505848	850023	195923	126206	135026	178689	166315	191369	3.21908	1.68665	5.01e-05	1	1.55013
Com_2689_neg	Limaprost	C22 H36 O5	380.255	13.284	Full match	No results	No results	593003	442558	566177	971653	3.90303e+06	607016	546716	236271	270438	366253	434882	367991	3.18707	1.67223	0.0471531	0.972222	1.20039
Com_1795_neg	NNK	C10 H13 N3 O2	207.101	9.03	Full match	No results	No results	3.6366e+06	536688	663449	3.79815e+06	2.99306e+06	3.08537e+06	934231	760642	663652	818588	649693	812253	3.17162	1.66522	0.0575172	0.694444	1.3615
Com_446_neg	2-Hydroxy-3-[5-(methylsulfanyl)pentyl]succinate	C10 H16 O5 S	248.071	9.022	Full match	No results	No results	3.98696e+06	2.54058e+06	4.48353e+06	5.29037e+06	4.53774e+06	4.81246e+06	1.39979e+06	960010	1.55959e+06	1.76073e+06	1.03273e+06	1.45577e+06	3.14027	1.65089	1.33e-05	1	1.55103
Com_1417_neg	Haloperidol decanoate	C31 H41 Cl F N O3	529.274	8.709	Full match	No results	No results	1.18414e+06	362466	464992	2.11412e+06	556894	1.10856e+06	379034	241182	273727	346353	296813	345627	3.07594	1.62103	0.0170179	0.972222	1.31731
Com_1310_neg	Isofraxidin	C11 H10 O5	222.052	10.361	Full match	No results	No results	8.24791e+06	1.21209e+06	975191	1.76168e+06	1.35346e+06	898996	597639	1.03415e+06	765765	738064	660982	908647	3.07089	1.61866	0.0712793	0.916667	1.04205
Com_791_neg	Alatrofloxacin	C26 H25 F3 N6 O5	558.186	10.088	Full match	No results	No results	3.53275e+07	1.99684e+07	3.45589e+07	6.23509e+07	1.49815e+07	6.66433e+07	1.37458e+07	7.40191e+06	1.59453e+07	1.28012e+07	1.19048e+07	1.48852e+07	3.04926	1.60846	0.00715643	0.972222	1.3631
Com_2954_neg	Gly-l-pro	C7 H12 N2 O3	172.084	4.839	Full match	No results	No results	2.03043e+06	1.00767e+06	1.58633e+06	1.8587e+06	1.28113e+06	1.90587e+06	662614	450009	447759	709184	432342	512224	3.00863	1.58911	2.18e-05	1	1.48359
Com_1803_neg	(-)-pinellic acid	C18 H34 O5	330.239	10.719	Full match	No results	No results	4.68083e+06	2.99766e+06	3.35154e+06	2.34792e+06	1.16748e+07	2.37316e+06	4.28595e+06	1.35153e+06	907329	825632	707389	1.20857e+06	2.95334	1.56235	0.0116525	0.888889	1.52229
Com_117_neg	Sulfuric acid	H2 O4 S	97.9671	1.126	Full match	No results	No results	1.75811e+08	8.51669e+07	159326688	360374031	4.4778e+08	2.41683e+08	8.34036e+07	7.59133e+07	8.38005e+07	9.76846e+07	7.83184e+07	8.16318e+07	2.93587	1.55379	0.0118132	0.972222	1.30653
Com_2023_neg	NL3600000	C10 H11 N3 O	189.091	8.731	Full match	No results	No results	1.81083e+06	902307	924677	3.07632e+06	1.67004e+06	2.35524e+06	726877	459812	524929	699874	623738	672706	2.89633	1.53423	0.00341127	1	1.34677
Com_4841_neg	medorinone	C9 H8 N2 O	160.063	6.182	Full match	No results	No results	919283	331886	458067	694111	722281	563414	254902	169435	177443	221940	220161	237415	2.87915	1.52564	0.000443002	1	1.38335
Com_2372_neg	2H-1,4-Benzoxazin-3(4H)-one	C8 H7 N O2	149.047	3.118	Full match	No results	No results	3.96682e+06	2.52193e+06	3.37016e+06	3.50666e+06	2.86703e+06	3.00509e+06	1.46884e+06	1.15542e+06	783816	1.25977e+06	904368	1.17481e+06	2.85128	1.51161	6.88e-06	1	1.441
Com_3393_neg	Pyrrolo[1,2-a]pyrazine-3,6(4H,7H)-dione	C7 H6 N2 O2	150.042	7.122	Full match	No results	No results	1.73826e+06	1.04302e+06	1.38399e+06	1.89047e+06	1.39071e+06	1.4561e+06	690310	485173	425391	674849	451227	404378	2.84305	1.50744	1.01e-05	1	1.42718
Com_1615_neg	IN00150	C18 H16 O6	328.093	7.529	Full match	No results	No results	5.80626e+06	2.0242e+06	2.28788e+06	2.97575e+06	1.45834e+07	1.97467e+06	3.19341e+06	2.83526e+06	1.09463e+06	1.64464e+06	671274	992100	2.84262	1.50722	0.0555186	0.805556	1.2441
Com_2153_neg	3-hexaprenyl-4,5-dihydroxybenzoic acid	C37 H54 O4	562.403	1.148	Full match	No results	No results	1.35913e+06	2.546e+06	1.76388e+06	6.40744e+06	2.74865e+06	4.35695e+06	1.76649e+06	1.01206e+06	765646	1.22352e+06	990070	1.01883e+06	2.83063	1.50112	0.00802039	0.944444	1.27594
Com_1448_neg	5-Nitro-7,11-diazatricyclo[7.3.1.0~2,7~]trideca-2,4-dien-6-one	C11 H13 N3 O3	235.096	10.171	Full match	No results	No results	1.38503e+07	6.14075e+06	1.83768e+07	6.96832e+06	5.76446e+06	7.66604e+06	4.93361e+06	2.52242e+06	5.50243e+06	2.67182e+06	1.16299e+06	4.17082e+06	2.80321	1.48708	0.00664765	1	1.44205
Com_4795_neg	5-Methylangelicin	C12 H8 O3	200.048	5.06	Full match	No results	No results	720788	580001	339346	605084	374562	610237	247297	145410	148045	205427	199548	209908	2.79502	1.48286	9.04e-05	1	1.37604
Com_2395_neg	Dihomo-gamma-linolenic acid	C20 H34 O2	306.254	14.612	Full match	No results	No results	2.52458e+06	2.5682e+06	1.92734e+06	4.19824e+06	2.46033e+06	4.48734e+06	792019	2.82753e+06	774310	921140	432986	762653	2.79021	1.48037	0.00391689	0.888889	1.59338
Com_1083_neg	Reduced-(S)-usnate	C18 H18 O7	346.104	7.532	Full match	No results	No results	1.1879e+07	5.28031e+06	6.73769e+06	7.13113e+06	3.61606e+07	5.54499e+06	8.20773e+06	6.34361e+06	2.68931e+06	4.33232e+06	1.97311e+06	2.56466e+06	2.78559	1.47798	0.0428269	0.833333	1.22072
Com_904_neg	Paeonilactone C	C17 H18 O6	318.109	8.6	Full match	No results	No results	1.25297e+07	1.1552e+07	1.09441e+07	1.06576e+07	5.29899e+07	7.68091e+06	8.67531e+06	9.21588e+06	4.91548e+06	8.40932e+06	3.46479e+06	3.83079e+06	2.76162	1.46551	0.0327095	0.916667	1.14485
Com_2503_neg	3-Aminotyrosine	C9 H12 N2 O3	196.084	2.869	Full match	No results	No results	3.66479e+06	2.82804e+06	3.30503e+06	3.30378e+06	3.54188e+06	3.37366e+06	1.56771e+06	1.06607e+06	1.14828e+06	1.24369e+06	1.09516e+06	1.16131e+06	2.74877	1.45879	2.1e-07	1	1.3841
Com_3788_neg	1-(beta-D-Ribofuranosyl)-1,2-dihydropyrimidine	C9 H14 N2 O4	214.094	7.183	Full match	No results	No results	950253	418995	790233	969255	796985	1.1333e+06	352416	246506	294797	337350	323139	306225	2.71927	1.44322	0.000581167	1	1.31044
Com_5993_neg	TH9185000	C8 H6 N2 O	146.048	10.369	Full match	No results	No results	107752	74220.2	95752.1	168437	147308	443400	73160.5	52814	58936.2	76393.2	55465.4	66946.1	2.70219	1.43413	0.0240204	0.972222	1.12746
Com_2531_neg	gaboxadol	C6 H8 N2 O2	140.058	4.239	Full match	No results	No results	3.69982e+06	2.32988e+06	3.62232e+06	4.45154e+06	2.9739e+06	4.1668e+06	1.55197e+06	1.33115e+06	1.03372e+06	1.166e+06	1.63803e+06	1.18047e+06	2.68869	1.4269	1.75e-05	1	1.3313
Com_4242_neg	2-Oxotetrahydrofuran-3,4-diyl diacetate	C8 H10 O6	202.047	10.385	Full match	No results	No results	625837	442402	696067	994551	1.0013e+06	802997	317723	204046	280206	284311	346289	274028	2.67382	1.4189	0.000177119	1	1.30323
Com_5560_neg	Kinobscurinone	C18 H10 O5	306.054	14.544	Full match	No results	No results	268138	52706.2	223355	322091	174362	395697	99076.8	61391.3	68390.5	66014.5	117026	128300	2.65892	1.41084	0.0326953	0.833333	1.21204
Com_4935_neg	Anthraquinone	C14 H8 O2	208.053	14.907	Full match	No results	No results	213277	76399.4	263201	249903	275079	283998	86407.5	78318.9	110560	124569	51477.6	63087.9	2.64736	1.40456	0.00449884	0.888889	1.28553
Com_4725_neg	(Z)-2-Butene-1,2,3-tricarboxylic acid	C7 H8 O6	188.031	15.897	Full match	No results	No results	795476	299833	356390	644977	358061	514610	204853	136996	136272	248533	191801	213324	2.62361	1.39155	0.000900258	1	1.26001
Com_4588_neg	YR0513000	C5 H6 N2 O3	142.037	0.627	Full match	No results	No results	914542	394623	710830	978635	703747	922032	308123	295250	260424	339660	306640	253671	2.62189	1.39061	0.000666863	1	1.261
Com_1353_neg	Tyrosol	C8 H10 O2	138.068	8.486	Full match	No results	No results	2.81072e+06	2.21341e+06	1.89163e+06	2.56559e+06	2.2198e+07	2.00266e+06	2.16607e+06	2.95946e+06	1.59331e+06	2.26266e+06	1.69655e+06	2.41245e+06	2.57301	1.36346	0.309903	0.638889	0.647027
Com_5803_neg	pemoline	C9 H8 N2 O2	176.059	8.122	Full match	No results	No results	305231	138798	458596	311486	208416	250209	102694	63802.1	77782	116896	85719.5	214265	2.53001	1.33914	0.00276034	0.944444	1.28465
Com_1814_neg	N,N'-1,4-Phenylenebis(1,1-diphenylmethanimine)	C32 H24 N2	436.193	11.024	Full match	No results	No results	5.17687e+06	2.39611e+06	522314	3.20955e+06	3.38474e+06	2.78963e+06	1.08715e+06	648854	1.43059e+06	1.48131e+06	1.85102e+06	486323	2.50231	1.32326	0.0618703	0.861111	1.1541
Com_2839_neg	2-((4-Nitrophenoxy)methyl)oxirane	C9 H9 N O4	195.052	1.894	Full match	No results	No results	3.53597e+06	1.28644e+06	1.86031e+06	2.34309e+06	2.04664e+06	3.12975e+06	978457	547655	1.00712e+06	902951	1.28496e+06	978501	2.49177	1.31717	0.000989445	1	1.21064
Com_1954_neg	Auriculoside	C22 H26 O10	450.153	6.408	Full match	No results	No results	5.49972e+06	6.06781e+06	2.17917e+06	6.40552e+06	5.46623e+06	3.42699e+06	3.07917e+06	1.24111e+06	1.77034e+06	1.09001e+06	2.03273e+06	2.56033e+06	2.46698	1.30274	0.00354436	0.944444	1.22907
Com_5123_neg	Erythorbic acid	C6 H8 O6	176.031	15.885	Full match	No results	No results	468891	257962	571577	457509	421408	435949	244443	104965	185206	171427	110569	253474	2.44214	1.28815	0.000867391	1	1.25374
Com_1978_neg	MFCD00078645	C5 H8 Cl N5	173.047	10.742	Full match	No results	No results	3.40819e+06	2.3575e+06	2.8474e+06	2.67855e+06	2.19134e+06	2.86319e+06	737822	801752	1.00181e+06	2.26548e+06	940942	969148	2.43357	1.28307	0.00124406	0.972222	1.31486
Com_671_neg	Mitobronitol	C6 H12 Br2 O4	305.911	1.878	Full match	No results	No results	8.65803e+06	6.16881e+06	1.09114e+07	1.41378e+07	8.43439e+06	1.5234e+07	5.4441e+06	3.11195e+06	3.94331e+06	3.96396e+06	5.22304e+06	4.50497e+06	2.42617	1.27868	0.000721284	1	1.1635
Com_1952_neg	(3S,6R)-3,6-Dihydroxy-10-methylundecanoic acid	C12 H24 O4	232.166	9.84	Full match	No results	No results	3.87609e+06	2.33529e+06	1.26133e+06	2.44708e+06	9.43552e+06	1.85125e+06	1.66957e+06	1.91856e+06	1.23132e+06	1.73175e+06	1.25127e+06	976473	2.41562	1.27239	0.0648483	0.888889	0.936296
Com_1877_neg	10-Undecyn-1-yl benzenesulfonate	C17 H24 O3 S	308.144	8.059	Full match	No results	No results	6.95458e+06	6.10686e+06	2.71691e+06	4.46667e+06	4.55375e+06	5.33964e+06	3.50543e+06	877419	953242	2.05068e+06	3.272e+06	1.8774e+06	2.40412	1.26551	0.00807723	0.944444	1.31903
Com_426_neg	DL-Arginine	C6 H14 N4 O2	174.111	1.3	Full match	No results	No results	8.39654e+06	3.48534e+06	5.87505e+06	3.29789e+07	4.7432e+07	7.03594e+06	7.32589e+06	4.50444e+06	4.26535e+06	1.15014e+07	1.15741e+07	4.69769e+06	2.39815	1.26192	0.305546	0.611111	0.94684
Com_4107_neg	(5-Chloro-1-pentyn-1-yl)(triethyl)silane	C11 H21 Cl Si	216.11	8.831	Full match	No results	No results	645228	321512	669684	1.1474e+06	639441	979022	428667	224788	243670	352204	259472	327857	2.3969	1.26117	0.00411325	0.916667	1.14199
Com_5677_neg	Sulopenem etzadroxil	C19 H27 N O7 S3	477.095	6.419	Full match	No results	No results	149797	125820	145874	178256	526556	233808	104399	78918.8	79378.7	102315	93723.6	111884	2.38357	1.25312	0.0164603	1	1.02005
Com_584_neg	3-Hydroxyanthranilic acid	C7 H7 N O3	153.042	10.612	Partial match	Full match	No results	41668497	3.69261e+07	4.97221e+07	5.98533e+07	1.03948e+08	7.0789e+07	4.40436e+07	2.56e+07	1.43254e+07	2.54898e+07	2.20631e+07	2.4079e+07	2.3323	1.22175	0.0027897	0.944444	1.15042
Com_3565_neg	4-Nitro-o-anisidine	C7 H8 N2 O3	168.053	7.276	Full match	No results	No results	803350	560898	882049	1.01344e+06	901780	879491	519329	276899	275125	368371	385794	375084	2.29074	1.19581	7.25e-05	1	1.13713
Com_4603_neg	2-Aminooxazole	C3 H4 N2 O	84.0321	0.566	Full match	No results	No results	493501	335699	496632	683822	422741	743953	312038	196224	183983	224925	220109	250668	2.28852	1.19442	0.000405899	1	1.09735
Com_3358_neg	Betamipron	C10 H11 N O3	193.073	11.257	Full match	No results	No results	1.39003e+06	613984	961424	1.47737e+06	906807	866697	502322	385308	479657	480420	419488	457616	2.28137	1.1899	0.0013734	1	1.06766
Com_5889_neg	1-Vinyl-2-pyrrolidone	C6 H9 N O	111.068	5.685	Full match	No results	No results	259546	210332	243265	237139	276866	358688	139666	90118.5	90125.7	126566	125354	132205	2.25249	1.17152	2.27e-05	1	1.10445
Com_5057_neg	1-EBIO	C9 H10 N2 O	162.079	4.975	Full match	No results	No results	427831	186485	268630	352796	391662	269026	157100	108947	113014	154899	148309	162197	2.24571	1.16717	0.000635935	1	1.06865
Com_2001_neg	Ethyl 1-(4-ethoxyphenyl)-4-hydroxy-1H-pyrazole-3-carboxylate	C14 H16 N2 O4	276.111	8.159	Full match	No results	No results	991027	652018	853271	1.00134e+06	2.56199e+06	1.5231e+06	607973	559606	533790	591129	529956	562338	2.24024	1.16365	0.0161049	1	0.969389
Com_1226_neg	Pyridoxal	C8 H9 N O3	167.057	11.576	Full match	No results	No results	1.05344e+07	6.98979e+06	8.35954e+06	7.79364e+06	1.88499e+07	7.25399e+06	8.545e+06	4.53646e+06	1.91997e+06	5.88478e+06	2.72321e+06	3.10642e+06	2.23767	1.162	0.0111914	0.888889	1.17729
Com_5258_neg	2-pyridone	C5 H5 N O	95.0369	4.543	Full match	No results	No results	386939	297301	385756	555028	450905	358118	204254	129646	117048	172239	174548	302402	2.21249	1.14567	0.000852761	0.972222	1.12034
Com_520_neg	Queen Bee Acid	C10 H18 O3	186.125	8.605	Full match	No results	No results	3.13205e+07	1.9331e+07	1.23556e+07	2.45446e+07	1.52202e+08	2.41878e+07	2.43536e+07	2.23713e+07	1.55249e+07	24909594	1.25889e+07	1.99162e+07	2.20568	1.14122	0.293005	0.638889	0.685182
Com_736_neg	TI1940000	C14 H18 O4	250.119	9.247	Invalid mass	No results	No results	1.52244e+07	2.40233e+07	1.00106e+07	1.17205e+07	8.19374e+07	9.13727e+06	1.51988e+07	1.5283e+07	1.01796e+07	1.48712e+07	3.76615e+06	9.91928e+06	2.19673	1.13536	0.219171	0.638889	0.723599
Com_3204_neg	NS1800000	C8 H9 N O4	183.052	2.159	Full match	No results	No results	2.19605e+06	1.16031e+06	1.45144e+06	1.51527e+06	1.70197e+06	1.68219e+06	697894	807479	617916	744060	602000	975013	2.18417	1.12708	4.92e-05	1	1.05553
Com_2209_neg	3,N(4)-ethenocytosine	C6 H5 N3 O	135.044	7.531	Full match	No results	No results	2.94007e+06	1.72171e+06	2.50122e+06	2.19099e+06	7.14455e+06	2.00308e+06	2.11877e+06	1.83829e+06	877803	1.69656e+06	948278	1.00742e+06	2.17997	1.12431	0.0225139	0.916667	0.977688
Com_3633_neg	3-(6-hydroxyindol-3-yl)lactic acid	C11 H11 N O4	221.068	2.312	Full match	No results	No results	742492	779141	980742	1.022e+06	639316	747859	471188	249223	294129	370445	381475	492752	2.17401	1.12036	0.000205046	1	1.08395
Com_3165_neg	4-Methoxyaniline	C7 H9 N O	123.068	3.411	Full match	No results	No results	1.37572e+06	1.07168e+06	1.0841e+06	1.55687e+06	1.11793e+06	921073	788084	348864	359043	522459	467447	794666	2.1726	1.11943	0.00146021	1	1.1088
Com_4234_neg	Diethoxymethylsilane	C5 H14 O2 Si	134.077	2.781	Full match	No results	No results	570032	422553	513082	649053	1.19221e+06	551704	319837	253763	210878	373947	340773	299662	2.16728	1.11589	0.00239654	1	0.997744
Com_3951_neg	AM9627000	C8 H7 N O3	165.042	13.6	Full match	No results	No results	1.06654e+06	611604	1.23401e+06	1.08377e+06	995780	1.22502e+06	810640	424979	336133	401336	361067	542414	2.16116	1.1118	0.00100532	0.972222	1.08003
Com_3091_neg	Pyridine	C5 H5 N	79.0418	6.641	Full match	No results	No results	959127	716601	545759	1.7676e+06	2.58665e+06	914797	617275	405450	478525	886498	687025	401070	2.15503	1.10771	0.0402734	0.888889	0.945068
Com_1152_neg	chaetomugilin G	C24 H29 Cl O7	464.161	9.212	Full match	No results	No results	2.94124e+06	1.89731e+06	2.32316e+06	1.97598e+06	448209	2.97019e+06	423369	292923	269789	916258	2.29678e+06	1.63806e+06	2.15105	1.10504	0.073023	0.861111	1.34157
Com_4587_neg	5-Hydroxytryptophol	C10 H11 N O2	177.078	4.621	Full match	No results	No results	713516	453740	603956	957656	888460	1.06775e+06	394231	266381	342862	378293	348749	450033	2.14858	1.10338	0.00125927	1	1.0092
Com_2816_neg	3-deoxy-D-manno-2-octulosonic acid	C8 H14 O8	238.068	13.191	Full match	No results	No results	964684	830204	878780	2.85682e+06	1.07432e+06	1.25809e+06	912334	476780	395112	555136	681769	641152	2.14699	1.10232	0.0127672	0.944444	0.960345
Com_5119_neg	2,5-Dihydropyridine	C5 H7 N	81.0575	11.795	Full match	No results	No results	616797	339140	418575	499756	673351	354985	324834	155675	180337	207739	303227	180774	2.14597	1.10163	0.00108295	1	1.04686
Com_816_neg	MFCD00273002	C33 H56 O6	548.41	0.529	Full match	No results	No results	3.41541e+07	4.22369e+07	9.3135e+06	1.534e+07	11447067	1.11927e+07	1.29736e+07	7.21568e+06	1.18252e+07	8.87592e+06	6.81915e+06	1.02615e+07	2.13355	1.09326	0.0688154	0.805556	0.881695
Com_3241_neg	mephenesin	C10 H14 O3	182.094	10.934	Full match	No results	No results	998277	781231	1.04175e+06	1.02842e+06	970873	876808	344641	347244	495035	654006	461452	375006	2.12796	1.08947	0.000235409	1	1.06272
Com_3076_neg	Methyldopa	C10 H13 N O4	211.084	6.422	Full match	No results	No results	1.61744e+06	855948	1.69915e+06	1.80426e+06	1.5997e+06	1.68799e+06	1.11501e+06	625174	502574	785185	976364	349768	2.12777	1.08934	0.00456994	0.944444	1.09564
Com_160_neg	Salicylic acid	C7 H6 O3	138.031	5.816	Full match	Full match	Full match	5.29931e+08	2.89566e+08	273244922	4.37949e+08	1011325939	2.90748e+08	2.90183e+08	2.29555e+08	1.66405e+08	3.66447e+08	1.26332e+08	1.55141e+08	2.12341	1.08638	0.0252816	0.861111	0.97457
Com_254_neg	L-Proline	C5 H9 N O2	115.063	1.435	Full match	No results	No results	140249590	1.01233e+08	6.47274e+07	2.07818e+08	5.17013e+08	1.31341e+08	8.06831e+07	7.02622e+07	9.07098e+07	1.44454e+08	9.63953e+07	6.52876e+07	2.12194	1.08538	0.122013	0.75	0.817612
Com_1861_neg	Buclizine	C28 H33 Cl N2	432.235	9.22	Full match	No results	No results	1.15264e+06	813418	609262	1.07897e+06	1.06837e+07	1.08363e+06	1.46545e+06	1.00782e+06	1.87554e+06	866121	693255	1.38414e+06	2.11477	1.0805	0.686754	0.555556	0.519793
Com_3813_neg	4-Cyano-DL-Phenylalanine	C10 H10 N2 O2	190.074	4.552	Full match	No results	No results	820952	425393	818640	720573	1.00182e+06	716121	432417	280790	258178	406292	366182	389777	2.11071	1.07773	0.000692317	0.972222	0.998842
Com_4259_neg	Phosphoarginine	C6 H15 N4 O5 P	254.078	2.371	Full match	No results	No results	745055	561970	802809	1.08046e+06	634106	810592	536036	245717	283237	385700	361860	384954	2.10921	1.0767	0.000425354	1	1.02681
Com_467_neg	3-[1,2-Diphenyl-2-(phenylsulfanyl)ethyl]-1H-indole	C28 H23 N S	405.155	7.533	Full match	No results	No results	1.69207e+07	1.17769e+07	1.98747e+07	1.20117e+07	5.69311e+07	1.58847e+07	1.22156e+07	9.54695e+06	1.00087e+07	1.216e+07	8.48808e+06	1.10224e+07	2.10271	1.07225	0.058345	0.888889	0.793915
Com_3419_neg	N-(3-Carboxypropanoyl)-5-hydroxynorvaline	C9 H15 N O6	233.089	13.969	Full match	No results	No results	1.72755e+06	887078	1.62642e+06	2.40952e+06	1.92127e+06	1.92203e+06	889605	745361	733581	1.09638e+06	798996	766682	2.086	1.06074	0.00245444	0.944444	0.966251
Com_4615_neg	Metirosine	C10 H13 N O3	195.089	4.542	Full match	No results	No results	1.0438e+06	510634	475754	677633	417080	378127	376895	221378	199866	294108	298049	309369	2.06101	1.04335	0.00484091	1	0.927475
Com_1676_neg	Chartreusin	C32 H32 O14	640.178	10.6	Full match	No results	No results	2.78864e+06	1.67956e+06	2.39328e+06	9.09001e+06	4.66412e+06	1.18248e+07	2.07351e+06	4.6354e+06	3.1529e+06	3.62495e+06	1.33434e+06	958675	2.05582	1.03972	0.15977	0.722222	0.921049
Com_1113_neg	3-(2,6-dihydroxyphenyl)-4-hydroxy-6-methyl-3H-2-benzofuran-1-one	C15 H12 O5	272.067	10.191	No results	No results	Invalid mass	2.22074e+07	1.90388e+07	2.52881e+07	1.72676e+07	3.40837e+07	1.65401e+07	1.91661e+07	2.4284e+07	5.90061e+06	7.38273e+06	4.05584e+06	4.61182e+06	2.0554	1.03942	0.0273034	0.805556	1.27368
Com_5020_neg	2-[(beta-D-Mannopyranosyloxy)methyl]acrylonitrile	C10 H15 N O6	245.089	3.253	Full match	No results	No results	613707	509575	400245	403619	416287	404922	236722	233122	188002	218529	229391	232100	2.05428	1.03863	3.67e-05	1	0.979374
Com_3835_neg	Aniline	C6 H7 N	93.0574	5.019	Full match	No results	No results	1.35991e+06	475395	729023	1.00681e+06	966844	1.09003e+06	440262	518565	217002	661765	541786	383226	2.03721	1.02659	0.00833439	0.916667	0.98429
Com_2572_neg	Diethyl diallylmalonate	C13 H20 O4	240.135	11.569	Full match	No results	No results	4.41277e+06	2.60286e+06	4.15183e+06	5.50145e+06	4.0078e+06	3.15231e+06	1.83056e+06	1.50693e+06	2.1143e+06	2.66264e+06	1.91671e+06	1.6897e+06	2.03305	1.02364	0.000513183	0.972222	0.948005
Com_3225_neg	Ethyl 1H-imidazol-2-ylacetate	C7 H10 N2 O2	154.073	7.879	Invalid mass	No results	No results	1.03719e+06	598501	2.19875e+06	987951	1.01211e+06	1.53295e+06	1.19557e+06	358305	615559	475355	545985	442154	2.02797	1.02003	0.0173864	0.861111	0.962282
Com_4471_neg	PB2100000	C3 H8 O3 S	124.019	11.781	Full match	No results	No results	360937	677433	321137	364646	363577	366569	212244	169430	141461	202142	264209	227122	2.01733	1.01245	0.000756642	1	0.976997
Com_654_neg	Bonducellpin D	C22 H28 O7	404.182	9.478	Full match	No results	No results	2.675e+07	2.68996e+07	4.31753e+07	2.35348e+07	1.00591e+08	2.36847e+07	2.85915e+07	2.67446e+07	1.62449e+07	2.6726e+07	1.12586e+07	1.23034e+07	2.00736	1.0053	0.064415	0.777778	0.822926
Com_5855_neg	Arbutin	C12 H16 O7	272.088	6.179	Full match	No results	No results	350967	189270	248839	225489	210527	226263	143832	96403.4	100124	125233	124228	133964	2.00523	1.00377	0.000120329	1	0.932858
Com_242_neg	5,5-Dimethyl-4-(3-oxobutyl)dihydro-2(3H)-furanone	C10 H16 O3	184.109	7.951	Full match	No results	No results	1.28916e+08	8.18828e+07	5.01219e+07	1.03246e+08	5.46049e+08	8.30688e+07	1.05689e+08	1.08269e+08	6.3187e+07	1.01815e+08	5.62299e+07	6.0459e+07	2.00401	1.00289	0.324445	0.611111	0.623885
Com_3482_neg	(4E,5Z)-3-Hydroxy-4,5-bis(hydroxyimino)-2-pyrrolidinone	C4 H5 N3 O4	159.029	3.313	Full match	No results	No results	912664	680982	972147	932970	945079	1.49517e+06	500598	469873	375797	622336	545123	459822	1.99728	0.998038	0.000447269	1	0.918167
Com_3343_neg	Vinorelbine	C45 H54 N4 O8	778.395	1.138	Full match	No results	No results	227236	168698	2.06759e+06	262172	251736	230327	271576	207378	223008	345878	293885	264499	1.99708	0.997892	0.601323	0.611111	0.353685
Com_1968_neg	L-(-)-Serine	C3 H7 N O3	105.042	2.362	Full match	No results	No results	3.62957e+06	4.51488e+06	4933459	4.33281e+06	9.22531e+06	5.95089e+06	2.68245e+06	2.41504e+06	2.64742e+06	4.12832e+06	2.45472e+06	2.07401e+06	1.98677	0.990425	0.00285024	0.972222	0.900356
Com_723_neg	Ethyl maltol	C7 H8 O3	140.047	7.942	Full match	No results	No results	5.60369e+06	4.23744e+06	4.55214e+06	8.17679e+06	5.198e+06	6.02194e+06	4.03989e+06	2.14381e+06	2.10873e+06	3.29008e+06	2.47133e+06	2.98138e+06	1.98354	0.988077	0.000678894	1	0.940389
Com_334_neg	1,1'-(5-Phenyl-3-cyclopentene-1,3-diyl)bis(4-chlorobenzene)	C23 H18 Cl2	364.078	7.983	Full match	No results	No results	1.79985e+06	749009	1.50386e+06	874001	805575	1.57828e+06	750276	463930	513916	701280	771956	501796	1.97415	0.981231	0.00833064	0.944444	0.868352
Com_1944_neg	MFCD00041564	C11 H22 O3	202.156	12.289	Full match	No results	No results	1.49652e+06	910048	896737	1.53386e+06	1.4862e+06	953502	653279	489854	630587	669918	652537	600758	1.96835	0.976988	0.00109528	1	0.887675
Com_3937_neg	3'-Hydroxycotinine, Cis-	C10 H12 N2 O2	192.089	5.866	Full match	No results	No results	524324	388197	489934	1.57546e+06	683726	1.18052e+06	530962	338208	294944	401422	432993	469206	1.96219	0.972462	0.0535996	0.833333	0.817267
Com_328_neg	13-KODE	C18 H30 O3	294.218	13.082	Full match	No results	No results	3.67288e+07	2.70549e+07	4.34511e+07	4.35365e+07	5.57366e+07	4.66201e+07	3.5448e+07	1.75432e+07	17325183	2.16738e+07	2.20745e+07	1.59234e+07	1.94732	0.961487	0.00147303	0.972222	0.933511
Com_1107_neg	Kynurenic acid	C10 H7 N O3	189.042	8.533	Full match	No results	No results	1.71665e+06	1.24105e+06	1.22544e+06	1.16267e+06	1.47861e+06	1.05468e+06	683807	557223	725986	762230	661268	667404	1.94166	0.957291	4.55e-05	1	0.895084
Com_5231_neg	moniliformin	C4 H2 O3	98	5.077	Full match	No results	No results	616579	281910	458521	424247	655025	548542	244613	211226	192948	317047	214249	366213	1.93031	0.948829	0.00283225	0.944444	0.884939
Com_3976_neg	(+)-Flesinoxan	C22 H26 F N3 O4	415.191	14.788	Full match	No results	No results	143535	53620.2	40020.7	128062	39807	226105	111562	33501.5	33973.2	30613.9	91202.3	27150.7	1.92422	0.944271	0.15847	0.833333	0.892805
Com_3929_neg	4-Hydroxy-2-oxoglutaric acid	C5 H6 O6	162.016	2.705	Full match	No results	No results	819748	742369	618233	812817	753744	560124	476231	240912	465128	315494	399892	345504	1.92007	0.941161	0.000573487	1	0.911572
Com_2300_neg	Decuroside III	C26 H34 O14	570.193	10.475	Full match	No results	No results	1.78861e+06	1.20745e+06	1.41947e+06	3.79548e+06	6.35549e+06	1.49376e+06	2.0228e+06	1.29219e+06	1.6225e+06	1.24958e+06	1.19297e+06	1.01156e+06	1.91385	0.936474	0.146178	0.75	0.736624
Com_377_neg	Dithizone	C13 H12 N4 S	256.078	1.578	Full match	No results	No results	1.34007e+07	8.30991e+06	1.40347e+07	1.29558e+07	9.85907e+06	4.78334e+07	1.21752e+07	6.75517e+06	8.93304e+06	1.09044e+07	8.35649e+06	8.48845e+06	1.91311	0.935922	0.126354	0.805556	0.667106
Com_4735_neg	tert-Butyl (2-oxooxetan-3-yl)carbamate	C8 H13 N O4	187.084	8.185	Full match	No results	No results	544474	304094	370057	409736	323895	478973	216866	179697	219262	269291	189038	198025	1.91108	0.934385	0.000313449	1	0.862677
Com_3787_neg	2,3,6-Pyridinetriol	C5 H5 N O3	127.026	15.062	Full match	No results	No results	689803	317006	460029	585816	454381	470005	202901	180663	141328	356237	489600	187659	1.91033	0.933824	0.0119303	0.861111	0.975246
Com_5357_neg	4-aminobenzoylglutamic acid	C12 H14 N2 O5	266.089	4.889	Full match	No results	No results	423758	260555	424540	362228	386210	335869	221394	150666	149998	206413	203167	219678	1.90492	0.929728	0.000113866	1	0.875258
Com_5383_neg	3-Isopropyl-2,5-piperazinedione	C7 H12 N2 O2	156.089	9.278	Full match	No results	No results	592365	315771	335074	504185	294720	353551	369035	185795	158369	176018	177748	191298	1.90395	0.928995	0.00321469	0.888889	0.890391
Com_613_neg	Reduced Glutathione	C10 H17 N3 O6 S	307.083	7.512	Full match	No results	No results	8.87104e+06	7.18983e+06	1.12296e+07	6.57902e+06	3.35447e+07	7.46957e+06	5.41073e+06	6.31123e+06	6.91643e+06	8.44202e+06	4.81398e+06	7.4666e+06	1.90249	0.927887	0.12482	0.833333	0.634665
Com_5859_neg	5,6-dihydroxy-2-indolecarboxylic acid	C9 H7 N O4	193.037	11.933	Full match	No results	No results	292381	131939	167422	208054	206195	229890	128533	83654.9	88964.5	114523	110822	123176	1.90231	0.927754	0.00124258	1	0.855564
Com_3199_neg	Pivagabine	C9 H17 N O3	187.12	7.902	Full match	No results	No results	1.03046e+06	587370	1.03054e+06	773378	1.04738e+06	719848	445919	519229	379775	484658	694708	234913	1.8806	0.911195	0.00520738	0.972222	0.89625
Com_5465_neg	Fumarate dianion	C4 H2 O4	113.995	15.254	Invalid mass	No results	No results	370056	186286	557024	330755	307165	461997	257935	163674	146271	259414	148936	202121	1.87829	0.909418	0.0107359	0.916667	0.822412
Com_4310_neg	metharbital	C9 H14 N2 O3	198.1	5.642	Full match	No results	No results	613731	623472	486482	827015	905136	782223	377046	272756	214252	292695	586480	516681	1.87532	0.907139	0.0065477	0.944444	0.910228
Com_136_neg	Benzyl sulfone	C14 H14 O2 S	246.073	1.427	Full match	No results	No results	2.49512e+08	2.62379e+08	312749394	3.33886e+08	1229084158	2.85915e+08	3.44678e+08	1.83897e+08	1.28917e+08	532133007	1.26218e+08	1.16475e+08	1.86657	0.900392	0.119358	0.722222	0.853679
Com_1188_neg	(-)-Podophyllotoxin	C22 H22 O8	414.13	12.124	Full match	No results	No results	1.032e+06	710369	941800	1.09692e+06	1.06381e+06	1.01787e+06	617123	387188	439212	564507	532887	603328	1.8646	0.898869	0.000104735	1	0.852656
Com_1217_neg	lixivaptan	C27 H21 Cl F N3 O2	473.13	8.893	Full match	No results	No results	6.97279e+06	2.35333e+06	5.64428e+06	3.61861e+06	680785	9.24411e+06	923027	2.12323e+06	2.36232e+06	6.3945e+06	2.74262e+06	756317	1.86341	0.897944	0.26699	0.694444	0.82526
Com_2047_neg	Sesartemin	C23 H26 O8	430.161	11.855	Full match	No results	No results	973897	630599	835558	953949	954499	972921	570066	338112	382333	527014	492733	547135	1.86233	0.897112	0.000256977	1	0.855579
Com_438_neg	MFCD00004231	C8 H8 O5	184.036	7.942	Full match	No results	No results	1.08574e+07	8.15136e+06	8.57698e+06	1.57667e+07	1.30648e+07	1.14445e+07	8.09346e+06	5.05524e+06	4.74769e+06	6.93098e+06	5.85978e+06	5.79197e+06	1.86029	0.895527	0.000975953	1	0.840185
Com_2819_neg	(+)-7-deoxy-trans-dihydronarciclasine	C14 H15 N O6	293.089	10.742	Full match	No results	No results	649509	243569	374674	439250	368302	456640	206556	135698	156720	468326	189670	204796	1.85931	0.894766	0.0136476	0.861111	0.913274
Com_4139_neg	L-Lombricine	C6 H15 N4 O6 P	270.073	3.224	Full match	No results	No results	704720	465069	523673	596668	625996	584325	351178	333667	250041	308803	313306	332230	1.85285	0.889747	1.39e-05	1	0.833697
Com_812_neg	Dibenzo-18-crown-6	C20 H24 O6	360.156	9.822	Full match	No results	No results	1.99496e+07	1.43076e+07	2.88858e+07	1.57539e+07	6.6397e+07	1.45397e+07	2.37938e+07	1.53181e+07	1.2061e+07	1.52748e+07	11665172	8.78692e+06	1.83929	0.879145	0.121826	0.777778	0.670972
Com_3278_neg	1-Bromo-3,7-dimethyloctane	C10 H21 Br	220.084	8.834	Full match	No results	No results	1.98905e+06	1.1569e+06	1.35243e+06	1.93768e+06	1.67645e+06	1.34681e+06	1.44605e+06	183455	1.13181e+06	657759	864451	872101	1.83475	0.875587	0.051845	0.916667	1.03367
Com_5720_neg	CV5601000	C7 H6 N2 O3	166.037	7.059	Full match	No results	No results	266702	140049	216952	303193	339186	271258	117408	130982	113731	187527	202057	92130	1.82185	0.865404	0.00724426	0.944444	0.82899
Com_4624_neg	tert-Butyl(3,4-dichlorobutoxy)diphenylsilane	C20 H26 Cl2 O Si	380.111	15.245	Full match	No results	No results	320255	228439	276485	303179	283854	301880	196669	123684	127891	170313	152798	170742	1.81944	0.863498	8.86e-05	1	0.823523
Com_1521_neg	Sakuranin	C22 H24 O10	448.135	11.674	Full match	No results	No results	519057	354598	550909	536049	535743	510922	332971	208060	232272	314839	260849	305009	1.81819	0.862499	0.000160385	1	0.817361
Com_4257_neg	(1S)-1-Carboxy-2-(1H-imidazol-4-yl)-N,N,N-trimethylethanaminium	C9 H16 N3 O2	198.125	13.846	Full match	No results	No results	729393	541177	754697	597899	668691	604771	305448	304921	336705	332734	408422	460968	1.81306	0.858429	5.4e-05	1	0.82509
Com_4514_neg	1-(Difluoromethyl)-4-(ethylsulfanyl)benzene	C9 H10 F2 S	188.046	8.147	Full match	No results	No results	463380	285075	421930	384350	343807	350545	238408	141232	259928	209230	180816	212484	1.81072	0.85656	0.000398493	1	0.81574
Com_5936_neg	Exo2	C18 H18 N4 O2 S	354.115	2.323	Full match	No results	No results	255887	178285	204475	216641	209709	204279	146687	82264.3	95223.4	125148	120703	131018	1.81055	0.85643	0.00035789	1	0.823701
Com_2393_neg	Pleuromutilin	C22 H34 O5	378.239	12.209	Full match	No results	No results	618784	430627	573034	2.11293e+06	1.92619e+06	628477	394610	286507	260923	682261	1.48834e+06	382951	1.79942	0.847535	0.157421	0.777778	0.858085
Com_2229_neg	2-(4-Chlorophenyl)-N-[3-(1-piperidinyl)propyl]-4-quinolinamine	C23 H26 Cl N3	379.183	7.494	Full match	No results	No results	2.41244e+06	1.51502e+06	1.57204e+06	5.06549e+06	7.02344e+06	1.64554e+06	1.96699e+06	438750	1.63279e+06	3.09732e+06	1.85843e+06	1.70738e+06	1.79729	0.845822	0.193552	0.583333	0.826111
Com_2747_neg	5,6-Dioxo-1,3-cyclohexadiene-1-carboxylic acid	C7 H4 O4	152.01	7.773	Full match	No results	No results	1.06305e+06	774338	1.02822e+06	1.47036e+06	1.22055e+06	1.3663e+06	713127	564977	503908	983565	468886	624994	1.79373	0.84296	0.00222182	0.972222	0.814123
Com_2019_neg	JQ1	C23 H25 Cl N4 O2 S	456.14	11.411	Full match	No results	No results	518650	363426	453736	516332	501014	488445	310046	194012	221882	287021	272438	303775	1.7881	0.838428	0.000152706	1	0.799272
Com_4363_neg	10-Bromo-1-decanol	C10 H21 Br O	236.079	10.124	Full match	No results	No results	630250	260688	466918	528135	721357	708080	389252	319263	261683	323707	234467	329878	1.78417	0.835251	0.0162295	0.861111	0.767396
Com_4775_neg	2'-deoxy-5-methyl-5'-cytidylic acid	C10 H16 N3 O7 P	321.073	6.671	Full match	No results	No results	356274	235852	326203	423462	545296	357774	223225	162804	180900	288006	187905	218142	1.78025	0.832078	0.00299296	0.972222	0.774104
Com_624_neg	MFCD00468051	C17 H18 O7	334.104	8.489	Full match	No results	No results	1.2036e+06	803408	1.18112e+06	1.27929e+06	1.25247e+06	1.18413e+06	729638	499792	553464	731460	638882	731532	1.77721	0.82961	0.000154665	1	0.781533
Com_1642_neg	Amrubicin	C25 H25 N O9	483.151	11.427	Full match	No results	No results	489398	347837	430026	517944	459183	467495	294745	189296	225633	284188	248709	284235	1.77618	0.828777	9.39e-05	1	0.786315
Com_1854_neg	2-ACETYL-2-DECARBAMOYLOXYTETRACYCLINE	C23 H25 N O9	459.151	11.381	Full match	No results	No results	607265	389943	562192	618718	621568	625221	372754	240119	256668	362092	321501	377551	1.77393	0.826952	0.00040194	1	0.7853
Com_37_neg	Malondialdehyde	C3 H4 O2	72.0209	1.299	Full match	No results	No results	503923867	7.28006e+08	5.65551e+08	7.72078e+08	8.28004e+08	1436968750	200952381	6.2436e+08	6.01152e+08	1044960765	1.14808e+08	1.51744e+08	1.76573	0.820266	0.079505	0.75	1.12349
Com_1843_neg	4-Bromo-N-ethyl-N,2-dimethylaniline	C10 H14 Br N	227.031	12.231	Full match	No results	No results	2.15774e+06	2.13808e+06	1.68938e+06	6.29558e+06	2.38915e+06	3.119e+06	2.53311e+06	1.23784e+06	1.02264e+06	2.15814e+06	1.6248e+06	1.51696e+06	1.76241	0.817551	0.0566815	0.805556	0.727908
Com_1184_neg	Delamanid	C25 H25 F3 N4 O6	534.172	9.756	Full match	No results	No results	3.54978e+06	4.77e+06	3.39539e+06	5.29235e+06	2.04976e+06	4.40251e+06	1.40402e+06	3.77848e+06	3.17635e+06	1.9932e+06	2.15504e+06	816829	1.76073	0.816173	0.0421279	0.861111	0.914526
Com_5397_neg	(4Z)-3-(Dihydroxymethylene)-7-methyl-2,6-dioxo-4-octenoic acid	C10 H12 O6	228.062	9.918	Full match	No results	No results	239833	154305	286143	229604	343088	210857	168685	109859	118242	158019	123874	153784	1.75843	0.814289	0.0028598	0.944444	0.745881
Com_5846_neg	Idoxifene	C28 H30 I N O	523.136	7.014	Full match	No results	No results	168299	109197	161013	178739	175128	170815	107242	69126.2	81051.3	101967	89108	100451	1.75462	0.81116	0.000273472	1	0.76425
Com_3887_neg	2-oxosuccinamic acid	C4 H5 N O4	131.021	12.368	Full match	No results	No results	478899	313285	636053	710068	479895	594165	443304	230539	217460	340249	283614	316232	1.75405	0.810691	0.00600421	0.916667	0.767954
Com_6077_neg	Volkenin	C12 H17 N O7	287.099	10.475	Full match	No results	No results	116004	78196.7	101272	129460	116051	114911	74642.2	46960.3	55789.5	69305	57548.1	70782.7	1.74892	0.806468	0.000271431	1	0.763518
Com_3170_neg	(2S,3S)-2-hydroxytridecane-1,2,3-tricarboxylic acid	C16 H28 O7	332.183	8.133	Full match	No results	No results	1.26052e+06	293407	301212	328677	486500	360406	342897	203394	244049	391677	383091	168222	1.7485	0.806115	0.130761	0.694444	0.637692
Com_3944_neg	musk ambrette	C12 H16 N2 O5	268.105	3.394	Full match	No results	No results	656775	568495	605659	905418	704508	707525	452785	391784	317466	397088	391341	424671	1.74659	0.804538	7.85e-05	1	0.749986
Com_3360_neg	Benalfocin	C11 H14 Cl N	195.081	4.258	Full match	No results	No results	1.23901e+06	724885	1.08164e+06	1.28448e+06	1.04495e+06	1.09206e+06	713541	628605	430993	638227	631447	673169	1.74033	0.799358	0.000582419	1	0.749071
Com_840_neg	Tivozanib	C22 H19 Cl N4 O5	454.104	7.855	Full match	No results	No results	1.13735e+07	7.75493e+06	8.38585e+06	1.05494e+07	2.47767e+06	1.42409e+07	4.78454e+06	5.53542e+06	3.70014e+06	7.70366e+06	6.09547e+06	3.688e+06	1.73872	0.798025	0.138974	0.833333	0.6415
Com_3098_neg	Aspulvinone E	C17 H12 O5	296.068	15.101	Full match	No results	No results	518240	319750	399045	883314	558844	584788	357208	268121	257149	299089	302777	399818	1.73232	0.79271	0.0137842	0.916667	0.716846
Com_2569_neg	picrasin B	C21 H28 O6	376.188	13.276	Full match	No results	No results	378044	257719	367608	411467	389959	394124	262872	153406	175590	237801	204295	238930	1.7275	0.788683	0.000559746	0.972222	0.754162
Com_3470_neg	N-(6-Oxo-6H-benzo(c)chromen-2-yl)methanesulfonamide	C14 H11 N O4 S	289.04	12.046	Full match	No results	No results	1.42123e+06	734947	546765	883076	960773	1.0944e+06	854401	312995	413289	435923	680447	570896	1.72622	0.787614	0.019795	0.888889	0.775415
Com_2134_neg	Nemonapride (JAN)	C21 H26 Cl N3 O2	387.171	9.668	Full match	No results	No results	2.1825e+06	1.25802e+06	1.16473e+06	1.45274e+06	7.64575e+06	1.4831e+06	1.48562e+06	1.99832e+06	767898	2.59668e+06	995649	961969	1.72457	0.78624	0.313192	0.638889	0.575288
Com_209_neg	D-(-)-Lyxose	C5 H10 O5	150.052	1.411	Not the top hit	Full match	Full match	2.38593e+08	1.2971e+08	267054303	2.75644e+08	4.90802e+08	2.64875e+08	218191319	1.58903e+08	1.77572e+08	1.5591e+08	1.37236e+08	1.18842e+08	1.72417	0.785903	0.037432	0.861111	0.70657
Com_1347_neg	Candesartan	C24 H20 N6 O3	440.16	7.725	Full match	No results	No results	3.20741e+06	1.9286e+06	2.26862e+06	3.21213e+06	2.24087e+06	2.89687e+06	1.48632e+06	1.46587e+06	1.56483e+06	1.53846e+06	1.67605e+06	1.41352e+06	1.72273	0.784699	0.00133008	1	0.71547
Com_2857_neg	loliolide	C11 H16 O3	196.109	8.713	Full match	No results	No results	1.55318e+06	989200	857756	1.64922e+06	1.52467e+06	1.26924e+06	839377	625131	507944	1.08177e+06	775361	744689	1.71465	0.777912	0.00530996	0.944444	0.742416
Com_4738_neg	Fumarylacetoacetic acid	C8 H8 O6	200.031	0.525	Full match	No results	No results	338763	283140	628955	525246	431447	362183	179080	175654	290330	475620	142456	240629	1.70886	0.773036	0.0241575	0.861111	0.795942
Com_3735_neg	Propylparaben	C10 H12 O3	180.079	11.283	Full match	No results	No results	389689	201071	225390	272460	259211	239209	271838	99679.2	118175	147176	136131	156598	1.70722	0.771653	0.00871855	0.888889	0.77678
Com_1749_neg	Demethylwedelolactone ??蹉診??焦	C15 H8 O7	300.032	10.691	No match	No results	Invalid mass	1.23137e+06	623136	1.0805e+06	1.71979e+06	1.85971e+06	1.74545e+06	836158	862423	826046	574838	551747	1.19365e+06	1.70489	0.769677	0.0380553	0.861111	0.719624
Com_1895_neg	Ricinoleic Acid	C18 H34 O3	298.25	11.891	Full match	No results	No results	890403	517082	520401	664315	897879	726581	469206	424954	435055	491159	376863	277158	1.70412	0.769026	0.00265209	1	0.720063
Com_4652_neg	4-(Trimethylsilyl)-3-butyn-2-one	C7 H12 O Si	140.066	8.182	Full match	No results	No results	366618	230527	307146	373104	342848	337464	223296	142718	163546	212811	197465	209159	1.70384	0.768793	0.000389547	1	0.727525
Com_1269_neg	Estramustine	C23 H31 Cl2 N O3	439.168	7.745	Full match	No results	No results	3.79171e+06	3.32144e+06	2.88294e+06	6.0515e+06	4.28041e+06	5.6689e+06	1.97361e+06	2.26979e+06	2.97666e+06	2.40125e+06	2.04042e+06	3.62044e+06	1.70113	0.766491	0.00743114	0.916667	0.706094
Com_1174_neg	Ethyl (2E)-8-hydroxy-2-nonenoate	C11 H20 O3	200.14	9.662	Full match	No results	No results	9.8883e+06	5.98938e+06	4.55779e+06	6.20148e+06	2.97393e+07	7.05878e+06	8.65763e+06	7.00042e+06	6.75745e+06	6.89517e+06	3.95027e+06	4.05426e+06	1.69998	0.765516	0.295653	0.361111	0.551158
Com_206_neg	2-(Benzoylamino)benzoate	C14 H10 N O3	240.066	12.232	Full match	No results	No results	1.47104e+08	1.1023e+08	1.19227e+08	3.44462e+08	1.66046e+08	2.5273e+08	1.77931e+08	1.02083e+08	8.22593e+07	1.07742e+08	1.10192e+08	9.20655e+07	1.69544	0.761661	0.0547956	0.888889	0.702056
Com_1202_neg	clindamycin-2-phosphate	C18 H34 Cl N2 O8 P S	504.146	2.565	Full match	No results	No results	4.03702e+06	2.78885e+06	3.33311e+06	3.70528e+06	3.62846e+06	3.37835e+06	2.45081e+06	1.38394e+06	1.65731e+06	2.71513e+06	2.03156e+06	2.10885e+06	1.69029	0.757273	0.00172256	1	0.739033
Com_3472_neg	Premithramycin A1	C27 H28 O12	544.156	11.176	Full match	No results	No results	687205	378444	425821	488450	517451	471272	333506	204721	242318	417467	261088	298730	1.68881	0.756008	0.0025666	0.972222	0.726706
Com_3562_neg	L-(-)-Threonine	C4 H9 N O3	119.058	10.075	Full match	No results	No results	1.42103e+06	595528	1.34299e+06	1.34324e+06	1.68943e+06	1.19773e+06	1.45173e+06	577983	534583	594977	723025	614087	1.68801	0.755327	0.0281825	0.805556	0.785921
Com_4857_neg	Sarmazenil	C15 H14 Cl N3 O3	319.073	11.255	Full match	No results	No results	443073	249768	348679	504649	409547	422332	308868	206607	185785	234083	224649	251988	1.68419	0.752058	0.00247423	0.944444	0.708707
Com_190_neg	3-(1H-Imidazol-4-yl)-2-oxopropyl phosphate	C6 H7 N2 O5 P	218.009	1.533	Full match	No results	No results	4.44617e+07	3.30117e+07	6.28721e+07	7.57542e+07	4.69316e+07	132552473	5.38203e+07	5.06447e+07	3.01975e+07	3.92816e+07	3.31797e+07	2.77779e+07	1.68404	0.751926	0.0868566	0.777778	0.63439
Com_3655_neg	1-Palmitoyl lysophosphatidic acid	C19 H39 O7 P	410.244	13.218	Full match	No results	No results	235146	153354	263574	265297	230372	244410	188897	109193	104716	138243	141855	144696	1.68216	0.750316	0.00148011	0.972222	0.715789
Com_5148_neg	equilin sulfate	C18 H20 O5 S	348.104	5.77	Full match	No results	No results	475968	217497	314114	319781	326055	304963	226763	155640	153324	206561	195362	226758	1.68187	0.750062	0.00280178	0.944444	0.691316
Com_847_neg	Dimethyl (2-oxopropyl)malonate	C8 H12 O5	188.068	0.977	Full match	No results	No results	4.73889e+07	2.96707e+07	5.08547e+07	5.93447e+07	4.93584e+07	5.94523e+07	3.283e+07	2.48208e+07	2.50547e+07	3.22977e+07	3.1405e+07	3.04462e+07	1.67409	0.743375	0.00333825	0.888889	0.683881
Com_1264_neg	(-)-Andrographolide	C20 H30 O5	350.208	10.459	Full match	No results	No results	1.98536e+06	1.38414e+06	1.23134e+06	4.85837e+06	7.20995e+06	1.36972e+06	2.05871e+06	970145	1.54077e+06	2.57966e+06	2.45652e+06	1.1752e+06	1.67321	0.742617	0.375472	0.416667	0.617833
Com_2582_neg	Iristectorigenin B 臍棺?計菉羹	C17 H14 O7	330.068	8.003	No results	No results	Invalid mass	217979	130502	200348	227702	209876	205233	142888	92108.3	101139	137526	116646	125402	1.66498	0.735505	0.000969061	0.944444	0.694484
Com_5118_neg	[4-(3,5-Difluorophenyl)-2H-1,2,3-triazol-2-yl](4-morpholinyl)methanone	C13 H12 F2 N4 O2	294.094	6.066	Full match	No results	No results	473659	332505	356926	388237	521000	374910	305164	174869	184201	244239	289090	273839	1.6632	0.733963	0.00183434	1	0.705768
Com_4765_neg	flurofamide	C7 H9 F N3 O2 P	217.042	14.867	Full match	No results	No results	370133	239893	288727	357658	264235	342271	227683	161926	165953	211295	194449	158911	1.663	0.733784	0.000375982	1	0.688063
Com_331_neg	1-(3-((2',4'-Dimethyl-[4,5'-bithiazol]-2-yl)amino)phenyl)ethanone	C16 H15 N3 O S2	329.065	8.047	Full match	No results	No results	1.52603e+06	947582	1.40259e+06	1.5941e+06	1.46929e+06	1.52393e+06	1.00032e+06	669486	721980	962791	816611	934166	1.65777	0.729246	0.000715688	0.944444	0.687927
Com_6128_neg	Fumaric acid	C4 H4 O4	116.009	12.612	No results	Invalid mass	Invalid mass	92359.6	61503.6	83932.9	97406.6	91325.9	94685.7	52028.2	70369.5	38290.9	49478.3	55125.5	50828.3	1.64878	0.721401	0.000812787	0.972222	0.685506
Com_1653_neg	(2,3,4-Trimethoxy-6-octanoylphenyl)acetaldehyde	C19 H28 O5	336.192	11.318	Full match	No results	No results	750130	479937	660520	2.52931e+06	1.1626e+06	736357	467031	301706	328818	652574	1.6536e+06	435717	1.64577	0.718767	0.161026	0.833333	0.764223
Com_3062_neg	3-Mercaptopropane-1,2-diol	C3 H8 O2 S	108.024	13.806	Full match	No results	No results	752680	485744	610196	1.26132e+06	804897	1.226e+06	612440	487339	480578	551709	461525	533838	1.64379	0.717028	0.0341047	0.861111	0.640006
Com_4834_neg	2-trans,6-trans-farnesyl diphosphate(3-)	C15 H25 O7 P2	379.11	7.933	Invalid mass	No results	No results	334012	235826	323318	481678	322028	369313	211330	174248	185018	260664	229862	196675	1.64269	0.716063	0.00222675	0.972222	0.660854
Com_5142_neg	MU-Ac	C12 H10 O4	218.059	4.819	Full match	No results	No results	504337	203494	522261	301253	285144	277728	341382	177306	187721	155876	172382	241533	1.64098	0.714558	0.0338974	0.861111	0.646528
Com_2525_neg	Astringin	C20 H22 O9	406.125	11.273	Full match	No results	No results	559448	366358	494280	592365	587206	520072	403040	228536	262585	330820	317847	361562	1.63818	0.712092	0.00133021	0.972222	0.684278
Com_103_neg	┒-Lactose	C12 H22 O11	388.12	1.391	No match	Invalid mass	Invalid mass	2.62295e+07	9.00844e+08	4.69189e+07	7.28176e+08	8.30255e+08	1920327028	2395736063	4.19715e+07	2.49775e+08	8.40016e+06	2.13513e+07	5.99918e+06	1.6351	0.709376	0.160814	0.75	2.47689
Com_6032_neg	sivifene	C19 H14 N4 O6	394.091	8.887	Full match	No results	No results	113291	73101.4	101491	111967	112055	108052	71125.6	51650.8	55204.2	73999.7	62119.9	66218.9	1.6301	0.704959	0.000335264	0.972222	0.663227
Com_3213_neg	millettone	C22 H18 O6	378.11	7.608	Full match	No results	No results	397965	323827	365870	294182	246054	305945	174152	173621	148986	349701	166918	173114	1.62988	0.704768	0.00686421	0.888889	0.724435
Com_4549_neg	(E)-Diisopropyl azodicarboxylate	C8 H14 N2 O4	202.095	3.385	Full match	No results	No results	581770	325666	359956	433549	487203	394327	308686	266937	213592	257334	261056	279407	1.62725	0.70244	0.00139412	1	0.646461
Com_5568_neg	2,6-Dihydroxy-4-Methoxytoluene	C8 H10 O3	154.061	7.162	No results	No results	Invalid mass	191197	154965	191243	224239	316901	187549	194052	92874	110710	136755	115393	129123	1.62548	0.700861	0.00645263	0.888889	0.674213
Com_6050_neg	Guvacine	C6 H9 N O2	127.063	6.531	Full match	No results	No results	99840.2	103645	121766	297801	266759	288990	118032	89289.2	193539	143079	73939.7	107821	1.62436	0.699875	0.141575	0.722222	0.6319
Com_1863_neg	5-(Chlorocarbonyl)-5-hexen-1-yl 4-chlorobenzoate	C14 H14 Cl2 O3	300.032	13.852	Full match	No results	No results	1.91749e+06	2.27675e+06	2.63038e+06	4.1373e+06	4.3249e+06	4.9365e+06	2.56354e+06	2.09483e+06	1.73754e+06	2.64524e+06	1.54585e+06	1.91298e+06	1.61787	0.694095	0.0430273	0.833333	0.617968
Com_1345_neg	Medrogestone	C23 H32 O2	340.241	13.206	Full match	No results	No results	1.98026e+06	1.11274e+06	1.82471e+06	2.27795e+06	2.02992e+06	2.52573e+06	2.07121e+06	856366	1.16511e+06	1.10904e+06	1.14016e+06	938712	1.61406	0.690691	0.0168373	0.833333	0.707852
Com_5800_neg	Dehydrorabelomycin	C19 H12 O5	320.069	11.041	Full match	No results	No results	114398	72512.1	137614	177534	117559	115066	82545.8	65495	70159.3	94923.8	65400.4	77064.3	1.6126	0.68939	0.0108601	0.916667	0.622671
Com_5334_neg	Razupenem	C18 H21 N3 O4 S2	407.096	7.27	Full match	No results	No results	223635	147080	220229	234844	232633	222898	154601	94747.8	101560	139094	165578	142651	1.6052	0.682751	0.00255903	0.944444	0.659482
Com_5438_neg	N,3,5-Trimethoxy-N-methylbenzamide	C11 H15 N O4	225.099	10.082	Full match	No results	No results	285285	152761	271782	241900	226277	301330	198261	117978	143255	156708	132416	172996	1.60516	0.682714	0.00482557	0.916667	0.638625
Com_35_neg	(2R)-2,3-Dihydroxypropanoic acid	C3 H6 O4	106.026	1.384	Invalid mass	Invalid mass	No results	3.96469e+08	2.76142e+08	3.49072e+08	5.61998e+08	5.66057e+08	5.32753e+08	3.88724e+08	2.36616e+08	2.32234e+08	2.97663e+08	2.62557e+08	2.55046e+08	1.60355	0.681274	0.0125543	0.916667	0.653763
Com_139_neg	avicularin	C20 H18 O11	434.084	9.902	Partial match	No results	Full match	1.52062e+08	185169893	1.69082e+08	3.685e+08	5.55406e+08	291350462	2.52804e+08	1.82093e+08	1.7817e+08	1.70691e+08	1.08111e+08	1.82427e+08	1.60251	0.680333	0.139979	0.694444	0.584496
Com_609_neg	DL-Mevalonic acid	C6 H12 O4	148.073	2.081	Full match	No results	No results	1.08983e+07	6.79894e+06	9.19861e+06	1.21569e+07	1.2941e+07	1.0134e+07	1.07673e+07	6.07325e+06	3.70785e+06	5.95393e+06	6.74276e+06	5.54603e+06	1.6016	0.679511	0.0164267	0.916667	0.703198
Com_124_neg	N-Acetylleucylleucine	C14 H26 N2 O4	286.188	7.27	Full match	No results	No results	1187797883	7.81213e+08	1285930568	1342109528	1297580070	1515522039	1262081264	7.10418e+08	1.2979e+08	9.37186e+08	7.87111e+08	8.11653e+08	1.59762	0.675926	0.114997	0.861111	0.876915
Com_2194_neg	5-Pentylresorcinol	C11 H16 O2	180.114	7.055	Full match	No results	No results	2.52393e+06	1.68468e+06	1.27836e+06	2.06202e+06	7.22754e+06	1.36507e+06	1.16927e+06	2.01056e+06	1.80041e+06	2.34744e+06	1.24048e+06	1.59287e+06	1.58858	0.667738	0.343731	0.666667	0.417534
Com_4496_neg	Juniperic acid	C16 H32 O3	272.235	14.887	Full match	No results	No results	605586	622500	515399	676860	769151	885696	627131	219922	364489	398050	559771	406794	1.58189	0.661647	0.020432	0.888889	0.68107
Com_4835_neg	4-Oxobutanenitrile	C4 H5 N O	83.0368	4.713	Full match	No results	No results	527366	341578	450315	606745	503634	439440	374174	222747	233821	370022	301904	311464	1.58152	0.661308	0.00335108	0.944444	0.63703
Com_429_neg	Phthalic acid	C8 H6 O4	166.026	10.678	Full match	No results	No results	1.04979e+07	1.35773e+07	1.11415e+07	2.22571e+07	9.71929e+06	1.0535e+07	1.12398e+07	4.01091e+06	4.90877e+06	8.73759e+06	6.64827e+06	1.37121e+07	1.578	0.658095	0.0594017	0.75	0.684062
Com_1431_neg	6,7,8-Trihydroxy-2H-chromen-2-one	C9 H6 O5	194.021	7.14	Full match	No results	No results	2.63803e+06	1.59339e+06	2.44926e+06	2.68173e+06	2.37413e+06	1.7692e+06	1.1196e+06	1.00398e+06	1.41577e+06	1.74817e+06	1.78359e+06	1.50364e+06	1.57506	0.655405	0.00584694	0.916667	0.621023
Com_2775_neg	pelitinib	C24 H23 Cl F N5 O2	467.154	8.39	Full match	No results	No results	331107	233955	291425	420861	340455	335343	244985	161179	179989	245450	194686	220558	1.56647	0.647515	0.00186548	0.944444	0.614258
Com_85_neg	Oxazolam	C18 H17 Cl N2 O2	328.099	1.382	Full match	No results	No results	3.86682e+07	1070853467	6.25764e+07	7.46794e+08	9.53605e+08	2130080062	2837064570	5.12441e+07	2.58412e+08	2.17404e+07	3.06324e+07	1.5433e+07	1.55624	0.638065	0.176636	0.75	2.13437
Com_5761_neg	ALTERPERYLENOL	C20 H14 O6	350.079	10.968	Full match	No results	No results	161692	67788.6	107014	140612	176173	594631	145283	49237	169690	146444	123501	170848	1.5502	0.632451	0.490982	0.555556	0.569775
Com_38_neg	Pyruvic acid	C3 H4 O3	88.0158	1.579	Full match	No results	No results	4.22322e+08	2.37656e+08	3.05951e+08	4.09022e+08	3.46161e+08	379952642	3.19887e+08	1.63215e+08	187076173	2.36631e+08	2.15126e+08	2.33921e+08	1.54962	0.631915	0.00643239	0.944444	0.620306
Com_3765_neg	3,4,5-Trimethoxyphenylacetic acid	C11 H14 O5	226.083	5.099	Full match	No results	No results	887193	757007	1.01361e+06	979276	1.04961e+06	1.01304e+06	571585	336295	436528	863502	732241	743070	1.54749	0.629926	0.0206845	0.972222	0.654017
Com_2016_neg	2-(1-Cyclopenten-1-yl)ethyl benzenesulfonate	C13 H16 O3 S	252.083	8.846	Full match	No results	No results	913817	423896	931280	937148	509671	649339	491246	340611	254102	605168	528795	624247	1.53477	0.618023	0.0596548	0.805556	0.586217
Com_5628_neg	Hippuric acid	C9 H9 N O3	179.055	6.697	No results	Invalid mass	No results	282536	178307	258652	301463	280987	272001	176724	134011	142084	236437	165664	170631	1.53473	0.617986	0.0032392	0.972222	0.593607
Com_4927_neg	3-O-feruloyl-D-quinic acid	C17 H20 O9	368.112	10.369	Full match	No results	No results	161324	111120	145676	159669	170519	151225	110843	83228.4	91890.5	114374	86361.9	100230	1.53262	0.615996	0.000442545	0.972222	0.581031
Com_855_neg	2-Methoxy-5-nitrophenol	C7 H7 N O4	169.037	7.421	Full match	No results	No results	1.06254e+07	6.76732e+06	6.9997e+06	7.47034e+06	1.91908e+07	7.49157e+06	1.02997e+07	8.11626e+06	3.33246e+06	9.27771e+06	2.90102e+06	4.27809e+06	1.53238	0.615776	0.126509	0.666667	0.669005
Com_2740_neg	Methylsulfonylmethane	C2 H6 O2 S	94.0084	15.014	Full match	No results	No results	544667	581111	801945	1.10369e+06	676040	1.20667e+06	657732	727048	450780	386553	465774	530448	1.52691	0.610619	0.0393339	0.861111	0.547318
Com_3599_neg	(+)-ainsliadimer A	C30 H34 O7	506.231	9.636	Full match	No results	No results	435749	235092	424502	707387	680116	588240	411160	287665	304871	408367	251333	351393	1.52427	0.608119	0.0834765	0.833333	0.592333
Com_178_neg	2-Hydroxycinnamic acid	C9 H8 O3	164.047	3.219	Not the top hit	Full match	Full match	1.31232e+08	148791816	1.0581e+08	1.16733e+08	9.36825e+08	1.08771e+08	2.32844e+08	267851865	1.35245e+08	1.79046e+08	8.51e+07	1.16248e+08	1.52328	0.607179	0.836288	0.583333	0.274674
Com_2022_neg	Elvitegravir	C23 H23 Cl F N O5	447.123	8.727	Full match	No results	No results	1.75972e+06	1.35564e+06	1.89272e+06	1.41912e+06	714370	2.60964e+06	472125	1.88002e+06	558654	1.76569e+06	1.21826e+06	519348	1.52028	0.604337	0.139672	0.75	0.737791
Com_3339_neg	(1beta,3beta,5beta,25S)-3-Hydroxyspirostan-1-yl beta-D-ribopyranoside	C32 H52 O8	564.365	13.058	Full match	No results	No results	364077	249366	327913	372725	463765	379035	293783	130421	153381	208371	424875	208637	1.5195	0.603596	0.0418233	0.833333	0.668121
Com_4515_neg	N,N,N-Trimethyl-2-phosphonoethanaminium	C5 H15 N O3 P	168.078	12.055	Invalid mass	No results	No results	609790	523749	406293	863167	636855	540568	430601	400400	397588	342650	477850	313068	1.51574	0.600026	0.00970601	0.944444	0.546358
Com_3423_neg	L787257	C17 H13 Cl N2 O2 S	344.039	11.232	Full match	No results	No results	451708	285033	424773	503329	501487	425914	380919	198733	242197	297552	270294	323243	1.51333	0.597729	0.00786047	0.916667	0.586182
Com_5066_neg	2-[4-(4-Chlorophenyl)-4-oxobutyl]-1H-isoindole-1,3(2H)-dione	C18 H14 Cl N O3	327.066	6.244	Full match	No results	No results	82504.7	54879.5	75561.5	82814.3	87987.8	84843.2	61578.7	38013.1	42108.9	57685.6	53776.8	57161.2	1.51	0.594552	0.00306371	0.916667	0.573598
Com_4747_neg	4-O-beta-D-Xylopyranosyl-D-xylopyranose	C10 H18 O9	282.094	8.904	Full match	No results	No results	408353	199008	265659	408646	384193	505834	244729	213765	195894	235059	299565	257422	1.50141	0.586319	0.0462208	0.833333	0.545986
Com_405_neg	Hex-2-ulofuranosyl hexopyranosyl-(1->6)hexopyranoside	C18 H32 O16	504.167	1.395	Full match	No results	No results	3.51191e+07	1.54799e+07	4.01622e+07	3.8654e+07	3.20012e+07	4.06482e+07	3.04612e+07	22135072	1.85779e+07	2.79854e+07	1.78119e+07	1.78303e+07	1.49898	0.583978	0.0636354	0.833333	0.563508
Com_1708_neg	Lusitanicoside	C21 H30 O10	442.182	10.995	Full match	No results	No results	741296	545273	622122	744784	704156	707898	475477	363465	433721	579133	397558	463870	1.49841	0.583436	0.00070245	0.972222	0.557813
Com_2438_neg	Fenipentol	C11 H16 O	164.119	12.886	Full match	No results	No results	2.80384e+06	1.56091e+06	3.91977e+06	5.03979e+06	2.44388e+06	3.08593e+06	3.76478e+06	597253	1.48667e+06	1.38944e+06	1.92427e+06	3.43149e+06	1.49708	0.582155	0.150738	0.75	0.73085
Com_4039_neg	N(4)-phosphoagmatine	C5 H15 N4 O3 P	210.088	14.891	Full match	No results	No results	167048	148866	146006	163084	200358	157059	124851	80414.3	120463	117446	115995	99304.9	1.49196	0.577213	0.000872961	1	0.551021
Com_1383_neg	Spiraprilat	C20 H26 N2 O5 S2	438.127	7.894	Full match	No results	No results	7.67137e+06	2.90864e+06	4.82687e+06	6.44737e+06	4.33797e+06	5.14349e+06	3.32989e+06	2.35059e+06	4.01991e+06	4.09532e+06	3.67596e+06	3.59423e+06	1.48751	0.572898	0.0498401	0.861111	0.520705
Com_5489_neg	Succinic acid	C4 H6 O4	118.026	5.164	Full match	No results	No results	206231	141175	191935	444192	193763	201443	162992	132033	143292	116220	176750	201949	1.47738	0.563038	0.0945932	0.805556	0.477574
Com_2935_neg	Cyanolide A Aglycon	C26 H44 O8	484.302	12.89	Full match	No results	No results	694875	458091	534503	1.04025e+06	852460	699642	488088	421053	415044	969884	313337	320206	1.46188	0.547825	0.0719114	0.833333	0.609701
Com_2192_neg	adenosine 5▽-phosphoramidate	C10 H15 N6 O6 P	346.081	9.844	Full match	No results	No results	620134	445030	524448	663452	622531	575709	500310	297842	347209	435170	349315	435157	1.45932	0.545299	0.00333053	0.972222	0.531296
Com_2837_neg	Methyl 4-[2-(3-bromophenyl)-2-cyclobutylethyl]benzoate	C20 H21 Br O2	372.072	14.438	Full match	No results	No results	2.73345e+06	1.47057e+06	2.638e+06	3.32761e+06	2.63903e+06	3.88302e+06	2.68556e+06	1.67916e+06	1.65413e+06	1.8665e+06	1.60958e+06	1.95208e+06	1.45817	0.544157	0.0536331	0.777778	0.530866
Com_390_neg	Diosmin	C28 H32 O15	608.173	9.433	Full match	No results	No results	3.65918e+06	1.91788e+06	885031	2.66576e+06	983790	2.7686e+06	936652	1.1333e+06	996919	3.76291e+06	1.3367e+06	669977	1.45763	0.543621	0.241056	0.638889	0.578976
Com_459_neg	2-{[(3-Hydroxy-2-oxo-2,3-dihydro-1H-indol-3-yl)acetyl]amino}succinate	C14 H12 N2 O7	320.065	7.973	Full match	No results	No results	7.32686e+06	4.28976e+06	6.45103e+07	6.05157e+06	908849	1.91495e+07	1.6756e+06	5.36849e+06	6.67763e+06	3.41274e+07	1.71587e+07	5.41611e+06	1.45173	0.537778	0.979632	0.527778	0.5128
Com_5300_neg	Aprobarbital	C10 H14 N2 O3	210.1	6.041	Full match	No results	No results	369613	444730	340364	498128	358872	346013	334832	188175	279810	257299	259296	306347	1.45023	0.53628	0.00475972	1	0.514012
Com_1469_neg	Phosphomevalonic acid	C6 H13 O7 P	228.041	8.209	Full match	No results	No results	1.29168e+06	893578	1.76862e+06	1.23666e+06	1.47397e+06	1.11004e+06	877463	744350	947151	923383	823782	1.07949e+06	1.4409	0.52697	0.0130548	0.916667	0.474523
Com_3690_neg	MFCD00010043	C16 H10 S	234.051	8.241	Full match	No results	No results	1.0989e+06	729777	799582	736337	798005	959604	1.28971e+06	301094	466366	434292	459791	605065	1.44031	0.526381	0.0680671	0.833333	0.646582
Com_436_neg	Talampicillin	C24 H23 N3 O6 S	481.129	6.59	Full match	No results	No results	1.32321e+06	905592	1.23111e+06	1.38241e+06	1.31441e+06	1.30335e+06	915652	695249	728255	1.17652e+06	787252	896058	1.43491	0.520961	0.00479587	0.944444	0.505611
Com_9_neg	┒,┒-Trehalose	C12 H22 O11	342.115	1.391	Not the top hit	Full match	Not the top hit	3.92167e+08	1009805830	4.65858e+08	1945162657	1373975137	2552309366	2436673052	3.8875e+08	5.23583e+08	1564160878	3.13773e+08	1.71669e+08	1.43357	0.519611	0.297905	0.694444	0.901909
Com_2315_neg	Correolide	C40 H52 O16	788.328	11.051	Full match	No results	No results	489236	322547	442449	507648	515424	492320	351616	270128	299289	414535	273144	323409	1.43346	0.519504	0.00457512	0.916667	0.499331
Com_154_neg	4-Oxoproline	C5 H7 N O3	129.042	1.416	Not the top hit	Full match	No results	2.93782e+08	2.34341e+08	3.02611e+08	3.7695e+08	1057791399	4.08709e+08	1.37738e+08	2.64213e+08	4.06021e+08	7.51898e+08	1.2756e+08	1.81252e+08	1.43105	0.517079	0.254185	0.722222	0.602711
Com_1082_neg	sinapoyltartronic acid	C14 H14 O9	326.062	6.578	Full match	No results	No results	696242	492483	669508	751789	696908	696590	489541	378093	396043	639305	411874	487297	1.42873	0.514733	0.0050097	0.972222	0.500067
Com_1252_neg	(2E)-3,7-Dimethyl-2,6-octadien-1-yl beta-D-glucopyranoside	C16 H28 O6	316.187	11.688	Full match	No results	No results	9.14281e+06	1.10162e+07	2.1742e+07	1.25078e+07	1.52284e+07	1.09009e+07	1.51672e+07	6.14938e+06	6.77514e+06	5.74919e+06	7.4462e+06	1.54349e+07	1.41987	0.505763	0.108346	0.75	0.542999
Com_2482_neg	manzamine A	C36 H44 N4 O	548.354	11.477	Full match	No results	No results	913267	1.22639e+06	871253	1.48396e+06	5.02337e+06	763853	1.60137e+06	1.06204e+06	1.10903e+06	1.11182e+06	562104	1.80199e+06	1.41854	0.50441	0.638922	0.527778	0.296347
Com_4480_neg	3-Phenylpropanoic acid	C9 H10 O2	150.067	6.106	Full match	No results	No results	579100	421935	928018	652399	495632	754230	462581	402181	524678	424470	344344	549900	1.41473	0.500529	0.0431188	0.833333	0.442373
Com_1643_neg	Nandrolone	C18 H26 O2	274.194	11.886	Full match	No results	No results	6.53594e+06	4.88051e+06	3.12563e+06	4.25886e+06	1.39943e+07	2.95857e+06	6.99625e+06	5.0924e+06	3.41985e+06	4.78465e+06	1.9913e+06	3.24892e+06	1.40028	0.485712	0.405981	0.555556	0.397183
Com_2013_neg	Olprinone	C14 H10 N4 O	250.086	9.566	Full match	No results	No results	123616	87749.6	186891	248084	219867	170966	141478	106362	111940	139789	95938.9	145933	1.39886	0.484253	0.137329	0.75	0.447333
Com_11_neg	2-Deoxypentose	C5 H10 O4	134.057	1.435	Full match	No results	No results	4.75661e+08	3.74877e+08	2.6286e+08	8.81965e+08	672345115	906902456	4.09607e+08	6.62894e+08	3.6668e+08	4.63245e+08	3.29289e+08	3.23703e+08	1.39884	0.484226	0.271428	0.722222	0.458321
Com_2528_neg	Sebacic acid	C10 H18 O4	202.12	12.372	Full match	No results	No results	935002	756429	994873	872484	1.24764e+06	834091	788682	572308	508047	666947	626762	875942	1.39662	0.481941	0.0111988	0.888889	0.460277
Com_1725_neg	Estra-1,3,5(10)-trien-3-ol	C18 H24 O	256.183	11.883	Full match	No results	No results	4.65666e+06	3.56145e+06	2.23809e+06	2.91097e+06	1.28595e+07	2.06292e+06	6.19487e+06	4.40865e+06	2.49836e+06	3.4853e+06	1.37978e+06	2.32371e+06	1.39422	0.479456	0.542077	0.555556	0.38043
Com_2817_neg	3,5-Di-t-butylcatechol	C14 H22 O2	222.161	12.156	Full match	No results	No results	482637	321007	463848	633124	1.18323e+06	346908	356918	473845	424188	359852	565393	284423	1.392	0.477161	0.285315	0.638889	0.377072
Com_2657_neg	(.+/-.)-Tartaric acid	C4 H6 O6	150.016	14.812	Full match	No results	No results	639750	250449	701853	576220	475609	995446	644367	304780	375999	417077	421231	469313	1.38232	0.467092	0.246403	0.75	0.459549
Com_2415_neg	ribisin A	C13 H12 O5	248.067	11.127	Full match	No results	No results	568676	578796	475179	598929	598453	821451	421860	444740	323102	673182	401821	373468	1.38031	0.464987	0.0243239	0.861111	0.457069
Com_345_neg	Maslinic acid	C30 H48 O4	472.354	14.235	Full match	No results	No results	2.41601e+07	1.77904e+07	5.16635e+07	5.40773e+07	4.16763e+07	3.93238e+07	2.64589e+07	3.43369e+07	3.16524e+07	2.86002e+07	2.39689e+07	2.10079e+07	1.37745	0.462001	0.227183	0.722222	0.379756
Com_2680_neg	2-amino-2,3,7-trideoxy-D-lyxo-hept-6-ulosonic acid	C7 H13 N O5	191.08	8.246	Full match	No results	No results	135274	94124.8	119064	138708	135049	136232	102144	83929.1	103316	93628.9	73495.9	98999.6	1.36532	0.449236	0.00374231	0.916667	0.428133
Com_2721_neg	DL-Ornithine	C5 H12 N2 O2	132.09	4.619	Full match	No results	No results	2.52223e+06	1.58384e+06	353453	2.4952e+06	3.76655e+06	3.01682e+06	1.99258e+06	1.29251e+06	1.35707e+06	2.55696e+06	292709	2.59183e+06	1.36241	0.44616	0.554225	0.666667	0.633578
Com_511_neg	MFCD00075980	C11 H12 O4	208.073	8.726	Full match	No results	No results	2.86981e+07	1.43924e+07	5.13192e+07	4.357e+07	1.71209e+07	3.55496e+07	2.02899e+07	4.04388e+07	2.42472e+07	2.97397e+07	1.50651e+07	1.06742e+07	1.35738	0.440823	0.323774	0.666667	0.405201
Com_8_neg	Threose, D-	C4 H8 O4	120.042	1.433	Full match	No results	No results	6.32058e+08	4.76865e+08	3.80807e+08	1012777901	9.17267e+08	1063786624	6.59796e+08	7.69342e+08	4.77285e+08	5.02545e+08	4.87841e+08	4.21514e+08	1.35115	0.434191	0.239877	0.638889	0.442127
Com_1613_neg	Allopregnanolone	C21 H34 O2	318.256	14.62	Full match	No results	No results	7.75516e+06	5.60941e+06	8.23728e+06	1.31897e+07	6.64881e+06	1.51056e+07	1.24028e+07	8.67285e+06	5.96302e+06	3.45835e+06	6.66713e+06	4.71698e+06	1.35015	0.433123	0.217722	0.694444	0.482507
Com_627_neg	4,6,8-trihydroxy-7-methoxy-3-methyl-3,4-dihydroisochromen-1-one	C11 H12 O6	240.066	14.673	No match	No results	Invalid mass	1.28997e+07	8.93604e+06	1.11739e+07	1.80524e+07	1.51201e+07	1.83045e+07	1.03283e+07	1.19543e+07	9.98846e+06	9.24007e+06	9.4136e+06	1.16734e+07	1.34967	0.432603	0.065799	0.777778	0.400726
Com_5412_neg	ortho-Phthalaldehyde	C8 H6 O2	134.036	14.97	Full match	No results	No results	332155	155441	370772	294112	329345	236582	218784	185604	186306	260022	188611	235279	1.34819	0.431021	0.101973	0.805556	0.38285
Com_2874_neg	(2R)-1-(beta-D-Galactopyranosyloxy)-3-hydroxy-2-propanyl palmitate	C25 H48 O9	492.328	14.79	Full match	No results	No results	558533	356491	511217	704068	534073	601174	483562	402536	326064	401471	372747	436732	1.34767	0.430468	0.0288336	0.861111	0.413282
Com_2142_neg	Methylsuccinic acid	C5 H8 O4	132.044	7.521	No results	Invalid mass	No results	1.39898e+06	1.56653e+06	1.73282e+06	1.50645e+06	638236	2.97689e+06	496581	989380	1.38798e+06	2.61923e+06	1.05391e+06	769989	1.34205	0.42444	0.29785	0.75	0.510238
Com_1032_neg	Myxochlin A	C20 H26 N2 O7	406.174	10.085	Full match	No results	No results	9.36346e+06	8.06623e+06	9.71564e+06	9.60764e+06	8.2283e+06	8.78388e+06	6.12318e+06	4.25187e+06	5.91808e+06	9.16498e+06	7.43923e+06	7.21215e+06	1.34046	0.422728	0.0293797	0.916667	0.43219
Com_1932_neg	aplidiopsamine A	C17 H13 N7	315.122	9.71	Full match	No results	No results	4.90116e+06	3.31737e+06	5.59344e+06	5.03831e+06	9.67757e+06	2.37229e+06	6.46718e+06	2.27753e+06	3.06999e+06	4.7987e+06	2.62023e+06	3.83924e+06	1.33924	0.421416	0.324701	0.694444	0.401557
Com_608_neg	Bis(2-phenylpropyl)silane	C18 H24 Si	268.166	10.524	Full match	No results	No results	3.21526e+07	1.98009e+07	1.14937e+07	2.56258e+07	111261323	2.20775e+07	3.03991e+07	3.22171e+07	2.10298e+07	3.90365e+07	1.94651e+07	2.39997e+07	1.33864	0.42077	0.921118	0.555556	0.4042
Com_1094_neg	Bipinnatin K	C23 H26 O9	446.156	10.977	Full match	No results	No results	5.22241e+06	4.9313e+06	1.39797e+07	6.6731e+06	5.93708e+06	7.34438e+06	4.24934e+06	7.19783e+06	4.57923e+06	7.66868e+06	5.45763e+06	3.88917e+06	1.33431	0.41609	0.218811	0.694444	0.365651
Com_443_neg	bungeiside C	C19 H26 O11	430.146	8.726	Partial match	No results	Full match	3.35505e+07	1.39045e+07	5.92776e+07	6.52924e+07	2.08148e+07	3.47305e+07	2.591e+07	5.19919e+07	2.78358e+07	3.76598e+07	1.71805e+07	1.00554e+07	1.33368	0.415412	0.429537	0.638889	0.406853
Com_3943_neg	DC2810000	C9 H12 O3	168.078	3.624	Full match	No results	No results	1.10438e+06	611656	582748	1.06052e+06	517018	630259	633618	658113	511223	646940	494359	440427	1.33146	0.41301	0.1342	0.666667	0.348714
Com_587_neg	sulfoacetaldehyde	C2 H4 O4 S	123.982	1.192	Invalid mass	No results	No results	5.79461e+07	2.12703e+07	3.52314e+07	7.08005e+07	6.70177e+07	4.42418e+07	3.55227e+07	2.86407e+07	3.39484e+07	4.4951e+07	4.61842e+07	3.35842e+07	1.33064	0.412118	0.309605	0.694444	0.458584
Com_2480_neg	Leukotriene B4	C20 H32 O4	336.229	12.889	Full match	No results	No results	1.71567e+06	1.4424e+06	3.47923e+06	4.00179e+06	1.36891e+06	2.42388e+06	3.81421e+06	565596	1.40383e+06	149146	1.70778e+06	3.20537e+06	1.33063	0.412105	0.270075	0.666667	0.869388
Com_935_neg	nhatrangin A	C21 H32 O8	412.208	9.306	Full match	No results	No results	2.15756e+06	1.66686e+06	1.58841e+06	2.06862e+06	5.11464e+06	3.02491e+06	2.54698e+06	1.62973e+06	1.63774e+06	2.71861e+06	1.62085e+06	1.60563e+06	1.32837	0.409655	0.312165	0.666667	0.417565
Com_1372_neg	clazolam	C18 H17 Cl N2 O	312.104	11.478	Full match	No results	No results	2.32965e+06	1.33931e+06	2.52544e+06	1.84265e+06	2.0758e+06	1.59224e+06	1.72646e+06	1.39674e+06	1.57839e+06	1.57053e+06	1.10428e+06	1.45471e+06	1.32544	0.406468	0.0476123	0.833333	0.366303
Com_384_neg	2-C-methylerythritol 4-phosphate	C5 H13 O7 P	216.039	1.899	Full match	No results	No results	2.22477e+07	9.62472e+06	1.14656e+07	9.67581e+06	1.05675e+07	8.97049e+06	1.25117e+07	6.03622e+06	7.33849e+06	1.01384e+07	8.01306e+06	1.11031e+07	1.31575	0.395885	0.189389	0.666667	0.346145
Com_3119_neg	THREO-SPHINGOSINE, (-)-	C18 H37 N O2	299.281	14.893	Full match	No results	No results	550096	222008	300569	338275	510100	444179	354318	338949	200711	322309	390044	197728	1.31106	0.390733	0.198985	0.694444	0.424337
Com_1368_neg	(6R)-6-Hydroxy-3-(2-hydroxyethyl)-2,4,4-trimethyl-2-cyclohexen-1-one	C11 H18 O3	198.125	5.943	Full match	No results	No results	851242	598149	816567	900100	1.42777e+06	1.05555e+06	878827	707418	691149	628123	671249	736355	1.30981	0.389361	0.103061	0.777778	0.374044
Com_299_neg	Succinic anhydride	C4 H4 O3	100.016	1.485	Full match	No results	No results	1.34618e+08	7.36058e+07	1.39931e+08	1.0286e+08	1.76176e+08	9.26162e+07	9.92615e+07	1.04645e+08	6.97226e+07	7.03351e+07	8.98489e+07	1.15896e+08	1.30943	0.388943	0.148762	0.75	0.342707
Com_1486_neg	Dibutyl phthalate	C16 H22 O4	278.15	12.375	Invalid mass	No results	No results	5.00125e+06	2.87475e+06	1.35855e+06	4.25836e+06	5.26835e+06	4.12402e+06	5.26275e+06	2.56044e+06	3.47574e+06	2.82405e+06	2.0318e+06	1.32965e+06	1.3089	0.38835	0.361219	0.722222	0.529419
Com_1740_neg	dermacozine E	C23 H16 N4 O3	396.123	9.447	Full match	No results	No results	1.473e+06	917605	1.26097e+06	1.49325e+06	1.37227e+06	1.40991e+06	1.17222e+06	873428	892219	1.13495e+06	924766	1.05879e+06	1.30887	0.388322	0.017909	0.888889	0.379558
Com_5321_neg	epsilon-Caprolactone	C6 H10 O2	114.068	0.717	Full match	No results	No results	427400	176237	238097	367356	365569	318130	266551	129457	183926	314913	224233	328165	1.30786	0.387204	0.194411	0.75	0.459792
Com_1132_neg	adenosine 5'-(hexanoyl phosphate)	C16 H24 N5 O8 P	445.136	8.903	Full match	No results	No results	5.67374e+06	3.69265e+06	1.4271e+06	5.13421e+06	796905	1.12977e+07	2.56056e+06	7.20717e+06	2.30819e+06	4.92293e+06	3.03408e+06	1.41826e+06	1.30633	0.385516	0.881476	0.583333	0.11928
Com_4890_neg	1-Phenyl-1-propanethiol	C9 H12 S	152.066	3.538	Full match	No results	No results	218336	164934	194712	211765	222318	191809	178555	140345	116680	160386	147173	178959	1.30558	0.384692	0.00832931	0.944444	0.374016
Com_5581_neg	Ulimorelin	C30 H39 F N4 O4	538.296	10.789	Full match	No results	No results	224698	197248	292459	276892	570125	223441	363972	278113	289657	153063	111141	173237	1.3036	0.382497	0.27854	0.638889	0.407625
Com_5571_neg	Lenvatinib	C21 H19 Cl N4 O4	426.11	9.449	Full match	No results	No results	121614	86448.8	120014	139563	130348	124789	103911	81497.8	81947.5	102215	87596.9	99425.5	1.29857	0.376925	0.0126891	0.888889	0.362498
Com_262_neg	Cefepime	C19 H24 N6 O5 S2	480.125	6.603	Full match	No results	No results	684253	492112	638599	751223	712279	696066	497578	377809	648866	639337	427804	486931	1.29113	0.36864	0.0352357	0.861111	0.371577
Com_5831_neg	(2E)-3-(6-Hydroxy-4-oxido-3-oxo-1,4-cyclohexadien-1-yl)acrylate	C9 H6 O5	194.023	6.626	Invalid mass	No results	No results	206593	148195	189956	213424	216361	200288	144326	189539	111807	194204	129949	146088	1.28267	0.359153	0.035805	0.916667	0.357823
Com_1514_neg	Swertianolin	C20 H20 O11	436.099	6.313	Full match	No results	No results	4.74811e+06	2.38579e+06	4.07823e+06	3.57141e+06	3.11183e+06	3.03453e+06	3.24403e+06	2.10802e+06	2.22438e+06	2.51468e+06	3.21827e+06	3.09497e+06	1.27587	0.351487	0.0947129	0.75	0.326552
Com_867_neg	Fusicoccin H	C26 H42 O8	482.286	12.954	Full match	No results	No results	2.63691e+07	9.80641e+06	1.31043e+07	3.04228e+07	5.71291e+07	7.01478e+06	3.14864e+07	8.87966e+06	2.04471e+07	1.94152e+07	2.8248e+07	5.39578e+06	1.26323	0.337114	0.73582	0.444444	0.543149
Com_1038_neg	Etoglucid	C12 H22 O6	262.141	9.714	Full match	No results	No results	1.66331e+06	964936	2.1693e+06	1.68184e+06	1.28357e+06	1.88999e+06	2.23573e+06	704882	925390	1.03865e+06	1.28618e+06	1.4817e+06	1.25812	0.331267	0.22202	0.694444	0.397242
Com_4438_neg	5-Formyluracil	C5 H4 N2 O3	140.023	0.738	Full match	No results	No results	501849	248855	635063	561146	576374	356019	448504	300340	269824	387654	511672	370684	1.25806	0.331206	0.276072	0.694444	0.325081
Com_3244_neg	Setileuton	C22 H17 F4 N3 O4	463.118	6.977	Full match	No results	No results	142296	222551	426688	449786	220120	1.17542e+06	219093	585113	324336	571738	212666	187803	1.2552	0.327917	0.825014	0.555556	0.132877
Com_2084_neg	Cefalochromin	C28 H22 O10	518.121	10.099	Full match	No results	No results	967670	650157	866372	1.03955e+06	1.01266e+06	1.00186e+06	960154	599024	647197	836113	578352	813698	1.24889	0.320652	0.0680753	0.888889	0.34849
Com_888_neg	Indene	C9 H8	116.062	9.437	Full match	No results	No results	2.31119e+06	1.51542e+06	2.28153e+06	1.73837e+06	2.65145e+06	1.67926e+06	2.39692e+06	1.50086e+06	714083	1.86617e+06	1.57163e+06	1.71387e+06	1.24722	0.31871	0.207587	0.694444	0.369458
Com_825_neg	3-Methylbutanoic acid	C5 H10 O2	102.068	1.959	Full match	No results	No results	3.8952e+06	1.72353e+06	3.61106e+06	3.15385e+06	2.82379e+06	3.44026e+06	2.56521e+06	2.32655e+06	2.26452e+06	3.3812e+06	2.19178e+06	2.22612e+06	1.24689	0.318332	0.184702	0.777778	0.309586
Com_1016_neg	2-Methyl-2-propanyl benzyl(4,5-dichlorohexyl)carbamate	C18 H27 Cl2 N O2	359.143	9.455	Full match	No results	No results	4.02867e+06	3.65301e+06	4.16457e+06	4.91578e+06	4.64298e+06	1.92018e+07	7.47932e+06	4.53252e+06	5.33931e+06	5.46075e+06	5.09418e+06	4.66344e+06	1.24677	0.3182	0.935449	0.75	0.295522
Com_19_neg	D-(-)-Fructose	C6 H12 O6	90.0314	1.744	No match	Invalid mass	No results	1210348065	8.45193e+08	8.68258e+08	1246765504	9.97462e+08	1093679521	8.54773e+08	6.04926e+08	5.98166e+08	7.99619e+08	7.12468e+08	1472117377	1.24189	0.312539	0.132377	0.805556	0.35655
Com_2436_neg	Trioxsalen	C14 H12 O3	228.079	10.188	Full match	No results	No results	253082	171711	225491	268630	255317	261572	204703	239912	153282	227050	144129	188106	1.24078	0.311242	0.0697523	0.833333	0.318917
Com_3116_neg	acrovestone	C32 H42 O8	554.29	13.45	Full match	No results	No results	300179	216534	280002	315915	313774	347536	191246	113033	134779	166077	161814	668347	1.23594	0.305609	0.17557	0.833333	0.563247
Com_633_neg	3-sulfolactic acid	C3 H6 O6 S	169.988	1.182	Full match	No results	No results	4.29161e+07	1.5596e+07	2.28595e+07	5.38325e+07	5.62065e+07	3.22597e+07	1.94812e+07	2.27559e+07	2.52281e+07	4.95036e+07	3.62121e+07	2.7833e+07	1.23565	0.305274	0.526773	0.638889	0.415141
Com_2419_neg	briaexcavatin Q	C26 H37 Cl O11	560.201	8.65	Full match	No results	No results	2.13947e+06	1.54566e+06	2.9255e+06	2.71641e+06	2.0277e+06	2.5064e+06	1.67625e+06	1.37704e+06	1.52269e+06	1.91417e+06	2.26301e+06	2.5513e+06	1.22617	0.294153	0.159443	0.75	0.282466
Com_3049_neg	7-Methyl-3-methyleneoctyl 4-methylbenzenesulfonate	C17 H26 O3 S	310.162	8.186	Full match	No results	No results	614198	407620	352169	594416	380360	421552	427482	193973	309436	493803	373222	463511	1.22503	0.292817	0.223223	0.638889	0.323291
Com_1532_neg	1-O-(indol-3-ylacetyl)-beta-D-glucose	C16 H19 N O7	337.115	8.355	Full match	No results	No results	1.67374e+06	1.13096e+06	1.05945e+06	1.13505e+06	1.38001e+06	1.2857e+06	1.41908e+06	750292	979332	1.23722e+06	862749	1.02597e+06	1.22157	0.288732	0.105629	0.777778	0.305732
Com_1461_neg	yatein	C22 H24 O7	400.151	10.426	Full match	No results	No results	1.13578e+06	1.5142e+06	509299	417244	652101	2.0076e+06	495894	1.11464e+06	740153	1.29727e+06	969827	537641	1.20964	0.274578	0.770814	0.555556	0.2322
Com_1685_neg	L-(+)-Tartaric acid	C4 H6 O6	150.016	15.015	Full match	Full match	No results	1.57501e+06	1.41457e+06	1.72894e+06	3.10024e+06	1.78071e+06	2.56433e+06	2.1649e+06	2.4307e+06	1.24547e+06	1.49898e+06	1.28527e+06	1.4479e+06	1.20754	0.272069	0.30516	0.722222	0.294981
Com_2158_neg	(3R)-3-(3,4-dimethoxyphenyl)-8-hydroxy-3,4-dihydroisochromen-1-one	C17 H16 O5	300.096	7.852	No match	No results	Invalid mass	6.44631e+06	3.42529e+06	2.59041e+06	4.62245e+06	2.31328e+06	4.33148e+06	5.30388e+06	1.7455e+06	2.23058e+06	2.94306e+06	4.46418e+06	2.96733e+06	1.20732	0.271803	0.410095	0.638889	0.319682
Com_756_neg	5-amino-6-(5-phospho-D-ribitylamino)uracil	C9 H17 N4 O9 P	356.073	5.859	Full match	No results	No results	877240	619709	826459	899788	999579	839130	900196	563820	501764	673821	729872	824835	1.20685	0.271248	0.110926	0.777778	0.300894
Com_4_neg	D-(-)-Quinic acid	C7 H12 O6	192.062	1.501	Full match	Full match	Full match	66315880651	48929511936	42161682840	52091355573	51085042456	42851889592	30417401615	12156247742	56043721285	49568564883	34650273247	68771978860	1.20598	0.27021	0.28549	0.611111	0.419258
Com_3533_neg	Rebimastat	C23 H41 N5 O5 S	499.284	11.74	Full match	No results	No results	693397	360207	578818	640864	1.39357e+06	424812	672063	306933	615820	769350	673538	371190	1.20029	0.263387	0.595961	0.472222	0.35329
Com_2268_neg	DE1625000	C7 H6 N2 O	134.048	7.478	Full match	No results	No results	1.02872e+06	770918	715291	1.26263e+06	951548	1.41658e+06	1.18352e+06	675758	706033	964327	472709	1.14653e+06	1.1936	0.255317	0.305455	0.694444	0.341913
Com_5202_neg	Cinnamtannin A4	C90 H74 O36	1730.39	10.503	Full match	No results	No results	94483.1	60182.9	78922	95046.1	95673.8	91125.6	53573.4	36625.3	139945	55034.7	96914.1	50285.8	1.19209	0.253491	0.251701	0.666667	0.376477
Com_29_neg	Ethyl myristate	C16 H32 O2	256.239	14.619	Partial match	Full match	No results	3842172477	2628135659	3769471451	6464973096	3632290363	6906018484	5482293531	3720024804	3167619066	3770707841	3531500729	3283046212	1.18679	0.247068	0.47102	0.666667	0.324383
Com_823_neg	Dimethyl 1,4-cyclohexanedicarboxylate	C10 H16 O4	200.104	6.812	Full match	No results	No results	1.01124e+07	8.18496e+06	5.07673e+06	5.8594e+06	3.37537e+07	6.18165e+06	2.62687e+06	1.86355e+07	8.69468e+06	1.62542e+07	7.22684e+06	5.13887e+06	1.18082	0.239789	0.785007	0.5	0.15788
Com_901_neg	2-{[(2,6-Diisopropylphenyl)sulfanyl]methyl}tetrahydrofuran	C17 H26 O S	278.172	10.367	Full match	No results	No results	3.88725e+07	1.55484e+07	5.22739e+07	2.34006e+07	2.27044e+07	2.94426e+07	1.85017e+07	3.25583e+07	1.3211e+07	3.13321e+07	3.05355e+07	2.84673e+07	1.17876	0.237264	0.564826	0.444444	0.187444
Com_2536_neg	aspeverin	C22 H24 N4 O2	376.192	9.632	Full match	No results	No results	876114	817330	332739	873268	620199	796913	739309	206362	454715	555446	738087	981124	1.17456	0.232122	0.444256	0.666667	0.326711
Com_2290_neg	bielschowskysin	C22 H26 O9	434.157	8.618	Full match	No results	No results	830429	530074	493268	322095	476441	444372	666782	390870	429756	382943	328780	445883	1.17076	0.227447	0.391595	0.694444	0.194298
Com_2452_neg	2,4,6-Tris[(4-methoxybenzyl)oxy]-1,3,5-cyclohexanetriol	C30 H36 O9	540.235	9.671	Full match	No results	No results	3.81931e+06	2.96669e+06	4.02737e+06	1.72887e+06	4.4314e+06	3.93614e+06	3.57404e+06	1.81953e+06	3.53561e+06	4.32681e+06	3.88176e+06	797228	1.16587	0.221401	0.434661	0.638889	0.342825
Com_5279_neg	Egualen	C15 H18 O3 S	278.099	9.652	Full match	No results	No results	207571	150292	184942	324742	204963	194989	234260	155953	164126	203372	141130	193875	1.15995	0.214066	0.322889	0.666667	0.259322
Com_3031_neg	Vernodalol	C20 H24 O8	392.146	7.999	Full match	No results	No results	954954	1.76016e+06	578761	717093	797367	761242	910135	501877	883253	898405	857335	755514	1.15876	0.212576	0.604186	0.5	0.207366
Com_822_neg	glutaral	C5 H8 O2	100.052	6.81	Full match	No results	No results	1.2231e+07	9.89975e+06	6.14033e+06	7.08697e+06	3.37537e+07	7.47674e+06	2.62687e+06	1.86355e+07	1.05163e+07	1.96595e+07	8.74089e+06	6.21549e+06	1.15354	0.206063	0.719895	0.5	0.209847
Com_5192_neg	Fluorescein	C20 H12 O5	332.069	13.639	Full match	No results	No results	399031	137506	289466	304504	271703	193382	371892	81291.7	136476	235076	123143	437281	1.15192	0.20404	0.422551	0.638889	0.454217
Com_1169_neg	Ononin	C22 H22 O9	430.125	10.902	Full match	No results	No results	3.16103e+06	2.76667e+06	3.23764e+06	5.26882e+06	1.33339e+06	6.72832e+06	1.43676e+06	5.46227e+06	1.91749e+06	5.66326e+06	3.77405e+06	1.28992e+06	1.15105	0.202952	0.595629	0.555556	0.273355
Com_4397_neg	(+)-gliodaclin C	C22 H16 N4 O3	384.124	6.08	Full match	No results	No results	703115	343506	500819	370961	339542	519590	570398	348223	398056	452875	450673	200405	1.14744	0.198422	0.447295	0.555556	0.229205
Com_184_neg	Phenol	C6 H6 O	94.0416	1.295	Full match	No results	No results	8.51778e+08	5.16768e+08	8.14523e+08	8.83965e+08	7.92051e+08	8.53213e+08	9.54958e+08	5.77876e+08	5.74196e+08	768639515	6.19361e+08	6.3035e+08	1.14227	0.191903	0.269633	0.694444	0.264611
Com_886_neg	2-(6-Amino-3-imino-3H-xanthen-9-yl)benzoic acid	C20 H14 N2 O3	330.102	1.463	Full match	No results	No results	7.85766e+06	4.81253e+06	7.32508e+06	7.0884e+06	1.25402e+07	5.67889e+06	9.80346e+06	5.13215e+06	6.02482e+06	6.42911e+06	6.03003e+06	6.47968e+06	1.13543	0.183238	0.543698	0.611111	0.262665
Com_540_neg	4-Toluic acid	C8 H8 O2	136.052	8.922	Partial match	Full match	No results	2.66732e+07	1.83827e+07	1.75523e+07	2.72853e+07	1.32887e+07	3.84738e+07	1.5081e+07	2.05871e+07	1.48997e+07	3.74917e+07	2.1584e+07	1.53573e+07	1.13324	0.180455	0.578292	0.611111	0.18405
Com_1851_neg	grandidentatin	C21 H28 O9	424.173	8.487	Full match	No results	No results	3.30881e+06	6.02113e+06	1.06853e+07	3.41304e+06	6.27727e+06	4.20742e+06	9.36636e+06	4.63688e+06	4.13002e+06	5.6487e+06	2.88925e+06	3.258e+06	1.13311	0.180285	0.653021	0.638889	0.195124
Com_3155_neg	Nostocyclopeptide A3	C41 H56 N8 O9	804.414	12.272	Full match	No results	No results	652157	457471	499010	435862	402982	428134	653093	834061	371630	222454	218818	242012	1.13121	0.177869	0.339797	0.666667	0.35115
Com_128_neg	FG7175000	C9 H7 N O	145.052	5.783	Full match	No results	No results	9.66279e+07	1.56898e+08	1.13811e+08	6.68805e+07	1.72367e+07	1.79094e+08	4.63823e+07	1.86827e+08	3.74098e+07	2.31686e+08	2.31317e+07	3.22739e+07	1.1306	0.17709	0.571786	0.555556	0.625941
Com_774_neg	casearin U	C28 H42 O8	506.286	12.879	Full match	No results	No results	1.98499e+06	1.97748e+06	5.04267e+06	4.12342e+06	3.06088e+06	1.93796e+06	1.08617e+06	1.49211e+06	1.53696e+06	3.35295e+06	5.48302e+06	3.10096e+06	1.12928	0.175404	0.518877	0.611111	0.301057
Com_2135_neg	17beta-Hydroxy-7alpha-mercaptoandrost-4-en-3-one 7-propionate	C22 H32 O3 S	376.209	11.355	Full match	No results	No results	5.02225e+06	2.65099e+06	5.36338e+06	6.39808e+06	6.11159e+06	3.275e+06	5.575e+06	2.97e+06	3.29678e+06	3.60847e+06	6.58849e+06	3.4961e+06	1.1287	0.174667	0.564544	0.527778	0.279563
Com_2304_neg	excavatoid A	C21 H34 O9	430.219	8.18	Full match	No results	No results	3.5934e+06	2.33232e+06	3.73575e+06	1.98397e+06	2.63957e+06	2.773e+06	3.84245e+06	1.87885e+06	1.67823e+06	2.36788e+06	2.89543e+06	2.51873e+06	1.1236	0.168128	0.431925	0.611111	0.180069
Com_4983_neg	Fomepizole	C4 H6 N2	82.0528	3.752	Full match	No results	No results	457376	283759	506770	592280	580936	552324	427546	339427	277562	766039	470433	384875	1.11537	0.157522	0.475791	0.694444	0.286806
Com_836_neg	6-[(2R,5S,6S)-5-Hydroxy-6-methyl-2-piperidinyl]hexanoic acid	C12 H23 N O3	229.167	9.897	Invalid mass	No results	No results	1.34673e+07	1.03068e+07	7.81841e+06	9.13319e+06	1.82819e+07	8.3706e+06	1.4187e+07	8.5884e+06	1.07164e+07	8.62021e+06	7.7266e+06	1.05934e+07	1.11494	0.15697	0.615893	0.527778	0.17669
Com_338_neg	Robustaol A	C25 H30 O9	474.188	8.729	Full match	No results	No results	5.57005e+07	4.17062e+07	1.1666e+07	4.78575e+07	3.44795e+08	3.97894e+07	7.40984e+07	3.91327e+07	1.83862e+08	7.11032e+07	5.97493e+07	5.77631e+07	1.1149	0.156911	0.520842	0.722222	0.7423
Com_481_neg	Hex-1-enylbenzene	C12 H16	160.125	9.195	Full match	No results	No results	2.13495e+07	1.62229e+07	1.19098e+07	1.4048e+07	1.25e+07	1.68444e+07	1.70266e+07	1.04231e+07	1.5632e+07	1.20822e+07	1.60208e+07	1.2357e+07	1.11171	0.152786	0.413622	0.638889	0.142918
Com_2435_neg	Tolciclate	C20 H21 N O S	323.136	8.911	Full match	No results	No results	935463	645173	835767	982730	918502	894941	732665	720125	489988	1.15071e+06	1.01949e+06	605315	1.10476	0.143733	0.385764	0.611111	0.21527
Com_2560_neg	2,9-Dihydroxy-1-methoxydibenzo[cd,f]indol-4(5H)-one	C16 H11 N O4	281.068	11.81	Full match	No results	No results	852954	600464	1.07554e+06	1.21203e+06	885792	1.25965e+06	1.09692e+06	906480	388988	2.04658e+06	372738	520002	1.10404	0.142794	0.403907	0.638889	0.416688
Com_2504_neg	Ophiopogonin B	C39 H62 O12	722.423	13.986	Full match	No results	No results	2.21716e+06	1.12509e+06	1.42014e+06	1.41573e+06	1.50368e+06	1.12527e+06	1.74007e+06	1.89088e+06	840548	1.21195e+06	954109	1.34422e+06	1.1034	0.141954	0.510732	0.611111	0.177182
Com_6022_neg	cercosporin	C29 H26 O10	534.154	7.52	Full match	No results	No results	95621.6	69213.1	91455	122174	97522.7	96368.4	126270	143863	79877.4	60806.1	51812.3	56120.3	1.10334	0.141874	0.417235	0.638889	0.266619
Com_228_neg	Asiatic acid ?汽?擧	C30 H48 O5	488.349	13.038	Full match	No results	Full match	7.84968e+07	2.95682e+07	8.49011e+07	8.56721e+07	215250770	2.87674e+07	3.11755e+07	4.71439e+07	4.07925e+07	9.13366e+07	2.15692e+08	5.00053e+07	1.09768	0.134459	0.826402	0.472222	0.248013
Com_67_neg	Biacetyl	C4 H6 O2	86.0365	1.418	Full match	No results	No results	1263025486	6.72768e+08	8.47768e+08	1005378103	9.83805e+08	1094341432	1460879043	7.99056e+08	7.67434e+08	6.36901e+08	8.67769e+08	8.15033e+08	1.09725	0.133895	0.466986	0.694444	0.265312
Com_769_neg	3-[3-(4-Fluorophenyl)propyl]-1,1,1,3,5,5,5-heptamethyltrisiloxane	C16 H31 F O2 Si3	358.161	8.346	Full match	No results	No results	1.48417e+07	1.76409e+07	1.09379e+07	1.88712e+07	2.21281e+07	1.49864e+07	2.02683e+07	1.25637e+07	1.48078e+07	1.67084e+07	1.06851e+07	1.56551e+07	1.09613	0.132417	0.526584	0.638889	0.170488
Com_4530_neg	halopemide	C21 H22 Cl F N4 O2	416.144	7.789	Full match	No results	No results	234372	162275	439348	245070	287551	231990	353830	163236	319621	236460	136549	251315	1.09555	0.13165	0.630988	0.5	0.176581
Com_2132_neg	Glutaurine	C7 H14 N2 O6 S	254.056	12.19	Full match	No results	No results	1.27794e+06	1.10276e+06	1.18591e+06	1.23256e+06	1.51198e+06	1.60848e+06	1.27383e+06	1.06487e+06	975430	1.30075e+06	1.40154e+06	1.23909e+06	1.09153	0.126354	0.315507	0.388889	0.151523
Com_710_neg	(3R,4S,5R)-5-Methoxy-6,6-dimethyltetrahydro-2H-pyran-2,3,4-triol	C8 H16 O5	192.099	1.374	Full match	No results	No results	1.00751e+07	7.99194e+06	1.1667e+07	1.58832e+07	1.20405e+07	1.03732e+07	1.92877e+07	9.11973e+06	9.77022e+06	6.83259e+06	8.29077e+06	9.11997e+06	1.08987	0.12416	0.49136	0.722222	0.266076
Com_5807_neg	2-(4-Chlorophenyl)-N'-[(2,4-dimethoxybenzoyl)oxy]ethanimidamide	C17 H17 Cl N2 O4	348.086	12.848	Full match	No results	No results	133895	158458	211284	490881	135488	313118	302780	208466	215704	211502	122358	263412	1.08979	0.12405	0.996963	0.527778	0.195238
Com_484_neg	IN00458	C9 H6 O3	162.031	1.403	Full match	No results	No results	1.08664e+07	6.55949e+06	1.02624e+07	1.1626e+07	9.39465e+06	1.08758e+07	1.3711e+07	7.977e+06	7.52701e+06	9.56227e+06	7.91374e+06	8.02565e+06	1.08897	0.122963	0.479803	0.666667	0.242118
Com_2989_neg	1-O-acetyl-alpha-maltose	C14 H24 O12	384.125	5.162	Full match	No results	No results	464451	338453	721830	221099	545931	167364	398395	290526	484335	464571	325301	301763	1.08576	0.118704	0.94297	0.527778	0.112288
Com_2807_neg	acetylglutamate	C7 H9 N O5	187.049	8.107	Invalid mass	No results	No results	208033	253706	599806	284431	187578	562295	222943	429898	250538	541548	331642	156541	1.08419	0.116611	0.840684	0.444444	0.136192
Com_2993_neg	Ablukast	C28 H34 O8	498.228	14.776	Full match	No results	No results	752932	934581	1.94871e+06	2.72761e+06	1.78895e+06	1.99305e+06	1.78443e+06	2.11155e+06	1.4278e+06	1.79625e+06	1.01128e+06	1.24251e+06	1.08236	0.114178	0.947851	0.555556	0.20175
Com_620_neg	tectorigenin	C16 H12 O6	300.062	6.974	Partial match	No results	Full match	6.30957e+06	4.87002e+06	1.17241e+07	1.39997e+07	5.49453e+06	2.04615e+07	7.5852e+06	1.49682e+07	1.0133e+07	1.35576e+07	5.83818e+06	6.03631e+06	1.08157	0.113132	0.986092	0.472222	0.162959
Com_5782_neg	5,6,7-Trimethoxy-2H-chromen-2-one	C12 H12 O5	236.07	11.812	Full match	No results	No results	246458	91296.8	451524	140198	141848	459723	466646	59589.9	183465	295046	108956	302758	1.0809	0.112229	0.805504	0.5	0.345315
Com_1030_neg	Diethyl [1-(benzyloxy)-5-hydroxy-2-oxo-3-pyrrolidinyl]phosphonate	C15 H22 N O6 P	343.119	7.953	Full match	No results	No results	7.13726e+06	7.42812e+06	2.8044e+07	7.87367e+06	929202	1.15742e+07	1.66055e+06	5.71541e+06	7.26236e+06	2.41588e+07	1.21919e+07	7.42372e+06	1.0783	0.108759	0.960104	0.555556	0.585818
Com_1580_neg	10-Hydroxydecanoic acid	C10 H20 O3	188.14	8.618	Full match	No results	No results	3.54476e+06	2.77433e+06	2.30871e+06	3.77393e+06	5.56711e+06	3.83994e+06	4.20129e+06	3.76882e+06	2.68475e+06	3.39216e+06	2.39985e+06	3.78249e+06	1.07808	0.108459	0.721557	0.555556	0.238992
Com_149_neg	Phenylacetylene	C8 H6	102.047	9.44	Full match	No results	No results	2.24999e+07	8.83742e+06	1.74556e+07	1.22151e+07	1.1907e+07	1.10104e+07	2.22043e+07	8.96339e+06	8.73901e+06	1.32274e+07	1.10333e+07	1.45779e+07	1.06578	0.0919137	0.739894	0.444444	0.193425
Com_445_neg	Lactobionic acid	C12 H22 O12	358.11	1.384	Full match	No results	No results	9.91751e+06	5.98667e+06	9.41164e+06	9.02198e+06	8.73952e+06	9.92602e+06	1.24146e+07	7.2804e+06	6.8697e+06	8.72723e+06	7.26532e+06	7.25175e+06	1.06413	0.0896771	0.567204	0.694444	0.215242
Com_2377_neg	3,4-Bis({[(2-methyl-2-propanyl)oxy]carbonyl}amino)benzoic acid	C17 H24 N2 O6	352.162	7.124	Full match	No results	No results	2.191e+06	2.06966e+06	1.48663e+06	3.01952e+06	3.70319e+06	1.52294e+06	1.78414e+06	1.76682e+06	2.45249e+06	3.23779e+06	2.93568e+06	975451	1.06391	0.0893769	0.743243	0.527778	0.179184
Com_382_neg	2-(3-CARBOXYPROPIONYL)-6-HYDROXY-CYCLOHEXA-2,4-DIENE CARBOXYLIC ACID	C11 H12 O6	240.063	8.326	Full match	No results	No results	1.44143e+06	984394	1.32429e+06	1.17667e+06	1.11088e+06	1.15823e+06	1.11488e+06	1.09041e+06	2.34052e+06	920064	620665	704602	1.0596	0.0835208	0.475305	0.75	0.206606
Com_4220_neg	Bambuterol	C18 H29 N3 O5	367.209	14.818	Full match	No results	No results	155651	96035.2	191137	220656	144042	493111	249183	199034	120840	271152	243449	144629	1.0589	0.0825635	0.879607	0.611111	0.341722
Com_669_neg	FLUMEZAPINE	C17 H19 F N4 S	330.13	8.023	Full match	No results	No results	1.2736e+07	9.30321e+06	1.90699e+07	1.2135e+06	9.99195e+06	12853279	1.20724e+07	6.09062e+06	1.01147e+07	1.42247e+07	7.68783e+06	1.1464e+07	1.05699	0.0799575	0.712781	0.555556	0.290338
Com_3002_neg	cholic acid	C24 H40 O5	408.286	12.601	Full match	No results	No results	386281	251445	343359	393934	369342	456425	541022	215630	321864	377267	411814	215692	1.0564	0.0791561	0.596654	0.583333	0.284166
Com_550_neg	Picloxydine	C20 H24 Cl2 N10	474.157	1.393	Full match	No results	No results	1.4543e+07	8.77953e+06	1.36786e+07	1.33336e+07	1.26909e+07	1.43074e+07	1.83515e+07	1.06768e+07	1.00745e+07	1.27986e+07	1.06918e+07	1.07419e+07	1.05452	0.0765809	0.612336	0.666667	0.211817
Com_34_neg	Alpha-Linolenic acid	C18 H30 O2	278.224	14.172	Full match	No results	No results	1.8293e+08	1.09173e+08	1.64254e+08	3.35632e+08	1.80264e+08	3.03676e+08	2.63898e+08	3.20372e+08	1.43857e+08	1.87135e+08	151999204	1.43608e+08	1.05373	0.0755056	0.886653	0.555556	0.323052
Com_291_neg	2-Acetyl-3,5-dihydroxy-4-methylphenyl D-allopyranoside	C15 H20 O9	344.109	7.972	Full match	No results	No results	6.87127e+07	7.97253e+07	2.95519e+08	7.70018e+07	3.95447e+06	1.09768e+08	2.07575e+07	6.71358e+07	8.03362e+07	2.47694e+08	1.38406e+08	4.86526e+07	1.05257	0.0739147	0.771026	0.527778	0.719466
Com_3097_neg	methyl eugenol	C11 H14 O2	178.099	7.638	Full match	No results	No results	458794	242818	445956	519715	351242	373707	576250	227217	251713	406481	463853	348331	1.05206	0.0732236	0.692325	0.555556	0.261324
Com_1771_neg	Naldemedine	C32 H34 N4 O6	570.245	10.889	Full match	No results	No results	3.1822e+06	3.74405e+06	1.18769e+07	2.31374e+06	5.67033e+06	3.84401e+06	1.2396e+07	4.65999e+06	2.9681e+06	3.94046e+06	1.67108e+06	3.49804e+06	1.0514	0.0723182	0.787052	0.527778	0.134389
Com_2055_neg	amphidinolide B6	C32 H52 O7	548.369	14.073	Full match	No results	No results	1.00332e+06	397908	625846	1.0268e+06	5.72529e+06	1.16762e+06	1.62392e+06	2.60463e+06	1.15226e+06	1.27797e+06	2.31985e+06	499170	1.04948	0.069679	0.601775	0.694444	0.72376
Com_2785_neg	(+)-Ingenol	C20 H28 O5	348.192	10.578	Full match	No results	No results	1.5197e+06	613870	2.98772e+06	1.40379e+06	2.24504e+06	938070	1.32452e+06	2.79961e+06	982018	2.40472e+06	974407	838926	1.04118	0.0582232	0.941738	0.527778	0.150011
Com_1153_neg	Setipiprant	C24 H19 F N2 O3	402.138	1.398	Full match	No results	No results	7.31213e+06	4.41394e+06	6.89815e+06	6.47814e+06	6.32175e+06	6.88516e+06	9.22627e+06	5.3678e+06	5.065e+06	6.43454e+06	5.32523e+06	5.40053e+06	1.04046	0.0572284	0.68083	0.666667	0.198373
Com_1990_neg	Izonsteride	C24 H26 N2 O S2	422.148	12.086	Full match	No results	No results	3.14609e+06	1.76954e+06	2.94049e+06	3.15748e+06	4.29184e+06	2.53605e+06	2.3199e+06	3.4395e+06	5.0078e+06	2.89069e+06	1.75964e+06	1.77257e+06	1.03789	0.0536587	0.724954	0.583333	0.180433
Com_2322_neg	Cucurbitacin F	C30 H46 O7	518.322	10.379	Full match	No results	No results	3.36522e+06	1.89987e+06	514965	1.94611e+06	3.64898e+06	543804	1.93761e+06	938891	4.84952e+06	1.74914e+06	464745	1.56843e+06	1.03568	0.0505771	0.966636	0.583333	0.235757
Com_971_neg	Monoxerutin	C29 H34 O17	654.178	9.613	Full match	No results	No results	2.60072e+06	1.31238e+06	1.28113e+06	4.49279e+06	4.95486e+06	2.76593e+06	1.79975e+06	2.27987e+06	4.37243e+06	5.14837e+06	1.1276e+06	2.09213e+06	1.03494	0.0495435	0.917419	0.555556	0.431424
Com_5036_neg	N~6~-(Trifluoroacetyl)lysine	C8 H13 F3 N2 O3	242.088	3.861	Full match	No results	No results	217673	150409	204089	212498	213204	204869	214901	222359	134304	200018	181041	209948	1.03455	0.0490068	0.684125	0.555556	0.122293
Com_153_neg	trans-Cinnamic acid	C9 H8 O2	148.052	9.439	Full match	Full match	No results	1.95099e+07	7.12844e+06	1.46838e+07	1.03399e+07	9.03863e+06	9.11942e+06	1.91128e+07	7.57056e+06	7.82912e+06	1.10226e+07	9.17861e+06	1.30073e+07	1.031	0.0440385	0.903551	0.5	0.180997
Com_453_neg	[(6-Bromohexyl)oxy](2-methyl-2-propanyl)diphenylsilane	C22 H31 Br O Si	418.131	1.374	Full match	No results	No results	1.22784e+07	7.49571e+06	1.14845e+07	1.25052e+07	1.08279e+07	1.2217e+07	1.54638e+07	9.15322e+06	8.72702e+06	1.05785e+07	9.84286e+06	1.14435e+07	1.02453	0.0349683	0.809131	0.666667	0.203686
Com_3328_neg	hexamidine	C20 H26 N4 O2	354.204	13.801	Full match	No results	No results	861585	718580	1.28627e+06	639766	1.16688e+06	836295	764848	568881	911439	890289	875645	1.37374e+06	1.02313	0.0329834	0.873657	0.555556	0.0408098
Com_1420_neg	Homovanillic acid	C9 H10 O4	182.061	9.774	No match	Invalid mass	No results	1.06887e+06	1.23534e+06	2.1796e+06	1.05507e+06	1.09362e+06	1.30517e+06	2.59934e+06	1.25739e+06	977180	1.25634e+06	614395	1.10613e+06	1.01625	0.0232515	0.736673	0.472222	0.104906
Com_923_neg	(1S)-1,5-Anhydro-1-benzyl-D-galactitol	C13 H18 O5	254.115	9.896	Full match	No results	No results	941913	674189	1.29433e+06	489564	541733	569143	1.051e+06	617988	661089	950824	595550	563325	1.01601	0.0229213	0.931722	0.583333	0.0672378
Com_2674_neg	Droxidopa	C9 H11 N O5	213.063	7.575	Full match	No results	No results	696946	699940	750832	837617	163132	1.09216e+06	263990	434697	772259	1.65823e+06	702065	346962	1.01494	0.021394	0.858269	0.555556	0.229823
Com_470_neg	Benzoic acid	C7 H6 O2	122.036	2.166	Full match	Full match	Full match	5.28167e+07	2.75119e+07	4.8803e+07	4.93209e+07	5.57977e+07	4.24582e+07	5.83593e+07	3.34756e+07	3.84628e+07	6.80857e+07	3.83985e+07	3.63073e+07	1.01325	0.0189946	0.877709	0.555556	0.255846
Com_1041_neg	Ceftolozane	C23 H30 N12 O8 S2	666.177	7.615	Full match	No results	No results	2.00052e+06	1.78092e+06	1.06615e+06	3.9469e+06	3.69708e+06	2.53128e+06	1.07954e+06	2.12726e+06	3.2946e+06	6.12524e+06	915450	1.30943e+06	1.01154	0.0165484	0.677829	0.583333	0.308988
Com_3906_neg	taurolithocholic acid sulfate	C26 H45 N O8 S2	563.259	11.907	Full match	No results	No results	400807	198027	251772	378774	1.41961e+06	273350	278167	824111	600043	229374	240262	718869	1.0109	0.0156408	0.787884	0.555556	0.30087
Com_83_neg	Aurantio-obtusin beta-D-glucoside	C23 H24 O12	492.125	10.104	Full match	No results	No results	2.24955e+06	1.03466e+06	3.29115e+06	2.02356e+06	1.44113e+06	1.7752e+06	3.74601e+06	1.63952e+06	1.56249e+06	1.64326e+06	1.88405e+06	1.25888e+06	1.00691	0.00992783	0.965866	0.555556	0.203129
Com_195_neg	Indole-3-carbidol	C9 H9 N O	147.068	7.594	Full match	No results	No results	8.88516e+07	7.65696e+07	1.16988e+08	6.12804e+07	2.72606e+06	1.83146e+08	2.52216e+07	7.90048e+07	113029755	1.84982e+08	7.7244e+07	4.69523e+07	1.00594	0.00854563	0.667079	0.5	0.642934
Com_739_neg	(+)-varitriol	C15 H20 O5	280.13	7.818	Full match	No results	No results	7.4976e+06	5.94539e+06	6.0179e+06	6.77873e+06	7.17721e+06	5.6977e+06	5.81409e+06	5.7348e+06	5.71149e+06	8.96983e+06	5.38491e+06	7.52455e+06	0.999358	-0.000926847	0.902403	0.583333	0.050756
Com_748_neg	prifelone	C19 H24 O2 S	316.151	1.441	Full match	No results	No results	1.2908e+07	7.51415e+06	1.07577e+07	1.08133e+07	9.6602e+06	1.14004e+07	1.61115e+07	8769356	8.89063e+06	1.07062e+07	9.62893e+06	9.88796e+06	0.985299	-0.0213665	0.967281	0.638889	0.194106
Com_91_neg	1-O-[(2-Oxo-2,3-dihydro-1H-indol-3-yl)acetyl]-beta-D-glucopyranose	C16 H19 N O8	353.11	7.597	Full match	No results	No results	2.40962e+08	2.22747e+08	458926904	2.1875e+08	1.52561e+07	4.85545e+08	7.79567e+07	233836986	3.54321e+08	5.90889e+08	2.65055e+08	1.47194e+08	0.983786	-0.0235841	0.72165	0.527778	0.544002
Com_1515_neg	lobechidine A	C14 H27 N O3	257.198	13.07	Full match	No results	No results	1.96754e+06	783512	1.06606e+06	1.25465e+06	525412	687124	1.27162e+06	588410	1.71319e+06	953793	852301	1.09716e+06	0.970329	-0.0434544	0.775198	0.583333	0.127111
Com_5355_neg	MFCD00888473	C24 H42 O7 P2	504.239	9.523	Full match	No results	No results	157290	177219	140535	235468	211057	400528	519915	191775	182061	124280	128019	220786	0.967268	-0.0480118	0.900988	0.555556	0.304321
Com_174_neg	L-Threonic acid-1,4-lactone	C4 H6 O4	118.026	1.412	Not the top hit	Full match	No results	1.53097e+08	8.65637e+07	152337722	1.66127e+08	1.27036e+08	1.61637e+08	1.84251e+08	1.38213e+08	1.42822e+08	1.78879e+08	1.05636e+08	1.27258e+08	0.965497	-0.050657	0.769664	0.472222	0.226716
Com_112_neg	glicetanile	C23 H25 Cl N4 O4 S	488.13	8.63	Full match	No results	No results	4.84454e+07	3.94044e+07	2.25591e+07	8.67632e+07	5.83868e+07	1.00037e+08	1.43789e+07	8.16063e+07	7.75732e+07	132560724	3.13454e+07	3.31359e+07	0.959514	-0.0596249	0.822511	0.444444	0.187217
Com_965_neg	3,5-Dinitro-2-hydroxybenzoic acid	C7 H4 N2 O7	228.003	1.519	Full match	No results	No results	4.30293e+06	2.85102e+06	4.02231e+06	3.39391e+06	3.47761e+06	3.19095e+06	4.88002e+06	2.67659e+06	4.75718e+06	3.28619e+06	3.00841e+06	3.69506e+06	0.952262	-0.070569	0.783168	0.527778	0.113367
Com_747_neg	(+)-Aspicilin	C18 H32 O5	328.224	10.746	Full match	No results	No results	1.21723e+07	6.3657e+06	1.94031e+07	1.57877e+07	1.03019e+07	1.30511e+07	2.56993e+07	3.86985e+06	9.31347e+06	1.02162e+07	1.26734e+07	1.94853e+07	0.948611	-0.0761122	0.871804	0.527778	0.30945
Com_643_neg	aigialomycin F	C19 H26 O9	398.156	9.406	Full match	No results	No results	1.77344e+06	4.70387e+06	4.7119e+06	7.18868e+06	2.30892e+06	6.49882e+06	2.26959e+06	5.52721e+06	7.57581e+06	7.34351e+06	4.48733e+06	1.59583e+06	0.943969	-0.0831887	0.938954	0.527778	0.144257
Com_2922_neg	(4-Aminophenyl)(7-benzyl-3,7-diazabicyclo[3.3.1]non-3-yl)methanone	C21 H25 N3 O	335.201	10.731	Full match	No results	No results	1.22765e+06	1.15788e+06	1.29366e+06	1.59538e+06	1.46361e+06	1.42291e+06	1.76594e+06	983177	1.41848e+06	1.01707e+06	926887	2.53846e+06	0.943477	-0.0839412	0.972991	0.583333	0.114141
Com_4839_neg	rolitetracycline	C27 H33 N3 O8	527.229	11.485	Full match	No results	No results	495935	264693	352307	425066	384529	375728	451660	265845	373560	277296	491610	599827	0.934328	-0.0979986	0.793229	0.555556	0.184871
Com_2717_neg	Deoxycholic acid	C24 H40 O4	392.291	12.223	Full match	No results	No results	628948	437700	580442	702864	642658	638800	2.17299e+06	296390	342160	352346	346087	389241	0.931319	-0.102653	0.467206	0.833333	0.48819
Com_152_neg	2-hydroxyquinoline	C9 H7 N O	145.052	7.589	Partial match	No results	Full match	1.70915e+08	155740150	2.42764e+08	1.36208e+08	1.16361e+07	3.70497e+08	5.12424e+07	1.43372e+08	211741836	5.22051e+08	1.34738e+08	1.07017e+08	0.929581	-0.105347	0.757118	0.583333	0.475834
Com_1064_neg	Syringetin	C17 H14 O8	346.068	9.043	Full match	No results	No results	612013	422805	545109	643077	642853	591617	735990	599236	522827	702525	524452	639895	0.9282	-0.107493	0.407778	0.583333	0.21153
Com_77_neg	D-(+)-Galactose	C6 H12 O6	226.068	1.502	No match	Invalid mass	No results	199161620	234740762	2.42977e+08	3.34844e+07	7.32549e+07	2.00156e+08	8.99292e+07	8.79158e+07	1.90914e+08	3.97425e+08	1.50729e+08	1.51647e+08	0.920654	-0.119269	0.717246	0.555556	0.468942
Com_3865_neg	stellettin L	C30 H42 O4	466.307	14.268	Full match	No results	No results	382517	249347	337313	403850	376383	407571	283053	186529	184512	235714	1.2532e+06	219666	0.912941	-0.131406	0.55773	0.805556	0.291076
Com_910_neg	Neoandrographolide 劤?懃??焦	C26 H40 O8	480.271	11.758	Partial match	No results	Full match	4.08671e+06	2.47512e+06	3.21704e+06	1.01364e+07	1.69889e+07	1.59053e+06	7.44734e+06	3.97806e+06	1.20307e+07	9.07899e+06	7.72628e+06	1.92298e+06	0.912533	-0.132052	0.551989	0.583333	0.654642
Com_2410_neg	8-METHOXYKYNURENIC ACID	C11 H9 N O4	219.053	9.734	Full match	No results	No results	1.41757e+06	1.06148e+06	1.94885e+06	2.01775e+06	2.26166e+06	1.27254e+06	1.41014e+06	1.45167e+06	1.68651e+06	2.43624e+06	2.15666e+06	1.79535e+06	0.912521	-0.13207	0.491553	0.611111	0.202884
Com_173_neg	5-Hydroxyindole-3-acetic acid	C10 H9 N O3	191.058	7.579	Full match	Full match	No results	1.43336e+08	1.40895e+08	1.97435e+08	1.10409e+08	6.75041e+06	3.06276e+08	4.10735e+07	1.19082e+08	1.77217e+08	4.52207e+08	1.12908e+08	8.98472e+07	0.912093	-0.132747	0.711881	0.555556	0.573273
Com_661_neg	Prunin	C21 H22 O10	434.12	11.566	Full match	No results	No results	1.23582e+07	1.29931e+07	1.41809e+07	1.39786e+07	1.55632e+06	1.73786e+07	4.25071e+06	2.4012e+07	7.3015e+06	1.90108e+07	1.85353e+07	6.76818e+06	0.906949	-0.140907	0.80224	0.416667	0.420244
Com_977_neg	Carmine	C22 H20 O13	492.089	9.015	Full match	No results	No results	1.45305e+06	1.67514e+06	1.14484e+06	2.90343e+06	5.31857e+06	1.3458e+06	1.64644e+06	1.62676e+06	3.69122e+06	5.44112e+06	1.73403e+06	1.139e+06	0.905899	-0.142577	0.771556	0.583333	0.309842
Com_6001_neg	Chloramphenicol stearate	C29 H46 Cl2 N2 O6	588.276	11.952	Full match	No results	No results	103370	68916.8	88449.6	100391	332424	93688	122799	86964.4	282903	78095	76494.5	226119	0.901377	-0.149798	0.715268	0.5	0.322319
Com_234_neg	3-(5'-methylthio)pentylmalic acid	C10 H18 O5 S	250.087	8.855	Full match	No results	No results	2.80059e+06	1.30642e+06	2.9519e+06	2.8925e+06	1.67237e+06	2.16453e+06	3.20032e+06	1.9641e+06	1.45158e+06	2.96846e+06	3.17768e+06	2.6577e+06	0.894194	-0.161341	0.548375	0.666667	0.265183
Com_998_neg	1-oleoyl-sn-glycero-3-phosphoethanolamine	C23 H46 N O7 P	479.299	14.863	Full match	No results	No results	2.64213e+06	3.6484e+06	8.15694e+06	1.65432e+07	1.91279e+06	1.62439e+07	1.65374e+07	1.68519e+07	8.37076e+06	5.94837e+06	4.49289e+06	3.02402e+06	0.889944	-0.168214	0.601778	0.638889	0.448866
Com_2683_neg	GANODERONE A	C30 H46 O3	454.343	14.126	Full match	No results	No results	1.28243e+06	2.27445e+06	888533	1.47509e+06	3.93236e+06	1.31588e+06	2.68121e+06	1.82803e+06	1.62688e+06	1.97061e+06	2.08993e+06	2.3825e+06	0.887875	-0.171571	0.348354	0.722222	0.344223
Com_122_neg	sinapaldehyde glucoside	C17 H22 O9	370.125	9.439	Full match	No results	No results	2.02664e+07	5.75203e+06	1.54338e+07	1.07166e+07	7.11625e+06	7.59305e+06	2.5639e+07	9.88706e+06	8.60648e+06	1.28673e+07	7.03986e+06	1.14944e+07	0.885405	-0.175591	0.641222	0.583333	0.311757
Com_3045_neg	Prednicarbate	C27 H36 O8	488.241	11.491	Full match	No results	No results	1.21843e+06	624249	1.08565e+06	1.19865e+06	1.57182e+06	1.00249e+06	911905	1.30228e+06	2.12136e+06	1.42146e+06	1.0096e+06	827188	0.88247	-0.18038	0.579516	0.555556	0.251582
Com_2060_neg	Paraldehyde	C6 H12 O3	132.078	8.397	Full match	No results	No results	1.72624e+06	1.4586e+06	2.96124e+06	2.37837e+06	2.57389e+06	2.15711e+06	1.5599e+06	1.54087e+06	1.40879e+06	8.49546e+06	1.18908e+06	830498	0.88225	-0.18074	0.572664	0.777778	0.304025
Com_4788_neg	(4-Chloro-3-nitrophenyl)(4-phenyl-1-piperazinyl)methanone	C17 H16 Cl N3 O3	345.088	3.11	Full match	No results	No results	212462	167680	186607	204859	201905	199334	110234	262835	280046	260088	167837	256344	0.876971	-0.189399	0.608334	0.694444	0.118451
Com_1433_neg	(20S)-Protopanaxadiol	C30 H52 O3	460.39	14.21	Full match	No results	No results	1.17064e+07	10597415	9.11749e+06	7.86758e+06	1.47811e+07	1.02376e+07	1.75483e+07	1.27926e+07	1.09304e+07	1.11369e+07	9.09358e+06	1.26767e+07	0.86693	-0.206013	0.286601	0.694444	0.224241
Com_378_neg	MFCD00035791	C12 H22 O3	214.156	10.875	Full match	No results	No results	6.7801e+07	1.85367e+07	9.60316e+07	1.7446e+08	9.92142e+06	6.30974e+07	2.14909e+08	7.71267e+06	3.71674e+07	2.97526e+07	6.87088e+07	1.38531e+08	0.865265	-0.208786	0.944503	0.472222	0.490491
Com_797_neg	Lofepramine	C26 H27 Cl N2 O	418.182	8.364	Full match	No results	No results	1.05235e+07	2.67171e+07	3.00902e+07	1.25831e+07	3.25821e+07	3.22932e+07	3.59866e+07	1.96428e+07	2.52424e+07	3.39745e+07	2.182e+07	3.09159e+07	0.86399	-0.210914	0.379817	0.388889	0.2934
Com_1106_neg	5-[(6-O-Benzoyl-D-erythro-hexopyranosyl)oxy]-2-hydroxybenzoic acid	C20 H20 O10	420.104	8.088	Full match	No results	No results	3.86476e+06	3.32838e+06	6.9907e+06	4.01997e+06	2.46509e+06	5.13949e+06	4.39839e+06	4.07503e+06	4.06152e+06	9.91889e+06	3.74595e+06	3.6782e+06	0.863793	-0.211242	0.556696	0.611111	0.175594
Com_2031_neg	Aloin B	C21 H22 O9	418.125	9.596	Full match	No results	No results	862623	660652	809546	911344	912374	862096	1.12561e+06	852464	880103	1.16345e+06	700382	1.0934e+06	0.862988	-0.212587	0.188064	0.694444	0.250389
Com_2598_neg	kinamycin D	C22 H18 N2 O9	454.101	9.209	Full match	No results	No results	2.19553e+06	916480	1.18594e+06	1.80573e+06	2.59408e+06	2.69339e+06	1.85733e+06	2.26298e+06	1.64779e+06	2.43921e+06	2.08422e+06	2.91276e+06	0.862686	-0.213093	0.334528	0.611111	0.464758
Com_1181_neg	2-(alpha-D-mannosyl)-D-glyceric acid	C9 H16 O9	268.078	15.119	Full match	No results	No results	374551	2.15287e+06	264148	5.55267e+06	357917	7.44121e+06	3.6232e+06	5.60903e+06	206807	2.67532e+06	3.3433e+06	3.34269e+06	0.858674	-0.219818	0.449771	0.583333	0.91383
Com_564_neg	Ungeremine	C16 H12 N O3	266.081	7.424	Full match	No results	No results	3.14428e+06	1.73585e+06	4.74074e+06	2.46156e+06	1.58778e+06	2.56816e+06	3.59291e+06	2.24081e+06	3.04369e+06	2.54004e+06	3.23228e+06	4.46328e+06	0.849598	-0.235148	0.311311	0.666667	0.283743
Com_2498_neg	Benzyl 4-O-beta-D-glucopyranosyl-beta-D-glucopyranoside	C19 H28 O11	432.161	8.682	Full match	No results	No results	1.7773e+06	1.17936e+06	981183	1.93523e+06	1.04559e+06	517516	1.87451e+06	729484	1.40542e+06	1.67007e+06	1.1541e+06	1.92217e+06	0.849291	-0.23567	0.437274	0.611111	0.303468
Com_2122_neg	2-(3-((Tributylstannyl)methoxy)propyl)isoindoline-1,3-dione	C24 H39 N O3 Sn	509.196	9.641	Full match	No results	No results	1.47715e+06	2.51239e+06	1.5624e+06	2.39991e+06	991680	2.61386e+06	3.24623e+06	1.35446e+06	3.21294e+06	2.37714e+06	1.9912e+06	1.58523e+06	0.839488	-0.252418	0.425044	0.611111	0.2478
Com_713_neg	N-[3,5-Bis(sulfanylmethyl)benzyl]asparagine	C13 H18 N2 O3 S2	314.077	11.75	Full match	No results	No results	6.71014e+06	435356	562183	1.26032e+06	650952	1.15948e+06	403425	441329	272656	1.09059e+07	342336	506771	0.837329	-0.256134	0.512861	0.777778	0.755436
Com_2079_neg	10-desacetyltaxuyunnanin C	C26 H38 O7	462.261	10.666	Full match	No results	No results	4.23359e+06	2.18932e+06	2.15386e+06	3.07597e+06	3.82482e+06	2.3135e+06	1.11014e+06	4.54187e+06	5.97471e+06	3.61026e+06	2.30241e+06	3.71663e+06	0.83699	-0.256718	0.750611	0.611111	0.121994
Com_768_neg	Butyl 2-{4-[4-(difluoromethyl)-2-fluorophenoxy]phenoxy}propanoate	C20 H21 F3 O4	382.138	9.067	Full match	No results	No results	3.00306e+07	14287653	2.25447e+07	3.65803e+07	1.4297e+07	2.50874e+07	34419093	1.29575e+07	2.23056e+07	3.01767e+07	3.06701e+07	4.09974e+07	0.832686	-0.264156	0.447119	0.638889	0.370042
Com_1832_neg	Di-2,5-cyclohexadien-1-yl(octyl)silane	C20 H32 Si	300.228	13.096	Full match	No results	No results	1.65495e+06	1.08606e+06	968977	1.27e+06	970653	1.46527e+06	1.07888e+06	2.46823e+06	2.38572e+06	1.63999e+06	924174	415749	0.832056	-0.265247	0.894366	0.527778	0.081665
Com_1550_neg	2,3-Dihydroxyolean-12-ene-23,28-dioic acid	C30 H46 O6	502.327	10.754	Full match	No results	No results	7.48655e+06	2.17998e+06	2.76464e+06	6.13224e+06	8.57853e+06	1.401e+06	4.56985e+06	1.74315e+06	9.0167e+06	3.48378e+06	1.39299e+07	1.71397e+06	0.828355	-0.271679	0.836822	0.444444	0.417871
Com_1494_neg	23-acetoxy-12-epi-deoxoscalarin	C29 H44 O6	488.311	10.166	Full match	No results	No results	1.98485e+06	989283	4.30769e+06	3.59434e+06	1.87009e+06	3.8385e+06	2.03618e+06	578226	342229	865320	1.50948e+07	1.16917e+06	0.825688	-0.276331	0.347723	0.722222	0.834691
Com_1506_neg	Pruvanserin	C22 H21 F N4 O	376.172	8.477	Full match	No results	No results	5.25363e+06	4.14611e+06	3.17183e+06	5.56053e+06	6.19335e+06	2.95111e+06	7.4519e+06	4.24332e+06	6.44015e+06	5.67655e+06	3.95575e+06	5.38448e+06	0.822769	-0.281441	0.221341	0.722222	0.35758
Com_818_neg	DEHYDROASCORBIC ACID	C6 H6 O6	174.016	1.124	Full match	No results	No results	5.88345e+06	3.29915e+06	5.74515e+06	8.35933e+06	9.12079e+06	8.34159e+06	9.12332e+06	7.35478e+06	6.57457e+06	9.47559e+06	9.62241e+06	7.59511e+06	0.819154	-0.287793	0.193288	0.75	0.513147
Com_1171_neg	(+)-cucurbic acid	C12 H20 O3	212.14	13.127	Full match	No results	No results	6.38654e+06	8.76406e+06	5.64584e+06	3.02756e+06	4.0525e+06	4.67744e+06	1.3565e+07	1.01739e+07	5.60251e+06	2.99859e+06	4.23802e+06	3.18537e+06	0.818692	-0.288608	0.765594	0.5	0.183912
Com_2967_neg	Baliospermin	C32 H50 O8	562.349	12.92	Full match	No results	No results	690045	316046	441142	611049	978891	456680	574361	163542	422272	404018	2.50208e+06	270833	0.805573	-0.311913	0.731118	0.694444	0.392477
Com_2103_neg	cryptophycin 1	C35 H43 Cl N2 O8	654.273	11.228	Full match	No results	No results	3.01389e+06	2.35946e+06	2.78965e+06	3.70824e+06	7.57071e+06	2.44275e+06	4.7409e+06	2.68251e+06	4.79333e+06	5.01943e+06	4.78801e+06	5.22108e+06	0.803248	-0.316082	0.196857	0.75	0.494798
Com_55_neg	Caffeic acid	C9 H8 O4	180.042	2.477	Not the top hit	Full match	Full match	2.30031e+08	1.65169e+08	1.12631e+08	2.24542e+08	5.62185e+08	2.16119e+08	2.61318e+08	5.08311e+08	2.11201e+08	6.08158e+08	1.22819e+08	1.78328e+08	0.799243	-0.323294	0.573553	0.583333	0.439201
Com_339_neg	Benfotiamine	C19 H23 N4 O6 P S	466.11	7.57	Full match	No results	No results	8.75783e+06	4.81824e+06	1.31472e+07	1.62239e+07	7.09022e+06	2.87029e+07	1.93882e+07	1.57127e+07	1.38433e+07	2.15993e+07	1.12558e+07	1.67576e+07	0.798931	-0.323856	0.22433	0.722222	0.654104
Com_400_neg	Bruceine A 綺?綾羹A	C26 H34 O11	522.208	9.882	Not the top hit	No results	Full match	1.46269e+07	1.02821e+07	1.42108e+07	1.36333e+07	1.29558e+07	1.37414e+07	2.32315e+07	1.21102e+07	1.633e+07	1.76213e+07	1.54006e+07	1.49474e+07	0.797363	-0.326691	0.0694173	0.861111	0.351029
Com_3226_neg	4-(4-{[3-(1-Piperidinyl)propyl]amino}-2-quinolinyl)benzoic acid	C24 H27 N3 O2	389.211	9.746	Full match	No results	No results	453988	295775	337468	368903	737866	592844	763790	336317	299742	728315	499407	903329	0.789273	-0.341404	0.402226	0.638889	0.456662
Com_3509_neg	N-{[1-Cyclohexyl-2-(3-furyl)-1H-benzimidazol-5-yl]carbonyl}tryptophan	C29 H28 N4 O4	496.21	11.879	Full match	No results	No results	637895	432972	836550	698855	511262	807018	1.18004e+06	508940	502190	936639	628256	1.23389e+06	0.786491	-0.346499	0.343958	0.611111	0.344108
Com_1172_neg	Paliperidone	C23 H27 F N4 O3	426.208	9.801	Full match	No results	No results	4.74759e+06	6.081e+06	4.11207e+06	6.94104e+06	4.91742e+06	4.27214e+06	1.47068e+07	5.04244e+06	7.40094e+06	6.33208e+06	2.63205e+06	3.53713e+06	0.78361	-0.351793	0.701986	0.583333	0.23627
Com_2046_neg	(+)-catechin 7-O-beta-D-xyloside	C20 H22 O10	422.119	9.337	Full match	No results	No results	929089	671904	881883	1.04228e+06	916649	1.01329e+06	962630	2.12027e+06	822924	1.23529e+06	1.07459e+06	799914	0.777564	-0.362967	0.250443	0.666667	0.300576
Com_722_neg	Patrinoside	C21 H34 O11	462.208	8.299	Full match	No results	No results	5.29062e+07	3.57582e+07	4.43977e+07	4.49992e+07	35341698	4.37082e+07	7.89038e+07	3.41611e+07	5.9543e+07	6.22929e+07	4.119e+07	5.85883e+07	0.768232	-0.380386	0.130839	0.722222	0.370057
Com_966_neg	2-(4-Hydroxyphenyl)-5,6,7,8-tetramethoxy-2,3-dihydro-4H-chromen-4-one	C19 H20 O7	360.119	9.868	Full match	No results	No results	3.38386e+06	2.86903e+06	3.3708e+06	4.4614e+06	2.63711e+06	3.63224e+06	6.21094e+06	3.71912e+06	2.71258e+06	4.98946e+06	3.80461e+06	5.14191e+06	0.76582	-0.384923	0.120508	0.805556	0.381553
Com_2198_neg	Ro15-4513	C15 H14 N6 O3	326.114	10.138	Full match	No results	No results	1.99331e+06	1.22002e+06	1.62707e+06	1.46549e+06	1.57374e+06	1.42218e+06	2.59465e+06	1.83069e+06	2.18492e+06	2.58763e+06	1.40089e+06	1.61625e+06	0.761507	-0.393071	0.0677203	0.777778	0.394487
Com_2969_neg	ambruticin	C28 H42 O6	474.296	11.328	Full match	No results	No results	631198	403844	555795	644557	901691	619609	626945	323841	601238	545216	2.49308e+06	381316	0.755625	-0.404258	0.912451	0.666667	0.245365
Com_3593_neg	Azelnidipine	C33 H34 N4 O6	582.245	11.603	Full match	No results	No results	642777	444196	805354	747136	868008	514418	1.02301e+06	727961	1.37938e+06	763021	652482	829167	0.748255	-0.418397	0.0959932	0.75	0.434922
Com_580_neg	Dodecanedioic acid	C12 H22 O4	230.151	9.485	No results	Invalid mass	No results	1.55846e+07	5.91863e+06	4.74999e+07	2.8986e+07	6.35129e+06	2.52577e+07	6.68987e+07	2.95909e+06	1.34122e+07	1.03588e+07	3.85818e+07	41167780	0.747487	-0.419879	0.832282	0.555556	0.459551
Com_533_neg	Sinapinic acid	C11 H12 O5	224.068	3.29	Full match	Full match	Full match	9.71896e+06	2.75632e+07	3.5416e+07	1.93392e+07	3.28645e+07	2.38445e+07	4.21778e+07	2.29357e+07	3.04382e+07	4.28976e+07	3.05013e+07	3.01867e+07	0.746954	-0.420909	0.14874	0.722222	0.473193
Com_2077_neg	Dibenzothiophene sulfone	C12 H8 O2 S	216.024	1.102	Full match	No results	No results	2.88768e+06	909653	1.48093e+06	1.76757e+06	1.83846e+06	1.92907e+06	3.36201e+06	1.99273e+06	1.7698e+06	2.26602e+06	2.18256e+06	2.92263e+06	0.745968	-0.422815	0.111488	0.833333	0.592802
Com_1475_neg	Plantamajoside	C29 H36 O16	640.2	8.789	Full match	No results	No results	1.31625e+06	606628	583052	666148	1.38091e+06	1.23607e+06	552350	2.46514e+06	1.75959e+06	1.32774e+06	643674	1.0331e+06	0.743943	-0.426736	0.446919	0.611111	0.346388
Com_1010_neg	guajavarin	C20 H18 O11	434.084	7.945	Partial match	No results	Full match	3.30841e+06	2.24557e+06	2.80633e+06	3.14093e+06	3.47458e+06	5.0733e+06	4.98852e+06	3.41995e+06	3.65624e+06	5.29994e+06	5.16133e+06	4.61815e+06	0.738617	-0.437102	0.0406653	0.861111	0.521037
Com_1081_neg	Salicin 6-phosphate	C13 H19 O10 P	366.07	7.025	Full match	No results	No results	8.03009e+06	4.78101e+06	1.32316e+07	8.75546e+06	9.24093e+06	6.55676e+06	9.00696e+06	1.09319e+07	1.07784e+07	1.70342e+07	1.01076e+07	1.11438e+07	0.733243	-0.447637	0.0742496	0.833333	0.479024
Com_3463_neg	3-(Trifluoromethyl)phenylalanine	C10 H10 F3 N O2	233.065	14.567	Full match	No results	No results	78993.7	51712.1	114261	92042.1	75073.8	93427.3	193532	80234.9	92485.2	80652.4	137601	108686	0.72925	-0.455514	0.135607	0.75	0.474641
Com_2927_neg	Artemether	C16 H26 O5	298.177	10.369	Full match	No results	No results	634155	364798	306470	640848	517198	442233	1.10702e+06	430144	515891	723181	515437	735804	0.721469	-0.470991	0.124391	0.722222	0.567745
Com_4010_neg	4-[2-(4,4,5,5-Tetramethyl-1,3,2-dioxaborolan-2-yl)ethyl]phenyl acetate	C16 H23 B O4	290.169	7.678	Full match	No results	No results	101413	68045.1	84191.1	107684	104514	97209.4	161939	60172.6	80439.2	161546	256655	64835.4	0.716733	-0.480493	0.458671	0.527778	0.413355
Com_2091_neg	Marinobufagenin	C24 H32 O5	400.224	13.239	Full match	No results	No results	509729	1.07462e+06	1.00689e+06	543402	496355	524447	1.07964e+06	507419	230801	2.62954e+06	627017	727433	0.716227	-0.481511	0.768594	0.583333	0.202069
Com_651_neg	Indican	C14 H17 N O6	295.104	8.07	Full match	No results	No results	2.04764e+07	1.75646e+07	2.56339e+07	2.41849e+07	6.50722e+06	2.39527e+07	2.40387e+07	1.65086e+07	2.25869e+07	3.96474e+07	3.28292e+07	3.03275e+07	0.713035	-0.487956	0.155279	0.722222	0.525234
Com_5447_neg	UNII:2P8NSB75RS	C42 H64 N12 O12 S2	992.421	11.707	Full match	No results	No results	169235	115006	386677	264881	165972	171555	390581	432304	201561	95038.9	136443	534794	0.711068	-0.49194	0.495478	0.638889	0.335966
Com_1568_neg	Kynurenine	C10 H12 N2 O3	208.084	7.266	Full match	No results	No results	4.48775e+06	3.39641e+06	3.75528e+06	3.37082e+06	5.91782e+06	3.56274e+06	3.63467e+06	1.25357e+07	3.43172e+06	3.80365e+06	3.50589e+06	7.68938e+06	0.707806	-0.498574	0.372709	0.638889	0.310681
Com_66_neg	afzelin	C21 H20 O10	432.104	10.084	Partial match	No results	Full match	8.60866e+07	1.27857e+08	8.81701e+07	175824785	168856680	1.24929e+08	2.1455e+08	1.6207e+08	1.84249e+08	1.95896e+08	8.35446e+07	2.51441e+08	0.706869	-0.500485	0.130619	0.777778	0.494886
Com_1346_neg	Cicutoxin	C17 H22 O2	258.162	10.888	Full match	No results	No results	4.63724e+06	1.32484e+06	9.02491e+06	1.1018e+07	655124	3.33277e+06	1.74954e+07	662580	3.1272e+06	2.81756e+06	5.5683e+06	1.32263e+07	0.699179	-0.516267	0.671951	0.583333	0.58166
Com_3173_neg	TMPTMA	C18 H26 O6	338.174	9.281	Full match	No results	No results	480147	329137	242613	439894	567693	422240	520487	760004	606368	803736	441577	419339	0.69878	-0.51709	0.0540364	0.805556	0.561561
Com_2396_neg	1-Fluoro-4-{2-[4-(methylsulfonyl)phenyl]-1-cyclopenten-1-yl}benzene	C18 H17 F O2 S	316.093	8.176	Full match	No results	No results	1.39042e+06	621236	797238	1.35152e+06	2.00963e+06	864999	1.94259e+06	3.10287e+06	955822	1.87405e+06	811756	1.39885e+06	0.69751	-0.519714	0.239045	0.722222	0.605667
Com_1022_neg	Pinocembrin 漑橄羹	C15 H12 O4	256.072	11.91	No results	No results	Invalid mass	2.40916e+06	1.15677e+06	920500	1.17692e+06	3.64732e+06	843192	1.45436e+06	1.11714e+06	486447	9.61514e+06	885220	1.07937e+06	0.693681	-0.527657	0.933831	0.583333	0.307272
Com_1951_neg	callystatin A	C29 H44 O4	456.322	12.453	Full match	No results	No results	848983	583869	756376	3.28787e+06	1.30409e+06	858142	474683	295631	417659	1.36294e+06	8.14251e+06	479815	0.683716	-0.54853	0.672443	0.694444	0.449463
Com_591_neg	Jasmonic acid	C12 H18 O3	210.125	9.417	Full match	No results	No results	1.99287e+07	3.60892e+06	2.85671e+07	3.0005e+07	3.38211e+06	1.37382e+07	3.91161e+07	4.24679e+06	1.71043e+07	2.11386e+07	2.37862e+07	4.04014e+07	0.680621	-0.555076	0.364901	0.694444	0.848494
Com_2579_neg	Rhodojaponin IV	C24 H38 O8	454.256	10.987	Full match	No results	No results	1.3761e+06	1.0907e+06	900569	1.3911e+06	1.59536e+06	1.1756e+06	1.2309e+06	3.33916e+06	1.02922e+06	1.37277e+06	562252	3.66028e+06	0.672594	-0.572192	0.530821	0.527778	0.287171
Com_2912_neg	phomopsin A	C36 H45 Cl N6 O12	788.282	10.512	Full match	No results	No results	253710	314193	218801	405667	254739	505810	275764	612743	565600	804264	232611	425771	0.669553	-0.57873	0.1697	0.75	0.48939
Com_41_neg	Diosmetin-7-O-┑-D-glucopyranoside 窮秊?羹-7-O-┑-D-?境鎌宓	C22 H22 O11	462.115	7.832	Partial match	No results	Full match	1.09217e+07	8.00791e+06	1.81563e+07	1.46467e+07	1.54247e+07	2.13003e+07	2.8014e+07	2.16292e+07	2.41849e+07	3.23769e+07	1.56783e+07	1.26966e+07	0.657286	-0.605407	0.067827	0.833333	0.658736
Com_1766_neg	4-Hydroxy-5-methyl-3-tetradecyldihydro-2(3H)-furanone	C19 H36 O3	312.265	13.857	Full match	No results	No results	1.2897e+06	957313	492876	1.03498e+06	818789	943357	1.03645e+06	2.14479e+06	2.46141e+06	1.36907e+06	751680	703968	0.653924	-0.612805	0.201566	0.694444	0.49153
Com_233_neg	Gentiopicrin	C16 H20 O9	356.11	7.684	Full match	No results	No results	3.91964e+07	1.57281e+07	1.85615e+07	3.08607e+07	1.63169e+07	1.13354e+07	3.2165e+07	4.3262e+07	2.52339e+07	4.6573e+07	2.64732e+07	2.90461e+07	0.651034	-0.619196	0.0524881	0.805556	0.69861
Com_2262_neg	1-deoxy-D-altro-heptulose 7-phosphate	C7 H15 O9 P	274.046	7.113	Full match	No results	No results	1.26903e+06	886610	1.1759e+06	1.31801e+06	1.30776e+06	1.25599e+06	1.1622e+06	2.81287e+06	1.12515e+06	3.40915e+06	1.17736e+06	1.42442e+06	0.649194	-0.623278	0.166123	0.611111	0.473214
Com_1975_neg	butanilicaine	C13 H19 Cl N2 O	254.117	10.156	Full match	No results	No results	2.40558e+06	1.33665e+06	918092	1.59982e+06	1.92153e+06	1.40621e+06	3.46962e+06	1.68843e+06	2.33422e+06	1.90758e+06	1.79845e+06	3.634e+06	0.646419	-0.629459	0.0486067	0.805556	0.668854
Com_1333_neg	PD123319	C31 H32 N4 O3	508.25	9.89	Full match	No results	No results	1.07426e+07	4.59733e+06	5.22627e+06	9.52577e+06	8.66564e+06	4.06506e+06	1.55347e+07	8.40243e+06	9.72348e+06	9.99008e+06	1.30623e+07	9.81419e+06	0.643686	-0.63557	0.0364638	0.833333	0.763039
Com_631_neg	e-Tokoferol	C28 H42 O2	410.317	14.349	Full match	No results	No results	1.01522e+07	3.53905e+06	7.54107e+06	2.51675e+07	4.02837e+07	4.44884e+06	6.69911e+06	9.85447e+06	1.47165e+07	1.64964e+07	9.09904e+07	3.09731e+06	0.642437	-0.638372	0.727066	0.527778	0.622315
Com_120_neg	zinniol	C15 H22 O4	266.154	13.424	No match	No results	Invalid mass	9.28088e+07	6.06948e+07	1.5052e+08	191082964	1.07946e+08	1.05854e+08	1.1213e+08	8.28568e+07	1.71803e+08	6.28563e+07	7.61446e+07	6.00601e+08	0.640737	-0.642196	0.699324	0.5	0.250299
Com_2537_neg	Ethanal tetramer	C8 H16 O4	176.104	8.269	Full match	No results	No results	1.1311e+06	287314	733932	1.09685e+06	762247	1.34173e+06	1.20666e+06	3.23968e+06	768015	910628	573315	1.6855e+06	0.638513	-0.647211	0.288008	0.666667	0.678517
Com_115_neg	D-(+)-Glucose	C6 H12 O6	90.031	1.743	No results	Invalid mass	No results	2.69984e+07	2.25953e+07	2.09455e+07	3.35064e+07	3.17599e+07	2.40726e+07	7.40321e+07	3.38791e+07	3.39948e+07	3.53469e+07	3.48516e+07	3.98908e+07	0.634449	-0.656424	0.0191337	1	0.659635
Com_2530_neg	Agnuside	C22 H26 O11	466.146	8.432	Full match	No results	No results	600703	358589	335815	568427	1.14497e+06	364921	696259	929001	909446	1.60278e+06	384657	835623	0.629632	-0.667418	0.106281	0.805556	0.737352
Com_251_neg	Quizalofop-P-tefuryl	C22 H21 Cl N2 O5	428.112	8.512	Full match	No results	No results	1.3644e+07	1.16497e+07	2.34484e+07	1.17836e+07	8.67653e+06	1.36938e+07	2.88764e+07	1.428e+07	2.26822e+07	2.58982e+07	1.84e+07	2.30511e+07	0.6224	-0.684085	0.0158278	0.888889	0.67834
Com_663_neg	Falcarindiol	C17 H24 O2	260.178	11.206	Full match	No results	No results	1.8361e+07	7.21294e+06	5.25128e+07	3.18171e+07	4.3228e+06	23345441	1.01733e+08	2.00126e+06	1.41594e+07	1.04789e+07	4.21379e+07	5.10617e+07	0.620892	-0.687587	0.80245	0.555556	0.472166
Com_1730_neg	2,2'-Bis(benzyloxy)-1,1'-binaphthalene	C34 H26 O2	466.195	10.746	Full match	No results	No results	3.33583e+06	3.1727e+06	1.43174e+06	2.94234e+06	1.6381e+06	731080	921805	1.84026e+06	4.23316e+06	5.06283e+06	3.31516e+06	6.29493e+06	0.611579	-0.709389	0.27405	0.75	0.637126
Com_1137_neg	6-Nitro-N-phenyl-4-quinazolinamine	C14 H10 N4 O2	266.081	6.331	Full match	No results	No results	2.37921e+06	1.76917e+06	3.22855e+06	2.90354e+06	2.99717e+06	1.62367e+06	5.80352e+06	4.66803e+06	3.85033e+06	4.27689e+06	3.11283e+06	2.79877e+06	0.607959	-0.717953	0.0110726	0.888889	0.718794
Com_5866_neg	3,4-dihydroxyphenylpyruvic acid	C9 H8 O5	196.038	2.755	Full match	No results	No results	176166	121891	143900	162481	157607	149057	354877	125493	199969	395984	149385	299654	0.597302	-0.743467	0.0767186	0.777778	0.660056
Com_1529_neg	[(2-Nitrophenyl)sulfanyl]acetic acid	C8 H7 N O4 S	213.009	8.001	Full match	No results	No results	1.00498e+06	859975	1.59761e+06	1.47002e+06	782965	1.79084e+06	3.57782e+06	1.13346e+06	1.83626e+06	2.05462e+06	1.7038e+06	2.26154e+06	0.597285	-0.743509	0.0367154	0.888889	0.74422
Com_3579_neg	5,6,7-Trifluorotryptophan	C11 H9 F3 N2 O2	258.062	9.42	Full match	No results	No results	651061	307656	462731	505702	608747	489522	1.20231e+06	722915	929001	785190	646815	779444	0.597239	-0.74362	0.00415305	0.972222	0.799957
Com_3010_neg	Motesanib	C22 H23 N5 O	373.192	11.217	Full match	No results	No results	554919	237857	1.12126e+06	1.02162e+06	426021	385007	3.71623e+06	168054	282928	283589	744765	1.21523e+06	0.584434	-0.774887	0.85425	0.5	0.515963
Com_4264_neg	2-(1-Cyclohexen-1-yl)ethyl 4-methylbenzenesulfonate	C15 H20 O3 S	280.112	8.658	Full match	No results	No results	213046	130065	177988	210146	226582	200159	296903	315415	145159	392268	249224	587259	0.583008	-0.778412	0.059551	0.861111	0.687905
Com_1480_neg	2-Phenylethyl 6-O-beta-D-xylopyranosyl-beta-D-glucopyranoside	C19 H28 O10	416.167	9.718	Full match	No results	No results	4.05422e+06	1.96465e+06	1.83857e+06	1.04174e+07	4.44209e+06	2.95767e+06	1.35019e+07	2.22372e+06	1.40655e+07	1.15539e+07	1.32138e+06	1.71257e+06	0.57853	-0.789536	0.604783	0.555556	0.83372
Com_881_neg	Methyl cinnamate	C10 H10 O2	162.067	9.44	Full match	No results	No results	5.1895e+06	3.57143e+06	5.33543e+06	5.74443e+06	5.23396e+06	5.45469e+06	1.46677e+07	8.84326e+06	8.35568e+06	5.77137e+06	3.99443e+06	1.12254e+07	0.577577	-0.791914	0.055108	0.861111	0.709952
Com_2406_neg	2-Butyryl-3,5-dihydroxy-4,6-dimethylphenyl alpha-D-glucopyranoside	C18 H26 O9	386.156	10.951	Full match	No results	No results	1.91071e+06	2.04904e+06	2.58259e+06	883080	2.12087e+06	2.03808e+06	5.93179e+06	4.4203e+06	2.21576e+06	2.45686e+06	2.18393e+06	3.0173e+06	0.572748	-0.804028	0.0405913	0.916667	0.725007
Com_2385_neg	Dihydropteroic acid	C14 H14 N6 O3	314.114	10.096	Full match	No results	No results	866393	753887	956191	1.44612e+06	1.96439e+06	897002	1.04102e+06	1.66712e+06	1.44077e+06	2.34544e+06	4.88183e+06	739792	0.568174	-0.815596	0.199623	0.694444	0.636761
Com_899_neg	guaiapate	C18 H29 N O4	323.208	11.393	Full match	No results	No results	1.53864e+06	1.1351e+06	3.12421e+06	3.91053e+06	622928	5.86712e+06	3.9039e+06	366464	3.27731e+06	5.94712e+06	5.62623e+06	9.69886e+06	0.562061	-0.831202	0.417386	0.694444	0.765816
Com_703_neg	bruceine D	C20 H26 O9	410.156	8.437	Full match	No results	No results	2.67952e+07	1.22781e+07	1.5001e+07	2.73125e+07	8.62443e+06	1.28586e+07	3.29505e+07	2.78734e+07	1.96751e+07	6.96271e+07	1.99863e+07	1.44443e+07	0.557389	-0.843244	0.100454	0.805556	0.776147
Com_1502_neg	Streptamine 4-phosphate	C6 H15 N2 O7 P	258.062	8.52	Full match	No results	No results	1.58705e+06	902230	828362	873268	1.56663e+06	1.04685e+06	1.94103e+06	1.96954e+06	1.62784e+06	2.34858e+06	1.98654e+06	2.52525e+06	0.548795	-0.865661	0.00199053	1	0.891639
Com_1156_neg	Vanillic acid	C8 H8 O4	168.041	1.899	Not the top hit	Full match	Full match	1.20451e+07	6.86765e+06	9.73022e+06	1.12717e+07	8.76377e+06	1.11087e+07	2.57552e+07	6.00787e+06	1.59112e+07	1.77155e+07	2.37723e+07	2.06976e+07	0.544214	-0.877754	0.059134	0.833333	0.810205
Com_1478_neg	C1'-C9-Glycosylated UWM6	C25 H28 O9	472.172	11.519	Full match	No results	No results	1.28897e+06	809474	1.23312e+06	1.12036e+06	613091	1.07975e+06	3.12621e+06	1.52841e+06	1.2589e+06	2.04105e+06	1.94118e+06	1.40571e+06	0.543714	-0.879081	0.00783984	0.972222	0.842428
Com_2053_neg	2,6-Dimethyl-1-hepten-4-yl 4-methylbenzenesulfonate	C16 H24 O3 S	296.146	6.77	Full match	No results	No results	854731	751634	1.33498e+06	648550	8.10069e+06	946271	7.38189e+06	1.61076e+06	6.6482e+06	2.04121e+06	5.23879e+06	984891	0.528612	-0.91972	0.118541	0.805556	1.34178
Com_1812_neg	Hydrocortisone Valerate	C26 H38 O6	446.265	13.246	Full match	No results	No results	584423	1.3121e+06	3.08003e+06	620098	569088	601298	2.895e+06	1.1753e+06	762764	6.06784e+06	1.49062e+06	562073	0.522406	-0.936757	0.260278	0.666667	0.753343
Com_1561_neg	Ethinylestradiol sulfonate	C23 H30 O4 S	402.188	10.849	Full match	No results	No results	3.85574e+06	3.13578e+06	6.5296e+06	3.34016e+06	1.07792e+07	2.22952e+06	1.58502e+07	9.37656e+06	7.37057e+06	5.22436e+06	6.18511e+06	1.34011e+07	0.520311	-0.942554	0.0356348	0.833333	1.01131
Com_679_neg	hesperetin 7-O-beta-D-glucoside	C22 H24 O11	464.13	8.071	Full match	No results	No results	2.44132e+07	2.42387e+07	4.81018e+07	2.59478e+07	3.85523e+07	3.61984e+07	6.61854e+07	6.72915e+07	5.85463e+07	6.61296e+07	4.57878e+07	7.71406e+07	0.518137	-0.948595	0.000998587	0.972222	0.937621
Com_5373_neg	Cinnamtannin B2	C60 H48 O24	1152.25	11.656	Full match	No results	No results	136386	131986	127178	138266	139435	134575	85985.5	320841	444786	341289	257313	115563	0.515926	-0.954764	0.116824	0.666667	0.688985
Com_468_neg	Methylophiopogonone A	C19 H16 O6	340.096	1.911	Full match	No results	No results	1.66699e+07	8.05869e+06	6.156e+06	1.60939e+07	1.46756e+07	1.63733e+07	1.17027e+07	1.60937e+07	2.03001e+07	2.39674e+07	7.17947e+07	1.19102e+07	0.500918	-0.997352	0.138763	0.694444	0.816122
Com_2116_neg	11-Deoxocucurbitacin I	C30 H44 O6	500.311	13.234	Full match	No results	No results	587184	389401	756295	843875	1.18578e+06	591593	376101	343026	921944	567974	6.15665e+06	350235	0.49956	-1.00127	0.906559	0.666667	0.18623
Com_1542_neg	LAPPAOL C	C30 H34 O10	554.213	10.101	Full match	No results	No results	3.38437e+06	3.61356e+06	3.52712e+06	4.90633e+06	5.83287e+06	3.65088e+06	1.47926e+07	4.3373e+06	6.51012e+06	7.69539e+06	7.78492e+06	8.76948e+06	0.499403	-1.00172	0.00879748	0.944444	0.955115
Com_396_neg	Coumarone	C8 H6 O	118.041	7.364	Full match	No results	No results	5.40573e+06	3.19084e+06	4.23595e+06	7.22559e+06	4.62922e+06	4.60594e+06	9.90916e+06	1.13887e+07	6.59828e+06	1.59503e+07	6.51723e+06	8.31401e+06	0.499223	-1.00224	0.00401729	0.944444	0.982691
Com_2332_neg	Omadacycline	C29 H40 N4 O7	556.287	9.968	Full match	No results	No results	1.29659e+06	702684	365720	974475	1.70532e+06	671637	2.11134e+06	1.44632e+06	822397	1.0543e+06	5.25449e+06	1.64688e+06	0.463404	-1.10966	0.0759519	0.805556	1.04147
Com_1280_neg	Flufenamic Acid	C14 H10 F3 N O2	281.067	12.25	Full match	No results	No results	1.57922e+06	1.93303e+06	2.65184e+06	565848	920032	629923	2.66304e+06	3.32258e+06	1.4693e+06	8.39076e+06	1.40344e+06	821233	0.458203	-1.12594	0.159506	0.722222	0.895984
Com_2119_neg	soyasapogenol A	C30 H50 O4	474.369	14.953	Full match	No results	No results	373969	304667	315540	365607	1.63588e+06	364535	1.40551e+06	1.19991e+06	2.32217e+06	959479	870828	636729	0.454411	-1.13793	0.0173864	0.861111	1.35942
Com_757_neg	S-benzyl phenylmethanethiosulfinate	C14 H14 O S2	262.05	7.451	Full match	No results	No results	1.7996e+06	1.2238e+06	2.19346e+06	1.64012e+06	1.01906e+06	1.48271e+06	5.32295e+06	2.30222e+06	3.46971e+06	3.11104e+06	3.37613e+06	3.54434e+06	0.442989	-1.17466	0.000409543	1	1.13103
Com_1416_neg	Salidroside	C14 H20 O7	300.12	6.944	Full match	No results	No results	3.36374e+06	3.75337e+06	3.52677e+06	5.532e+06	1.35991e+06	4.01823e+06	7.88484e+06	2.99981e+06	7.85531e+06	7.94731e+06	7.94972e+06	1.4962e+07	0.434566	-1.20235	0.0174836	0.861111	1.11104
Com_1503_neg	4-amino-2-hydroxyamino-6-nitrotoluene	C7 H9 N3 O3	183.065	10.895	Full match	No results	No results	1.18855e+06	894836	770809	2.28111e+06	845962	1.25529e+06	1.77728e+06	2.5426e+06	3.03901e+06	6.14848e+06	1.48e+06	1.88522e+06	0.428894	-1.22131	0.0142109	0.916667	1.13288
Com_2533_neg	Makisterone A	C28 H46 O7	494.322	15.073	Full match	No results	No results	383221	253714	352697	469045	345312	420253	276888	247471	184079	240022	4.08212e+06	237487	0.422212	-1.24396	0.940318	0.805556	0.139183
Com_5609_neg	Toonacilin	C31 H38 O9	554.251	11.661	Full match	No results	No results	58225.9	40255.9	52064.3	56874.9	59255.3	54707.3	33846.5	35030.8	438087	48022	77380.5	130879	0.421075	-1.24785	0.363516	0.527778	0.54999
Com_1258_neg	1-Naphthol	C10 H8 O	144.057	11.227	Full match	No results	No results	697040	437799	841771	768562	784133	708643	1.37972e+06	3.53113e+06	453562	3.55481e+06	786029	493579	0.415533	-1.26697	0.207863	0.694444	0.80866
Com_2779_neg	Metildigoxin	C42 H66 O14	794.445	14.027	Full match	No results	No results	758848	925022	1.31179e+06	687526	1.03765e+06	394039	2.18483e+06	1.36858e+06	1.72459e+06	3.11289e+06	1.86579e+06	2.25196e+06	0.408907	-1.29015	0.00150188	1	1.26112
Com_1013_neg	MUCIC ACID	C6 H10 O8	210.036	1.387	No results	No results	Invalid mass	8.14279e+06	7.97928e+06	1.17152e+07	1.27696e+07	7.2561e+06	1.2911e+07	2.33541e+07	1.72506e+07	2.42758e+07	2.7293e+07	3.29021e+07	2.49254e+07	0.405157	-1.30345	7.16e-05	1	1.26625
Com_5524_neg	Rosabulin	C22 H16 N4 O2 S	400.099	3.817	Full match	No results	No results	163509	84774.2	112985	112967	115635	111104	190196	449727	438784	432025	151066	183655	0.379838	-1.39654	0.00668978	0.972222	1.21928
Com_1924_neg	8-Bromo-2,6-dimethyl-2-octene	C10 H19 Br	218.068	6.721	Full match	No results	No results	1.40202e+06	841614	1.9241e+06	1.3537e+06	1.71835e+06	1.21335e+06	1.29036e+07	1.79736e+06	1.50905e+06	3.23146e+06	1.71006e+06	1.58234e+06	0.37183	-1.42728	0.122122	0.805556	1.03663
Com_555_neg	4-(Hydroxymethyl)benzenesulfonic acid	C7 H8 O4 S	188.014	7.089	Full match	No results	No results	1.90427e+06	559572	1.73828e+06	866137	999152	3.16266e+06	2.26323e+06	9.4626e+06	7.64719e+06	1.94012e+06	2.14505e+06	1.47812e+06	0.370146	-1.43383	0.0578605	0.833333	1.23566
Com_245_neg	dihydroconiferyl alcohol glucoside	C16 H24 O8	344.146	10.379	Full match	No results	No results	5.62655e+07	3.32832e+07	2.56132e+07	1.01585e+08	6.00381e+07	7.42614e+07	8.89151e+07	1.68881e+08	2.12641e+08	291403813	8.56515e+07	1.02677e+08	0.369456	-1.43652	0.00719709	0.944444	1.44325
Com_795_neg	17beta-(Acetylthio)estra-1,3,5(10)-trien-3-ol acetate	C22 H28 O3 S	372.177	8.483	Full match	No results	No results	1.56406e+07	3.49289e+06	3.23748e+06	1.82209e+07	6.12569e+06	3.35915e+06	3.21872e+07	2.48128e+07	2.47019e+07	3.24162e+07	4.60553e+06	2.37248e+07	0.351542	-1.50823	0.0256488	0.916667	1.72947
Com_10_neg	Caffeic acid 3-glucoside	C15 H18 O9	342.094	2.471	Full match	No results	No results	4.59946e+08	2.17302e+08	2.54346e+08	7.9962e+08	1.82892e+08	6.95088e+08	6.61874e+08	622890493	1471757593	3138937077	810347336	7.96986e+08	0.347763	-1.52382	0.0172489	0.861111	1.48526
Com_24_neg	Catechin	C15 H14 O6	290.078	7.747	Full match	Full match	Not the top hit	9.28266e+08	674499299	8.49427e+08	1996800502	2926097329	1336461237	2869218191	5519193905	3724762914	8669161060	2072803918	2423637283	0.344619	-1.53693	0.00711541	0.916667	1.57294
Com_880_neg	(+)-lyoniresinol	C22 H28 O8	420.177	8.656	Full match	No results	No results	3.64992e+06	2.85608e+06	3.8273e+06	5.08049e+06	3.0789e+06	6.76008e+06	1.21884e+07	1.47833e+07	1.14187e+07	1.71744e+07	1.11949e+07	9.01081e+06	0.333279	-1.5852	6.81e-05	1	1.57606
Com_2010_neg	Cucurbitacin S	C30 H42 O6	498.296	12.951	Full match	No results	No results	538368	363735	482472	531507	518628	544108	339021	198651	221158	297926	7.61332e+06	318495	0.331401	-1.59335	0.938576	0.833333	0.118165
Com_1283_neg	Paeonolide	C20 H28 O12	460.156	9.084	Full match	No results	No results	832084	704428	782135	987876	854336	809988	2.28104e+06	3.54258e+06	2.66204e+06	3.24154e+06	1.70012e+06	3.18935e+06	0.299148	-1.74107	3.65e-05	1	1.63237
Com_308_neg	18-┑-Glycyrrhetinic acid	C30 H46 O4	470.338	13.646	Full match	Full match	No results	1.15077e+07	9.59742e+06	6.81874e+06	4.94825e+07	3.61314e+07	7.14789e+06	1.12542e+07	1.2426e+07	1.37661e+07	2.24247e+07	3.40179e+08	7.06564e+06	0.296441	-1.75418	0.569304	0.611111	0.697568
Com_15_neg	(+)-Catechin hydrate (+)-??羹	C15 H14 O6	290.078	6.993	Partial match	No results	Full match	1765965020	7.6538e+08	1850864462	2221060296	3346253200	1432752091	5017216887	7550946508	6362951108	12559822606	3139940479	3824451232	0.295987	-1.75639	0.00179858	0.972222	1.73517
Com_545_neg	Asperuloside	C18 H22 O11	414.114	7.209	Full match	No results	No results	1.86429e+07	6.02711e+06	2.76477e+07	1.87567e+07	4.13282e+06	2.65329e+07	5.43753e+07	2.742e+07	4.52443e+07	3.42714e+07	1.17929e+08	7.273e+07	0.289059	-1.79056	0.00819745	0.972222	1.86601
Com_2106_neg	tubiferal A	C30 H42 O5	482.301	13.17	Full match	No results	No results	327199	218813	285866	365150	505629	338304	208930	120436	140881	349241	6.76097e+06	189307	0.26268	-1.92862	0.956493	0.722222	0.216137
Com_2012_neg	4-(3,5-Difluorophenyl)-1H-1,2,3-triazole	C8 H5 F2 N3	181.045	3.546	Full match	No results	No results	1.22286e+06	928297	833860	1.27681e+06	1.51085e+06	987691	4.54185e+06	4.71668e+06	2.73103e+06	4.8467e+06	4.0329e+06	5.42671e+06	0.257088	-1.95966	1.51e-06	1	1.89494
Com_292_neg	Acetophenone	C8 H8 O	120.057	2.077	Full match	No results	No results	4.19378e+07	2.47956e+07	3.47439e+07	4.37032e+07	1.77224e+07	3.71848e+07	6.52162e+07	3.04074e+07	3.29156e+08	2.74406e+08	4.37576e+07	5.32925e+07	0.251292	-1.99256	0.0586685	0.888889	1.39452
Com_1369_neg	alpkinidine	C19 H13 N3 O3	331.096	1.863	Full match	No results	No results	2.37042e+06	1.73517e+06	2.08267e+06	3.26984e+06	1.93741e+06	2.86702e+06	8.30033e+06	1.99808e+06	1.44341e+07	8.77745e+06	1.65786e+07	6.68994e+06	0.251196	-1.99311	0.00924862	0.888889	1.72364
Com_2723_neg	cinnamtannin A2	C60 H50 O24	1154.27	6.039	Full match	No results	No results	217652	150462	200429	232752	211764	211460	342728	1.19985e+06	1.15025e+06	1.27891e+06	471909	555994	0.244921	-2.02961	0.00194446	1	1.77431
Com_605_neg	7-deoxyloganin	C17 H26 O9	374.156	8.081	Full match	No results	No results	1.05684e+07	8.0129e+06	5.92164e+06	1.24945e+07	1.19126e+07	1.14671e+07	1.65285e+07	3.05788e+07	2.9101e+07	5.59718e+07	7.20344e+07	4.57139e+07	0.241577	-2.04944	0.000678066	1	1.86361
Com_3092_neg	Phenprocoumon	C18 H16 O3	280.11	8.642	Full match	No results	No results	175611	133196	148053	194489	199955	254422	3.41601e+06	243768	181182	304561	404266	317235	0.227187	-2.13805	0.104548	0.888889	1.37384
Com_1076_neg	longipedumin A	C31 H32 O8	532.209	10.237	Full match	No results	No results	1.87964e+06	2.15276e+06	2.37943e+06	5.9013e+06	3.57125e+06	4.94964e+06	1.04461e+07	1.59575e+07	2.22224e+07	2.84138e+07	1.05109e+07	1.0807e+07	0.211819	-2.2391	0.000135094	1	2.1954
Com_363_neg	altersolanol A	C16 H16 O8	336.083	7.008	Full match	No results	No results	4.00687e+07	1.52705e+07	4.10707e+07	4.00444e+07	5.45662e+07	3.38131e+07	235435497	1.64069e+08	1.20863e+08	2.34807e+08	2.40504e+08	1.52983e+08	0.195735	-2.35302	3.32e-05	1	2.37046
Com_40_neg	Epicatechin ???羹	C15 H14 O6	290.078	7.64	Full match	No results	Full match	3.24613e+08	1.10725e+08	2.37677e+08	5.65109e+08	7.61704e+08	2.78505e+08	1346274299	2512538437	1662069768	4652326071	7.49329e+08	1084041051	0.189757	-2.39777	0.00150923	0.972222	2.41078
Com_1931_neg	Velloquercetin	C20 H16 O7	368.091	6.036	Full match	No results	No results	950268	566695	919650	1.03659e+06	1.01819e+06	1.00156e+06	6.48645e+06	3.24321e+06	4.62868e+06	6.12683e+06	8.34362e+06	7.86108e+06	0.149713	-2.73973	2.7e-06	1	2.61462
Com_3812_neg	Athamantin	C24 H30 O7	430.197	10.905	Full match	No results	No results	43479.8	29325.2	41089.5	46072.6	46479.1	41994	155710	85756.6	19400.5	67655	79903.4	1.27369e+06	0.147695	-2.75931	0.140211	0.833333	1.38887
Com_1248_neg	3,5-Dihydroxy-4-[(6-O-sulfo-beta-D-glucopyranosyl)oxy]benzoic acid	C13 H16 O13 S	412.029	1.886	Full match	No results	No results	1.82363e+06	2.77845e+06	1.47436e+06	1.43489e+06	1.45903e+06	1.42563e+06	2.46779e+07	3.47896e+06	9.01928e+06	1.22789e+07	7.7181e+06	2.18377e+07	0.131577	-2.92602	0.000863412	1	2.56281
Com_365_neg	Chaksine	C22 H38 N6 O4	450.296	14.166	Full match	No results	No results	4.49254e+06	1.61646e+06	3.07147e+06	1.01638e+07	1.11517e+07	3.22741e+06	4.93651e+06	2.76671e+06	2.71785e+06	4.21924e+06	2.55308e+08	3.00698e+06	0.123549	-3.01684	0.58735	0.555556	0.873739
Com_68_neg	1-(1H-Indol-3-ylcarbonyl)-9H-beta-carboline-3-carboxylic acid	C21 H13 N3 O3	355.097	3.6	Full match	No results	No results	2.28681e+08	1.60477e+08	1.25377e+08	1.53931e+08	3.4605e+08	1.04106e+08	1669834724	2001752631	9.2192e+08	1646025421	1354574488	1632258258	0.121242	-3.04404	4.63e-06	1	2.99705
Com_7_neg	Chlorogenic acid	C16 H18 O9	354.094	3.544	Full match	Full match	Full match	1435506421	9.78541e+08	645070675	8.57028e+08	2018908246	6.53627e+08	10141910201	12928937095	6712505828	10136959420	10481060202	10014287100	0.109056	-3.19686	8.85e-06	1	3.16399
Com_1619_neg	(~232~Th)Thorium	Th	232.039	7.031	Full match	No results	No results	940384	638111	751414	1.18655e+06	669215	894018	1.26641e+07	7.87095e+06	4.58228e+06	5.41923e+06	5.56383e+06	1.22286e+07	0.105106	-3.25008	6.4e-06	1	3.05251
Com_415_neg	aldioxa	C4 H7 Al N4 O5	218.024	5.858	Full match	No results	No results	3.91133e+06	2.19669e+06	3.26335e+06	9.0326e+06	5.56465e+06	8.13626e+06	1.2689e+08	7.00119e+07	6.06978e+07	5.8985e+07	110086840	1.99639e+08	0.0512603	-4.28601	1.78e-06	1	4.20005

## Sheet: A3vsC3
ID	Name_des	Formula	Molecular Weight	RT [min]	ChemSpider_Results	mzCloud_Results	mzVault_Results	neg_A31	neg_A32	neg_A33	neg_A34	neg_A35	neg_A36	neg_C31	neg_C32	neg_C33	neg_C34	neg_C35	neg_C36	FC	log2FC	Pvalue	ROC	VIP
Com_1010_neg	guajavarin	C20 H18 O11	434.084	7.945	Partial match	No results	Full match	3.73447e+06	5.07395e+06	4.27706e+06	2.91434e+06	2.91912e+06	3.99735e+06	3.30024e+06	8.89501e+06	4.3294e+06	3.65339e+06	5.36961e+06	3.33372e+06	0.793463	-0.333765	0.335283	0.638889	0.275278
Com_1013_neg	MUCIC ACID	C6 H10 O8	210.036	1.387	No results	No results	Invalid mass	1.41698e+07	1.15921e+07	1.65136e+07	1.14179e+07	1.03364e+07	2.53908e+07	2.2328e+07	2.71176e+07	2.39244e+07	1.69727e+07	3.20908e+07	2.10008e+07	0.623425	-0.681713	0.0133684	0.888889	0.749433
Com_1016_neg	2-Methyl-2-propanyl benzyl(4,5-dichlorohexyl)carbamate	C18 H27 Cl2 N O2	359.143	9.455	Full match	No results	No results	4.51419e+06	6.2423e+06	6.32726e+06	5.69669e+06	4.30812e+06	5.66748e+06	5.24971e+06	5.03002e+06	3.22023e+06	2.6706e+06	6.88821e+06	4.45319e+06	1.19061	0.251701	0.216477	0.694444	0.36244
Com_1022_neg	Pinocembrin 漑橄羹	C15 H12 O4	256.072	11.91	No results	No results	Invalid mass	608577	1.49604e+06	979324	1.69533e+07	2.03877e+06	943087	767672	611230	2.34468e+07	1.11628e+06	756569	956787	0.832358	-0.264723	0.796207	0.611111	0.78108
Com_1030_neg	Diethyl [1-(benzyloxy)-5-hydroxy-2-oxo-3-pyrrolidinyl]phosphonate	C15 H22 N O6 P	343.119	7.953	Full match	No results	No results	650452	1.04743e+07	4.47437e+06	3.95262e+06	1.69677e+06	1.21719e+07	7.79483e+06	1.9102e+07	2.89442e+06	2.06857e+06	2.3878e+06	8.03897e+06	0.790329	-0.339474	0.590918	0.555556	0.491141
Com_1032_neg	Myxochlin A	C20 H26 N2 O7	406.174	10.085	Full match	No results	No results	9.87956e+06	1.26825e+07	1.736e+07	1.09233e+07	7.70306e+06	1.30759e+07	8.08487e+06	8.28316e+06	6.7471e+06	7.19673e+06	1.33058e+07	8.17286e+06	1.38296	0.467761	0.0589556	0.777778	0.48128
Com_1038_neg	Etoglucid	C12 H22 O6	262.141	9.714	Full match	No results	No results	1.21383e+06	3.1276e+06	1.79669e+06	1.28988e+06	1.01482e+06	1.6204e+06	1.59021e+06	1.59032e+06	913193	802080	1.56914e+06	1.90843e+06	1.20181	0.265213	0.477983	0.388889	0.292631
Com_103_neg	┒-Lactose	C12 H22 O11	388.12	1.391	No match	Invalid mass	Invalid mass	1.12491e+09	1.47266e+09	1.69075e+09	1.69494e+09	1.75365e+09	4.29771e+08	9.74269e+06	1.92521e+08	1.52121e+07	6.37802e+08	3.48862e+08	1.10755e+09	3.53278	1.8208	0.0413778	0.944444	3.30659
Com_1041_neg	Ceftolozane	C23 H30 N12 O8 S2	666.177	7.615	Full match	No results	No results	1.06362e+06	7.20891e+06	1.11385e+07	1.36773e+07	3.47337e+06	1.2942e+07	4.68756e+06	9.18181e+06	1.31318e+07	5.57211e+06	2.74276e+06	4.86644e+06	1.23197	0.300972	0.938479	0.583333	0.552277
Com_1064_neg	Syringetin	C17 H14 O8	346.068	9.043	Full match	No results	No results	557554	614330	556533	593953	517879	682666	610435	601726	521963	485621	762652	570476	0.991568	-0.012217	0.979424	0.5	0.0709034
Com_1076_neg	longipedumin A	C31 H32 O8	532.209	10.237	Full match	No results	No results	2.029e+06	2.51626e+06	3.83643e+06	1.09376e+07	2.69688e+06	7.01603e+06	1.82988e+07	2.04115e+07	1.23129e+07	9.47815e+06	2.33789e+07	1.90135e+07	0.282157	-1.82543	0.00189113	0.972222	2.12149
Com_1081_neg	Salicin 6-phosphate	C13 H19 O10 P	366.07	7.025	Full match	No results	No results	3.50308e+06	5.3592e+06	6.7206e+06	7.09712e+06	5.08167e+06	9.9445e+06	1.74753e+07	1.49855e+07	1.50777e+07	1.02e+07	2.50759e+07	1.68312e+07	0.378403	-1.40201	0.000401729	1	1.48463
Com_1082_neg	sinapoyltartronic acid	C14 H14 O9	326.062	6.578	Full match	No results	No results	687409	694923	725761	665501	643852	664375	525137	471844	392307	339260	675429	539803	1.38659	0.471544	0.0164839	0.916667	0.536831
Com_1083_neg	Reduced-(S)-usnate	C18 H18 O7	346.104	7.532	Full match	No results	No results	4.77229e+06	5.62765e+06	2.36452e+06	4.31018e+06	2.30626e+06	4.01628e+06	1.18233e+07	2.29677e+06	1.40239e+06	3.07558e+06	3.2376e+06	3.30997e+06	0.930469	-0.10397	0.729229	0.666667	0.207794
Com_1094_neg	Bipinnatin K	C23 H26 O9	446.156	10.977	Full match	No results	No results	1.47254e+06	8.79024e+06	4.28038e+06	4.38906e+06	3.00893e+06	9.68306e+06	5.28663e+06	1.23426e+07	4.64271e+06	1.77333e+06	4.16538e+06	5.58706e+06	0.935693	-0.0958934	0.809466	0.583333	0.150891
Com_109_neg	Ornithine	C5 H12 N2 O2	132.089	1.433	Full match	Full match	No results	1.25785e+08	1.22582e+08	1.05035e+08	9.02046e+07	1.46617e+08	1.39659e+08	4.43648e+07	5.64795e+07	1.93232e+07	2.99852e+07	5.25827e+07	5.57675e+07	2.8235	1.49748	0.000825934	1	1.62335
Com_10_neg	Caffeic acid 3-glucoside	C15 H18 O9	342.094	2.471	Full match	No results	No results	3.42345e+08	1.78783e+09	1.84077e+09	8.33181e+09	8.77925e+08	5.51992e+09	1.74722e+09	2.90858e+09	3.77962e+09	1.36429e+09	4.66103e+09	3.1099e+09	1.06431	0.0899189	0.515644	0.555556	0.525631
Com_1106_neg	5-[(6-O-Benzoyl-D-erythro-hexopyranosyl)oxy]-2-hydroxybenzoic acid	C20 H20 O10	420.104	8.088	Full match	No results	No results	1.77563e+06	1.47677e+06	2.25089e+06	5.74226e+06	1.87818e+06	7.27527e+06	4.2453e+06	5.28607e+06	5.19795e+06	2.67794e+06	4.3587e+06	3.46438e+06	0.808511	-0.306662	0.23254	0.666667	0.585876
Com_1107_neg	Kynurenic acid	C10 H7 N O3	189.042	8.533	Full match	No results	No results	1.16953e+06	1.13754e+06	1.18121e+06	1.00864e+06	1.02587e+06	1.41389e+06	631836	1.31074e+06	879018	464286	1.10954e+06	634826	1.37899	0.463614	0.0646372	0.805556	0.56049
Com_1113_neg	3-(2,6-dihydroxyphenyl)-4-hydroxy-6-methyl-3H-2-benzofuran-1-one	C15 H12 O5	272.067	10.191	No results	No results	Invalid mass	4.83154e+06	1.52677e+07	8.90411e+06	1.36824e+07	5.52842e+06	1.50736e+07	1.3815e+07	5.27956e+06	4.27727e+06	6.37591e+06	2.94005e+06	6.48845e+06	1.61546	0.691948	0.126241	0.75	0.795027
Com_112_neg	glicetanile	C23 H25 Cl N4 O4 S	488.13	8.63	Full match	No results	No results	6.89851e+06	1.95972e+08	1.18649e+08	1.92977e+08	1.89532e+07	4.1212e+08	8.72202e+07	1.98298e+08	2.04205e+08	6.80984e+07	3.72636e+07	7.71985e+07	1.4065	0.492112	0.809621	0.5	0.781421
Com_1132_neg	adenosine 5'-(hexanoyl phosphate)	C16 H24 N5 O8 P	445.136	8.903	Full match	No results	No results	735407	1.09752e+07	5.21081e+06	1.07428e+07	699231	1.73478e+07	5.49551e+06	1.48167e+07	5.52398e+06	2.5534e+06	1.84072e+06	5.06739e+06	1.29502	0.372976	0.868468	0.527778	0.527104
Com_1137_neg	6-Nitro-N-phenyl-4-quinazolinamine	C14 H10 N4 O2	266.081	6.331	Full match	No results	No results	907454	1.18844e+06	1.0029e+06	1.49773e+06	1.97425e+06	1.41665e+06	6.35655e+06	3.02213e+06	2.13426e+06	1.83938e+06	1.85963e+06	2.30926e+06	0.455872	-1.1333	0.0127355	0.944444	1.05811
Com_1152_neg	chaetomugilin G	C24 H29 Cl O7	464.161	9.212	Full match	No results	No results	1.29334e+06	4.44203e+06	4.21742e+06	4.44359e+06	2.07137e+06	4.13501e+06	1.4742e+06	1.84572e+06	1.66448e+06	1.26964e+06	1.86382e+06	2.12273e+06	2.01187	1.00854	0.0329557	0.833333	0.919079
Com_1153_neg	Setipiprant	C24 H19 F N2 O3	402.138	1.398	Full match	No results	No results	6.54064e+06	6.53569e+06	7.03477e+06	6.35326e+06	6.76348e+06	6.60978e+06	5.13885e+06	4.75e+06	3.47305e+06	3.63372e+06	6.28986e+06	5.14575e+06	1.40119	0.486655	0.0113857	1	0.544933
Com_1156_neg	Vanillic acid	C8 H8 O4	168.041	1.899	Not the top hit	Full match	Full match	1.24017e+07	9.17755e+06	1.05416e+07	1.01869e+07	1.09805e+07	1.20556e+07	1.13688e+07	1.3038e+07	1.75606e+07	6.86737e+06	2.66993e+07	1.24202e+07	0.742931	-0.428701	0.3026	0.777778	0.380733
Com_115_neg	D-(+)-Glucose	C6 H12 O6	90.031	1.743	No results	Invalid mass	No results	2.01575e+07	2.43873e+07	2.68848e+07	2.61361e+07	2.2793e+07	2.71623e+07	3.12146e+07	2.49924e+07	2.57027e+07	1.73362e+07	2.78539e+07	2.55915e+07	0.966139	-0.0496968	0.799779	0.583333	0.0637474
Com_1169_neg	Ononin	C22 H22 O9	430.125	10.902	Full match	No results	No results	1.21168e+06	7.64763e+06	3.15742e+06	5.91765e+06	1.15463e+06	1.68065e+07	5.16745e+06	1.84606e+07	3.24177e+06	1.81108e+06	4.3263e+06	2.33111e+06	1.01577	0.022571	0.877819	0.472222	0.283258
Com_1171_neg	(+)-cucurbic acid	C12 H20 O3	212.14	13.127	Full match	No results	No results	5.62701e+06	4.25111e+06	5.82386e+06	4.92873e+06	2.78511e+06	3.76422e+06	2.39751e+07	5.76018e+06	2.4329e+06	3.69427e+06	3.98353e+06	2.20553e+06	0.646351	-0.62961	0.858879	0.611111	0.114593
Com_1172_neg	Paliperidone	C23 H27 F N4 O3	426.208	9.801	Full match	No results	No results	9.10334e+06	4.25751e+06	2.89546e+06	6.0322e+06	5.63786e+06	4.10817e+06	2.93342e+06	4.10163e+06	5.94907e+06	3.04147e+06	9.94375e+06	3.52625e+06	1.08608	0.119129	0.642569	0.611111	0.239751
Com_1174_neg	Ethyl (2E)-8-hydroxy-2-nonenoate	C11 H20 O3	200.14	9.662	Full match	No results	No results	5.08058e+06	7.06194e+06	6.37454e+06	3.53636e+06	4.26206e+06	4.29108e+06	1.11119e+07	6.29441e+06	3.02607e+06	3.55899e+06	4.61495e+06	4.97416e+06	0.91144	-0.133781	0.907439	0.472222	0.155449
Com_117_neg	Sulfuric acid	H2 O4 S	97.9671	1.126	Full match	No results	No results	1.6982e+08	1.98935e+08	2.92286e+08	2.40754e+08	2.51301e+08	1.34341e+08	6.82971e+07	9.56242e+07	3.70818e+07	1.15221e+08	1.68581e+08	1.12799e+08	2.15433	1.10724	0.00937055	0.972222	1.27072
Com_1181_neg	2-(alpha-D-mannosyl)-D-glyceric acid	C9 H16 O9	268.078	15.119	Full match	No results	No results	315648	5.03702e+06	7.70899e+06	6.8169e+06	5.99264e+06	447856	2.51487e+06	224794	1.95948e+06	1.46301e+06	295947	199855	3.95302	1.98296	0.123831	0.833333	2.02489
Com_1184_neg	Delamanid	C25 H25 F3 N4 O6	534.172	9.756	Full match	No results	No results	1.16636e+06	5.6754e+06	3.04157e+06	4.97645e+06	1.94108e+06	6.73982e+06	3.1828e+06	6.65641e+06	4.22045e+06	2.72387e+06	1.39454e+06	3.11655e+06	1.10547	0.144666	0.921053	0.527778	0.424907
Com_1188_neg	(-)-Podophyllotoxin	C22 H22 O8	414.13	12.124	Full match	No results	No results	958917	1.0678e+06	1.02467e+06	920542	959530	917587	589073	550335	486745	431839	821380	682306	1.64222	0.715645	0.00218625	1	0.77421
Com_1198_neg	1-Cyclohexenecarboxylic Acid	C7 H10 O2	126.068	8.728	Full match	No results	No results	3.21228e+06	2.85409e+06	4.81545e+06	8.00056e+06	1.91083e+06	5.9799e+06	3.46458e+06	2.60473e+06	1.8032e+06	2.00317e+06	5.57467e+06	5.07727e+06	1.30425	0.383218	0.414253	0.638889	0.448451
Com_11_neg	2-Deoxypentose	C5 H10 O4	134.057	1.435	Full match	No results	No results	5.50405e+08	9.08666e+08	2.93551e+09	1.10748e+09	5.65865e+08	5.94469e+08	6.46453e+08	8.17628e+08	1.8807e+08	5.96774e+08	2.99113e+08	4.88026e+08	2.19442	1.13384	0.0738005	0.75	1.02507
Com_1202_neg	clindamycin-2-phosphate	C18 H34 Cl N2 O8 P S	504.146	2.565	Full match	No results	No results	3.81644e+06	3.97654e+06	3.65946e+06	3.62427e+06	3.77106e+06	4.40692e+06	2.92213e+06	2.22846e+06	1.85993e+06	1.44178e+06	3.50752e+06	2.54295e+06	1.60347	0.681194	0.010226	1	0.765962
Com_120_neg	zinniol	C15 H22 O4	266.154	13.424	No match	No results	Invalid mass	2.64563e+08	2.44915e+08	4.43142e+08	1.349e+08	1.10043e+08	1.22241e+08	1.37824e+08	6.00591e+07	4.58466e+07	8.86884e+08	6.48584e+07	4.55787e+07	1.06346	0.0887624	0.24221	0.75	1.04306
Com_1217_neg	lixivaptan	C27 H21 Cl F N3 O2	473.13	8.893	Full match	No results	No results	628249	8.87451e+06	2.94426e+06	3.76043e+06	597344	1.38897e+07	2.42421e+06	7.45153e+06	3.5097e+06	2.76454e+06	1.46508e+06	4.15096e+06	1.4102	0.495903	0.839551	0.527778	0.536267
Com_1226_neg	Pyridoxal	C8 H9 N O3	167.057	11.576	Full match	No results	No results	4.76834e+06	6.22225e+06	4.17179e+06	6.00533e+06	4.19319e+06	4.50894e+06	7.71061e+06	2.71639e+06	1.93634e+06	3.36257e+06	4.07428e+06	3.19649e+06	1.29888	0.377264	0.135892	0.833333	0.518512
Com_122_neg	sinapaldehyde glucoside	C17 H22 O9	370.125	9.439	Full match	No results	No results	4.86258e+06	9.4103e+06	1.27847e+07	9.53777e+06	5.30448e+06	2.69999e+07	6.23267e+06	8.95831e+06	8.09762e+06	5.67066e+06	9.76005e+06	1.12758e+07	1.37813	0.462711	0.55294	0.555556	0.27061
Com_1248_neg	3,5-Dihydroxy-4-[(6-O-sulfo-beta-D-glucopyranosyl)oxy]benzoic acid	C13 H16 O13 S	412.029	1.886	Full match	No results	No results	2.39529e+06	1.36275e+06	1.41916e+06	1.23286e+06	1.3904e+06	1.27166e+06	8.95377e+06	3.18689e+06	1.00299e+07	1.26222e+06	9.06298e+06	7.04041e+06	0.229463	-2.12366	0.010618	0.861111	1.96912
Com_124_neg	N-Acetylleucylleucine	C14 H26 N2 O4	286.188	7.27	Full match	No results	No results	1.13889e+09	1.54617e+09	1.5078e+09	1.49909e+09	1.62382e+09	1.50434e+09	6.34238e+08	7.94585e+08	6.08714e+08	6.91179e+08	1.08512e+09	7.86161e+08	1.91742	0.939166	0.000145872	1	0.985185
Com_1252_neg	(2E)-3,7-Dimethyl-2,6-octadien-1-yl beta-D-glucopyranoside	C16 H28 O6	316.187	11.688	Full match	No results	No results	5.76495e+06	5.67566e+06	5.15508e+06	4.19765e+06	6.21325e+06	2.8383e+06	4.44036e+06	4.69243e+06	1.46233e+07	2.03551e+06	3.86969e+06	2.66529e+06	0.923229	-0.11524	0.723146	0.694444	0.235028
Com_1258_neg	1-Naphthol	C10 H8 O	144.057	11.227	Full match	No results	No results	790625	1.42254e+06	708082	635563	700884	896438	757183	2.0203e+07	584240	355856	1.37818e+06	787441	0.214167	-2.22319	0.534868	0.472222	0.657109
Com_1263_neg	1-(4-Pyridinyl)-4-piperidinecarboxamide	C11 H15 N3 O	205.122	7.997	Full match	No results	No results	1.27879e+06	721731	739639	673701	681603	672468	556988	463991	371335	315180	597805	497649	1.70104	0.76642	0.00429228	1	0.78873
Com_1264_neg	(-)-Andrographolide	C20 H30 O5	350.208	10.459	Full match	No results	No results	1.659e+06	1.91159e+06	1.13743e+06	1.20827e+06	1.31317e+06	1.60486e+06	1.01848e+06	1.62154e+06	974363	586115	2.27367e+06	1.35532e+06	1.12834	0.174201	0.389073	0.638889	0.372465
Com_1269_neg	Estramustine	C23 H31 Cl2 N O3	439.168	7.745	Full match	No results	No results	4.50849e+06	4.28003e+06	3.32848e+06	4.71015e+06	3.59725e+06	5.76361e+06	2.53804e+06	3.64311e+06	3.51522e+06	2.62071e+06	4.6205e+06	2.98654e+06	1.31439	0.39439	0.0466607	0.805556	0.414647
Com_1280_neg	Flufenamic Acid	C14 H10 F3 N O2	281.067	12.25	Full match	No results	No results	1.3631e+06	1.47749e+06	738723	696085	505948	569407	1.31135e+06	1.96343e+07	1.73675e+06	338202	2.68847e+06	620047	0.203225	-2.29885	0.265736	0.666667	1.1408
Com_1283_neg	Paeonolide	C20 H28 O12	460.156	9.084	Full match	No results	No results	958186	822822	799931	816853	1.00327e+06	1.23573e+06	3.12752e+06	3.54012e+06	3.25908e+06	2.37051e+06	2.35848e+06	1.34635e+06	0.352254	-1.50531	0.000373581	1	1.49665
Com_128_neg	FG7175000	C9 H7 N O	145.052	5.783	Full match	No results	No results	8.51473e+06	2.11686e+08	5.36586e+07	5.14262e+07	1.17632e+07	1.45763e+08	1.58429e+08	1.00432e+08	2.96696e+07	1.10354e+08	2.32777e+07	1.30819e+08	0.873108	-0.195769	0.457198	0.583333	0.778466
Com_1310_neg	Isofraxidin	C11 H10 O5	222.052	10.361	Full match	No results	No results	725860	2.11044e+06	976025	839738	882637	3.07633e+06	909251	1.24385e+06	642694	1.42016e+06	1.2852e+06	1.54026e+06	1.22291	0.290322	0.763976	0.527778	0.137054
Com_1324_neg	9-Oxononanoic acid	C9 H16 O3	172.109	9.243	Full match	No results	No results	1.45e+07	1.35133e+07	1.26012e+07	1.19698e+07	1.41725e+07	9.49442e+06	5.32231e+06	4.42554e+06	3.0476e+06	2.95695e+06	5.88097e+06	4.79611e+06	2.88509	1.52861	4.96487e-05	1	1.60867
Com_1333_neg	PD123319	C31 H32 N4 O3	508.25	9.89	Full match	No results	No results	3.75722e+06	5.55844e+06	5.18511e+06	5.26725e+06	4.96087e+06	3.88231e+06	1.40147e+07	9.5526e+06	4.29071e+06	4.17518e+06	2.40477e+07	9.7502e+06	0.434615	-1.20219	0.0645648	0.777778	1.15095
Com_1345_neg	Medrogestone	C23 H32 O2	340.241	13.206	Full match	No results	No results	956010	3.05748e+06	2.71133e+06	4.36132e+06	1.32114e+06	4.81563e+06	1.48987e+06	2.0634e+06	1.2134e+06	1.08421e+06	2.00416e+06	1.84513e+06	1.77553	0.828247	0.165321	0.722222	0.666516
Com_1346_neg	Cicutoxin	C17 H22 O2	258.162	10.888	Full match	No results	No results	1.05265e+07	1.25813e+07	1.24625e+07	7.99868e+06	3.1317e+06	1.11075e+07	3.99116e+06	2.04565e+06	5.60203e+06	8.71287e+06	2.34117e+07	1.21503e+07	1.03388	0.0480701	0.586613	0.611111	0.449629
Com_1347_neg	Candesartan	C24 H20 N6 O3	440.16	7.725	Full match	No results	No results	3.82576e+06	3.67531e+06	2.84249e+06	3.82674e+06	2.90257e+06	5.79059e+06	2.5111e+06	2.12449e+06	2.45102e+06	1.70156e+06	3.6043e+06	1.27195e+06	1.67321	0.742621	0.0150067	0.944444	0.808802
Com_1353_neg	Tyrosol	C8 H10 O2	138.068	8.486	Full match	No results	No results	1.72905e+06	2.69962e+06	1.86452e+06	1.7647e+06	2.73846e+06	1.57564e+06	3.16367e+06	3.15195e+06	1.34403e+06	1.42853e+06	2.17438e+06	2.1644e+06	0.921429	-0.118055	0.782506	0.555556	0.207366
Com_1364_neg	FMNH2	C17 H23 N4 O9 P	458.122	6.313	Full match	No results	No results	1.91789e+07	1.7356e+07	1.85873e+07	1.64235e+07	2.537e+07	1.10386e+07	1.15274e+06	1.38395e+06	1.41093e+06	1.88376e+06	2.43445e+06	1.12276e+06	11.4985	3.52337	4.28403e-08	1	3.64528
Com_1368_neg	(6R)-6-Hydroxy-3-(2-hydroxyethyl)-2,4,4-trimethyl-2-cyclohexen-1-one	C11 H18 O3	198.125	5.943	Full match	No results	No results	1.23496e+06	1.2057e+06	1.54795e+06	1.33699e+06	731813	1.44227e+06	1.42019e+06	636490	475355	629992	1.5278e+06	1.44132e+06	1.22321	0.290672	0.273572	0.638889	0.511928
Com_1369_neg	alpkinidine	C19 H13 N3 O3	331.096	1.863	Full match	No results	No results	7.6941e+06	2.80161e+06	3.86285e+06	3.41018e+06	8.80111e+06	3.22904e+06	3.25152e+06	1.02347e+07	9.60847e+06	4.11117e+06	2.28622e+07	6.00357e+06	0.531444	-0.912011	0.174104	0.777778	0.880096
Com_136_neg	Benzyl sulfone	C14 H14 O2 S	246.073	1.427	Full match	No results	No results	1.20241e+08	4.26638e+08	3.47494e+08	1.5586e+08	2.07531e+08	3.51081e+08	3.38857e+08	4.19243e+08	9.27036e+07	1.70268e+08	1.93088e+08	2.26858e+08	1.11646	0.158936	0.697744	0.583333	0.193111
Com_1372_neg	clazolam	C18 H17 Cl N2 O	312.104	11.478	Full match	No results	No results	1.77925e+06	1.31833e+06	1.47563e+06	1.40156e+06	1.36235e+06	1.24783e+06	1.3877e+06	1.25174e+06	1.10994e+06	681738	1.38833e+06	822825	1.29247	0.370132	0.0675594	0.805556	0.424815
Com_1383_neg	Spiraprilat	C20 H26 N2 O5 S2	438.127	7.894	Full match	No results	No results	5.87204e+06	9.27173e+06	4.84854e+06	5.91905e+06	4.32656e+06	6.1929e+06	3.94519e+06	5.43377e+06	4.44053e+06	4.00925e+06	7.15272e+06	7.61226e+06	1.11773	0.160566	0.479907	0.638889	0.225221
Com_1397_neg	Jasmonal	C14 H18 O	202.135	7.995	Full match	No results	No results	629961	644866	660866	601951	609011	600850	414487	414575	331788	281613	534138	444649	1.54776	0.630178	0.00386123	1	0.685208
Com_139_neg	avicularin	C20 H18 O11	434.084	9.902	Partial match	No results	Full match	6.47889e+08	1.19414e+09	1.40125e+09	3.2402e+08	8.90391e+08	2.6529e+08	1.19418e+08	1.06806e+08	1.29916e+08	1.11799e+08	1.28686e+08	6.61339e+07	7.12624	2.83314	0.000736026	1	2.69405
Com_1416_neg	Salidroside	C14 H20 O7	300.12	6.944	Full match	No results	No results	4.68474e+06	4.83113e+06	5.75e+06	6.94468e+06	5.03004e+06	6.58652e+06	4.36513e+06	7.39513e+06	1.13035e+07	7.38579e+06	1.35626e+07	6.1806e+06	0.673945	-0.569297	0.107052	0.777778	0.501409
Com_1417_neg	Haloperidol decanoate	C31 H41 Cl F N O3	529.274	8.709	Full match	No results	No results	482869	651957	583981	1.12138e+06	449567	1.11786e+06	341690	333902	279199	223717	1.61499e+06	747408	1.24477	0.31588	0.265629	0.722222	0.725816
Com_1419_neg	p-t-Butylbenzaldehyde	C11 H14 O	162.104	8.731	Full match	No results	No results	1.54833e+06	1.25899e+06	2.0769e+06	4.62926e+06	851711	3.77077e+06	1.75297e+06	1.21295e+06	698155	808642	3.42926e+06	2.77282e+06	1.32424	0.405161	0.476624	0.666667	0.542132
Com_1420_neg	Homovanillic acid	C9 H10 O4	182.061	9.774	No match	Invalid mass	No results	757645	1.54766e+06	1.39312e+06	3.06302e+06	1.02812e+06	2.10032e+06	1.24183e+06	1.71028e+06	749705	1.0047e+06	1.52701e+06	1.952e+06	1.20822	0.272881	0.598789	0.611111	0.239657
Com_1431_neg	6,7,8-Trihydroxy-2H-chromen-2-one	C9 H6 O5	194.021	7.14	Full match	No results	No results	2.52988e+06	1.74012e+06	2.29004e+06	1.93355e+06	2.24343e+06	1.9749e+06	1.68864e+06	1.36196e+06	1.41727e+06	1.26062e+06	2.85208e+06	1.76806e+06	1.22837	0.296743	0.11631	0.805556	0.401446
Com_1433_neg	(20S)-Protopanaxadiol	C30 H52 O3	460.39	14.21	Full match	No results	No results	1.01867e+07	1.13594e+07	8.75701e+06	1.10233e+07	1.23126e+07	1.18587e+07	1.24962e+07	8.62651e+06	1.08908e+07	6.86192e+06	1.23821e+07	9.92497e+06	1.07053	0.098328	0.459551	0.583333	0.131121
Com_1448_neg	5-Nitro-7,11-diazatricyclo[7.3.1.0~2,7~]trideca-2,4-dien-6-one	C11 H13 N3 O3	235.096	10.171	Full match	No results	No results	7.13097e+06	6.29042e+06	4.00536e+06	2.82993e+06	6.04993e+06	5.05748e+06	3.63264e+06	2.06318e+06	1.70857e+06	966094	1.91767e+06	1.14705e+06	2.74277	1.45563	0.00151143	0.972222	1.57432
Com_1461_neg	yatein	C22 H24 O7	400.151	10.426	Full match	No results	No results	580049	3.63013e+06	1.29663e+06	2.21297e+06	554131	7.45912e+06	1.26641e+06	2.64512e+06	1.54971e+06	727229	650607	1.44919e+06	1.89823	0.924654	0.512022	0.555556	0.687735
Com_1469_neg	Phosphomevalonic acid	C6 H13 O7 P	228.041	8.209	Full match	No results	No results	902165	1.26191e+06	1.15545e+06	1.39339e+06	1.35354e+06	1.1844e+06	1.20849e+06	1.35356e+06	1.0754e+06	764538	1.40744e+06	985743	1.06706	0.0936404	0.518033	0.555556	0.132696
Com_1475_neg	Plantamajoside	C29 H36 O16	640.2	8.789	Full match	No results	No results	617774	1.86302e+06	934774	1.27774e+06	599086	4.92646e+06	885349	1.75281e+06	4.52452e+06	863824	769332	1.43354e+06	0.998972	-0.00148418	0.848172	0.527778	0.595229
Com_1478_neg	C1'-C9-Glycosylated UWM6	C25 H28 O9	472.172	11.519	Full match	No results	No results	538651	589934	644311	797570	543790	1.34039e+06	644054	1.08062e+06	569293	257600	480363	411547	1.29365	0.371443	0.251416	0.722222	0.463404
Com_1480_neg	2-Phenylethyl 6-O-beta-D-xylopyranosyl-beta-D-glucopyranoside	C19 H28 O10	416.167	9.718	Full match	No results	No results	3.62119e+06	2.6289e+06	1.65018e+06	3.39692e+06	1.60585e+06	2.09337e+06	1.65035e+06	3.99246e+06	2.01873e+06	1.1362e+06	1.62963e+06	1.42477e+06	1.26529	0.33947	0.260146	0.694444	0.407368
Com_1486_neg	Dibutyl phthalate	C16 H22 O4	278.15	12.375	Invalid mass	No results	No results	2.35369e+06	4.96975e+06	6.21006e+06	5.19273e+06	4.77893e+06	2.3898e+06	1.09603e+06	4.18439e+06	2.41402e+06	3.18555e+06	4.49838e+06	3.71214e+06	1.35643	0.439816	0.256357	0.722222	0.528087
Com_1491_neg	Aloeresin A	C28 H28 O11	540.165	10.547	Full match	No results	No results	1.8476e+07	4.55567e+06	6.32507e+06	4.532e+06	5.28676e+06	2.79811e+06	1.04651e+06	705344	552785	423990	1.43105e+06	1.29373e+06	7.69677	2.94425	0.000186459	1	2.88119
Com_1494_neg	23-acetoxy-12-epi-deoxoscalarin	C29 H44 O6	488.311	10.166	Full match	No results	No results	2.78839e+06	3.133e+06	2.98158e+06	3.78647e+06	4.34514e+06	2.86396e+06	1.32565e+06	1.22454e+06	1.08746e+06	715436	1.90799e+06	1.26774e+06	2.64298	1.40217	0.000164744	1	1.48337
Com_149_neg	Phenylacetylene	C8 H6	102.047	9.44	Full match	No results	No results	7.95079e+06	1.29866e+07	1.24184e+07	1.3563e+07	7.60744e+06	2.67113e+07	9.54634e+06	9.81801e+06	9.74688e+06	7.2023e+06	1.35844e+07	1.28277e+07	1.29512	0.37309	0.395649	0.611111	0.279804
Com_1502_neg	Streptamine 4-phosphate	C6 H15 N2 O7 P	258.062	8.52	Full match	No results	No results	870000	1.32076e+06	1.15964e+06	1.10005e+06	1.00822e+06	1.39948e+06	2.53906e+06	1.1652e+07	1.88772e+06	2.08003e+06	1.18361e+07	1.53593e+06	0.217506	-2.20087	0.0284335	1	1.77624
Com_1503_neg	4-amino-2-hydroxyamino-6-nitrotoluene	C7 H9 N3 O3	183.065	10.895	Full match	No results	No results	529391	2.34205e+06	2.1045e+06	3.8543e+06	579673	6.64645e+06	5.26528e+06	5.15913e+06	4.05156e+06	2.52841e+06	5.56645e+06	4.29037e+06	0.597753	-0.742379	0.0955387	0.805556	1.27162
Com_1506_neg	Pruvanserin	C22 H21 F N4 O	376.172	8.477	Full match	No results	No results	4.33047e+06	7.82345e+06	4.50043e+06	3.4332e+06	5.2115e+06	4.42884e+06	3.59613e+06	4.9783e+06	5.70524e+06	2.77173e+06	4.57071e+06	3.64752e+06	1.17643	0.234413	0.336354	0.583333	0.235265
Com_1514_neg	Swertianolin	C20 H20 O11	436.099	6.313	Full match	No results	No results	2.67093e+06	2.268e+06	2.67759e+06	2.68829e+06	2.33624e+06	2.26843e+06	3.17472e+06	2.71047e+06	1.99799e+06	2.35835e+06	4.68717e+06	3.76338e+06	0.797636	-0.326197	0.20622	0.75	0.411546
Com_1515_neg	lobechidine A	C14 H27 N O3	257.198	13.07	Full match	No results	No results	4.65832e+06	1.3508e+06	3.28447e+06	885050	1.12734e+06	1.00403e+06	1.45204e+06	678213	890375	797827	1.01856e+06	583244	2.27111	1.1834	0.0734679	0.805556	0.966167
Com_1521_neg	Sakuranin	C22 H24 O10	448.135	11.674	Full match	No results	No results	492658	497718	480052	454945	462347	452298	310391	421142	235576	209384	406032	348849	1.47047	0.556273	0.015517	1	0.632612
Com_1529_neg	[(2-Nitrophenyl)sulfanyl]acetic acid	C8 H7 N O4 S	213.009	8.001	Full match	No results	No results	739191	1.26358e+06	2.21622e+06	1.18605e+06	714609	1.96264e+06	1.19998e+06	1.05993e+06	691763	590089	626753	1.34816e+06	1.46507	0.550965	0.189523	0.75	0.511824
Com_152_neg	2-hydroxyquinoline	C9 H7 N O	145.052	7.589	Partial match	No results	Full match	1.33e+07	2.73479e+08	1.83478e+08	1.79455e+08	2.75977e+07	4.47796e+08	1.66294e+08	4.50326e+08	1.30592e+08	5.76015e+07	5.16844e+07	3.46519e+08	0.935238	-0.0965951	0.647357	0.472222	0.540294
Com_1532_neg	1-O-(indol-3-ylacetyl)-beta-D-glucose	C16 H19 N O7	337.115	8.355	Full match	No results	No results	1.4991e+06	1.05621e+06	1.32369e+06	1.45448e+06	968426	1.24682e+06	854496	1.39062e+06	1.04999e+06	579311	2.65792e+06	1.06998e+06	0.992952	-0.0102043	0.674885	0.638889	0.31537
Com_153_neg	trans-Cinnamic acid	C9 H8 O2	148.052	9.439	Full match	Full match	No results	6.41341e+06	1.03939e+07	1.10563e+07	1.05504e+07	6.0898e+06	2.2792e+07	7.93687e+06	8.04604e+06	8.12454e+06	5.99471e+06	1.12149e+07	1.07241e+07	1.29313	0.370864	0.439558	0.583333	0.263975
Com_1542_neg	LAPPAOL C	C30 H34 O10	554.213	10.101	Full match	No results	No results	4.92898e+06	4.02118e+06	3.26917e+06	4.13049e+06	3.79271e+06	4.79427e+06	5.27107e+06	3.54268e+06	4.90746e+06	3.584e+06	1.30413e+07	1.3893e+07	0.563677	-0.827058	0.161857	0.694444	0.76772
Com_154_neg	4-Oxoproline	C5 H7 N O3	129.042	1.416	Not the top hit	Full match	No results	2.4771e+08	2.7642e+08	2.55913e+08	3.2467e+08	2.74143e+08	3.61762e+08	2.2885e+08	2.19032e+08	1.44643e+08	1.13073e+08	1.91884e+08	2.52023e+08	1.51423	0.598587	0.0150333	0.972222	0.658516
Com_1550_neg	2,3-Dihydroxyolean-12-ene-23,28-dioic acid	C30 H46 O6	502.327	10.754	Full match	No results	No results	3.40382e+06	4.35942e+06	2.68967e+06	3.64094e+06	3.99381e+06	3.36268e+06	1.40621e+06	1.58488e+06	3.06667e+06	1.75773e+06	1.15949e+07	2.35828e+06	0.985375	-0.0212558	0.40061	0.805556	0.528275
Com_1561_neg	Ethinylestradiol sulfonate	C23 H30 O4 S	402.188	10.849	Full match	No results	No results	1.42216e+06	2.36486e+06	1.90131e+06	1.49173e+06	1.78147e+06	1.34316e+06	2.72824e+06	4.44001e+06	2.73737e+06	2.8869e+06	4.31683e+06	2.6129e+06	0.52249	-0.936525	0.000702292	1	0.976305
Com_1568_neg	Kynurenine	C10 H12 N2 O3	208.084	7.266	Full match	No results	No results	2.78676e+06	3.44142e+06	3.05297e+06	2.56156e+06	2.82729e+06	3.34688e+06	4.06335e+06	2.97646e+06	3.13563e+06	1.95575e+06	4.07596e+06	3.14224e+06	0.931135	-0.102937	0.696238	0.638889	0.127249
Com_1580_neg	10-Hydroxydecanoic acid	C10 H20 O3	188.14	8.618	Full match	No results	No results	2.41769e+06	3.22012e+06	2.96892e+06	2.41357e+06	1.73527e+06	3.3045e+06	2.94643e+06	3.29794e+06	2.5406e+06	1.38106e+06	3.01508e+06	3.28711e+06	0.975216	-0.0362062	0.957736	0.555556	0.107437
Com_15_neg	(+)-Catechin hydrate (+)-랏꿱羹	C15 H14 O6	290.078	6.993	Partial match	No results	Full match	8.73523e+08	1.37074e+09	2.8621e+09	3.55717e+09	8.29723e+08	2.25228e+09	5.74427e+09	6.13753e+09	4.33361e+09	3.98724e+09	7.56146e+09	7.1775e+09	0.336147	-1.57283	0.00329892	1	1.8294
Com_160_neg	Salicylic acid	C7 H6 O3	138.031	5.816	Full match	Full match	Full match	1.17494e+08	3.73696e+08	1.90043e+08	1.57138e+08	1.26752e+08	3.08137e+08	2.87257e+08	2.90112e+08	1.28353e+08	1.84027e+08	1.88017e+08	2.37723e+08	0.9679	-0.0470708	0.706499	0.555556	0.133755
Com_1613_neg	Allopregnanolone	C21 H34 O2	318.256	14.62	Full match	No results	No results	1.15962e+07	1.52072e+07	1.59685e+07	1.50892e+07	1.58807e+07	1.34816e+07	4.51884e+06	6.15043e+06	5.41654e+06	4.22621e+06	7.70771e+06	5.78702e+06	2.58006	1.3674	1.42705e-05	1	1.4263
Com_1615_neg	IN00150	C18 H16 O6	328.093	7.529	Full match	No results	No results	1.44181e+06	2.3275e+06	674433	1.60112e+06	845960	2.03743e+06	4.25325e+06	778024	609742	1.32735e+06	933791	1.22158e+06	0.978575	-0.0312456	0.735807	0.638889	0.189628
Com_1619_neg	(~232~Th)Thorium	Th	232.039	7.031	Full match	No results	No results	1.28017e+06	956928	1.01714e+06	1.01783e+06	1.70923e+06	1.22481e+06	5.98964e+06	5.18017e+06	5.65656e+06	6.86002e+06	1.03651e+07	7.56648e+06	0.173149	-2.52991	1.76325e-07	1	2.62605
Com_1630_neg	(4-Azidophenyl)methanol	C7 H7 N3 O	149.06	8.733	Full match	No results	No results	1.00908e+06	757252	1.64476e+06	3.63765e+06	598454	1.80571e+06	1.31777e+06	876449	500712	405619	2.64252e+06	2.12267e+06	1.20178	0.265173	0.603445	0.583333	0.598017
Com_1642_neg	Amrubicin	C25 H25 N O9	483.151	11.427	Full match	No results	No results	468134	498565	483080	443760	456458	715842	294502	362495	399825	207247	385489	410918	1.48793	0.573305	0.0118922	1	0.608322
Com_1643_neg	Nandrolone	C18 H26 O2	274.194	11.886	Full match	No results	No results	1.81739e+06	5.29011e+06	1.89871e+06	1.49228e+06	2.00383e+06	1.86694e+06	5.08741e+06	4.58733e+06	2.7411e+06	3.42599e+06	2.67055e+06	3.08152e+06	0.665431	-0.587639	0.0549971	0.833333	0.710967
Com_1653_neg	(2,3,4-Trimethoxy-6-octanoylphenyl)acetaldehyde	C19 H28 O5	336.192	11.318	Full match	No results	No results	673618	757087	697095	667272	645647	687213	421036	446733	354536	298376	597316	481612	1.58791	0.667125	0.0037866	1	0.726516
Com_1661_neg	(2E,4Z)-2,4-Octadienal	C8 H12 O	124.088	8.732	Full match	No results	No results	1.42345e+06	1.55133e+06	2.20037e+06	3.37995e+06	1.43578e+06	3.22812e+06	1.90476e+06	1.4755e+06	777569	382642	3.33564e+06	2.17758e+06	1.31484	0.394889	0.276656	0.638889	0.744992
Com_1676_neg	Chartreusin	C32 H32 O14	640.178	10.6	Full match	No results	No results	1.02437e+06	1.89041e+06	2.42415e+06	1.25352e+07	2.23198e+06	1.52062e+07	2.7377e+06	2.27517e+06	2.29281e+06	1.14005e+06	2.98814e+06	1.6073e+06	2.70776	1.4371	0.294963	0.555556	0.847869
Com_1685_neg	L-(+)-Tartaric acid	C4 H6 O6	150.016	15.015	Full match	Full match	No results	2.45969e+06	2.17663e+06	3.78029e+06	2.9456e+06	2.91682e+06	2.06303e+06	1.16445e+06	1.14643e+06	1.09539e+06	604657	1.29476e+06	936358	2.61806	1.3885	6.35838e-05	1	1.43677
Com_1708_neg	Lusitanicoside	C21 H30 O10	442.182	10.995	Full match	No results	No results	654017	728366	726872	671945	631140	786864	516994	505770	401193	325000	632565	531555	1.4415	0.527572	0.00870129	0.972222	0.576909
Com_1724_neg	Rollicosin	C22 H36 O6	396.25	12.328	Full match	No results	No results	500498	877370	517170	474889	471369	464528	638513	302462	463387	703538	1.0878e+06	615455	0.867406	-0.20522	0.644722	0.583333	0.238483
Com_1725_neg	Estra-1,3,5(10)-trien-3-ol	C18 H24 O	256.183	11.883	Full match	No results	No results	1.1297e+06	3.42686e+06	1.18574e+06	889006	1.29259e+06	1.20046e+06	3.65077e+06	3.15905e+06	2.03312e+06	2.49794e+06	1.89925e+06	2.23557e+06	0.589592	-0.76221	0.0240992	0.861111	0.90812
Com_1730_neg	2,2'-Bis(benzyloxy)-1,1'-binaphthalene	C34 H26 O2	466.195	10.746	Full match	No results	No results	2.52816e+06	4.05575e+06	2.92942e+06	2.10703e+06	2.39776e+06	3.71395e+06	3.52403e+06	6.00776e+06	4.98517e+06	3.88788e+06	7.76926e+06	3.47082e+06	0.598148	-0.741425	0.0157103	0.861111	0.742457
Com_173_neg	5-Hydroxyindole-3-acetic acid	C10 H9 N O3	191.058	7.579	Full match	Full match	No results	9.45213e+06	2.33948e+08	1.48356e+08	1.55639e+08	2.09007e+07	3.83294e+08	1.43972e+08	3.72555e+08	1.12866e+08	5.15757e+07	3.92651e+07	2.91737e+08	0.940334	-0.0887547	0.620593	0.5	0.617343
Com_1740_neg	dermacozine E	C23 H16 N4 O3	396.123	9.447	Full match	No results	No results	1.30366e+06	1.50622e+06	1.40752e+06	1.36359e+06	1.31232e+06	1.3285e+06	1.01616e+06	970615	862592	731250	1.2816e+06	964918	1.41095	0.496669	0.00423754	1	0.534478
Com_1749_neg	Demethylwedelolactone 혼솖蹉診앞코焦	C15 H8 O7	300.032	10.691	No match	No results	Invalid mass	1.30491e+06	2.58019e+06	1.35732e+06	1.47712e+06	1.30113e+06	1.36967e+06	931295	501901	622925	488319	686435	685978	2.39742	1.26148	0.000148712	1	1.28557
Com_174_neg	L-Threonic acid-1,4-lactone	C4 H6 O4	118.026	1.412	Not the top hit	Full match	No results	1.27106e+08	1.62177e+08	1.28097e+08	2.17711e+08	1.2696e+08	1.47596e+08	6.11469e+07	1.12647e+08	7.003e+07	8.23768e+07	1.48257e+08	1.36011e+08	1.49008	0.575389	0.035719	0.805556	0.659983
Com_1766_neg	4-Hydroxy-5-methyl-3-tetradecyldihydro-2(3H)-furanone	C19 H36 O3	312.265	13.857	Full match	No results	No results	1.6346e+06	983377	1.37824e+06	1.47488e+06	1.61229e+06	1.36234e+06	6.2468e+06	1.27022e+06	1.54223e+06	524102	989473	1.42526e+06	0.703923	-0.50651	0.914231	0.583333	0.082926
Com_1771_neg	Naldemedine	C32 H34 N4 O6	570.245	10.889	Full match	No results	No results	1.58589e+06	2.0693e+06	1.249e+06	1.46485e+06	998478	2.38073e+06	2.58095e+06	1.56397e+06	891406	1.63638e+06	1.93377e+06	2.03028e+06	0.916469	-0.125842	0.691303	0.583333	0.161485
Com_178_neg	2-Hydroxycinnamic acid	C9 H8 O3	164.047	3.219	Not the top hit	Full match	Full match	4.93481e+07	1.20049e+08	6.9489e+07	5.50733e+07	6.78667e+07	8.64527e+07	2.51678e+08	2.30698e+08	1.04257e+08	1.17205e+08	9.92544e+07	1.41495e+08	0.474577	-1.07529	0.00709851	0.916667	1.06828
Com_1795_neg	NNK	C10 H13 N3 O2	207.101	9.03	Full match	No results	No results	707733	986115	1.36545e+06	2.3516e+06	657372	1.44047e+06	760897	763802	623955	616425	1.88536e+06	1.30842e+06	1.26009	0.333532	0.424462	0.666667	0.41943
Com_1803_neg	(-)-pinellic acid	C18 H34 O5	330.239	10.719	Full match	No results	No results	1.69262e+06	3.45347e+06	2.02297e+06	2.70347e+06	1.51143e+06	2.01184e+06	1.93646e+06	1.19261e+06	865170	866500	1.88013e+06	1.26568e+06	1.6731	0.742527	0.0206386	0.888889	0.789065
Com_1812_neg	Hydrocortisone Valerate	C26 H38 O6	446.265	13.246	Full match	No results	No results	663967	604016	613985	519941	584392	736911	1.27612e+06	4.09964e+06	1.41621e+06	344152	1.70684e+06	567107	0.395663	-1.33766	0.135118	0.694444	0.954387
Com_1814_neg	N,N'-1,4-Phenylenebis(1,1-diphenylmethanimine)	C32 H24 N2	436.193	11.024	Full match	No results	No results	1.13056e+07	2.29595e+06	1.9965e+06	1.68147e+06	2.97051e+06	4.3307e+06	2.56986e+06	4.16378e+06	888203	815603	2.79993e+06	1.54153e+06	1.92354	0.943764	0.166444	0.722222	0.894626
Com_1825_neg	Adenylthiomethylpentose	C11 H15 N5 O3 S	297.088	8.001	Full match	No results	No results	1.79298e+06	1.50521e+06	1.16919e+06	1.24665e+06	1.59284e+06	1.85191e+06	642175	316871	238726	171510	846414	576956	3.2796	1.71352	0.00265646	1	1.97643
Com_1832_neg	Di-2,5-cyclohexadien-1-yl(octyl)silane	C20 H32 Si	300.228	13.096	Full match	No results	No results	1.26835e+06	877579	1.36711e+06	949656	945736	1.62098e+06	8.46318e+06	922244	2.17793e+06	622043	1.44838e+06	1.13539e+06	0.475952	-1.07111	0.410876	0.583333	0.509273
Com_1843_neg	4-Bromo-N-ethyl-N,2-dimethylaniline	C10 H14 Br N	227.031	12.231	Full match	No results	No results	2.79333e+06	2.77061e+06	3.57051e+06	3.3225e+06	4.87749e+06	1.24421e+07	1.6017e+06	1.46344e+06	852236	887216	2.65652e+06	1.24629e+06	3.41967	1.77386	0.00320458	1	1.69612
Com_1849_neg	1-(4,6-Dimethoxy-1-benzofuran-2-yl)ethanone	C12 H12 O4	220.073	8.703	Full match	No results	No results	9.96656e+06	5.06969e+06	6.13189e+06	7.74099e+06	6.99444e+06	1.36724e+06	552085	556388	254688	307826	568201	814885	12.2036	3.60924	7.75443e-05	1	3.59759
Com_184_neg	Phenol	C6 H6 O	94.0416	1.295	Full match	No results	No results	7.95492e+08	8.11694e+08	8.36363e+08	9.46684e+08	8.95014e+08	8.63563e+08	6.22628e+08	6.22933e+08	4.37729e+08	3.89043e+08	7.94395e+08	6.64686e+08	1.458	0.543993	0.0134051	1	0.615403
Com_1851_neg	grandidentatin	C21 H28 O9	424.173	8.487	Full match	No results	No results	2.19394e+06	2.11892e+06	3.20419e+06	3.04055e+06	2.02796e+06	2.96228e+06	2.21402e+06	3.15947e+06	1.99508e+06	1.94835e+06	1.543e+06	1.79792e+06	1.22832	0.296684	0.132538	0.777778	0.343
Com_1854_neg	2-ACETYL-2-DECARBAMOYLOXYTETRACYCLINE	C23 H25 N O9	459.151	11.381	Full match	No results	No results	567157	576982	593700	555933	565175	545616	371922	357672	280423	253669	472653	407807	1.58784	0.667067	0.00357593	1	0.726426
Com_1861_neg	Buclizine	C28 H33 Cl N2	432.235	9.22	Full match	No results	No results	1.2505e+06	1.02529e+06	722310	702052	1.18644e+06	775589	1.05585e+06	972240	863338	684790	1.04066e+06	525319	1.10112	0.138971	0.538318	0.388889	0.1465
Com_1863_neg	5-(Chlorocarbonyl)-5-hexen-1-yl 4-chlorobenzoate	C14 H14 Cl2 O3	300.032	13.852	Full match	No results	No results	3.02044e+06	3.602e+06	3.02341e+06	3.34017e+06	3.7142e+06	2.94917e+06	1.72896e+06	1.6881e+06	1.33788e+06	1.34283e+06	2.21677e+06	1.34974e+06	2.0332	1.02375	8.56192e-05	1	1.07269
Com_1877_neg	10-Undecyn-1-yl benzenesulfonate	C17 H24 O3 S	308.144	8.059	Full match	No results	No results	1.03704e+07	5.61327e+06	5.22233e+06	6.38409e+06	6.23443e+06	4.93641e+06	2.75372e+06	1.654e+06	1.1216e+06	835758	3.16564e+06	1.73584e+06	3.44035	1.78256	0.000648575	1	1.94563
Com_1895_neg	Ricinoleic Acid	C18 H34 O3	298.25	11.891	Full match	No results	No results	544106	774298	835898	983786	592472	1.04693e+06	499140	846711	359054	338301	777267	644312	1.37887	0.463489	0.0993559	0.75	0.541009
Com_190_neg	3-(1H-Imidazol-4-yl)-2-oxopropyl phosphate	C6 H7 N2 O5 P	218.009	1.533	Full match	No results	No results	4.78409e+07	7.58508e+07	1.24008e+08	2.0171e+08	5.82657e+07	1.7044e+08	3.51976e+07	3.90347e+07	2.76679e+07	4.76176e+07	5.18018e+07	5.60075e+07	2.63522	1.39792	0.0141381	0.944444	1.27493
Com_1924_neg	8-Bromo-2,6-dimethyl-2-octene	C10 H19 Br	218.068	6.721	Full match	No results	No results	1.07541e+06	1.19503e+06	1.44852e+06	1.42899e+06	1.06047e+06	1.31475e+06	1.97224e+06	1.94401e+06	1.64336e+06	1.27772e+06	2.44013e+06	1.73609e+06	0.683084	-0.549865	0.00699187	0.916667	0.575303
Com_1931_neg	Velloquercetin	C20 H16 O7	368.091	6.036	Full match	No results	No results	676267	664272	1.27776e+06	593806	626556	900397	6.04342e+06	3.73478e+06	2.88911e+06	2.0424e+06	5.69717e+06	4.08656e+06	0.193483	-2.36972	2.55632e-05	1	2.44281
Com_1932_neg	aplidiopsamine A	C17 H13 N7	315.122	9.71	Full match	No results	No results	4.01238e+06	3.1083e+06	3.96147e+06	4.05782e+06	3.28662e+06	2.38678e+06	3.70869e+06	2.63198e+06	2.1172e+06	1.56317e+06	6.42266e+06	3.00012e+06	1.07044	0.098199	0.498524	0.694444	0.442376
Com_1944_neg	MFCD00041564	C11 H22 O3	202.156	12.289	Full match	No results	No results	1.48436e+06	1.71463e+06	1.70963e+06	1.12598e+06	1.50713e+06	1.59821e+06	1.09298e+06	659157	660106	700142	849416	518072	2.04022	1.02873	0.000285822	1	1.0911
Com_1951_neg	callystatin A	C29 H44 O4	456.322	12.453	Full match	No results	No results	794992	836500	807186	769092	780330	764676	485127	468824	832276	348565	1.80142e+06	561770	1.05665	0.0794937	0.403066	0.694444	0.387199
Com_1952_neg	(3S,6R)-3,6-Dihydroxy-10-methylundecanoic acid	C12 H24 O4	232.166	9.84	Full match	No results	No results	905506	2.14326e+06	2.7409e+06	899619	1.42282e+06	1.48663e+06	3.59423e+06	2.32627e+06	885068	968887	2.35471e+06	1.88828e+06	0.798734	-0.324214	0.524315	0.611111	0.426079
Com_1954_neg	Auriculoside	C22 H26 O10	450.153	6.408	Full match	No results	No results	7.18556e+06	9.71163e+06	4.85599e+06	4.5239e+06	5.52652e+06	4.44056e+06	1.34468e+06	1.59287e+06	1.08132e+06	1.02006e+06	2.98287e+06	1.56019e+06	3.78253	1.91935	6.57721e-05	1	2.01361
Com_195_neg	Indole-3-carbidol	C9 H9 N O	147.068	7.594	Full match	No results	No results	3.51666e+06	1.62415e+08	8.65027e+07	9.04424e+07	1.06801e+07	2.34967e+08	8.49027e+07	2.27518e+08	6.99088e+07	2.87995e+07	2.45666e+07	1.17073e+08	1.06468	0.090426	0.629511	0.527778	0.688591
Com_1968_neg	L-(-)-Serine	C3 H7 N O3	105.042	2.362	Full match	No results	No results	4.45184e+06	4.97839e+06	2.19092e+06	4.68984e+06	3.08378e+06	6.34485e+06	2.88932e+06	2.64946e+06	2.17097e+06	1.34772e+06	2.50485e+06	2.57318e+06	1.82092	0.864667	0.0153583	0.888889	0.851185
Com_1975_neg	butanilicaine	C13 H19 Cl N2 O	254.117	10.156	Full match	No results	No results	1.11237e+06	2.0506e+06	1.71115e+06	931999	1.34975e+06	846616	1.15817e+06	1.51795e+06	1.59205e+06	2.36486e+06	1.71417e+06	1.76869e+06	0.79108	-0.338104	0.158602	0.75	0.397858
Com_1978_neg	MFCD00078645	C5 H8 Cl N5	173.047	10.742	Full match	No results	No results	1.8327e+06	2.94791e+06	2.08392e+06	2.3331e+06	2.03061e+06	2.30888e+06	1.56442e+06	2.60365e+06	965157	795643	1.75331e+06	1.96373e+06	1.40341	0.488932	0.0792189	0.833333	0.623385
Com_1990_neg	Izonsteride	C24 H26 N2 O S2	422.148	12.086	Full match	No results	No results	3.26956e+06	4.39675e+06	4.26263e+06	2.18682e+06	3.85944e+06	4.33113e+06	3.57159e+06	2.29698e+06	5.10571e+06	1.70642e+06	2.57004e+06	4.3755e+06	1.13656	0.184669	0.422296	0.583333	0.261758
Com_19_neg	D-(-)-Fructose	C6 H12 O6	90.0314	1.744	No match	Invalid mass	No results	1.04885e+09	1.19342e+09	1.26157e+09	1.75862e+09	1.12428e+09	1.18128e+09	8.32644e+08	7.30058e+08	5.44931e+08	5.15818e+08	8.92547e+08	7.97732e+08	1.7544	0.81098	0.000887023	1	0.846747
Com_2001_neg	Ethyl 1-(4-ethoxyphenyl)-4-hydroxy-1H-pyrazole-3-carboxylate	C14 H16 N2 O4	276.111	8.159	Full match	No results	No results	984935	918305	1.54322e+06	1.18265e+06	865635	1.20588e+06	733441	1.07344e+06	924572	466086	954831	1.4467e+06	1.19674	0.25911	0.261014	0.666667	0.34637
Com_2010_neg	Cucurbitacin S	C30 H42 O6	498.296	12.951	Full match	No results	No results	494417	534682	535818	469881	487655	474690	323847	300547	264289	221041	687837	370009	1.38272	0.467509	0.0569304	0.833333	0.627576
Com_2012_neg	4-(3,5-Difluorophenyl)-1H-1,2,3-triazole	C8 H5 F2 N3	181.045	3.546	Full match	No results	No results	916020	1.2376e+06	1.19503e+06	1.20306e+06	994808	1.48019e+06	5.02554e+06	6.23364e+06	4.99364e+06	3.78614e+06	6.8418e+06	4.0438e+06	0.227221	-2.13783	4.44901e-07	1	2.19689
Com_2013_neg	Olprinone	C14 H10 N4 O	250.086	9.566	Full match	No results	No results	261844	120015	162609	112192	152291	122276	174886	207028	116063	91342.4	156969	111493	1.08562	0.118524	0.677537	0.583333	0.177214
Com_2016_neg	2-(1-Cyclopenten-1-yl)ethyl benzenesulfonate	C13 H16 O3 S	252.083	8.846	Full match	No results	No results	542807	1.04318e+06	786950	596809	733351	358255	447792	790212	399463	593330	945178	640460	1.06417	0.0897338	0.796045	0.527778	0.28696
Com_2019_neg	JQ1	C23 H25 Cl N4 O2 S	456.14	11.411	Full match	No results	No results	489114	520909	504729	471858	482702	462685	317649	289535	234020	216653	402765	348190	1.62095	0.696841	0.00298621	1	0.757655
Com_2022_neg	Elvitegravir	C23 H23 Cl F N O5	447.123	8.727	Full match	No results	No results	619412	2.52022e+06	1.43042e+06	1.24571e+06	718153	4.10142e+06	2.30105e+06	3.74293e+06	1.32644e+06	856975	592019	994048	1.08375	0.116031	0.88777	0.555556	0.429079
Com_2023_neg	NL3600000	C10 H11 N3 O	189.091	8.731	Full match	No results	No results	975731	1.04623e+06	1.14473e+06	2.3277e+06	938881	2.29062e+06	683010	877212	526627	509171	2.09772e+06	1.67241e+06	1.37035	0.454549	0.225319	0.777778	0.653085
Com_2031_neg	Aloin B	C21 H22 O9	418.125	9.596	Full match	No results	No results	797143	1.06907e+06	862858	794560	786080	819760	871682	1.11497e+06	801830	693799	971746	746816	0.986276	-0.0199364	0.938031	0.527778	0.046314
Com_2046_neg	(+)-catechin 7-O-beta-D-xyloside	C20 H22 O10	422.119	9.337	Full match	No results	No results	915790	990515	988460	987571	996157	1.31641e+06	1.59441e+06	4.70819e+06	1.00578e+06	723136	876164	1.24711e+06	0.610047	-0.713007	0.370557	0.611111	0.405369
Com_2047_neg	Sesartemin	C23 H26 O8	430.161	11.855	Full match	No results	No results	927597	1.01155e+06	907458	841757	912629	839385	576036	521765	466284	384437	766235	645183	1.61919	0.69527	0.00301136	1	0.756324
Com_2053_neg	2,6-Dimethyl-1-hepten-4-yl 4-methylbenzenesulfonate	C16 H24 O3 S	296.146	6.77	Full match	No results	No results	444183	1.22378e+06	1.5351e+06	692721	979697	966810	1.48959e+06	6.04558e+06	1.12306e+06	734734	6.4896e+06	1.22445e+06	0.341514	-1.54998	0.10312	0.777778	1.27722
Com_2055_neg	amphidinolide B6	C32 H52 O7	548.369	14.073	Full match	No results	No results	849604	1.23401e+06	1.05078e+06	842382	1.16362e+06	1.85564e+06	1.18557e+06	662509	1.63872e+06	336642	1.2432e+06	584332	1.23802	0.308037	0.287338	0.611111	0.474383
Com_2060_neg	Paraldehyde	C6 H12 O3	132.078	8.397	Full match	No results	No results	1.59951e+06	2.05518e+06	1.55202e+06	902481	1.51616e+06	1.17196e+06	1.45408e+06	1.64401e+06	1.0741e+06	744446	1.61517e+06	998655	1.16823	0.224325	0.370928	0.611111	0.273705
Com_2062_neg	Diisodecyl phthalate	C28 H46 O4	446.338	15.112	Full match	No results	No results	6.76189e+06	4.30495e+06	3.39158e+06	6.62386e+06	6.94141e+06	2.48578e+06	861679	833147	325104	281098	421278	406707	9.75051	3.28548	5.35708e-06	1	3.41904
Com_206_neg	2-(Benzoylamino)benzoate	C14 H10 N O3	240.066	12.232	Full match	No results	No results	2.21961e+08	1.98205e+08	2.50624e+08	1.80196e+08	2.89979e+08	8.44531e+08	1.11326e+08	8.53497e+07	7.03718e+07	7.16688e+07	1.25622e+08	7.21153e+07	3.70115	1.88797	0.00248945	1	1.75274
Com_2077_neg	Dibenzothiophene sulfone	C12 H8 O2 S	216.024	1.102	Full match	No results	No results	1.13791e+06	1.75412e+06	2.14656e+06	1.81383e+06	1.52618e+06	1.89095e+06	3.61184e+06	2.70282e+06	1.44333e+06	1.57496e+06	2.59348e+06	3.27306e+06	0.675652	-0.565648	0.0828632	0.75	0.583586
Com_2079_neg	10-desacetyltaxuyunnanin C	C26 H38 O7	462.261	10.666	Full match	No results	No results	2.19253e+06	3.49153e+06	2.28197e+06	2.64073e+06	1.90232e+06	2.46269e+06	4.92145e+06	3.80753e+06	3.72373e+06	2.15387e+06	5.25745e+06	3.31285e+06	0.645979	-0.630441	0.0264485	0.833333	0.640716
Com_2084_neg	Cefalochromin	C28 H22 O10	518.121	10.099	Full match	No results	No results	913130	1.0275e+06	986408	908566	879824	930529	687153	717485	584795	518506	880105	768885	1.35821	0.441701	0.00784915	0.972222	0.482793
Com_2091_neg	Marinobufagenin	C24 H32 O5	400.224	13.239	Full match	No results	No results	482023	526818	535513	467731	501833	713095	802645	2.14465e+06	900076	292984	1.20091e+06	365469	0.565475	-0.822466	0.2918	0.666667	0.54282
Com_2096_neg	pladienolide B	C30 H48 O8	536.333	9.811	Full match	No results	No results	395390	421428	632265	405391	380349	451756	270842	266728	318097	266247	803686	313582	1.1998	0.262798	0.216754	0.833333	0.430567
Com_209_neg	D-(-)-Lyxose	C5 H10 O5	150.052	1.411	Not the top hit	Full match	Full match	2.07251e+08	2.23123e+08	2.26168e+08	3.25046e+08	2.11075e+08	2.21589e+08	1.20768e+08	1.33366e+08	9.30486e+07	8.07132e+07	7.02433e+07	1.13904e+08	2.31071	1.20833	7.85409e-05	1	1.26997
Com_2103_neg	cryptophycin 1	C35 H43 Cl N2 O8	654.273	11.228	Full match	No results	No results	1.98346e+06	2.65244e+06	2.14808e+06	1.29986e+06	3.29363e+06	1.72764e+06	3.29059e+06	2.67864e+06	3.04078e+06	1.36144e+06	3.93341e+06	2.09284e+06	0.799203	-0.323365	0.320824	0.694444	0.366325
Com_2106_neg	tubiferal A	C30 H42 O5	482.301	13.17	Full match	No results	No results	301059	327813	311810	294924	308360	321921	198251	178466	156863	133792	362508	228327	1.48297	0.568492	0.0250194	0.833333	0.687592
Com_2116_neg	11-Deoxocucurbitacin I	C30 H44 O6	500.311	13.234	Full match	No results	No results	565444	594267	749502	536736	566083	580380	360073	324319	1.30466e+06	312173	1.40281e+06	486503	0.857268	-0.222182	0.862618	0.666667	0.123396
Com_2119_neg	soyasapogenol A	C30 H50 O4	474.369	14.953	Full match	No results	No results	314034	1.01491e+06	726436	2.42699e+06	986547	1.36555e+06	483677	689361	2.39582e+06	694707	6.74966e+06	898836	0.573743	-0.801523	0.62618	0.555556	0.424363
Com_2122_neg	2-(3-((Tributylstannyl)methoxy)propyl)isoindoline-1,3-dione	C24 H39 N O3 Sn	509.196	9.641	Full match	No results	No results	2.62874e+06	3.32766e+06	3.41265e+06	2.22494e+06	2.53957e+06	2.98262e+06	2.49799e+06	2.96849e+06	1.83287e+06	2.01107e+06	2.80482e+06	3.18674e+06	1.11856	0.161642	0.314364	0.694444	0.218034
Com_2132_neg	Glutaurine	C7 H14 N2 O6 S	254.056	12.19	Full match	No results	No results	1.21916e+06	1.44804e+06	2.03552e+06	3.05692e+06	1.20354e+06	1.39343e+06	1.28408e+06	1.27111e+06	4.33918e+06	660956	1.46798e+06	1.38336e+06	0.995191	-0.00695532	0.712921	0.555556	0.203933
Com_2134_neg	Nemonapride (JAN)	C21 H26 Cl N3 O2	387.171	9.668	Full match	No results	No results	857649	1.45323e+06	939858	845372	818670	889049	2.92508e+06	1.24669e+06	708288	575082	1.29447e+06	1.13008e+06	0.736555	-0.441134	0.483813	0.583333	0.359352
Com_2135_neg	17beta-Hydroxy-7alpha-mercaptoandrost-4-en-3-one 7-propionate	C22 H32 O3 S	376.209	11.355	Full match	No results	No results	2.84792e+06	3.23406e+06	2.25889e+06	890726	2.7303e+06	1.59764e+06	2.5631e+06	3.80592e+06	1.76221e+06	1.29727e+06	6.34489e+06	1.46545e+06	0.78657	-0.346353	0.633181	0.472222	0.433612
Com_2142_neg	Methylsuccinic acid	C5 H8 O4	132.044	7.521	No results	Invalid mass	No results	717070	2.43552e+06	1.96372e+06	1.78081e+06	780621	4.04976e+06	1.37089e+06	2.9243e+06	1.09045e+06	529866	604413	1.72024e+06	1.42321	0.50915	0.38263	0.694444	0.563011
Com_214_neg	(÷)-Abscisic acid	C15 H20 O4	264.135	8	Full match	Full match	Full match	1.71332e+07	9.36172e+06	6.14158e+06	6.76588e+06	5.12629e+06	6.82999e+06	4.91938e+06	4.10103e+06	2.29231e+06	2.02716e+06	3.04206e+06	3.12569e+06	2.63275	1.39657	0.00217715	1	1.37609
Com_2153_neg	3-hexaprenyl-4,5-dihydroxybenzoic acid	C37 H54 O4	562.403	1.148	Full match	No results	No results	6.13966e+06	5.53604e+06	6.66874e+06	8.11086e+06	6.15928e+06	1.84487e+06	1.06257e+06	1.0373e+06	651119	802949	1.56313e+06	1.22932e+06	5.42978	2.44089	0.000168102	1	2.43976
Com_2158_neg	(3R)-3-(3,4-dimethoxyphenyl)-8-hydroxy-3,4-dihydroisochromen-1-one	C17 H16 O5	300.096	7.852	No match	No results	Invalid mass	6.07453e+06	2.46625e+06	3.65366e+06	2.00129e+06	3.52251e+06	3.1691e+06	2.63487e+06	2.94819e+06	3.00129e+06	2.24457e+06	4.51882e+06	1.36675e+06	1.24965	0.321529	0.344693	0.666667	0.329606
Com_2192_neg	adenosine 5▽-phosphoramidate	C10 H15 N6 O6 P	346.081	9.844	Full match	No results	No results	591465	659796	623933	587620	551321	570930	394765	414586	360422	288310	509589	419065	1.50208	0.58696	0.00195421	1	0.625677
Com_2194_neg	5-Pentylresorcinol	C11 H16 O2	180.114	7.055	Full match	No results	No results	1.12381e+06	2.08208e+06	1.4242e+06	932083	779475	1.1166e+06	2.2056e+06	1.49171e+06	1.04456e+06	1.10669e+06	1.56547e+06	1.59594e+06	0.827778	-0.272684	0.27077	0.694444	0.347424
Com_2198_neg	Ro15-4513	C15 H14 N6 O3	326.114	10.138	Full match	No results	No results	1.58004e+06	1.52741e+06	1.42518e+06	2.78812e+06	783689	1.93678e+06	1.7326e+06	1.87988e+06	4.08458e+06	1.38084e+06	2.52029e+06	2.20065e+06	0.727686	-0.458612	0.186362	0.694444	0.482332
Com_2209_neg	3,N(4)-ethenocytosine	C6 H5 N3 O	135.044	7.531	Full match	No results	No results	1.14084e+06	2.19634e+06	1.51481e+06	1.3675e+06	891387	1.43483e+06	2.93056e+06	1.30899e+06	721017	1.22663e+06	1.07708e+06	1.24913e+06	1.0038	0.00546538	0.786747	0.638889	0.0982325
Com_2229_neg	2-(4-Chlorophenyl)-N-[3-(1-piperidinyl)propyl]-4-quinolinamine	C23 H26 Cl N3	379.183	7.494	Full match	No results	No results	2.12478e+06	5.77377e+06	4.39192e+06	1.45705e+06	1.8809e+06	1.94759e+06	1.08664e+06	894196	758618	524959	1.69434e+06	1.0656e+06	2.91749	1.54473	0.00507928	0.972222	1.49493
Com_2262_neg	1-deoxy-D-altro-heptulose 7-phosphate	C7 H15 O9 P	274.046	7.113	Full match	No results	No results	1.23967e+06	1.3013e+06	1.23208e+06	1.19291e+06	1.19707e+06	1.21462e+06	2.00823e+06	3.34231e+06	2.66199e+06	1.65275e+06	2.44039e+06	2.07057e+06	0.520423	-0.942244	0.00142056	1	0.937782
Com_2268_neg	DE1625000	C7 H6 N2 O	134.048	7.478	Full match	No results	No results	1.76645e+06	1.49254e+06	1.19329e+06	1.22211e+06	1.32867e+06	1.15614e+06	696391	700972	592675	636432	1.00803e+06	1.18463e+06	1.69309	0.759657	0.00295176	0.972222	0.826548
Com_228_neg	Asiatic acid 생汽꿇擧	C30 H48 O5	488.349	13.038	Full match	No results	Full match	7.68778e+07	6.76971e+07	3.97798e+07	5.57802e+07	3.90874e+07	6.53439e+07	4.43868e+07	2.82315e+07	6.01438e+07	2.14257e+07	1.21278e+08	2.8954e+07	1.13188	0.178719	0.364911	0.694444	0.423334
Com_2290_neg	bielschowskysin	C22 H26 O9	434.157	8.618	Full match	No results	No results	579873	611144	571629	555380	357879	485330	1.29939e+06	513936	511976	320973	583893	379471	0.875777	-0.191365	0.869881	0.555556	0.0746293
Com_2300_neg	Decuroside III	C26 H34 O14	570.193	10.475	Full match	No results	No results	1.18968e+06	1.56522e+06	729441	674614	1.7201e+06	1.05981e+06	801103	1.29414e+06	692353	878104	1.1778e+06	1.27468e+06	1.13414	0.181598	0.631601	0.555556	0.204037
Com_2304_neg	excavatoid A	C21 H34 O9	430.219	8.18	Full match	No results	No results	2.19533e+06	4.40031e+06	3.37689e+06	2.6627e+06	2.86908e+06	2.82365e+06	2.51108e+06	1.99838e+06	857296	1.27201e+06	2.15923e+06	1.18305e+06	1.83628	0.876784	0.0104363	0.972222	0.970798
Com_2315_neg	Correolide	C40 H52 O16	788.328	11.051	Full match	No results	No results	459648	499507	473557	503138	463451	467811	351386	343341	284761	233668	459270	363855	1.40801	0.493662	0.0112461	1	0.549356
Com_231_neg	Phloroglucinol	C6 H6 O3	126.031	1.374	Partial match	Full match	Full match	1.00533e+08	3.3979e+08	4.3207e+08	4.82186e+08	6.53229e+08	1.02761e+08	8.32957e+07	8.99751e+07	5.00732e+07	3.84583e+07	3.73583e+07	6.24362e+07	5.8368	2.54518	0.00323784	1	2.36493
Com_2322_neg	Cucurbitacin F	C30 H46 O7	518.322	10.379	Full match	No results	No results	1.97689e+06	1.97308e+06	1.68413e+06	1.33245e+06	1.91119e+06	530295	1.15546e+06	1.53194e+06	1.22439e+06	730405	870216	1.59531e+06	1.32364	0.404506	0.367552	0.777778	0.388417
Com_2332_neg	Omadacycline	C29 H40 N4 O7	556.287	9.968	Full match	No results	No results	901688	1.31945e+06	1.12469e+06	584480	1.17143e+06	685795	1.21574e+06	1.39877e+06	1.19746e+06	1.04948e+06	1.16646e+06	977209	0.826188	-0.275457	0.157507	0.722222	0.342067
Com_233_neg	Gentiopicrin	C16 H20 O9	356.11	7.684	Full match	No results	No results	6.00046e+07	1.50007e+07	3.9798e+07	1.8779e+07	1.66154e+07	5.3488e+07	3.208e+07	4.35821e+07	2.74298e+07	3.45531e+07	4.62014e+07	4.21445e+07	0.901301	-0.14992	0.39687	0.583333	0.38103
Com_2342_neg	MFCD00210294	C16 H22 O10	374.12	7.72	Full match	No results	No results	3.0965e+06	2.87193e+06	4.797e+06	6.06965e+06	2.85489e+06	2.39354e+06	718143	672219	523010	938560	2.81811e+06	984129	3.31875	1.73064	0.00146308	0.972222	1.9664
Com_234_neg	3-(5'-methylthio)pentylmalic acid	C10 H18 O5 S	250.087	8.855	Full match	No results	No results	3.59202e+06	2.1007e+06	2.02408e+06	3.15038e+06	2.7753e+06	1.50871e+06	2.41688e+06	2.51162e+06	1.77248e+06	1.7543e+06	4.08765e+06	1.97678e+06	1.04349	0.0614189	0.806864	0.583333	0.288531
Com_2366_neg	Loxoprofen	C15 H18 O3	246.124	8.231	Full match	No results	No results	686510	796438	676548	644555	651154	648080	440871	421217	345072	296087	540735	450586	1.64489	0.717989	0.00120517	1	0.76527
Com_2372_neg	2H-1,4-Benzoxazin-3(4H)-one	C8 H7 N O2	149.047	3.118	Full match	No results	No results	2.37095e+06	2.3295e+06	2.80374e+06	2.44645e+06	2.46888e+06	1.84838e+06	1.11933e+06	1.09988e+06	888689	967940	1.43929e+06	1.50954e+06	2.03111	1.02227	8.05269e-05	1	1.07252
Com_2377_neg	3,4-Bis({[(2-methyl-2-propanyl)oxy]carbonyl}amino)benzoic acid	C17 H24 N2 O6	352.162	7.124	Full match	No results	No results	3.65121e+06	2.15884e+06	841603	1.96484e+06	1.42477e+06	3.18183e+06	4.88591e+06	3.76343e+06	1.51503e+06	1.04893e+06	4.15491e+06	2.53158e+06	0.738729	-0.436883	0.428178	0.694444	0.491963
Com_2385_neg	Dihydropteroic acid	C14 H14 N6 O3	314.114	10.096	Full match	No results	No results	928897	1.08061e+06	1.21502e+06	1.54579e+06	785081	1.71633e+06	406231	1.18998e+06	1.56631e+06	947171	1.94914e+06	1.5326e+06	0.957887	-0.062073	0.915719	0.555556	0.0630038
Com_2393_neg	Pleuromutilin	C22 H34 O5	378.239	12.209	Full match	No results	No results	624165	631554	646113	563003	589995	695855	366497	343195	297387	259172	508601	421080	1.70801	0.772321	0.00170906	1	0.830504
Com_2395_neg	Dihomo-gamma-linolenic acid	C20 H34 O2	306.254	14.612	Full match	No results	No results	3.56947e+06	4.59826e+06	6.20259e+06	6.56738e+06	6.00366e+06	3.54568e+06	1.69018e+06	1.26175e+06	597956	928760	2.21642e+06	1.65243e+06	3.65224	1.86878	0.000308124	1	2.01149
Com_2396_neg	1-Fluoro-4-{2-[4-(methylsulfonyl)phenyl]-1-cyclopenten-1-yl}benzene	C18 H17 F O2 S	316.093	8.176	Full match	No results	No results	920257	866782	897724	1.14414e+06	845141	815797	2.936e+06	1.41658e+06	1.1574e+06	1.61035e+06	843317	1.66359e+06	0.570241	-0.810357	0.0328508	0.861111	0.731363
Com_2406_neg	2-Butyryl-3,5-dihydroxy-4,6-dimethylphenyl alpha-D-glucopyranoside	C18 H26 O9	386.156	10.951	Full match	No results	No results	1.51328e+06	1.53857e+06	1.35034e+06	1.50603e+06	1.00382e+06	1.23443e+06	2.16067e+06	1.73932e+06	1.50937e+06	1.5131e+06	1.1616e+06	2.41054e+06	0.776255	-0.365398	0.101644	0.75	0.352257
Com_240_neg	Dehydrovomifoliol	C13 H18 O3	222.125	9.029	Full match	No results	No results	2.34766e+07	3.04716e+07	5.75628e+07	1.02019e+08	1.85581e+07	4.91876e+07	1.54149e+07	1.21317e+07	7.77387e+06	7.61171e+06	6.63919e+07	2.92981e+07	2.02908	1.02083	0.0741332	0.805556	1.36456
Com_2410_neg	8-METHOXYKYNURENIC ACID	C11 H9 N O4	219.053	9.734	Full match	No results	No results	653800	1.78504e+06	1.78929e+06	1.63981e+06	1.84105e+06	1.42891e+06	2.26944e+06	1.57365e+06	1.41492e+06	1.29501e+06	5.80394e+06	1.88592e+06	0.641576	-0.640308	0.244353	0.611111	0.648226
Com_2415_neg	ribisin A	C13 H12 O5	248.067	11.127	Full match	No results	No results	536146	1.11518e+06	716381	621186	505749	1.31883e+06	374125	1.24651e+06	351755	314310	471222	481055	1.48611	0.57154	0.113584	0.861111	0.677684
Com_2419_neg	briaexcavatin Q	C26 H37 Cl O11	560.201	8.65	Full match	No results	No results	1.77419e+06	2.45142e+06	3.38459e+06	2.4621e+06	2.35621e+06	2.72889e+06	1.85859e+06	2.11376e+06	1.68915e+06	1.657e+06	3.01273e+06	2.60325e+06	1.17186	0.2288	0.235596	0.694444	0.286911
Com_242_neg	5,5-Dimethyl-4-(3-oxobutyl)dihydro-2(3H)-furanone	C10 H16 O3	184.109	7.951	Full match	No results	No results	5.55084e+07	1.47102e+08	6.26365e+07	2.60167e+07	4.63251e+07	5.01744e+07	1.12456e+08	9.20885e+07	4.22799e+07	3.79528e+07	5.86032e+07	7.49249e+07	0.926986	-0.109381	0.632184	0.583333	0.272329
Com_2435_neg	Tolciclate	C20 H21 N O S	323.136	8.911	Full match	No results	No results	829230	1.33469e+06	902229	900504	814110	963125	614735	1.34351e+06	808686	770004	1.04342e+06	741347	1.07933	0.110139	0.499997	0.694444	0.14176
Com_2436_neg	Trioxsalen	C14 H12 O3	228.079	10.188	Full match	No results	No results	238429	300339	248171	254625	236249	6.03615e+06	198429	404899	148641	122703	235565	189250	5.62835	2.49271	0.217053	0.861111	1.22078
Com_2438_neg	Fenipentol	C11 H16 O	164.119	12.886	Full match	No results	No results	3.4659e+06	6.22419e+06	5.44182e+06	6.2682e+06	2.63851e+06	4.96333e+06	2.6943e+06	1.7349e+06	2.44926e+06	3.02993e+06	4.80912e+06	3.85672e+06	1.56141	0.642846	0.0512854	0.833333	0.673417
Com_244_neg	2-methylcitric acid	C7 H10 O7	206.042	1.169	Full match	No results	No results	1.93042e+08	3.4565e+08	3.5825e+08	5.44369e+08	3.54969e+08	1.40133e+08	5.17046e+07	6.54538e+07	3.45064e+07	3.05033e+07	7.67474e+07	4.8003e+07	6.30921	2.65746	4.3946e-05	1	2.67154
Com_2452_neg	2,4,6-Tris[(4-methoxybenzyl)oxy]-1,3,5-cyclohexanetriol	C30 H36 O9	540.235	9.671	Full match	No results	No results	1.724e+06	3.01251e+06	2.90113e+06	3.66198e+06	1.92665e+06	3.94396e+06	3.36442e+06	3.94902e+06	2.75821e+06	2.26549e+06	4.41491e+06	2.49412e+06	0.892138	-0.164661	0.475497	0.611111	0.197784
Com_245_neg	dihydroconiferyl alcohol glucoside	C16 H24 O8	344.146	10.379	Full match	No results	No results	4.28543e+07	4.43412e+07	6.86381e+07	2.61839e+08	4.21421e+07	1.23376e+08	1.83463e+08	2.25299e+08	1.45199e+08	1.09052e+08	2.50776e+08	2.16542e+08	0.515947	-0.954705	0.0321939	0.805556	1.33258
Com_2480_neg	Leukotriene B4	C20 H32 O4	336.229	12.889	Full match	No results	No results	2.40421e+06	5.88562e+06	5.21405e+06	5.10116e+06	2.31839e+06	4.52484e+06	2.26088e+06	1.85195e+06	1.99246e+06	2.9354e+06	3.64761e+06	3.49149e+06	1.57284	0.653375	0.0701461	0.833333	0.628667
Com_2482_neg	manzamine A	C36 H44 N4 O	548.354	11.477	Full match	No results	No results	951678	1.28653e+06	900911	981604	862803	945074	492185	1.12107e+06	1.10905e+06	1.07041e+06	1.5787e+06	1.46387e+06	0.867354	-0.205307	0.632143	0.75	0.190599
Com_2498_neg	Benzyl 4-O-beta-D-glucopyranosyl-beta-D-glucopyranoside	C19 H28 O11	432.161	8.682	Full match	No results	No results	1.52815e+06	3.13919e+06	4.58787e+06	1.68066e+06	947137	2.75707e+06	985757	1.34584e+06	541688	362280	821249	778462	3.02777	1.59825	0.00571138	0.944444	1.57325
Com_24_neg	Catechin	C15 H14 O6	290.078	7.747	Full match	Full match	Not the top hit	3.91361e+08	1.1066e+09	1.13267e+09	3.14898e+09	5.87797e+08	3.02083e+09	4.0412e+09	6.26371e+09	4.36391e+09	3.64517e+09	5.3015e+09	7.64027e+09	0.300368	-1.7352	0.00695586	1	2.15428
Com_2503_neg	3-Aminotyrosine	C9 H12 N2 O3	196.084	2.869	Full match	No results	No results	2.66432e+06	2.77384e+06	3.02266e+06	2.65983e+06	2.41801e+06	2.89754e+06	1.12927e+06	912907	964283	1.17012e+06	1.54914e+06	1.87053e+06	2.16372	1.11352	0.000577741	1	1.19098
Com_2504_neg	Ophiopogonin B	C39 H62 O12	722.423	13.986	Full match	No results	No results	901619	940967	1.5412e+06	1.64038e+06	1.57412e+06	1.58846e+06	2.85628e+06	2.14612e+06	1.51358e+06	1.15844e+06	1.57031e+06	1.82434e+06	0.739606	-0.435171	0.120498	0.694444	0.440506
Com_251_neg	Quizalofop-P-tefuryl	C22 H21 Cl N2 O5	428.112	8.512	Full match	No results	No results	1.22347e+07	9.93131e+06	1.30106e+07	1.21174e+07	9.51948e+06	1.65264e+07	2.05448e+07	1.66538e+07	1.27022e+07	1.38137e+07	2.71232e+07	2.72272e+07	0.621184	-0.686908	0.0208704	0.916667	0.722422
Com_2525_neg	Astringin	C20 H22 O9	406.125	11.273	Full match	No results	No results	526966	565776	537983	1.51921e+06	522244	505211	367574	331171	266003	250783	1.00807e+06	408448	1.58713	0.666419	0.0997413	0.861111	0.791027
Com_2528_neg	Sebacic acid	C10 H18 O4	202.12	12.372	Full match	No results	No results	945721	848232	911025	702326	801243	775516	846291	599838	611172	505948	702734	923265	1.18973	0.250631	0.105268	0.75	0.300574
Com_252_neg	3-Hydroxyvaline	C5 H11 N O3	133.073	1.361	Full match	No results	No results	2.45627e+07	4.61172e+07	5.00738e+07	7.77445e+07	5.38094e+07	2.54193e+07	6.48463e+06	1.83395e+08	4.18612e+06	5.35524e+06	7.67417e+06	6.13922e+06	1.30245	0.381226	0.0593864	0.833333	2.0954
Com_2530_neg	Agnuside	C22 H26 O11	466.146	8.432	Full match	No results	No results	341343	353012	364847	1.13594e+06	607311	1.13225e+06	1.26893e+06	1.88883e+06	920093	495730	596173	595533	0.682482	-0.551137	0.229595	0.694444	0.618577
Com_2531_neg	gaboxadol	C6 H8 N2 O2	140.058	4.239	Full match	No results	No results	3.66044e+06	3.00118e+06	4.08649e+06	3.4601e+06	3.50534e+06	3.60887e+06	1.23229e+06	1.12148e+06	1.24184e+06	986587	2.2438e+06	1.93676e+06	2.4333	1.28292	0.000562897	1	1.38392
Com_2533_neg	Makisterone A	C28 H46 O7	494.322	15.073	Full match	No results	No results	380759	416879	440495	418654	404409	387350	214121	204359	180451	158232	283432	259229	1.88375	0.913607	0.000523901	1	0.969446
Com_2536_neg	aspeverin	C22 H24 N4 O2	376.192	9.632	Full match	No results	No results	1.58495e+06	1.46156e+06	1.58336e+06	464337	1.4731e+06	683694	530462	384857	332554	259423	560333	228697	3.15765	1.65885	0.00234623	0.944444	1.63959
Com_2537_neg	Ethanal tetramer	C8 H16 O4	176.104	8.269	Full match	No results	No results	845376	1.23061e+06	1.692e+06	1.00401e+06	1.21434e+06	758443	843712	1.01546e+06	996327	612477	1.43282e+06	726807	1.19852	0.261252	0.306749	0.694444	0.304585
Com_254_neg	L-Proline	C5 H9 N O2	115.063	1.435	Full match	No results	No results	3.9111e+08	1.48799e+08	1.0704e+08	1.62831e+08	2.28669e+08	1.29591e+08	1.10346e+08	1.82177e+08	7.16804e+07	6.53453e+07	1.08387e+08	1.05985e+08	1.81395	0.859135	0.0461308	0.833333	0.832568
Com_2560_neg	2,9-Dihydroxy-1-methoxydibenzo[cd,f]indol-4(5H)-one	C16 H11 N O4	281.068	11.81	Full match	No results	No results	835385	1.18933e+06	1.49727e+06	697312	1.21826e+06	576337	527487	3.61207e+06	447383	380486	831563	427563	0.965848	-0.050132	0.444473	0.777778	0.488941
Com_2569_neg	picrasin B	C21 H28 O6	376.188	13.276	Full match	No results	No results	351813	382434	386412	348384	355328	344720	237914	215858	184942	2.71524e+06	307179	272702	0.551393	-0.858848	0.991809	0.833333	0.205651
Com_2572_neg	Diethyl diallylmalonate	C13 H20 O4	240.135	11.569	Full match	No results	No results	3.24813e+06	2.89014e+06	4.0232e+06	3.05338e+06	2.89025e+06	3.54729e+06	1.98986e+06	2.61202e+06	1.69702e+06	1.23869e+06	1.64789e+06	2.58684e+06	1.66937	0.739306	0.00420027	1	0.79937
Com_2579_neg	Rhodojaponin IV	C24 H38 O8	454.256	10.987	Full match	No results	No results	977549	1.30138e+06	1.55649e+06	2.07772e+06	1.24157e+06	2.30355e+06	3.63048e+06	1.19613e+06	1.21801e+06	2.68487e+06	1.34077e+06	1.18008e+06	0.840708	-0.250323	0.665232	0.5	0.235399
Com_2582_neg	Iristectorigenin B 臍棺뼝計菉羹	C17 H14 O7	330.068	8.003	No results	No results	Invalid mass	198142	202830	197860	184991	191553	188986	122851	126988	100439	85398	162560	132189	1.59409	0.672731	0.00292226	1	0.727339
Com_2598_neg	kinamycin D	C22 H18 N2 O9	454.101	9.209	Full match	No results	No results	1.04272e+06	1.60346e+06	1.46534e+06	1.75846e+06	2.78934e+06	2.23373e+06	2.36633e+06	2.20705e+06	1.74863e+06	2.56899e+06	3.63797e+06	2.52072e+06	0.723806	-0.466325	0.0721182	0.777778	0.538776
Com_262_neg	Cefepime	C19 H24 N6 O5 S2	480.125	6.603	Full match	No results	No results	710355	694400	724770	665000	643367	667783	524742	471489	389387	342968	674921	535935	1.39675	0.482078	0.0145549	0.916667	0.546165
Com_2634_neg	Salicylate	C7 H5 O3	137.024	4.418	Full match	No results	No results	4.12017e+06	3.97836e+06	4.61011e+06	3.51164e+06	4.83851e+06	2.0569e+06	668520	353818	709416	308058	972294	657638	6.29899	2.65512	1.39492e-05	1	2.79007
Com_2657_neg	(.+/-.)-Tartaric acid	C4 H6 O6	150.016	14.812	Full match	No results	No results	574383	564507	709666	627383	794691	763517	583944	178979	275811	209410	295266	293900	2.19568	1.13467	0.00258121	0.944444	1.26851
Com_2674_neg	Droxidopa	C9 H11 N O5	213.063	7.575	Full match	No results	No results	134113	1.2337e+06	634378	777253	142575	1.78341e+06	665567	1.63546e+06	598258	376741	112799	943273	1.08618	0.119261	0.948833	0.555556	0.542702
Com_2680_neg	2-amino-2,3,7-trideoxy-D-lyxo-hept-6-ulosonic acid	C7 H13 N O5	191.08	8.246	Full match	No results	No results	128937	138878	134127	121686	120680	121408	82725	125840	68411	58517.3	104482	87974.2	1.45036	0.536408	0.0154421	0.916667	0.603027
Com_2683_neg	GANODERONE A	C30 H46 O3	454.343	14.126	Full match	No results	No results	2.43852e+06	4.57249e+06	947079	1.64662e+06	1.91777e+06	3.35574e+06	2.0275e+06	1.89141e+06	1.93497e+06	1.32355e+06	1.94493e+06	1.43242e+06	1.40962	0.495308	0.362219	0.638889	0.37836
Com_2689_neg	Limaprost	C22 H36 O5	380.255	13.284	Full match	No results	No results	561388	590116	595139	536569	547263	530926	366427	353367	288303	263019	479780	420007	1.54839	0.630768	0.00363854	1	0.687441
Com_2717_neg	Deoxycholic acid	C24 H40 O4	392.291	12.223	Full match	No results	No results	634418	641928	656726	572251	599686	707285	372517	348833	302272	263429	516955	427997	1.70801	0.772321	0.00170906	1	0.830504
Com_2721_neg	DL-Ornithine	C5 H12 N2 O2	132.09	4.619	Full match	No results	No results	2.70127e+06	2.92004e+06	2.6732e+06	418576	611633	2.6623e+06	1.58152e+06	2.31332e+06	1.34425e+06	1.30102e+06	2.80272e+06	2.20417e+06	1.03811	0.0539569	0.673837	0.583333	0.303726
Com_2723_neg	cinnamtannin A2	C60 H50 O24	1154.27	6.039	Full match	No results	No results	220832	209517	217639	193905	192915	205221	561764	1.15755e+06	1.13448e+06	846273	1.38548e+06	502057	0.221925	-2.17186	0.000326025	1	2.14333
Com_2740_neg	Methylsulfonylmethane	C2 H6 O2 S	94.0084	15.014	Full match	No results	No results	1.03252e+06	1.21395e+06	790555	1.1698e+06	1.07838e+06	823044	491692	489358	292019	367574	479094	333513	2.48985	1.31606	1.94829e-05	1	1.36451
Com_2747_neg	5,6-Dioxo-1,3-cyclohexadiene-1-carboxylic acid	C7 H4 O4	152.01	7.773	Full match	No results	No results	1.10743e+06	901615	1.32601e+06	1.2674e+06	1.07352e+06	883649	600486	722516	914047	479104	853545	755273	1.51668	0.600921	0.00586466	0.944444	0.634659
Com_2775_neg	pelitinib	C24 H23 Cl F N5 O2	467.154	8.39	Full match	No results	No results	336265	333874	321540	314647	295754	551882	229241	213061	188554	150850	346001	275727	1.53478	0.618033	0.0161113	0.861111	0.655468
Com_2779_neg	Metildigoxin	C42 H66 O14	794.445	14.027	Full match	No results	No results	1.43914e+06	1.56607e+06	1.21935e+06	812555	744505	2.54222e+06	1.24674e+06	1.96919e+06	1.98832e+06	966222	1.6757e+06	1.73329e+06	0.868925	-0.202696	0.395211	0.694444	0.295134
Com_2785_neg	(+)-Ingenol	C20 H28 O5	348.192	10.578	Full match	No results	No results	837653	1.25639e+06	1.41664e+06	1.04585e+06	697814	1.41949e+06	1.4295e+06	1.39981e+06	798390	417464	947601	1.05798e+06	1.10298	0.141405	0.543778	0.555556	0.221262
Com_2807_neg	acetylglutamate	C7 H9 N O5	187.049	8.107	Invalid mass	No results	No results	189846	319387	212735	419362	184493	932114	368769	520831	362107	138913	164079	200457	1.28646	0.363406	0.603772	0.416667	0.468656
Com_2816_neg	3-deoxy-D-manno-2-octulosonic acid	C8 H14 O8	238.068	13.191	Full match	No results	No results	1.08227e+06	719243	721548	764154	1.15147e+06	3.81572e+06	384643	453980	251109	243344	1.09262e+06	450633	2.86977	1.52093	0.0174436	0.888889	1.45475
Com_2817_neg	3,5-Di-t-butylcatechol	C14 H22 O2	222.161	12.156	Full match	No results	No results	471017	505549	404240	605292	389353	556112	386491	378491	553673	266362	604363	484487	1.09638	0.132743	0.439474	0.666667	0.178888
Com_2819_neg	(+)-7-deoxy-trans-dihydronarciclasine	C14 H15 N O6	293.089	10.742	Full match	No results	No results	355332	363811	349722	445936	346577	602434	204238	311676	162238	192785	283989	353575	1.63329	0.707777	0.00931705	0.944444	0.754716
Com_2837_neg	Methyl 4-[2-(3-bromophenyl)-2-cyclobutylethyl]benzoate	C20 H21 Br O2	372.072	14.438	Full match	No results	No results	1.72082e+06	2.95209e+06	1.97121e+06	3.34806e+06	2.95746e+06	3.48496e+06	1.80454e+06	1.67156e+06	1.14455e+06	1.10335e+06	2.15172e+06	1.46201e+06	1.76002	0.815594	0.0058811	0.916667	0.830949
Com_2839_neg	2-((4-Nitrophenoxy)methyl)oxirane	C9 H9 N O4	195.052	1.894	Full match	No results	No results	1.2942e+06	1.50888e+06	2.11084e+06	2.1626e+06	1.52881e+06	2.09212e+06	884196	971820	629591	652470	1.15704e+06	1.03266e+06	2.00786	1.00566	0.000439362	1	1.0427
Com_2857_neg	loliolide	C11 H16 O3	196.109	8.713	Full match	No results	No results	896040	1.45569e+06	1.10731e+06	1.07142e+06	831668	1.54003e+06	957786	996118	501314	480580	1.18115e+06	741007	1.4208	0.506699	0.0691721	0.777778	0.574976
Com_2874_neg	(2R)-1-(beta-D-Galactopyranosyloxy)-3-hydroxy-2-propanyl palmitate	C25 H48 O9	492.328	14.79	Full match	No results	No results	663303	606974	685983	666583	915975	876602	455982	573957	376514	259334	447407	449626	1.72288	0.784819	0.00217513	1	0.830165
Com_2912_neg	phomopsin A	C36 H45 Cl N6 O12	788.282	10.512	Full match	No results	No results	232150	263196	337274	1.35542e+06	220379	1.0221e+06	437454	971678	725080	687050	772692	785270	0.783362	-0.352248	0.193279	0.666667	0.748379
Com_291_neg	2-Acetyl-3,5-dihydroxy-4-methylphenyl D-allopyranoside	C15 H20 O9	344.109	7.972	Full match	No results	No results	3.72121e+06	1.57948e+08	4.87212e+07	3.64973e+07	1.6049e+07	1.1611e+08	6.73564e+07	2.01179e+08	3.07531e+07	1.60789e+07	1.73557e+07	7.90225e+07	0.920584	-0.119378	0.716472	0.555556	0.434108
Com_2922_neg	(4-Aminophenyl)(7-benzyl-3,7-diazabicyclo[3.3.1]non-3-yl)methanone	C21 H25 N3 O	335.201	10.731	Full match	No results	No results	1.12937e+06	1.21471e+06	1.58367e+06	843696	1.10012e+06	677094	1.20112e+06	1.25315e+06	1.10709e+06	816285	1.31914e+06	713166	1.02164	0.0308878	0.947068	0.527778	0.101306
Com_2927_neg	Artemether	C16 H26 O5	298.177	10.369	Full match	No results	No results	577172	744848	556550	480918	588379	448990	571187	741069	1.70467e+06	451373	1.05163e+06	546390	0.670478	-0.576737	0.205142	0.638889	0.449274
Com_292_neg	Acetophenone	C8 H8 O	120.057	2.077	Full match	No results	No results	2.56467e+07	3.8621e+07	3.12208e+07	3.39048e+07	3.67938e+07	1.18681e+08	2.79233e+07	2.61778e+07	2.32874e+08	2.10192e+08	2.68985e+08	3.67005e+07	0.35482	-1.49484	0.201795	0.638889	1.10951
Com_2935_neg	Cyanolide A Aglycon	C26 H44 O8	484.302	12.89	Full match	No results	No results	744167	818528	470649	657534	526190	624469	349849	606008	332625	196456	764465	1.58402e+06	1.00211	0.00304806	0.512895	0.638889	0.540656
Com_2954_neg	Gly-l-pro	C7 H12 N2 O3	172.084	4.839	Full match	No results	No results	1.02747e+06	1.45549e+06	1.47616e+06	1.48106e+06	1.51942e+06	1.37793e+06	625699	598560	260795	417391	726081	638742	2.55183	1.35153	0.000836115	1	1.46069
Com_2967_neg	Baliospermin	C32 H50 O8	562.349	12.92	Full match	No results	No results	415716	453291	468904	403725	637110	415363	275385	255571	875221	194983	1.63434e+06	319908	0.785876	-0.347626	0.85194	0.666667	0.25349
Com_2969_neg	ambruticin	C28 H42 O6	474.296	11.328	Full match	No results	No results	566817	637053	586572	561477	543281	578256	369069	355641	1.0856e+06	247843	1.21554e+06	405253	0.944144	-0.0829216	0.653822	0.666667	0.205588
Com_2989_neg	1-O-acetyl-alpha-maltose	C14 H24 O12	384.125	5.162	Full match	No results	No results	329274	231986	544110	276583	468400	491287	414910	303872	277881	263562	653994	470748	0.981833	-0.0264511	0.953921	0.5	0.256203
Com_2993_neg	Ablukast	C28 H34 O8	498.228	14.776	Full match	No results	No results	2.22029e+06	2.08645e+06	1.87385e+06	1.51341e+06	1.57622e+06	2.3862e+06	772185	1.99943e+06	1.00335e+06	1.03232e+06	807740	918690	1.78405	0.835152	0.00504277	0.916667	0.944476
Com_299_neg	Succinic anhydride	C4 H4 O3	100.016	1.485	Full match	No results	No results	9.59331e+07	1.33678e+08	1.74602e+08	2.12869e+08	1.06652e+08	8.80363e+07	7.29389e+07	6.72474e+07	5.90864e+07	6.14588e+07	1.36189e+08	7.31138e+07	1.72705	0.788307	0.017958	0.888889	0.817376
Com_29_neg	Ethyl myristate	C16 H32 O2	256.239	14.619	Partial match	Full match	No results	4.71694e+09	6.57009e+09	7.78893e+09	8.30389e+09	6.71277e+09	6.11788e+09	3.30521e+09	2.9337e+09	2.33394e+09	2.30005e+09	3.41593e+09	3.17993e+09	2.30185	1.20279	1.88909e-05	1	1.23105
Com_3002_neg	cholic acid	C24 H40 O5	408.286	12.601	Full match	No results	No results	364405	386186	585559	340752	336310	695538	376792	255709	204247	156179	309353	392501	1.59829	0.676528	0.0339918	0.805556	0.712018
Com_3010_neg	Motesanib	C22 H23 N5 O	373.192	11.217	Full match	No results	No results	753614	1.04839e+06	1.64887e+06	1.28438e+06	380792	668338	1.94753e+06	423093	649872	1.13094e+06	1.96101e+06	1.76409e+06	0.734382	-0.445397	0.451701	0.666667	0.550274
Com_3031_neg	Vernodalol	C20 H24 O8	392.146	7.999	Full match	No results	No results	765518	612677	848385	1.19978e+06	531210	973883	636356	889223	602956	506447	871594	456478	1.24436	0.315399	0.227262	0.694444	0.316258
Com_3033_neg	Picrocrocin	C16 H26 O7	330.167	11.57	Full match	No results	No results	911252	1.24336e+06	1.35906e+06	730153	1.35061e+06	595930	601280	405908	457990	277858	515190	522853	2.22588	1.15438	0.00169816	0.972222	1.16072
Com_3045_neg	Prednicarbate	C27 H36 O8	488.241	11.491	Full match	No results	No results	646826	907766	647550	635910	805315	736790	1.12081e+06	1.19745e+06	796600	460065	982656	746144	0.825863	-0.276026	0.35519	0.722222	0.256036
Com_3049_neg	7-Methyl-3-methyleneoctyl 4-methylbenzenesulfonate	C17 H26 O3 S	310.162	8.186	Full match	No results	No results	377883	429686	441439	312182	334755	420901	591879	378867	248230	192470	414198	352834	1.06352	0.0888423	0.521098	0.611111	0.231343
Com_3062_neg	3-Mercaptopropane-1,2-diol	C3 H8 O2 S	108.024	13.806	Full match	No results	No results	815576	901691	757548	1.00196e+06	1.03355e+06	1.32283e+06	665297	391550	400513	404419	361553	348897	2.26774	1.18126	7.04932e-05	1	1.2513
Com_3076_neg	Methyldopa	C10 H13 N O4	211.084	6.422	Full match	No results	No results	1.26851e+06	1.28732e+06	1.42037e+06	1.40412e+06	1.24503e+06	1.09458e+06	426590	779875	382279	382467	376440	908094	2.37117	1.2456	0.00187738	1	1.38087
Com_308_neg	18-┑-Glycyrrhetinic acid	C30 H46 O4	470.338	13.646	Full match	Full match	No results	1.29598e+07	1.74504e+07	8.93687e+06	1.81545e+07	1.61814e+07	1.39573e+07	6.29513e+06	7.1299e+06	3.20189e+07	5.57907e+06	3.07218e+07	2.40552e+07	0.828356	-0.271677	0.881428	0.5	0.210661
Com_3091_neg	Pyridine	C5 H5 N	79.0418	6.641	Full match	No results	No results	993677	1.27675e+06	1.34362e+06	689665	1.06902e+06	1.04028e+06	412931	916749	652989	603226	855393	536078	1.61238	0.689188	0.0105115	0.944444	0.729999
Com_3092_neg	Phenprocoumon	C18 H16 O3	280.11	8.642	Full match	No results	No results	204761	167435	326663	285613	201647	103155	352084	381188	155668	227712	432945	320675	0.689351	-0.53669	0.125026	0.777778	0.728514
Com_3097_neg	methyl eugenol	C11 H14 O2	178.099	7.638	Full match	No results	No results	510240	377107	735563	409241	545119	379218	368237	338000	297533	315377	778758	304208	1.23079	0.29958	0.216654	0.833333	0.429838
Com_3098_neg	Aspulvinone E	C17 H12 O5	296.068	15.101	Full match	No results	No results	513135	638859	678641	1.21302e+06	574456	584657	428951	393294	250109	472747	465253	514665	1.66445	0.735045	0.0138203	0.972222	0.731522
Com_3116_neg	acrovestone	C32 H42 O8	554.29	13.45	Full match	No results	No results	304048	330444	292528	295500	303897	290870	185558	157099	135715	1.51108e+06	235224	191151	0.752243	-0.410729	0.652045	0.833333	0.324946
Com_3119_neg	THREO-SPHINGOSINE, (-)-	C18 H37 N O2	299.281	14.893	Full match	No results	No results	552866	540943	1.79984e+06	634822	292966	429064	192065	183152	150855	170349	365818	328770	3.0557	1.6115	0.00857414	0.944444	1.49227
Com_3155_neg	Nostocyclopeptide A3	C41 H56 N8 O9	804.414	12.272	Full match	No results	No results	380152	505399	420553	368824	375118	433822	1.06096e+06	284037	191808	265845	330265	262854	1.03677	0.0521023	0.423267	0.833333	0.322758
Com_3165_neg	4-Methoxyaniline	C7 H9 N O	123.068	3.411	Full match	No results	No results	1.00081e+06	866481	1.10972e+06	1.17142e+06	824546	720654	522051	420426	395955	378771	773751	476603	1.91863	0.940074	0.000661151	0.972222	0.998767
Com_3170_neg	(2S,3S)-2-hydroxytridecane-1,2,3-tricarboxylic acid	C16 H28 O7	332.183	8.133	Full match	No results	No results	347427	298040	408309	283943	286927	274181	175840	1.9249e+06	210115	131783	331378	253156	0.627262	-0.672861	0.941325	0.722222	0.209
Com_3173_neg	TMPTMA	C18 H26 O6	338.174	9.281	Full match	No results	No results	251339	410065	542154	785030	375140	2.75083e+06	742605	649446	453603	300900	543747	551042	1.57791	0.658019	0.717605	0.555556	0.280368
Com_3199_neg	Pivagabine	C9 H17 N O3	187.12	7.902	Full match	No results	No results	2.47034e+06	858095	1.1944e+06	897026	514661	1.96808e+06	770723	531058	525793	425825	756918	544659	2.22297	1.15249	0.0327846	0.861111	1.01797
Com_3204_neg	NS1800000	C8 H9 N O4	183.052	2.159	Full match	No results	No results	1.69589e+06	1.71819e+06	1.67608e+06	1.82951e+06	1.23459e+06	1.59934e+06	521022	746483	463522	439769	1.41934e+06	835902	2.20369	1.13992	0.00392003	0.972222	1.30801
Com_3213_neg	millettone	C22 H18 O6	378.11	7.608	Full match	No results	No results	248414	324370	254509	245083	228350	378436	174907	524060	172885	121450	217358	206035	1.18527	0.245212	0.25518	0.833333	0.399739
Com_3225_neg	Ethyl 1H-imidazol-2-ylacetate	C7 H10 N2 O2	154.073	7.879	Invalid mass	No results	No results	1.03778e+06	1.23454e+06	1.05264e+06	868239	892864	1.09728e+06	731691	742932	420970	572060	653737	512202	1.70172	0.766991	0.000797487	1	0.807525
Com_3226_neg	4-(4-{[3-(1-Piperidinyl)propyl]amino}-2-quinolinyl)benzoic acid	C24 H27 N3 O2	389.211	9.746	Full match	No results	No results	737601	965389	257773	237614	712856	237709	482646	923888	800048	257623	1.1187e+06	1.06883e+06	0.676939	-0.562901	0.234973	0.75	0.800875
Com_3241_neg	mephenesin	C10 H14 O3	182.094	10.934	Full match	No results	No results	725805	826521	893809	909676	709720	1.00759e+06	1.94592e+06	738708	443380	350713	500822	669436	1.09123	0.12596	0.351985	0.777778	0.380944
Com_3244_neg	Setileuton	C22 H17 F4 N3 O4	463.118	6.977	Full match	No results	No results	100790	340832	1.07937e+06	2.67828e+06	406118	1.49534e+06	217319	416183	245631	151141	344669	408775	3.42023	1.77409	0.164625	0.694444	1.20227
Com_3278_neg	1-Bromo-3,7-dimethyloctane	C10 H21 Br	220.084	8.834	Full match	No results	No results	1.10783e+06	749878	2.20236e+06	489433	1.12753e+06	1.70242e+06	669802	1.44495e+06	517504	600985	1.24173e+06	1.08202e+06	1.32796	0.409209	0.413207	0.638889	0.408716
Com_328_neg	13-KODE	C18 H30 O3	294.218	13.082	Full match	No results	No results	3.60488e+07	4.56287e+07	4.62765e+07	5.19171e+07	3.88159e+07	5.12446e+07	2.34468e+07	2.88879e+07	1.57124e+07	1.67663e+07	3.25044e+07	3.186e+07	1.80946	0.855562	0.0033934	1	0.933958
Com_331_neg	1-(3-((2',4'-Dimethyl-[4,5'-bithiazol]-2-yl)amino)phenyl)ethanone	C16 H15 N3 O S2	329.065	8.047	Full match	No results	No results	1.38715e+06	1.41997e+06	1.4552e+06	1.32547e+06	1.34102e+06	1.32305e+06	875206	913551	730583	606862	1.15512e+06	979099	1.56867	0.649541	0.00343045	1	0.704582
Com_3328_neg	hexamidine	C20 H26 N4 O2	354.204	13.801	Full match	No results	No results	956948	755204	653800	1.1494e+06	671071	1.58687e+06	1.00257e+06	1.69053e+06	927707	238057	1.25116e+06	943057	0.953778	-0.0682739	0.888644	0.583333	0.156135
Com_3339_neg	(1beta,3beta,5beta,25S)-3-Hydroxyspirostan-1-yl beta-D-ribopyranoside	C32 H52 O8	564.365	13.058	Full match	No results	No results	335611	349299	371586	317691	337549	332058	205920	203053	455176	184818	283237	250866	1.29103	0.368525	0.0739836	0.833333	0.460888
Com_3343_neg	Vinorelbine	C45 H54 N4 O8	778.395	1.138	Full match	No results	No results	246983	301314	288440	254896	275770	295467	279670	296559	186628	218518	443452	347739	0.938115	-0.0921627	0.849387	0.555556	0.2446
Com_334_neg	1,1'-(5-Phenyl-3-cyclopentene-1,3-diyl)bis(4-chlorobenzene)	C23 H18 Cl2	364.078	7.983	Full match	No results	No results	1.1779e+06	797937	1.36514e+06	726722	1.22408e+06	747532	1.01021e+06	500507	439056	339985	1.13033e+06	950760	1.38173	0.466472	0.137339	0.75	0.685762
Com_3358_neg	Betamipron	C10 H11 N O3	193.073	11.257	Full match	No results	No results	772357	878103	788261	786189	858597	846107	447180	488938	380425	405555	729479	576288	1.62808	0.703174	0.00299098	1	0.765476
Com_3360_neg	Benalfocin	C11 H14 Cl N	195.081	4.258	Full match	No results	No results	667776	629534	660763	695347	771058	660238	622524	597373	452487	401952	772279	635787	1.17296	0.230153	0.128605	0.805556	0.312006
Com_338_neg	Robustaol A	C25 H30 O9	474.188	8.729	Full match	No results	No results	5.591e+07	6.7779e+07	7.18463e+07	4.33903e+07	5.04919e+07	6.38087e+07	6.86917e+07	6.27696e+07	3.48941e+07	3.028e+07	4.54439e+07	4.2028e+07	1.24328	0.314157	0.145192	0.75	0.366803
Com_3393_neg	Pyrrolo[1,2-a]pyrazine-3,6(4H,7H)-dione	C7 H6 N2 O2	150.042	7.122	Full match	No results	No results	1.4464e+06	1.47845e+06	1.36348e+06	1.44332e+06	1.485e+06	1.27613e+06	571907	394304	365758	492125	922463	857645	2.35636	1.23656	0.00194092	1	1.37179
Com_339_neg	Benfotiamine	C19 H23 N4 O6 P S	466.11	7.57	Full match	No results	No results	3.71933e+06	1.11867e+07	2.95763e+07	4.64448e+07	1.354e+07	4.42458e+07	2.11222e+07	1.759e+07	1.32231e+07	1.23735e+07	1.56467e+07	1.43036e+07	1.57771	0.657828	0.719109	0.555556	0.2757
Com_3419_neg	N-(3-Carboxypropanoyl)-5-hydroxynorvaline	C9 H15 N O6	233.089	13.969	Full match	No results	No results	1.66085e+06	1.72531e+06	2.09815e+06	2.0481e+06	1.9662e+06	1.69342e+06	655450	906843	703160	728648	1.01994e+06	1.11252e+06	2.18315	1.12641	7.34141e-05	1	1.18103
Com_3423_neg	L787257	C17 H13 Cl N2 O2 S	344.039	11.232	Full match	No results	No results	432553	474065	463721	413000	459007	409157	318401	288755	244638	223045	407447	347179	1.44933	0.535389	0.00672637	1	0.591848
Com_345_neg	Maslinic acid	C30 H48 O4	472.354	14.235	Full match	No results	No results	2.69198e+07	5.01015e+07	2.31409e+08	9.39748e+07	3.31115e+07	7.47575e+07	2.64424e+07	2.83015e+07	3.52979e+07	1.97969e+07	3.64141e+07	4.37423e+07	2.68572	1.42531	0.0689889	0.805556	1.10432
Com_3463_neg	3-(Trifluoromethyl)phenylalanine	C10 H10 F3 N O2	233.065	14.567	Full match	No results	No results	75918.5	113215	80646.6	87615.2	82507.1	108924	99497.3	56755.3	42197.4	47434.3	67620.6	77323.1	1.40427	0.489815	0.0371985	0.861111	0.552468
Com_3470_neg	N-(6-Oxo-6H-benzo(c)chromen-2-yl)methanesulfonamide	C14 H11 N O4 S	289.04	12.046	Full match	No results	No results	1.62267e+06	1.56945e+06	2.0817e+06	1.1995e+06	1.55731e+06	1.36224e+06	450737	484972	304030	284180	1.04985e+06	932516	2.67887	1.42162	0.00337268	1	1.65693
Com_3472_neg	Premithramycin A1	C27 H28 O12	544.156	11.176	Full match	No results	No results	422651	623226	463268	426010	432324	437123	293603	284380	231776	201589	403600	322169	1.61452	0.691101	0.00269705	1	0.739918
Com_3482_neg	(4E,5Z)-3-Hydroxy-4,5-bis(hydroxyimino)-2-pyrrolidinone	C4 H5 N3 O4	159.029	3.313	Full match	No results	No results	1.02312e+06	858583	753832	902291	1.27691e+06	1.04095e+06	505780	610651	455418	405426	620634	781086	1.73297	0.793244	0.00122517	0.972222	0.832353
Com_34_neg	Alpha-Linolenic acid	C18 H30 O2	278.224	14.172	Full match	No results	No results	8.48082e+07	4.48731e+08	5.97701e+08	1.95254e+09	5.38486e+08	1.01124e+09	3.25346e+08	3.11778e+08	3.24332e+08	9.55362e+07	3.24043e+08	5.22061e+08	2.43472	1.28376	0.229705	0.805556	0.943735
Com_3509_neg	N-{[1-Cyclohexyl-2-(3-furyl)-1H-benzimidazol-5-yl]carbonyl}tryptophan	C29 H28 N4 O4	496.21	11.879	Full match	No results	No results	472301	613159	626416	608549	453044	565944	1.56956e+06	966107	478501	319822	704189	662933	0.710345	-0.493407	0.37456	0.722222	0.384963
Com_3533_neg	Rebimastat	C23 H41 N5 O5 S	499.284	11.74	Full match	No results	No results	418715	542692	434172	477280	558160	420208	279483	396865	343850	343170	1.04426e+06	287735	1.05783	0.0811014	0.439469	0.833333	0.326367
Com_3562_neg	L-(-)-Threonine	C4 H9 N O3	119.058	10.075	Full match	No results	No results	1.04966e+06	874366	965480	1.2105e+06	1.14319e+06	1.01874e+06	588861	526745	581240	481937	943394	533705	1.71284	0.776387	0.00117253	0.972222	0.829404
Com_3565_neg	4-Nitro-o-anisidine	C7 H8 N2 O3	168.053	7.276	Full match	No results	No results	687682	893031	624070	1.0324e+06	995749	506396	440606	305917	283868	227813	796384	433965	1.90445	0.929374	0.010725	0.916667	1.06951
Com_3579_neg	5,6,7-Trifluorotryptophan	C11 H9 F3 N2 O2	258.062	9.42	Full match	No results	No results	462753	626913	643199	443515	451347	512837	644409	1.39251e+06	422457	460664	861424	672384	0.705134	-0.50403	0.192682	0.722222	0.476035
Com_3593_neg	Azelnidipine	C33 H34 N4 O6	582.245	11.603	Full match	No results	No results	507016	534683	506704	477781	495676	481143	903365	635948	569388	270279	431850	411033	0.932071	-0.101488	0.998049	0.5	0.00438701
Com_3599_neg	(+)-ainsliadimer A	C30 H34 O7	506.231	9.636	Full match	No results	No results	535516	396886	731401	963597	524434	747390	287156	321318	273565	240231	491701	387293	1.94838	0.962276	0.00315827	0.972222	0.97363
Com_35_neg	(2R)-2,3-Dihydroxypropanoic acid	C3 H6 O4	106.026	1.384	Invalid mass	Invalid mass	No results	4.90976e+08	5.05433e+08	6.63496e+08	5.12579e+08	5.08173e+08	3.79312e+08	2.41118e+08	2.34201e+08	2.29392e+08	1.89242e+08	3.02194e+08	2.40556e+08	2.12985	1.09075	1.48359e-05	1	1.11611
Com_3633_neg	3-(6-hydroxyindol-3-yl)lactic acid	C11 H11 N O4	221.068	2.312	Full match	No results	No results	827558	690701	651622	693326	990493	655266	496398	359290	311725	318620	462850	674220	1.71894	0.781523	0.00384132	0.944444	0.853626
Com_363_neg	altersolanol A	C16 H16 O8	336.083	7.008	Full match	No results	No results	1.45592e+07	2.22378e+07	2.95246e+07	3.00735e+07	1.6344e+07	2.9065e+07	1.23978e+08	1.86769e+08	8.85828e+07	9.374e+07	2.75243e+08	1.97683e+08	0.146796	-2.76812	1.6867e-05	1	2.84222
Com_3655_neg	1-Palmitoyl lysophosphatidic acid	C19 H39 O7 P	410.244	13.218	Full match	No results	No results	233607	245515	292253	217978	233871	239777	140450	133989	110302	101355	194093	170321	1.72015	0.782532	0.00157642	1	0.843868
Com_365_neg	Chaksine	C22 H38 N6 O4	450.296	14.166	Full match	No results	No results	2.74462e+06	2.60421e+06	4.59862e+06	4.10918e+06	3.35178e+06	3.19398e+06	2.59057e+06	2.82577e+06	2.39562e+06	2.08702e+06	5.53732e+06	3.09563e+06	1.11172	0.152798	0.424788	0.722222	0.314267
Com_3690_neg	MFCD00010043	C16 H10 S	234.051	8.241	Full match	No results	No results	750175	795326	1.21096e+06	772167	651072	761413	516115	256645	350501	309704	329467	410199	2.27425	1.18539	9.33315e-05	1	1.22855
Com_3735_neg	Propylparaben	C10 H12 O3	180.079	11.283	Full match	No results	No results	237748	260230	238881	222441	233563	232373	148657	143060	122349	107558	199816	168295	1.60187	0.679753	0.00233989	1	0.733179
Com_375_neg	taxifolin	C15 H12 O7	304.057	8.714	Partial match	No results	Full match	2.32935e+07	1.86301e+08	1.29307e+08	3.3312e+08	6.71463e+07	3.04755e+08	3.01791e+07	2.84655e+07	1.66757e+07	8.01613e+06	1.16469e+07	1.94996e+07	9.11859	3.18881	0.00320967	0.944444	2.98437
Com_3765_neg	3,4,5-Trimethoxyphenylacetic acid	C11 H14 O5	226.083	5.099	Full match	No results	No results	492167	1.13452e+06	701778	977080	1.22113e+06	877809	701659	717955	522482	557429	823028	631287	1.36689	0.450902	0.109387	0.777778	0.417958
Com_377_neg	Dithizone	C13 H12 N4 S	256.078	1.578	Full match	No results	No results	1.18735e+07	9.5996e+06	1.00921e+07	1.01684e+07	9.86579e+06	1.10048e+07	8.70077e+06	6.05606e+06	7.20685e+06	4.49858e+06	7.83778e+06	3.65536e+06	1.64941	0.721952	0.0100695	1	0.811897
Com_3787_neg	2,3,6-Pyridinetriol	C5 H5 N O3	127.026	15.062	Full match	No results	No results	366955	469677	382249	604844	557896	475229	210685	211815	187448	206994	242382	228132	2.21899	1.1499	5.25929e-05	1	1.16459
Com_3788_neg	1-(beta-D-Ribofuranosyl)-1,2-dihydropyrimidine	C9 H14 N2 O4	214.094	7.183	Full match	No results	No results	1.06877e+06	645490	838548	769671	448489	621524	408932	316622	347411	250287	470258	316485	2.08175	1.0578	0.000959852	0.972222	1.06416
Com_378_neg	MFCD00035791	C12 H22 O3	214.156	10.875	Full match	No results	No results	1.43339e+08	1.82761e+08	1.83469e+08	9.98269e+07	5.0307e+07	9.58854e+07	4.25673e+07	2.15361e+07	6.48906e+07	1.01703e+08	2.80286e+08	1.45907e+08	1.15025	0.201949	0.405187	0.611111	0.656971
Com_37_neg	Malondialdehyde	C3 H4 O2	72.0209	1.299	Full match	No results	No results	1.88895e+09	8.53573e+08	2.29685e+09	1.56386e+09	2.11953e+09	4.03123e+08	9.9776e+08	6.97773e+08	2.03406e+08	8.0237e+07	1.26966e+09	2.63206e+08	2.59846	1.37766	0.0473642	0.861111	1.87416
Com_3812_neg	Athamantin	C24 H30 O7	430.197	10.905	Full match	No results	No results	39698.5	41613.1	42815.9	41076.8	40371.7	40227	27338.3	28806.9	21124.7	18990.4	37701	30834.8	1.49156	0.57682	0.00877352	1	0.643404
Com_3813_neg	4-Cyano-DL-Phenylalanine	C10 H10 N2 O2	190.074	4.552	Full match	No results	No results	728484	735556	716852	1.09893e+06	869088	798341	365123	365714	310845	239903	448291	471084	2.24777	1.16849	9.61871e-05	1	1.22088
Com_382_neg	2-(3-CARBOXYPROPIONYL)-6-HYDROXY-CYCLOHEXA-2,4-DIENE CARBOXYLIC ACID	C11 H12 O6	240.063	8.326	Full match	No results	No results	1.11202e+06	1.4994e+06	1.28633e+06	1.22351e+06	1.33287e+06	1.20196e+06	911342	935981	923769	979480	1.52784e+06	888846	1.24141	0.31198	0.0418499	0.833333	0.348787
Com_3835_neg	Aniline	C6 H7 N	93.0574	5.019	Full match	No results	No results	758465	846220	916591	526231	749189	1.11834e+06	544763	408885	316288	306813	659655	333298	1.91269	0.935601	0.00262263	0.944444	0.988567
Com_384_neg	2-C-methylerythritol 4-phosphate	C5 H13 O7 P	216.039	1.899	Full match	No results	No results	1.26788e+07	1.07681e+07	1.29118e+07	1.43443e+07	1.1272e+07	1.6981e+07	1.47262e+07	9.66633e+06	9.43587e+06	7.04812e+06	1.30012e+07	1.38099e+07	1.16648	0.222157	0.229735	0.638889	0.274784
Com_3865_neg	stellettin L	C30 H42 O4	466.307	14.268	Full match	No results	No results	376029	381574	378158	375774	366367	348056	230856	208571	176296	148389	291619	252226	1.70186	0.767112	0.00241489	1	0.831012
Com_3887_neg	2-oxosuccinamic acid	C4 H5 N O4	131.021	12.368	Full match	No results	No results	474167	523942	545376	327955	613624	537099	393648	273627	282291	221029	375924	407948	1.54629	0.628807	0.00828557	0.916667	0.659985
Com_38_neg	Pyruvic acid	C3 H4 O3	88.0158	1.579	Full match	No results	No results	4.31017e+08	3.92608e+08	4.56523e+08	4.51705e+08	4.11394e+08	3.93692e+08	2.62825e+08	2.24778e+08	1.9013e+08	1.78912e+08	3.3392e+08	2.52894e+08	1.75754	0.813558	0.00107122	1	0.871563
Com_3906_neg	taurolithocholic acid sulfate	C26 H45 N O8 S2	563.259	11.907	Full match	No results	No results	274256	283332	302076	264215	275530	257890	245126	867022	398515	143193	332206	183163	0.764005	-0.388346	0.756302	0.5	0.127999
Com_390_neg	Diosmin	C28 H32 O15	608.173	9.433	Full match	No results	No results	905060	4.65983e+06	2.94349e+06	1.75557e+06	896451	7.04569e+06	2.31628e+06	8.26328e+06	1.02772e+06	1.02731e+06	1.20923e+06	2.88551e+06	1.08827	0.122041	0.821494	0.5	0.197347
Com_3929_neg	4-Hydroxy-2-oxoglutaric acid	C5 H6 O6	162.016	2.705	Full match	No results	No results	620994	574565	631327	508007	728604	754645	387767	372334	419069	286228	579785	339232	1.60129	0.679235	0.00244235	0.944444	0.7208
Com_3937_neg	3'-Hydroxycotinine, Cis-	C10 H12 N2 O2	192.089	5.866	Full match	No results	No results	1.4617e+06	519636	562023	449824	587906	479223	406182	420513	292908	257935	533602	388590	1.76556	0.820126	0.0415389	0.916667	0.764309
Com_3943_neg	DC2810000	C9 H12 O3	168.078	3.624	Full match	No results	No results	736904	601923	945760	938879	714885	730726	493058	574249	355443	336975	669444	763309	1.46252	0.54846	0.0290561	0.861111	0.645576
Com_3944_neg	musk ambrette	C12 H16 N2 O5	268.105	3.394	Full match	No results	No results	690291	881040	555855	557160	685006	563830	463648	536809	407416	348674	589263	471050	1.3963	0.481609	0.0109433	0.916667	0.501595
Com_3951_neg	AM9627000	C8 H7 N O3	165.042	13.6	Full match	No results	No results	870359	1.10752e+06	1.22726e+06	1.08033e+06	1.01135e+06	920280	587402	600366	332062	227771	530796	791661	2.02508	1.01798	0.00755637	1	1.16513
Com_396_neg	Coumarone	C8 H6 O	118.041	7.364	Full match	No results	No results	3.83912e+06	6.59665e+06	7.52816e+06	4.62224e+06	5.29035e+06	1.82772e+07	1.0973e+07	1.82211e+07	1.19137e+07	6.58288e+06	1.02841e+07	6.86848e+06	0.711772	-0.490514	0.152621	0.75	0.652134
Com_3976_neg	(+)-Flesinoxan	C22 H26 F N3 O4	415.191	14.788	Full match	No results	No results	169588	151294	201705	112377	267089	162085	34686.4	177465	21854.5	57306.5	33335.6	30587.6	2.99558	1.58284	0.00522403	0.888889	2.00441
Com_3995_neg	enniatin B4	C34 H59 N3 O9	653.427	14.954	Full match	No results	No results	952526	748756	776309	1.03675e+06	918595	378881	184368	203248	130508	122293	205350	385476	3.9081	1.96647	0.000109056	0.972222	2.07026
Com_400_neg	Bruceine A 綺델綾羹A	C26 H34 O11	522.208	9.882	Not the top hit	No results	Full match	1.34449e+07	1.25262e+07	1.37812e+07	1.64956e+07	9.19315e+06	1.68322e+07	1.28191e+07	1.30035e+07	1.16866e+07	7.4451e+06	1.74712e+07	1.5381e+07	1.05741	0.0805301	0.651936	0.583333	0.170529
Com_4010_neg	4-[2-(4,4,5,5-Tetramethyl-1,3,2-dioxaborolan-2-yl)ethyl]phenyl acetate	C16 H23 B O4	290.169	7.678	Full match	No results	No results	91796.2	97822.2	102401	126500	89330	189742	73488.8	79052.8	59940.1	51340	182867	558962	0.693672	-0.527675	0.975075	0.694444	0.494658
Com_4039_neg	N(4)-phosphoagmatine	C5 H15 N4 O3 P	210.088	14.891	Full match	No results	No results	232247	162524	157299	151444	207261	170134	122085	114116	75213.6	82124.4	179562	110499	1.5812	0.661022	0.010272	0.888889	0.741801
Com_405_neg	Hex-2-ulofuranosyl hexopyranosyl-(1->6)hexopyranoside	C18 H32 O16	504.167	1.395	Full match	No results	No results	2.15944e+07	2.77457e+07	3.76545e+07	4.56107e+07	3.22373e+07	2.60071e+07	1.70549e+07	1.57644e+07	1.14665e+07	1.61242e+07	2.07664e+07	1.69891e+07	1.94416	0.959147	0.000951536	1	0.964612
Com_40_neg	Epicatechin 깊랏꿱羹	C15 H14 O6	290.078	7.64	Full match	No results	Full match	1.57598e+08	2.97714e+08	2.23967e+08	1.01462e+09	1.61564e+08	9.76439e+08	1.87038e+09	1.78556e+09	1.24604e+09	1.34044e+09	1.25675e+09	2.59823e+09	0.280459	-1.83414	0.00536062	1	2.29859
Com_4107_neg	(5-Chloro-1-pentyn-1-yl)(triethyl)silane	C11 H21 Cl Si	216.11	8.831	Full match	No results	No results	461891	516377	602418	666915	580016	594666	310114	411945	278120	292077	390680	330905	1.69938	0.76501	9.37586e-05	1	0.791971
Com_4139_neg	L-Lombricine	C6 H15 N4 O6 P	270.073	3.224	Full match	No results	No results	575325	615261	568369	511338	577642	543694	340367	344939	307347	270743	472420	399809	1.58812	0.66732	0.0012655	1	0.711998
Com_415_neg	aldioxa	C4 H7 Al N4 O5	218.024	5.858	Full match	No results	No results	785722	8.71734e+06	1.27212e+07	1.5711e+07	5.64723e+06	1.25884e+07	9.15065e+07	6.90872e+07	6.75891e+07	6.83451e+07	7.53077e+07	6.58024e+07	0.12835	-2.96184	0.00332076	1	3.51975
Com_41_neg	Diosmetin-7-O-┑-D-glucopyranoside 窮秊컁羹-7-O-┑-D-팥境鎌宓	C22 H22 O11	462.115	7.832	Partial match	No results	Full match	7.93295e+06	1.3026e+07	2.04201e+07	3.50962e+07	1.36176e+07	3.67504e+07	1.80041e+07	2.25124e+07	2.37505e+07	1.63227e+07	1.87543e+07	1.49778e+07	1.10953	0.149947	0.913625	0.555556	0.205161
Com_4220_neg	Bambuterol	C18 H29 N3 O5	367.209	14.818	Full match	No results	No results	201934	220443	453392	155235	514042	270169	304974	86195.4	146001	135159	266948	322747	1.43834	0.524401	0.222276	0.694444	0.609413
Com_4234_neg	Diethoxymethylsilane	C5 H14 O2 Si	134.077	2.781	Full match	No results	No results	957028	805719	698547	518141	555449	502564	311238	381690	245683	276481	453645	366668	1.98361	0.988128	0.000776115	1	1.01021
Com_4242_neg	2-Oxotetrahydrofuran-3,4-diyl diacetate	C8 H10 O6	202.047	10.385	Full match	No results	No results	622055	820889	819434	917828	654548	691736	384809	296218	351435	265521	690968	386106	1.90584	0.93043	0.00250571	0.944444	1.0218
Com_4257_neg	(1S)-1-Carboxy-2-(1H-imidazol-4-yl)-N,N,N-trimethylethanaminium	C9 H16 N3 O2	198.125	13.846	Full match	No results	No results	504423	482083	689427	612604	377982	639395	448249	407665	256511	328974	555918	352076	1.40714	0.492761	0.0338761	0.861111	0.528449
Com_4259_neg	Phosphoarginine	C6 H15 N4 O5 P	254.078	2.371	Full match	No results	No results	638804	643164	826890	763606	806589	892301	381074	366503	316106	231546	459062	401214	2.12078	1.0846	0.000132691	1	1.13622
Com_4264_neg	2-(1-Cyclohexen-1-yl)ethyl 4-methylbenzenesulfonate	C15 H20 O3 S	280.112	8.658	Full match	No results	No results	194382	234478	204955	195216	178133	191418	469639	525159	289162	145621	991555	811555	0.370769	-1.43141	0.0355315	0.833333	1.37011
Com_426_neg	DL-Arginine	C6 H14 N4 O2	174.111	1.3	Full match	No results	No results	1.32506e+07	2.21861e+07	1.30054e+07	1.71685e+07	2.76754e+07	2.27406e+07	7.15525e+06	1.30838e+07	3.07932e+06	4.1908e+06	6.79052e+06	4.63631e+06	2.97993	1.57528	0.00123361	0.972222	1.72904
Com_429_neg	Phthalic acid	C8 H6 O4	166.026	10.678	Full match	No results	No results	6.14174e+06	1.92519e+07	1.32123e+07	1.35389e+07	9.35756e+06	1.1135e+07	5.35738e+06	6.16331e+06	6.48975e+06	3.90622e+06	6.59254e+06	5.2981e+06	2.14857	1.10338	0.00421398	0.916667	1.07304
Com_4310_neg	metharbital	C9 H14 N2 O3	198.1	5.642	Full match	No results	No results	569376	659489	840482	656475	540927	498861	311257	370343	245584	290273	540794	354296	1.7825	0.8339	0.00164817	0.972222	0.893779
Com_4363_neg	10-Bromo-1-decanol	C10 H21 Br O	236.079	10.124	Full match	No results	No results	572334	378499	796294	457538	348749	675524	274962	271862	242204	209945	356800	311710	1.93642	0.953388	0.00348873	0.972222	0.935312
Com_436_neg	Talampicillin	C24 H23 N3 O6 S	481.129	6.59	Full match	No results	No results	1.30721e+06	1.29943e+06	1.33455e+06	1.26333e+06	1.1973e+06	1.22886e+06	965639	867641	721385	631134	1.242e+06	1.02687e+06	1.39893	0.484321	0.0150769	0.944444	0.55058
Com_438_neg	MFCD00004231	C8 H8 O5	184.036	7.942	Full match	No results	No results	8.01008e+06	1.40981e+07	9.88249e+06	1.43338e+07	9.71672e+06	1.13823e+07	6.70673e+06	6.08406e+06	6.09415e+06	4.69541e+06	7.13643e+06	6.14458e+06	1.82911	0.871142	0.000567288	1	0.877203
Com_4397_neg	(+)-gliodaclin C	C22 H16 N4 O3	384.124	6.08	Full match	No results	No results	252103	460954	316042	267631	336085	206726	419471	561241	341846	224469	438567	318003	0.798552	-0.324542	0.232836	0.722222	0.368685
Com_4438_neg	5-Formyluracil	C5 H4 N2 O3	140.023	0.738	Full match	No results	No results	360004	551333	524212	500638	672009	473422	441569	395214	250326	317595	825975	349072	1.19454	0.256455	0.241173	0.777778	0.423653
Com_443_neg	bungeiside C	C19 H26 O11	430.146	8.726	Partial match	No results	Full match	2.81728e+07	1.5687e+07	3.58239e+07	3.68448e+07	1.76595e+07	7.04434e+07	3.83615e+07	3.54189e+07	2.41704e+07	1.21188e+07	2.96681e+07	1.89916e+07	1.28918	0.366458	0.509085	0.583333	0.297434
Com_445_neg	Lactobionic acid	C12 H22 O12	358.11	1.384	Full match	No results	No results	8.87113e+06	9.14818e+06	1.01634e+07	8.68539e+06	9.27262e+06	8.9649e+06	6.96461e+06	6.44247e+06	4.6916e+06	4.92845e+06	8.53099e+06	6.92525e+06	1.43193	0.517964	0.00853384	1	0.575265
Com_446_neg	2-Hydroxy-3-[5-(methylsulfanyl)pentyl]succinate	C10 H16 O5 S	248.071	9.022	Full match	No results	No results	5.41648e+06	5.11025e+06	5.75478e+06	5.56954e+06	4.82268e+06	5.11573e+06	2.24258e+06	2.0343e+06	1.00801e+06	1.08848e+06	2.32245e+06	3.50416e+06	2.6057	1.38167	0.00289049	1	1.56496
Com_4471_neg	PB2100000	C3 H8 O3 S	124.019	11.781	Full match	No results	No results	385081	350034	1.06316e+06	303685	334969	327200	302153	189858	173671	140514	288953	232385	2.08216	1.05808	0.0199212	1	0.981383
Com_4480_neg	3-Phenylpropanoic acid	C9 H10 O2	150.067	6.106	Full match	No results	No results	554521	557667	831218	642069	1.0441e+06	713266	408939	464385	555414	338229	445822	433462	1.64113	0.714689	0.00341704	0.972222	0.715908
Com_4496_neg	Juniperic acid	C16 H32 O3	272.235	14.887	Full match	No results	No results	885195	969282	972025	876311	1.21161e+06	879138	570290	468410	371054	387147	901278	665160	1.72256	0.784556	0.00668387	0.916667	0.892025
Com_4514_neg	1-(Difluoromethyl)-4-(ethylsulfanyl)benzene	C9 H10 F2 S	188.046	8.147	Full match	No results	No results	363093	355782	372751	337762	428515	429954	219274	218651	179324	156234	287883	239431	1.75881	0.814601	0.000532512	1	0.86105
Com_4515_neg	N,N,N-Trimethyl-2-phosphonoethanaminium	C5 H15 N O3 P	168.078	12.055	Invalid mass	No results	No results	526968	906710	651531	505351	506292	747118	532609	385905	271782	291726	772363	873529	1.22893	0.297397	0.247571	0.638889	0.50866
Com_4530_neg	halopemide	C21 H22 Cl F N4 O2	416.144	7.789	Full match	No results	No results	322300	244485	230207	235021	446705	261406	196891	189313	452560	221461	513373	205358	0.978171	-0.0318414	0.858551	0.666667	0.0738012
Com_453_neg	[(6-Bromohexyl)oxy](2-methyl-2-propanyl)diphenylsilane	C22 H31 Br O Si	418.131	1.374	Full match	No results	No results	1.09761e+07	1.19598e+07	1.23917e+07	1.53425e+07	1.18254e+07	1.16183e+07	9.26964e+06	8.20671e+06	5.9702e+06	6.47505e+06	1.05691e+07	8.60981e+06	1.50943	0.594004	0.00318871	1	0.638141
Com_4549_neg	(E)-Diisopropyl azodicarboxylate	C8 H14 N2 O4	202.095	3.385	Full match	No results	No results	529688	589518	557899	475946	540037	431828	311525	340299	277575	293825	390716	302422	1.63065	0.705448	3.04243e-05	1	0.727422
Com_4587_neg	5-Hydroxytryptophol	C10 H11 N O2	177.078	4.621	Full match	No results	No results	811501	629056	600876	803161	807368	807094	323240	336287	294124	317290	405360	519773	2.03047	1.02181	7.71236e-05	1	1.06758
Com_4588_neg	YR0513000	C5 H6 N2 O3	142.037	0.627	Full match	No results	No results	649001	1.0599e+06	862611	725850	683626	662384	276606	217981	259684	280911	469739	429509	2.40038	1.26327	0.000218131	1	1.33431
Com_459_neg	2-{[(3-Hydroxy-2-oxo-2,3-dihydro-1H-indol-3-yl)acetyl]amino}succinate	C14 H12 N2 O7	320.065	7.973	Full match	No results	No results	858037	7.8187e+06	6.50418e+06	3.81654e+06	1.5221e+06	1.1455e+07	9.22381e+06	2.81074e+07	2.93958e+06	2.66714e+06	2.66532e+06	9.70284e+06	0.578138	-0.790514	0.41589	0.611111	0.717136
Com_4603_neg	2-Aminooxazole	C3 H4 N2 O	84.0321	0.566	Full match	No results	No results	565706	520994	536799	533052	448396	506091	268228	318824	175318	190072	298913	258386	2.06065	1.0431	0.000373574	1	1.10439
Com_4615_neg	Metirosine	C10 H13 N O3	195.089	4.542	Full match	No results	No results	478762	408719	559733	355171	466396	356843	286023	298190	222400	187749	383068	418588	1.46191	0.547857	0.0235943	0.861111	0.63821
Com_4624_neg	tert-Butyl(3,4-dichlorobutoxy)diphenylsilane	C20 H26 Cl2 O Si	380.111	15.245	Full match	No results	No results	268233	283848	303542	286524	259797	256154	175496	160052	143852	115869	225051	201514	1.62267	0.698368	0.00275796	1	0.757376
Com_4652_neg	4-(Trimethylsilyl)-3-butyn-2-one	C7 H12 O Si	140.066	8.182	Full match	No results	No results	341677	342165	336401	345930	322540	311545	207252	212257	172430	146236	273869	232408	1.60734	0.684675	0.00244303	1	0.738967
Com_467_neg	3-[1,2-Diphenyl-2-(phenylsulfanyl)ethyl]-1H-indole	C28 H23 N S	405.155	7.533	Full match	No results	No results	1.66622e+07	1.49982e+07	2.13479e+07	2.17506e+07	1.38697e+07	2.56096e+07	2.48662e+07	3.16584e+07	8.25582e+06	6.59834e+06	1.12795e+07	1.49721e+07	1.17011	0.226645	0.320783	0.666667	0.434983
Com_468_neg	Methylophiopogonone A	C19 H16 O6	340.096	1.911	Full match	No results	No results	6.3861e+06	2.01577e+07	2.68069e+07	6.06152e+07	1.42143e+07	3.59116e+07	1.89101e+07	2.39423e+07	3.22066e+07	1.28284e+07	1.86289e+07	1.90165e+07	1.30716	0.386439	0.823128	0.611111	0.235528
Com_470_neg	Benzoic acid	C7 H6 O2	122.036	2.166	Full match	Full match	Full match	2.89458e+07	4.71156e+07	4.17728e+07	3.44255e+07	3.99356e+07	6.55982e+07	4.537e+07	4.88656e+07	3.06199e+07	2.45376e+07	5.14394e+07	5.00775e+07	1.02743	0.0390455	0.863736	0.555556	0.122469
Com_4725_neg	(Z)-2-Butene-1,2,3-tricarboxylic acid	C7 H8 O6	188.031	15.897	Full match	No results	No results	563231	781390	443430	485043	669912	462778	188929	264207	206128	163432	395498	351501	2.16971	1.1175	0.00130765	1	1.20308
Com_4735_neg	tert-Butyl (2-oxooxetan-3-yl)carbamate	C8 H13 N O4	187.084	8.185	Full match	No results	No results	551526	397457	449676	330191	369148	372094	253705	261355	165312	138350	296796	281303	1.76837	0.822419	0.00391773	1	0.895008
Com_4738_neg	Fumarylacetoacetic acid	C8 H8 O6	200.031	0.525	Full match	No results	No results	554240	271924	338913	398475	720102	517237	331955	334166	258602	240423	291564	784544	1.2497	0.321579	0.277403	0.75	0.417885
Com_4747_neg	4-O-beta-D-Xylopyranosyl-D-xylopyranose	C10 H18 O9	282.094	8.904	Full match	No results	No results	320193	374279	431533	298229	435378	317522	192203	227751	231137	166878	312615	196449	1.6406	0.714227	0.00126655	0.972222	0.74818
Com_4765_neg	flurofamide	C7 H9 F N3 O2 P	217.042	14.867	Full match	No results	No results	342049	415167	253960	326387	244754	487817	194373	210978	160605	126020	290166	199518	1.75189	0.808909	0.00527734	0.944444	0.834536
Com_4775_neg	2'-deoxy-5-methyl-5'-cytidylic acid	C10 H16 N3 O7 P	321.073	6.671	Full match	No results	No results	314158	330075	324924	307348	297745	341612	234074	231107	179653	161358	323351	251469	1.38729	0.472269	0.0168754	0.916667	0.535528
Com_4788_neg	(4-Chloro-3-nitrophenyl)(4-phenyl-1-piperazinyl)methanone	C17 H16 Cl N3 O3	345.088	3.11	Full match	No results	No results	212937	218589	200717	196343	197765	362479	140053	266713	512126	320416	224528	164618	0.852853	-0.229632	0.68457	0.583333	0.365018
Com_4795_neg	5-Methylangelicin	C12 H8 O3	200.048	5.06	Full match	No results	No results	749983	795105	785961	553329	597973	391755	214431	262501	160984	147562	512072	285322	2.44752	1.29132	0.00203425	0.972222	1.44554
Com_481_neg	Hex-1-enylbenzene	C12 H16	160.125	9.195	Full match	No results	No results	1.01313e+07	3.55702e+07	1.97589e+07	2.33148e+07	1.3256e+07	2.5791e+07	1.78175e+07	1.51511e+07	1.0151e+07	7.03693e+06	1.31873e+07	1.13008e+07	1.71241	0.776028	0.0585987	0.805556	0.739595
Com_4834_neg	2-trans,6-trans-farnesyl diphosphate(3-)	C15 H25 O7 P2	379.11	7.933	Invalid mass	No results	No results	360045	372897	447544	318938	422618	421202	207173	392507	307002	202536	751961	378991	1.04601	0.0648984	0.512037	0.666667	0.334732
Com_4835_neg	4-Oxobutanenitrile	C4 H5 N O	83.0368	4.713	Full match	No results	No results	491267	547220	462986	543815	603186	440936	349421	312323	247040	219857	393127	343263	1.65649	0.728132	0.00118074	1	0.776302
Com_4839_neg	rolitetracycline	C27 H33 N3 O8	527.229	11.485	Full match	No results	No results	341701	385929	344131	332094	338716	339850	314495	344430	499356	160710	500707	406081	0.935591	-0.0960494	0.98641	0.638889	0.136399
Com_4841_neg	medorinone	C9 H8 N2 O	160.063	6.182	Full match	No results	No results	449112	582931	414266	414677	423654	451391	241951	267238	274162	176790	431026	290918	1.62657	0.701834	0.00539221	0.916667	0.766687
Com_484_neg	IN00458	C9 H6 O3	162.031	1.403	Full match	No results	No results	9.71995e+06	9.99171e+06	1.04543e+07	9.51643e+06	1.01464e+07	9.82268e+06	7.63677e+06	7.05891e+06	5.16124e+06	5.40002e+06	9.34726e+06	7.64701e+06	1.41183	0.497564	0.0104972	1	0.555709
Com_4857_neg	Sarmazenil	C15 H14 Cl N3 O3	319.073	11.255	Full match	No results	No results	421750	413925	372452	557492	361556	437383	250641	229453	183443	175335	410679	282774	1.67364	0.742988	0.00581616	0.944444	0.824033
Com_4890_neg	1-Phenyl-1-propanethiol	C9 H12 S	152.066	3.538	Full match	No results	No results	210166	207400	191592	172174	190872	205037	174234	193515	148027	123269	222105	168915	1.14288	0.192676	0.144844	0.722222	0.241582
Com_4927_neg	3-O-feruloyl-D-quinic acid	C17 H20 O9	368.112	10.369	Full match	No results	No results	136262	158901	148782	160943	138748	151278	115669	106805	86124.3	72621	139530	110311	1.41811	0.503969	0.00979725	0.944444	0.555182
Com_4935_neg	Anthraquinone	C14 H8 O2	208.053	14.907	Full match	No results	No results	140695	263229	284618	249413	186087	147091	149556	66614.8	33020.4	56702.4	204283	80227.5	2.15299	1.10634	0.018442	0.861111	1.39076
Com_4983_neg	Fomepizole	C4 H6 N2	82.0528	3.752	Full match	No results	No results	383781	571264	468088	615295	433376	507604	362456	431449	324193	264937	433423	321361	1.39367	0.478886	0.0101947	0.916667	0.495615
Com_4_neg	D-(-)-Quinic acid	C7 H12 O6	192.062	1.501	Full match	Full match	Full match	6.11287e+10	4.74432e+10	47757248150	2.71593e+10	2.4756e+10	3.86652e+10	4.84949e+10	3.67602e+10	3.22207e+10	6.50659e+10	29720094386	45162378444	0.959155	-0.0601639	0.773169	0.444444	0.0980012
Com_5020_neg	2-[(beta-D-Mannopyranosyloxy)methyl]acrylonitrile	C10 H15 N O6	245.089	3.253	Full match	No results	No results	398795	407797	373074	339309	392501	372095	231224	253095	225332	190542	318124	278977	1.52513	0.608935	0.00116823	1	0.646221
Com_5028_neg	Formylkynurenine	C11 H12 N2 O4	236.079	12.164	Full match	No results	No results	500956	807635	646264	637292	629516	475035	239302	306775	206780	168854	394436	233056	2.38619	1.25471	0.00020969	1	1.3252
Com_5036_neg	N~6~-(Trifluoroacetyl)lysine	C8 H13 F3 N2 O3	242.088	3.861	Full match	No results	No results	214952	205534	199957	168754	203011	186635	218360	267443	195089	170479	274585	188436	0.896872	-0.157025	0.305196	0.638889	0.181244
Com_5057_neg	1-EBIO	C9 H10 N2 O	162.079	4.975	Full match	No results	No results	256745	280188	390907	261650	259516	249018	169328	199234	131911	152628	214053	184849	1.61409	0.690717	0.000762827	1	0.714683
Com_5066_neg	2-[4-(4-Chlorophenyl)-4-oxobutyl]-1H-isoindole-1,3(2H)-dione	C18 H14 Cl N O3	327.066	6.244	Full match	No results	No results	77608.9	83821	83805.2	72914.6	75232	78730.4	56780.2	58063.8	47255.6	39320.3	77937.3	59406.3	1.39363	0.478851	0.0123469	0.916667	0.534275
Com_5118_neg	[4-(3,5-Difluorophenyl)-2H-1,2,3-triazol-2-yl](4-morpholinyl)methanone	C13 H12 F2 N4 O2	294.094	6.066	Full match	No results	No results	348602	361811	399432	521681	445888	330296	248118	251632	245079	165401	307411	241568	1.65001	0.722474	0.000956146	1	0.749568
Com_5119_neg	2,5-Dihydropyridine	C5 H7 N	81.0575	11.795	Full match	No results	No results	498484	610829	608869	471143	333674	521975	259270	311198	187144	191111	317769	318773	1.9208	0.941706	0.00075089	1	0.978917
Com_511_neg	MFCD00075980	C11 H12 O4	208.073	8.726	Full match	No results	No results	2.11432e+07	9.71337e+06	2.5772e+07	3.20176e+07	1.6224e+07	5.75076e+07	3.14434e+07	2.83161e+07	2.03005e+07	1.08735e+07	2.27766e+07	1.37361e+07	1.27409	0.349467	0.611954	0.583333	0.258684
Com_5123_neg	Erythorbic acid	C6 H8 O6	176.031	15.885	Full match	No results	No results	372573	348674	469258	456569	364929	466593	150426	179449	168025	173250	259733	284135	2.03997	1.02855	0.000334693	1	1.08888
Com_5142_neg	MU-Ac	C12 H10 O4	218.059	4.819	Full match	No results	No results	363025	871445	496095	359285	262824	407208	225381	334941	176699	187857	320216	335443	1.74617	0.804191	0.0323432	0.916667	0.775492
Com_5148_neg	equilin sulfate	C18 H20 O5 S	348.104	5.77	Full match	No results	No results	301576	350175	310085	286172	289141	287737	224795	202632	247651	135969	258269	304665	1.32817	0.409443	0.0395776	0.888889	0.468355
Com_5192_neg	Fluorescein	C20 H12 O5	332.069	13.639	Full match	No results	No results	331812	204045	274957	313039	222931	310043	160371	267091	168425	112736	350402	280641	1.23675	0.306549	0.2036	0.694444	0.463762
Com_5202_neg	Cinnamtannin A4	C90 H74 O36	1730.39	10.503	Full match	No results	No results	82999.9	94263.8	93890.3	87527.8	81487.2	91596.2	54579.3	81041.3	159200	61356.5	212170	59422.3	0.847072	-0.239444	0.931903	0.666667	0.0675299
Com_520_neg	Queen Bee Acid	C10 H18 O3	186.125	8.605	Full match	No results	No results	1.16666e+07	2.90816e+07	1.65361e+07	8.9024e+06	1.23224e+07	1.21061e+07	2.8475e+07	2.68873e+07	1.05604e+07	9.50994e+06	1.39103e+07	2.01565e+07	0.82754	-0.273099	0.502938	0.583333	0.320041
Com_5231_neg	moniliformin	C4 H2 O3	98	5.077	Full match	No results	No results	534448	469274	407727	672952	578027	609747	235037	231278	222376	173223	304379	263504	2.28856	1.19444	1.55655e-05	1	1.22938
Com_5258_neg	2-pyridone	C5 H5 N O	95.0369	4.543	Full match	No results	No results	472734	392240	340165	367657	420896	208979	167683	174631	171895	109952	224338	166571	2.16997	1.11768	0.000513269	0.972222	1.13859
Com_5279_neg	Egualen	C15 H18 O3 S	278.099	9.652	Full match	No results	No results	192186	207286	207808	193562	178321	200436	161931	157497	142885	119893	182106	149556	1.29078	0.368239	0.00434672	0.972222	0.389963
Com_5300_neg	Aprobarbital	C10 H14 N2 O3	210.1	6.041	Full match	No results	No results	375013	355798	369591	329285	338584	348502	264119	255393	187068	169923	341153	410848	1.29983	0.37832	0.0758232	0.777778	0.504864
Com_5321_neg	epsilon-Caprolactone	C6 H10 O2	114.068	0.717	Full match	No results	No results	273435	347108	381474	249630	328864	252466	216097	174323	126881	153521	232792	277705	1.55164	0.633791	0.00998751	0.916667	0.704781
Com_5334_neg	Razupenem	C18 H21 N3 O4 S2	407.096	7.27	Full match	No results	No results	234565	228394	219413	213262	214816	228769	144887	128636	110505	98174.7	183372	139442	1.66359	0.734303	0.00172052	1	0.786855
Com_533_neg	Sinapinic acid	C11 H12 O5	224.068	3.29	Full match	Full match	Full match	2.1985e+07	1.71822e+07	2.26098e+07	1.632e+07	2.26131e+07	3.38561e+07	4.56848e+07	3.19161e+07	2.90097e+07	2.32138e+07	5.52095e+07	3.66727e+07	0.606956	-0.720336	0.0155217	0.916667	0.754917
Com_5355_neg	MFCD00888473	C24 H42 O7 P2	504.239	9.523	Full match	No results	No results	190876	222638	250590	350257	128736	146634	116074	177256	136698	93442.4	150185	154092	1.55812	0.639807	0.0474777	0.805556	0.609295
Com_5357_neg	4-aminobenzoylglutamic acid	C12 H14 N2 O5	266.089	4.889	Full match	No results	No results	344075	342892	330501	303953	345383	306175	216942	210836	155552	143159	285575	214142	1.60901	0.686173	0.00389308	1	0.751791
Com_5373_neg	Cinnamtannin B2	C60 H48 O24	1152.25	11.656	Full match	No results	No results	123915	132352	127655	175842	240276	116118	338501	360477	141968	185939	347088	199682	0.582184	-0.780453	0.0294141	0.888889	0.824577
Com_5383_neg	3-Isopropyl-2,5-piperazinedione	C7 H12 N2 O2	156.089	9.278	Full match	No results	No results	367088	311382	310259	375969	345341	259639	191032	185703	148382	125655	223768	203688	1.82677	0.869299	0.000290824	1	0.915251
Com_5397_neg	(4Z)-3-(Dihydroxymethylene)-7-methyl-2,6-dioxo-4-octenoic acid	C10 H12 O6	228.062	9.918	Full match	No results	No results	193344	222287	211046	191919	228610	206809	139219	143937	121445	100702	173853	204718	1.41877	0.504644	0.0135704	0.944444	0.567772
Com_540_neg	4-Toluic acid	C8 H8 O2	136.052	8.922	Partial match	Full match	No results	7.56009e+06	5.4664e+07	3.11687e+07	4.26729e+07	1.3464e+07	9.53069e+07	2.6496e+07	7.43614e+07	2.62696e+07	1.84153e+07	1.90105e+07	3.45043e+07	1.22998	0.298636	0.964333	0.555556	0.271756
Com_5412_neg	ortho-Phthalaldehyde	C8 H6 O2	134.036	14.97	Full match	No results	No results	232586	350505	331476	210643	231546	201138	183967	174768	150162	184157	306610	212640	1.28507	0.361847	0.0982327	0.833333	0.412685
Com_5438_neg	N,3,5-Trimethoxy-N-methylbenzamide	C11 H15 N O4	225.099	10.082	Full match	No results	No results	220240	245021	232807	220767	204876	212038	152812	136349	129278	111224	191667	155682	1.52307	0.60698	0.00151463	1	0.646551
Com_5447_neg	UNII:2P8NSB75RS	C42 H64 N12 O12 S2	992.421	11.707	Full match	No results	No results	169269	163561	177381	150547	161547	151926	134670	159176	118667	106770	191875	260648	1.00249	0.00359388	0.738723	0.611111	0.252111
Com_545_neg	Asperuloside	C18 H22 O11	414.114	7.209	Full match	No results	No results	2.92233e+07	1.81201e+07	4.67806e+07	2.46809e+07	5.71672e+07	2.80037e+07	2.82904e+07	3.82928e+07	4.44619e+07	2.57145e+07	9.86053e+07	3.65894e+07	0.750037	-0.414967	0.355598	0.638889	0.500768
Com_5465_neg	Fumarate dianion	C4 H2 O4	113.995	15.254	Invalid mass	No results	No results	244124	281638	344566	367097	387074	312283	149688	161135	124356	156752	263621	281643	1.70312	0.768183	0.00651324	0.916667	0.857702
Com_5489_neg	Succinic acid	C4 H6 O4	118.026	5.164	Full match	No results	No results	340032	218306	216070	189787	238988	179148	125284	116526	98777.1	119448	161907	181333	1.72087	0.783135	0.00199658	0.972222	0.814582
Com_550_neg	Picloxydine	C20 H24 Cl2 N10	474.157	1.393	Full match	No results	No results	1.30096e+07	1.33621e+07	1.39248e+07	1.26832e+07	1.34885e+07	1.31471e+07	1.02846e+07	9.44798e+06	6.90805e+06	7.16874e+06	1.25108e+07	1.02351e+07	1.40774	0.493385	0.0112803	1	0.55236
Com_5524_neg	Rosabulin	C22 H16 N4 O2 S	400.099	3.817	Full match	No results	No results	116455	116231	104148	97891	112266	101464	327245	294526	317843	357137	536800	159387	0.325376	-1.61982	0.00096505	1	1.58891
Com_555_neg	4-(Hydroxymethyl)benzenesulfonic acid	C7 H8 O4 S	188.014	7.089	Full match	No results	No results	789414	842724	1.35986e+06	3.89172e+06	4.25657e+06	4.28636e+06	7.55914e+06	4.47725e+06	8.02612e+06	771654	8.89987e+06	2.51312e+07	0.281173	-1.83047	0.0892283	0.833333	1.7272
Com_5560_neg	Kinobscurinone	C18 H10 O5	306.054	14.544	Full match	No results	No results	214357	242606	496642	306313	362639	362986	85117.8	57358.6	53400.9	38938.9	127358	94003.1	4.35257	2.12187	6.60426e-05	1	2.23909
Com_5568_neg	2,6-Dihydroxy-4-Methoxytoluene	C8 H10 O3	154.061	7.162	No results	No results	Invalid mass	205027	234348	190912	309972	273010	301580	123537	136698	127628	139596	230337	171472	1.63016	0.705009	0.00304314	0.944444	0.73762
Com_5571_neg	Lenvatinib	C21 H19 Cl N4 O4	426.11	9.449	Full match	No results	No results	122598	131047	131765	123951	115343	120813	98280.4	92552.1	83581	73585	111827	86568.8	1.36443	0.4483	0.00195559	1	0.473438
Com_5581_neg	Ulimorelin	C30 H39 F N4 O4	538.296	10.789	Full match	No results	No results	295291	242433	279842	213889	212089	224393	176856	127011	205676	156056	336640	207217	1.21372	0.279431	0.157245	0.833333	0.372885
Com_55_neg	Caffeic acid	C9 H8 O4	180.042	2.477	Not the top hit	Full match	Full match	7.64598e+07	6.71761e+08	3.15426e+08	1.40784e+09	1.04484e+08	1.24457e+09	7.73307e+08	6.59933e+08	5.0896e+08	4.46342e+08	5.43094e+08	6.55971e+08	1.06493	0.0907526	0.430186	0.527778	0.674717
Com_5609_neg	Toonacilin	C31 H38 O9	554.251	11.661	Full match	No results	No results	52196.5	151366	51298.1	49346.7	50829	49572.8	41296.6	67824	54450.4	32775.7	43677.2	39603.3	1.44696	0.533025	0.200711	0.722222	0.442572
Com_5628_neg	Hippuric acid	C9 H9 N O3	179.055	6.697	No results	Invalid mass	No results	245741	256386	263869	246838	247417	251693	180812	185858	139518	129206	243975	205430	1.39376	0.478978	0.0144296	1	0.54235
Com_564_neg	Ungeremine	C16 H12 N O3	266.081	7.424	Full match	No results	No results	1.15185e+06	1.78635e+06	1.84358e+06	2.00585e+06	1.63642e+06	1.41568e+06	3.79516e+06	3.00598e+06	2.15541e+06	1.84162e+06	5.195e+06	2.31094e+06	0.53757	-0.895476	0.0139017	0.944444	0.905875
Com_5677_neg	Sulopenem etzadroxil	C19 H27 N O7 S3	477.095	6.419	Full match	No results	No results	146504	156723	161065	144523	140606	140689	101219	105148	84276.5	69449.4	140773	110193	1.45667	0.542672	0.00888344	0.944444	0.603637
Com_571_neg	unnarmicin C	C38 H54 N4 O6	662.401	10.918	Full match	No results	No results	9.74315e+07	1.11254e+08	6.36228e+07	9.79172e+07	7.0363e+07	1.3873e+08	1.71825e+07	1.16768e+07	1.15124e+07	1.45845e+07	1.94133e+07	3.69175e+07	5.20563	2.38007	2.6158e-05	1	2.527
Com_5720_neg	CV5601000	C7 H6 N2 O3	166.037	7.059	Full match	No results	No results	256787	265530	149622	292751	588615	349930	89418.2	178252	137919	94969.6	331448	158396	1.92168	0.942365	0.0308842	0.833333	1.00298
Com_5761_neg	ALTERPERYLENOL	C20 H14 O6	350.079	10.968	Full match	No results	No results	91233.6	104419	99029.9	142740	87416.2	178159	65148.5	85511.2	74620.7	47891.8	280619	185960	0.950317	-0.0735192	0.707584	0.666667	0.416864
Com_5782_neg	5,6,7-Trimethoxy-2H-chromen-2-one	C12 H12 O5	236.07	11.812	Full match	No results	No results	215925	192045	165768	466014	173606	123249	129342	114983	106122	65202.1	195204	89963	1.90722	0.93147	0.0293438	0.861111	0.911223
Com_5800_neg	Dehydrorabelomycin	C19 H12 O5	320.069	11.041	Full match	No results	No results	104375	116307	112840	116352	100373	189321	85067.2	84719.2	65795.6	55684.2	108746	84100.7	1.52768	0.611339	0.0103306	0.944444	0.625167
Com_5803_neg	pemoline	C9 H8 N2 O2	176.059	8.122	Full match	No results	No results	280482	263149	328179	305929	296494	243999	146768	171022	82213.7	90830.3	234400	154091	1.95404	0.966456	0.00540121	1	1.10184
Com_5807_neg	2-(4-Chlorophenyl)-N'-[(2,4-dimethoxybenzoyl)oxy]ethanimidamide	C17 H17 Cl N2 O4	348.086	12.848	Full match	No results	No results	421441	273735	190892	161819	422819	269411	395405	120955	84033.7	156381	176690	250577	1.46964	0.555464	0.137749	0.805556	0.683299
Com_580_neg	Dodecanedioic acid	C12 H22 O4	230.151	9.485	No results	Invalid mass	No results	3.00561e+07	9.69867e+07	6.30553e+07	6.59407e+07	1.39141e+07	3.50685e+07	1.03443e+08	3.91397e+07	5.11021e+07	6.35792e+07	7.92117e+07	7.9166e+07	0.733857	-0.446429	0.208241	0.722222	0.675158
Com_5831_neg	(2E)-3-(6-Hydroxy-4-oxido-3-oxo-1,4-cyclohexadien-1-yl)acrylate	C9 H6 O5	194.023	6.626	Invalid mass	No results	No results	215776	210177	199766	216041	188877	202845	155244	177923	118058	140282	379878	151427	1.09857	0.13562	0.346503	0.833333	0.350065
Com_5846_neg	Idoxifene	C28 H30 I N O	523.136	7.014	Full match	No results	No results	161432	162824	170160	174102	152374	160397	100738	102503	81842.5	70914.1	140214	115207	1.60494	0.682516	0.00357057	1	0.744173
Com_584_neg	3-Hydroxyanthranilic acid	C7 H7 N O3	153.042	10.612	Partial match	Full match	No results	5.14876e+07	6.38229e+07	5.94456e+07	5.72535e+07	5.65474e+07	5.48296e+07	4.19265e+07	2.0931e+07	1.38648e+07	2.02512e+07	2.96874e+07	2.76345e+07	2.22551	1.15414	0.00232809	1	1.27343
Com_5855_neg	Arbutin	C12 H16 O7	272.088	6.179	Full match	No results	No results	217584	219891	267723	197729	233592	181925	136524	134338	106452	101590	172799	145065	1.65474	0.726605	0.00058016	1	0.768286
Com_5858_neg	Ceftazidime	C22 H22 N6 O7 S2	546.097	10.658	Full match	No results	No results	126892	227926	143403	135529	185513	199464	87051.2	81344	66674.2	60387.3	106637	89954.6	2.07038	1.04989	0.000239769	1	1.0705
Com_5859_neg	5,6-dihydroxy-2-indolecarboxylic acid	C9 H7 N O4	193.037	11.933	Full match	No results	No results	179861	317767	308988	170853	229283	348072	120359	112742	95914.8	83557.9	264583	127728	1.93174	0.9499	0.00774547	0.916667	1.03895
Com_5866_neg	3,4-dihydroxyphenylpyruvic acid	C9 H8 O5	196.038	2.755	Full match	No results	No results	177932	161354	151956	143462	145416	143543	169996	84305.8	245964	57070.6	218472	214578	0.932629	-0.100625	0.834146	0.638889	0.19454
Com_587_neg	sulfoacetaldehyde	C2 H4 O4 S	123.982	1.192	Invalid mass	No results	No results	3.31809e+07	4.40067e+07	3.52641e+07	4.08539e+07	4.18215e+07	4.91745e+07	3.92405e+07	5.11146e+07	2.70472e+07	2.46204e+07	6.63426e+07	4.35772e+07	0.969672	-0.0444317	0.912073	0.5	0.22524
Com_5889_neg	1-Vinyl-2-pyrrolidone	C6 H9 N O	111.068	5.685	Full match	No results	No results	445176	276288	229221	345171	216725	245063	191944	125053	190403	118842	218917	178102	1.71769	0.780471	0.00582236	0.972222	0.790267
Com_591_neg	Jasmonic acid	C12 H18 O3	210.125	9.417	Full match	No results	No results	9.80838e+06	4.24334e+07	3.67783e+07	1.37224e+07	1.81314e+07	2.42502e+07	9.99087e+07	4.91223e+07	3.04013e+07	4.29072e+07	2.8593e+07	2.78936e+07	0.520482	-0.94208	0.0542039	0.833333	0.992347
Com_5936_neg	Exo2	C18 H18 N4 O2 S	354.115	2.323	Full match	No results	No results	224928	226086	214217	187896	215562	208735	126740	117720	103771	86513.2	155347	133374	1.7657	0.820241	0.000529206	1	0.86766
Com_5993_neg	TH9185000	C8 H6 N2 O	146.048	10.369	Full match	No results	No results	90127.1	106134	164359	98792.2	92673.2	101042	77258.5	71337.7	57524.7	48505.5	93196.1	72816	1.55271	0.634785	0.00709261	0.944444	0.659675
Com_6001_neg	Chloramphenicol stearate	C29 H46 Cl2 N2 O6	588.276	11.952	Full match	No results	No results	89155.6	107429	117339	86736.9	90711.6	87855.8	82535.3	114799	46545.6	42002.1	232762	103588	0.930888	-0.10332	0.739299	0.416667	0.493656
Com_6022_neg	cercosporin	C29 H26 O10	534.154	7.52	Full match	No results	No results	92450.1	95400.2	101501	92519.3	85967.8	243759	98843.1	272432	47806.7	40009.1	173152	67541.8	1.01688	0.0241478	0.624246	0.583333	0.309853
Com_6032_neg	sivifene	C19 H14 N4 O6	394.091	8.887	Full match	No results	No results	103220	109566	108526	104607	97723.5	114781	65798.3	67565.6	55500.8	46105.5	91922.3	74809.3	1.5893	0.668389	0.00351853	1	0.724867
Com_6050_neg	Guvacine	C6 H9 N O2	127.063	6.531	Full match	No results	No results	164419	187485	235385	187655	321723	204342	109798	88843.2	85692.3	67079.9	178981	77381.2	2.14061	1.09802	0.00131961	0.972222	1.17526
Com_605_neg	7-deoxyloganin	C17 H26 O9	374.156	8.081	Full match	No results	No results	8.00223e+06	1.29654e+07	1.12143e+07	1.15464e+07	7.31034e+06	1.14112e+07	2.00658e+07	4.24604e+07	3.22661e+07	2.40543e+07	5.92628e+07	2.47489e+07	0.30785	-1.6997	0.000369518	1	1.69431
Com_6077_neg	Volkenin	C12 H17 N O7	287.099	10.475	Full match	No results	No results	154020	120817	128187	116710	109874	114358	69636.9	66015.1	56755.9	51882.1	91342.4	73915.3	1.81656	0.861205	0.000193443	1	0.903967
Com_608_neg	Bis(2-phenylpropyl)silane	C18 H24 Si	268.166	10.524	Full match	No results	No results	1.70859e+07	3.45487e+07	1.58994e+07	1.18392e+07	1.60609e+07	1.26169e+07	3.6321e+07	3.90914e+07	1.4562e+07	1.80658e+07	3.02428e+07	2.56487e+07	0.659123	-0.601381	0.0859236	0.805556	0.694892
Com_609_neg	DL-Mevalonic acid	C6 H12 O4	148.073	2.081	Full match	No results	No results	700249	6.03756e+06	1.17068e+07	8.28856e+06	4.32202e+06	1.09427e+07	6.26677e+06	6.71478e+06	4.83428e+06	4.19368e+06	5.99909e+06	7.0792e+06	1.19694	0.259345	0.820291	0.611111	0.159042
Com_6128_neg	Fumaric acid	C4 H4 O4	116.009	12.612	No results	Invalid mass	Invalid mass	89923.6	90380.2	90869.5	80818.3	83158.1	76954.5	55871.4	92144.5	111917	65592.1	76492.7	185963	0.870954	-0.199331	0.761545	0.5	0.13332
Com_613_neg	Reduced Glutathione	C10 H17 N3 O6 S	307.083	7.512	Full match	No results	No results	1.21495e+07	9.28197e+06	1.22703e+07	1.22179e+07	1.15808e+07	1.51556e+07	1.36366e+07	1.95258e+07	3.91479e+06	3.76971e+06	5.813e+06	7.7663e+06	1.33495	0.416783	0.149029	0.694444	0.699071
Com_620_neg	tectorigenin	C16 H12 O6	300.062	6.974	Partial match	No results	Full match	3.4061e+06	9.29067e+06	2.243e+07	4.13903e+07	9.85927e+06	3.55844e+07	1.06178e+07	8.79426e+06	7.05224e+06	4.11601e+06	9.56809e+06	9.45779e+06	2.45858	1.29783	0.180796	0.722222	0.929236
Com_624_neg	MFCD00468051	C17 H18 O7	334.104	8.489	Full match	No results	No results	1.159e+06	1.19506e+06	1.28376e+06	1.23644e+06	1.18952e+06	1.11977e+06	721418	722050	625889	509008	982834	780647	1.65449	0.726389	0.00174085	1	0.779941
Com_627_neg	4,6,8-trihydroxy-7-methoxy-3-methyl-3,4-dihydroisochromen-1-one	C11 H12 O6	240.066	14.673	No match	No results	Invalid mass	2.08613e+07	1.57405e+07	1.78792e+07	1.41516e+07	1.57229e+07	1.22454e+07	9.04129e+06	8.73855e+06	6.41848e+06	6.74851e+06	1.23057e+07	8.97825e+06	1.8495	0.887138	0.000538994	0.972222	0.935868
Com_631_neg	e-Tokoferol	C28 H42 O2	410.317	14.349	Full match	No results	No results	8.65713e+06	1.00211e+07	4.0182e+06	1.72887e+07	9.91391e+06	9.31167e+06	3.95195e+06	3.66525e+06	3.26313e+07	2.222e+06	2.16554e+07	6.98299e+06	0.832676	-0.264172	0.674064	0.638889	0.310956
Com_633_neg	3-sulfolactic acid	C3 H6 O6 S	169.988	1.182	Full match	No results	No results	2.43677e+07	3.04543e+07	2.2496e+07	2.99623e+07	2.57105e+07	4.11221e+07	3.15095e+07	4.29291e+07	1.94668e+07	1.95437e+07	5.51282e+07	3.81718e+07	0.842145	-0.247859	0.557666	0.611111	0.311797
Com_643_neg	aigialomycin F	C19 H26 O9	398.156	9.406	Full match	No results	No results	8.50344e+06	4.6385e+06	9.36596e+06	8.47437e+06	2.38986e+06	2.09622e+07	3.52387e+06	9.20892e+06	5.32302e+06	4.39396e+06	6.18948e+06	3.90247e+06	1.66968	0.739573	0.314976	0.694444	0.574217
Com_651_neg	Indican	C14 H17 N O6	295.104	8.07	Full match	No results	No results	1.40038e+07	3.03846e+07	2.50241e+07	2.47468e+07	1.11873e+07	5.46167e+07	1.64461e+07	4.17793e+07	2.68774e+07	1.2623e+07	1.72189e+07	1.92652e+07	1.19189	0.253248	0.681703	0.555556	0.302873
Com_654_neg	Bonducellpin D	C22 H28 O7	404.182	9.478	Full match	No results	No results	1.02484e+07	2.70667e+07	1.23234e+07	1.54989e+07	1.12923e+07	1.6658e+07	2.33942e+07	1.49761e+07	9.24516e+06	1.14375e+07	1.04968e+07	1.66716e+07	1.07964	0.110545	0.728924	0.555556	0.106301
Com_661_neg	Prunin	C21 H22 O10	434.12	11.566	Full match	No results	No results	1.25975e+06	2.69554e+07	1.00311e+07	1.74108e+07	1.79422e+06	3.3172e+07	1.70135e+07	5.51811e+07	1.20061e+07	1.08283e+07	5.05384e+06	1.9008e+07	0.76096	-0.394108	0.399616	0.583333	0.950889
Com_663_neg	Falcarindiol	C17 H24 O2	260.178	11.206	Full match	No results	No results	2.32425e+07	8.93588e+07	6.99778e+07	4.09191e+07	2.44109e+07	3.27498e+07	6.18551e+07	2.07087e+07	4.01197e+07	5.76337e+07	9.26621e+07	7.15859e+07	0.81453	-0.29596	0.466433	0.611111	0.437033
Com_669_neg	FLUMEZAPINE	C17 H19 F N4 S	330.13	8.023	Full match	No results	No results	7.57498e+06	1.09638e+07	1.15009e+07	1.31255e+07	9.60062e+06	8.61456e+06	9.27538e+06	9.03778e+06	6.87295e+06	4.95478e+06	1.03225e+07	8.01873e+06	1.26604	0.340324	0.102317	0.777778	0.388076
Com_66_neg	afzelin	C21 H20 O10	432.104	10.084	Partial match	No results	Full match	6.34629e+07	1.05323e+08	9.58235e+07	1.23263e+08	1.41396e+08	1.09261e+08	1.3454e+08	1.58658e+08	2.16131e+08	1.33332e+08	1.26831e+08	9.12054e+07	0.741874	-0.430754	0.0978237	0.777778	0.459774
Com_671_neg	Mitobronitol	C6 H12 Br2 O4	305.911	1.878	Full match	No results	No results	1.13888e+07	1.09711e+07	1.33091e+07	1.28766e+07	1.75441e+07	1.08162e+07	4.24271e+06	3.6689e+06	3.00863e+06	3.53651e+06	5.14561e+06	4.26439e+06	3.22231	1.68809	6.49862e-07	1	1.73492
Com_679_neg	hesperetin 7-O-beta-D-glucoside	C22 H24 O11	464.13	8.071	Full match	No results	No results	1.09523e+06	2.43945e+07	3.09512e+07	2.44e+07	2.91642e+07	7.32867e+06	5.77865e+07	5.96598e+07	5.25167e+07	3.95406e+07	4.56835e+07	1.68124e+06	0.456786	-1.13041	0.326645	0.861111	1.24533
Com_67_neg	Biacetyl	C4 H6 O2	86.0365	1.418	Full match	No results	No results	9.07386e+08	9.98051e+08	1.1178e+09	1.15945e+09	9.69538e+08	3.886e+08	3.31389e+08	7.15244e+08	6.14537e+08	3.86829e+08	4.73716e+08	7.37231e+08	1.70019	0.765694	0.0369491	0.888889	0.775557
Com_68_neg	1-(1H-Indol-3-ylcarbonyl)-9H-beta-carboline-3-carboxylic acid	C21 H13 N3 O3	355.097	3.6	Full match	No results	No results	1.152e+08	1.70225e+08	1.73227e+08	1.46584e+08	8.63303e+07	2.68406e+08	1.56933e+09	2.2287e+09	1.5364e+09	1.25863e+09	1778854380	1.08956e+09	0.101461	-3.301	9.40971e-07	1	3.4557
Com_700_neg	Sancycline	C21 H22 N2 O7	414.141	7.369	Full match	No results	No results	1.61609e+06	2.51533e+06	1.53476e+06	1.88224e+06	1.01618e+06	3.34561e+06	2.20622e+06	2.14601e+06	724250	2.65951e+06	898203	2.12934e+06	1.10653	0.146047	0.633231	0.472222	0.253899
Com_703_neg	bruceine D	C20 H26 O9	410.156	8.437	Full match	No results	No results	9.0437e+06	1.91725e+07	2.1302e+07	2.40369e+07	1.23859e+07	1.74187e+07	3.88528e+07	4.33992e+07	2.07142e+07	1.69767e+07	3.73799e+07	2.77867e+07	0.558371	-0.840705	0.0228119	0.833333	0.892536
Com_710_neg	(3R,4S,5R)-5-Methoxy-6,6-dimethyltetrahydro-2H-pyran-2,3,4-triol	C8 H16 O5	192.099	1.374	Full match	No results	No results	1.12677e+07	1.11728e+07	1.62907e+07	1.66142e+07	8.42123e+06	9.93651e+06	6.86837e+06	6.70178e+06	4.79453e+06	3.85851e+06	1.31955e+07	7.17779e+06	1.73026	0.790991	0.0181192	0.888889	0.914415
Com_713_neg	N-[3,5-Bis(sulfanylmethyl)benzyl]asparagine	C13 H18 N2 O3 S2	314.077	11.75	Full match	No results	No results	598951	620454	1.02672e+06	3.78455e+07	811024	809706	365702	569060	4.88536e+07	657051	499777	436311	0.811817	-0.300774	0.764132	0.777778	1.11667
Com_722_neg	Patrinoside	C21 H34 O11	462.208	8.299	Full match	No results	No results	7.18855e+07	2.3957e+07	3.33932e+07	6.07353e+07	4.19564e+07	5.27033e+07	5.06453e+07	5.72385e+07	4.68202e+07	3.65098e+07	5.90157e+07	5.1147e+07	0.944436	-0.082475	0.560973	0.527778	0.195535
Com_723_neg	Ethyl maltol	C7 H8 O3	140.047	7.942	Full match	No results	No results	3.82529e+06	5.78317e+06	3.98296e+06	6.05156e+06	3.6359e+06	4.82774e+06	2.31305e+06	3.17173e+06	2.41012e+06	1.75388e+06	3.42159e+06	2.88444e+06	1.76164	0.816918	0.00174047	1	0.845688
Com_736_neg	TI1940000	C14 H18 O4	250.119	9.247	Invalid mass	No results	No results	6.43636e+06	1.33946e+07	4.46868e+06	3.4956e+06	5.37691e+06	5.53284e+06	2.48471e+07	1.35196e+07	6.65481e+06	7.5296e+06	6.97515e+06	6.60846e+06	0.585245	-0.772887	0.118674	0.888889	0.733094
Com_739_neg	(+)-varitriol	C15 H20 O5	280.13	7.818	Full match	No results	No results	4.29015e+06	8.10326e+06	8.91725e+06	6.06149e+06	5.49654e+06	9.62632e+06	6.6769e+06	5.04182e+06	5.87709e+06	5.31866e+06	6.36308e+06	5.87433e+06	1.2089	0.273692	0.296978	0.666667	0.23861
Com_747_neg	(+)-Aspicilin	C18 H32 O5	328.224	10.746	Full match	No results	No results	9.8553e+06	2.58064e+07	2.17399e+07	1.51035e+07	1.09946e+07	1.89816e+07	2.54364e+07	1.63518e+07	1.37571e+07	1.83939e+07	1.96691e+07	2.16639e+07	0.889036	-0.169686	0.404892	0.583333	0.243054
Com_748_neg	prifelone	C19 H24 O2 S	316.151	1.441	Full match	No results	No results	1.06112e+07	1.08023e+07	1.04655e+07	1.05313e+07	1.04664e+07	1.36451e+07	9.496e+06	8.17771e+06	6.33793e+06	5.48587e+06	1.11735e+07	8.60725e+06	1.34992	0.432877	0.0282144	0.861111	0.488345
Com_756_neg	5-amino-6-(5-phospho-D-ribitylamino)uracil	C9 H17 N4 O9 P	356.073	5.859	Full match	No results	No results	889709	911256	886033	777618	767997	798903	733360	701028	516091	439221	889557	655928	1.2786	0.354562	0.0481926	0.888889	0.422554
Com_757_neg	S-benzyl phenylmethanethiosulfinate	C14 H14 O S2	262.05	7.451	Full match	No results	No results	1.70873e+06	1.38211e+06	1.62687e+06	2.24286e+06	1.05971e+06	3.21772e+06	2.91041e+06	3.28952e+06	2.78371e+06	2.54179e+06	4.22791e+06	3.03756e+06	0.598055	-0.741649	0.0139056	0.888889	0.842734
Com_767_neg	streptidine	C8 H18 N6 O4	262.14	8.036	Full match	No results	No results	1.93003e+06	1.27824e+06	876675	705497	536114	1.65957e+06	920645	708122	311050	375208	1.54893e+06	633170	1.55346	0.63549	0.157355	0.722222	0.761441
Com_768_neg	Butyl 2-{4-[4-(difluoromethyl)-2-fluorophenoxy]phenoxy}propanoate	C20 H21 F3 O4	382.138	9.067	Full match	No results	No results	2.44465e+07	4.47032e+07	4.65208e+07	1.81556e+07	3.38312e+07	3.18866e+07	1.93328e+07	4.35787e+07	2.57321e+07	1.65634e+07	4.27981e+07	4.05224e+07	1.05843	0.0819308	0.739615	0.416667	0.252071
Com_769_neg	3-[3-(4-Fluorophenyl)propyl]-1,1,1,3,5,5,5-heptamethyltrisiloxane	C16 H31 F O2 Si3	358.161	8.346	Full match	No results	No results	2.01602e+07	2.12204e+07	1.65495e+07	1.57302e+07	1.44947e+07	1.73867e+07	1.3793e+07	1.53928e+07	1.49027e+07	1.34256e+07	2.0117e+07	1.55915e+07	1.13215	0.179061	0.169256	0.805556	0.1942
Com_774_neg	casearin U	C28 H42 O8	506.286	12.879	Full match	No results	No results	1.85983e+06	5.67084e+06	3.69178e+06	4.89779e+06	4.62347e+06	5.25872e+06	4.8819e+06	5.11935e+06	1.96161e+06	3.36476e+06	8.97875e+06	7.37262e+06	0.82081	-0.28488	0.622245	0.583333	0.43689
Com_77_neg	D-(+)-Galactose	C6 H12 O6	226.068	1.502	No match	Invalid mass	No results	1.27705e+08	3.25858e+08	2.16025e+08	2.18425e+08	1.864e+08	2.70901e+08	2.63202e+08	2.35652e+08	1.18132e+07	1.64516e+08	2.1409e+08	2.49737e+08	1.18113	0.240163	0.408812	0.416667	0.853898
Com_791_neg	Alatrofloxacin	C26 H25 F3 N6 O5	558.186	10.088	Full match	No results	No results	2.64264e+07	4.74747e+07	6.08266e+07	7.76698e+07	3.13836e+07	8.08705e+07	1.61169e+07	1.56148e+07	1.58873e+07	9.00281e+06	3.18445e+07	3.6112e+07	2.606	1.38184	0.00622745	0.888889	1.4601
Com_795_neg	17beta-(Acetylthio)estra-1,3,5(10)-trien-3-ol acetate	C22 H28 O3 S	372.177	8.483	Full match	No results	No results	1.12488e+07	8.17843e+06	4.36533e+06	4.06298e+07	5.26646e+06	3.95147e+06	2.30834e+07	3.80922e+07	3.49055e+07	1.78744e+07	3.51e+07	2.87415e+07	0.414182	-1.27166	0.0161665	0.833333	1.86308
Com_797_neg	Lofepramine	C26 H27 Cl N2 O	418.182	8.364	Full match	No results	No results	4.47859e+07	3.92663e+07	3.80872e+07	3.95458e+07	3.4766e+07	4.14207e+07	3.28427e+07	3.09097e+07	2.65111e+07	2.52589e+07	5.0184e+07	3.32351e+07	1.19569	0.257842	0.101656	0.833333	0.329933
Com_798_neg	Dimedone	C8 H12 O2	140.083	8.725	Full match	No results	No results	3.25969e+06	4.60378e+06	8.06153e+06	1.43226e+07	2.03947e+06	1.3234e+07	4.99856e+06	2.98139e+06	1.61884e+06	1.56135e+06	1.04867e+07	9.45968e+06	1.46339	0.549316	0.389886	0.666667	0.760158
Com_7_neg	Chlorogenic acid	C16 H18 O9	354.094	3.544	Full match	Full match	Full match	6.98062e+08	9.93011e+08	1.03855e+09	8.49393e+08	5.34737e+08	1.67853e+09	8.18384e+09	1.03162e+10	7.90912e+09	7.36049e+09	1.22343e+10	8.37632e+09	0.106515	-3.23088	2.74528e-06	1	3.41168
Com_812_neg	Dibenzo-18-crown-6	C20 H24 O6	360.156	9.822	Full match	No results	No results	9.91902e+06	1.48254e+07	1.0714e+07	1.09144e+07	8.40113e+06	1.02495e+07	1.26509e+07	8.98178e+06	5.86647e+06	6.68309e+06	8.81136e+06	1.16131e+07	1.19076	0.251884	0.208311	0.666667	0.314868
Com_816_neg	MFCD00273002	C33 H56 O6	548.41	0.529	Full match	No results	No results	2.94354e+07	9.90252e+06	1.03179e+07	3.14527e+07	1.15541e+07	1.20796e+07	8.91402e+06	8.4021e+06	6.31168e+06	8.44628e+06	1.26845e+07	8.49301e+06	1.96693	0.975947	0.0480156	0.888889	0.853633
Com_818_neg	DEHYDROASCORBIC ACID	C6 H6 O6	174.016	1.124	Full match	No results	No results	6.39291e+06	8.18393e+06	8.53549e+06	1.02704e+07	6.41168e+06	9.99668e+06	1.1908e+07	1.26311e+07	7.94715e+06	7.04649e+06	1.50215e+07	1.07051e+07	0.762973	-0.390296	0.112312	0.777778	0.421108
Com_822_neg	glutaral	C5 H8 O2	100.052	6.81	Full match	No results	No results	5.70095e+06	9.10583e+06	4.25107e+06	4.03839e+06	5.35605e+06	6.39731e+06	2.91271e+07	1.73666e+07	1.13891e+07	8.02081e+06	1.27518e+07	1.32981e+07	0.378992	-1.39976	0.0020846	0.972222	1.38369
Com_823_neg	Dimethyl 1,4-cyclohexanedicarboxylate	C10 H16 O4	200.104	6.812	Full match	No results	No results	4.71346e+06	7.52856e+06	3.51472e+06	3.33888e+06	4.4283e+06	5.28919e+06	2.40818e+07	1.73666e+07	9.4163e+06	6.63148e+06	1.0543e+07	1.09947e+07	0.364567	-1.45574	0.00230178	0.972222	1.43071
Com_825_neg	3-Methylbutanoic acid	C5 H10 O2	102.068	1.959	Full match	No results	No results	3.04963e+06	3.3612e+06	3.72255e+06	2.42669e+06	2.23079e+06	3.36335e+06	2.36523e+06	2.29273e+06	1.63112e+06	1.25629e+06	2.03958e+06	2.53265e+06	1.49817	0.583199	0.0136901	0.888889	0.618979
Com_836_neg	6-[(2R,5S,6S)-5-Hydroxy-6-methyl-2-piperidinyl]hexanoic acid	C12 H23 N O3	229.167	9.897	Invalid mass	No results	No results	1.11349e+07	9.84448e+06	8.3139e+06	7.63433e+06	9.86523e+06	7.27522e+06	1.76435e+07	7.06482e+06	9.10298e+06	5.98487e+06	1.07859e+07	1.22294e+07	0.8608	-0.216251	0.591906	0.555556	0.239636
Com_83_neg	Aurantio-obtusin beta-D-glucoside	C23 H24 O12	492.125	10.104	Full match	No results	No results	1.29358e+06	1.46225e+06	1.40333e+06	1.62195e+06	1.25209e+06	2.31069e+06	1.21865e+06	1.40709e+06	3.09117e+06	1.57862e+06	1.61897e+06	1.20643e+06	0.923224	-0.115247	0.794996	0.472222	0.255723
Com_840_neg	Tivozanib	C22 H19 Cl N4 O5	454.104	7.855	Full match	No results	No results	3.51586e+06	1.60617e+07	9.20879e+06	1.15302e+07	3.58851e+06	2.79226e+07	9.5852e+06	1.39136e+07	3.86711e+06	5.57496e+06	8.99602e+06	1.53531e+07	1.25376	0.326256	0.867238	0.527778	0.114512
Com_847_neg	Dimethyl (2-oxopropyl)malonate	C8 H12 O5	188.068	0.977	Full match	No results	No results	5.76479e+07	4.55335e+07	5.90062e+07	6.74794e+07	5.41254e+07	5.61058e+07	3.81031e+07	3.13342e+07	2.31845e+07	2.77172e+07	4.09556e+07	3.52801e+07	1.7291	0.790025	0.000511182	1	0.832413
Com_855_neg	2-Methoxy-5-nitrophenol	C7 H7 N O4	169.037	7.421	Full match	No results	No results	4.75637e+06	9.59894e+06	5.18196e+06	5.71471e+06	5.89622e+06	6.20601e+06	1.6176e+07	4.30718e+06	2.4732e+06	3.83651e+06	4.60708e+06	6.00703e+06	0.99859	-0.00203553	0.569866	0.722222	0.277005
Com_85_neg	Oxazolam	C18 H17 Cl N2 O2	328.099	1.382	Full match	No results	No results	1.37076e+09	1.67777e+09	1.85343e+09	1.84374e+09	1.87453e+09	4.43883e+08	1.86639e+07	2.01198e+08	2.52741e+07	7.53611e+08	3.64308e+08	1.3112e+09	3.38939	1.76103	0.0361463	0.944444	3.05741
Com_867_neg	Fusicoccin H	C26 H42 O8	482.286	12.954	Full match	No results	No results	8.26216e+06	1.55149e+07	9.39121e+06	1.33079e+07	2.47247e+07	1.97396e+07	4.53517e+06	5.64861e+06	1.3044e+07	6.94031e+06	3.19056e+07	8.22545e+06	1.29362	0.371415	0.240528	0.777778	0.637305
Com_879_neg	2-(Diethoxymethyl)furan	C9 H14 O3	170.094	9.563	Full match	No results	No results	4.61509e+07	3.45376e+07	2.86559e+07	3.07807e+07	3.77234e+07	2.35065e+07	1.17097e+07	1.44154e+07	6.66026e+06	6.85071e+06	1.83662e+07	1.2867e+07	2.84121	1.50651	0.000495844	1	1.62575
Com_880_neg	(+)-lyoniresinol	C22 H28 O8	420.177	8.656	Full match	No results	No results	798149	7.2519e+06	7.63471e+06	2.10871e+07	2.61083e+06	1.9352e+07	1.32133e+07	1.58172e+07	1.53125e+07	7.73911e+06	1.97276e+07	1.47983e+07	0.678167	-0.560287	0.165072	0.694444	1.24425
Com_881_neg	Methyl cinnamate	C10 H10 O2	162.067	9.44	Full match	No results	No results	4.96242e+06	5.24234e+06	4.83102e+06	5.57956e+06	3.97441e+06	5.6851e+06	5.35395e+06	6.53569e+06	4.11188e+06	3.89013e+06	5.28307e+06	4.04732e+06	1.03603	0.0510634	0.650954	0.555556	0.071258
Com_886_neg	2-(6-Amino-3-imino-3H-xanthen-9-yl)benzoic acid	C20 H14 N2 O3	330.102	1.463	Full match	No results	No results	7.38293e+06	6.0287e+06	6.40904e+06	5.77471e+06	7.20848e+06	6.7934e+06	5.96611e+06	4.73683e+06	4.34264e+06	3.50067e+06	7.08904e+06	5.35207e+06	1.27785	0.353721	0.0466306	0.861111	0.414927
Com_888_neg	Indene	C9 H8	116.062	9.437	Full match	No results	No results	1.4577e+06	2.3201e+06	1.11029e+06	2.71249e+06	1.46612e+06	3.07216e+06	1.51444e+06	1.54892e+06	1.38331e+06	1.0458e+06	2.04229e+06	1.75651e+06	1.30648	0.385688	0.278208	0.638889	0.327915
Com_899_neg	guaiapate	C18 H29 N O4	323.208	11.393	Full match	No results	No results	568399	8.40782e+06	6.04446e+06	1.93077e+06	2.81622e+06	4.23881e+06	4.55661e+07	3.12998e+07	8.05514e+06	1.03132e+07	2.62931e+06	3.09227e+06	0.237792	-2.07223	0.0790363	0.777778	1.83844
Com_8_neg	Threose, D-	C4 H8 O4	120.042	1.433	Full match	No results	No results	6.21533e+08	1.05069e+09	3.19469e+09	1.35858e+09	1.09207e+09	1.16797e+09	7.64441e+08	8.96195e+08	3.57961e+08	6.80421e+08	4.36148e+08	6.05497e+08	2.26846	1.18171	0.0208946	0.916667	1.09215
Com_901_neg	2-{[(2,6-Diisopropylphenyl)sulfanyl]methyl}tetrahydrofuran	C17 H26 O S	278.172	10.367	Full match	No results	No results	1.50065e+07	1.14563e+07	1.31398e+07	1.3224e+07	2.13209e+07	1.31617e+07	4.28188e+07	2.89092e+07	1.99225e+07	1.04507e+07	3.47932e+07	2.08712e+07	0.553411	-0.853576	0.0539752	0.777778	0.831954
Com_904_neg	Paeonilactone C	C17 H18 O6	318.109	8.6	Full match	No results	No results	6.30935e+06	1.2741e+07	6.1366e+06	6.49367e+06	3.7118e+06	5.77061e+06	1.80813e+07	5.87914e+06	4.2603e+06	5.43933e+06	3.90446e+06	6.71049e+06	0.929712	-0.105144	0.971471	0.555556	0.0264789
Com_910_neg	Neoandrographolide 劤누懃젭코焦	C26 H40 O8	480.271	11.758	Partial match	No results	Full match	2.17788e+06	5.96762e+06	3.03408e+06	4.92889e+06	3.66428e+06	3.92067e+06	2.24488e+06	451325	5.17773e+06	2.8117e+06	1.35255e+07	5.0422e+06	0.80994	-0.304112	0.739006	0.5	0.353943
Com_91_neg	1-O-[(2-Oxo-2,3-dihydro-1H-indol-3-yl)acetyl]-beta-D-glucopyranose	C16 H19 N O8	353.11	7.597	Full match	No results	No results	4.23162e+07	4.826e+08	2.64031e+08	2.72454e+08	4.31423e+07	6.58214e+08	2.432e+08	5.9717e+08	1.95341e+08	9.78905e+07	1.19762e+08	3.3837e+08	1.10745	0.147235	0.774514	0.527778	0.334626
Com_923_neg	(1S)-1,5-Anhydro-1-benzyl-D-galactitol	C13 H18 O5	254.115	9.896	Full match	No results	No results	532134	466908	656814	491313	537802	659219	415532	555243	447205	309228	532624	646809	1.15053	0.202304	0.229778	0.694444	0.254899
Com_935_neg	nhatrangin A	C21 H32 O8	412.208	9.306	Full match	No results	No results	1.42367e+06	1.55512e+06	2.31657e+06	3.27455e+06	1.77662e+06	3.67346e+06	2.40729e+06	2.17495e+06	1.39309e+06	1.77823e+06	2.6336e+06	1.61087e+06	1.16852	0.224687	0.561615	0.555556	0.170395
Com_965_neg	3,5-Dinitro-2-hydroxybenzoic acid	C7 H4 N2 O7	228.003	1.519	Full match	No results	No results	3.96588e+06	3.3728e+06	3.44105e+06	3.47688e+06	3.36085e+06	3.73518e+06	2.75154e+06	2.61081e+06	2.28963e+06	1.78211e+06	3.96088e+06	3.08843e+06	1.2954	0.373401	0.0475725	0.861111	0.45042
Com_966_neg	2-(4-Hydroxyphenyl)-5,6,7,8-tetramethoxy-2,3-dihydro-4H-chromen-4-one	C19 H20 O7	360.119	9.868	Full match	No results	No results	3.3952e+06	7.95906e+06	6.03529e+06	9.12367e+06	2.35722e+06	1.71016e+07	6.24652e+06	6.07204e+06	3.35489e+06	5.05618e+06	6.36158e+06	6.20162e+06	1.38084	0.465544	0.657825	0.583333	0.227332
Com_971_neg	Monoxerutin	C29 H34 O17	654.178	9.613	Full match	No results	No results	1.60349e+06	4.99771e+06	5.01806e+06	6.41786e+06	3.68771e+06	7.20599e+06	2.60732e+06	4.2956e+06	5.53798e+06	1.88267e+06	2.02385e+06	1.59233e+06	1.61267	0.689448	0.137731	0.75	0.844342
Com_977_neg	Carmine	C22 H20 O13	492.089	9.015	Full match	No results	No results	1.79913e+06	5.94557e+06	3.58188e+06	3.31615e+06	2.67296e+06	4.82608e+06	1.33551e+06	2.71009e+06	2.47315e+06	2.04191e+06	1.55323e+06	2.38252e+06	1.77185	0.825259	0.0317419	0.861111	0.829557
Com_985_neg	(9Z,11E,13S,15Z)-13-Hydroperoxy-9,11,15-octadecatrienoic acid	C18 H30 O4	310.213	12.428	Full match	No results	No results	9.75322e+06	1.15882e+07	1.06925e+07	1.53538e+07	1.20084e+07	1.3776e+07	4.83074e+06	8.46055e+06	3.003e+06	2.95032e+06	6.56988e+06	5.39587e+06	2.34448	1.22927	0.00208343	1	1.35549
Com_998_neg	1-oleoyl-sn-glycero-3-phosphoethanolamine	C23 H46 N O7 P	479.299	14.863	Full match	No results	No results	1.98396e+06	1.42559e+07	1.5646e+07	3.20267e+07	2.78085e+06	3.3195e+07	1.36065e+07	1.0963e+07	9.94228e+06	3.79741e+06	1.00779e+07	1.43356e+07	1.59254	0.67133	0.886439	0.638889	0.156171
Com_9_neg	┒,┒-Trehalose	C12 H22 O11	342.115	1.391	Not the top hit	Full match	Not the top hit	1.30872e+09	1.84194e+09	2.13309e+09	3.46505e+09	1.89334e+09	1.15036e+09	1.65918e+08	4.73519e+08	1.50412e+08	6.72833e+08	6.49744e+08	1.24285e+09	3.51461	1.81337	0.00623673	0.972222	2.16695

## Sheet: A6vsC6
ID	Name_des	Formula	Molecular Weight	RT [min]	ChemSpider_Results	mzCloud_Results	mzVault_Results	neg_A61	neg_A62	neg_A63	neg_A64	neg_A65	neg_A66	neg_C61	neg_C62	neg_C63	neg_C64	neg_C65	neg_C66	FC	log2FC	Pvalue	ROC	VIP
Com_1010_neg	guajavarin	C20 H18 O11	434.084	7.945	Partial match	No results	Full match	2.60823e+06	5.72536e+06	2.84543e+06	3.43075e+06	4.20816e+06	3.91531e+06	6.4806e+06	4.76435e+06	3.30888e+06	2.37555e+06	4.37432e+06	3.33332e+06	0.922727	-0.116024	0.733061	0.555556	0.25049
Com_1013_neg	MUCIC ACID	C6 H10 O8	210.036	1.387	No results	No results	Invalid mass	1.66581e+07	6.60387e+06	1.37223e+07	8.645e+06	1.10055e+07	8.53971e+06	2.24129e+07	2.6149e+07	2.83822e+07	1.1675e+07	1.76844e+07	2.62511e+07	0.49168	-1.02421	0.00437727	0.944444	1.02949
Com_1016_neg	2-Methyl-2-propanyl benzyl(4,5-dichlorohexyl)carbamate	C18 H27 Cl2 N O2	359.143	9.455	Full match	No results	No results	4.91032e+06	3.23792e+06	3.86994e+06	4.73802e+06	5.17702e+06	8.63802e+06	3.12442e+06	4.98565e+06	6.19006e+06	1.89586e+06	4.87025e+06	4.93823e+06	1.17561	0.233415	0.4368	0.444444	0.344216
Com_1022_neg	Pinocembrin 漑橄羹	C15 H12 O4	256.072	11.91	No results	No results	Invalid mass	2.30562e+06	2.26452e+06	678570	828048	804551	1.14076e+06	581613	876063	456236	187226	486918	833278	2.34472	1.22942	0.0247856	0.833333	1.16245
Com_1030_neg	Diethyl [1-(benzyloxy)-5-hydroxy-2-oxo-3-pyrrolidinyl]phosphonate	C15 H22 N O6 P	343.119	7.953	Full match	No results	No results	4.6023e+06	3.66606e+06	2.02264e+06	1.07939e+07	1.24457e+06	1.18269e+06	1.02591e+06	1.16022e+06	6.53045e+06	2.60051e+06	9.52764e+06	1.05969e+07	0.747803	-0.419269	0.696696	0.5	0.343947
Com_1032_neg	Myxochlin A	C20 H26 N2 O7	406.174	10.085	Full match	No results	No results	1.11323e+07	9.7736e+06	9.17988e+06	1.43189e+07	1.31614e+07	7.61178e+06	7.58425e+06	1.15867e+07	1.69863e+07	7.92562e+06	2.05933e+07	3.12143e+07	0.679712	-0.557005	0.299988	0.638889	0.406183
Com_1038_neg	Etoglucid	C12 H22 O6	262.141	9.714	Full match	No results	No results	2.2089e+06	1.1861e+06	1.06557e+06	2.38754e+06	1.64839e+06	1.67827e+06	1.1114e+06	1.25423e+06	1.15924e+06	461478	1.37287e+06	1.59697e+06	1.46269	0.548629	0.101967	0.777778	0.585744
Com_103_neg	┒-Lactose	C12 H22 O11	388.12	1.391	No match	Invalid mass	Invalid mass	6.23805e+07	2.01935e+08	1.09476e+08	1.59855e+09	1.47679e+09	1.48859e+07	1.16322e+08	7.78445e+07	8.65037e+07	4.99922e+07	2.1866e+08	3.40761e+07	5.93766	2.56989	0.322569	0.638889	1.18271
Com_1041_neg	Ceftolozane	C23 H30 N12 O8 S2	666.177	7.615	Full match	No results	No results	9.63926e+06	1.03466e+07	3.88027e+06	4.38899e+06	8.45492e+06	9.44464e+06	1.3438e+07	1.67996e+07	9.0999e+06	2.51105e+06	3.12699e+07	4.92599e+06	0.59139	-0.757817	0.493655	0.638889	0.642715
Com_1064_neg	Syringetin	C17 H14 O8	346.068	9.043	Full match	No results	No results	542492	610965	443247	840301	651385	640407	615167	693762	627601	260099	577249	704098	1.07212	0.100462	0.587589	0.5	0.292005
Com_1076_neg	longipedumin A	C31 H32 O8	532.209	10.237	Full match	No results	No results	5.1219e+06	7.3566e+06	1.35226e+06	3.19841e+06	3.82383e+06	1.25096e+06	2.58863e+07	1.38896e+07	1.30412e+07	8.49146e+06	2.38983e+07	1.8495e+07	0.213149	-2.23006	0.00110379	1	2.34617
Com_1081_neg	Salicin 6-phosphate	C13 H19 O10 P	366.07	7.025	Full match	No results	No results	7.48441e+06	4.48241e+06	2.60839e+06	5.25971e+06	5.01112e+06	6.51771e+06	2.5474e+07	1.93531e+07	1.55062e+07	1.14105e+07	2.40868e+07	2.59074e+07	0.257633	-1.95661	4.98339e-05	1	1.92684
Com_1082_neg	sinapoyltartronic acid	C14 H14 O9	326.062	6.578	Full match	No results	No results	528848	651370	487328	710625	743368	734883	523645	586187	571233	275588	631553	599194	1.2099	0.274882	0.186833	0.75	0.346404
Com_1083_neg	Reduced-(S)-usnate	C18 H18 O7	346.104	7.532	Full match	No results	No results	4.1214e+06	6.88244e+06	3.14668e+06	4.99312e+06	8.97319e+06	9.14779e+06	5.19267e+06	6.78096e+06	4.08666e+06	1.09236e+06	3.29927e+06	1.2054e+07	1.1464	0.197106	0.454727	0.611111	0.607441
Com_1094_neg	Bipinnatin K	C23 H26 O9	446.156	10.977	Full match	No results	No results	4.23393e+06	3.25645e+06	2.70053e+06	4.66748e+06	3.67561e+06	3.3292e+06	3.01416e+06	4.06093e+06	6.74517e+06	1.46479e+06	7.83223e+06	9.70508e+06	0.666107	-0.586174	0.447008	0.638889	0.46046
Com_109_neg	Ornithine	C5 H12 N2 O2	132.089	1.433	Full match	Full match	No results	3.41344e+07	2.55297e+08	6.69742e+07	1.23713e+08	2.41497e+08	1.81866e+08	5.4496e+07	3.66508e+07	3.33481e+07	1.13995e+07	6.23325e+07	8.12455e+07	3.23282	1.69279	0.0268972	0.861111	1.56764
Com_10_neg	Caffeic acid 3-glucoside	C15 H18 O9	342.094	2.471	Full match	No results	No results	1.1894e+09	2.22735e+09	8.72393e+08	1.82375e+09	1.66656e+09	1.09321e+09	5.68792e+09	2.62494e+09	5.6579e+09	2.75521e+09	1.13454e+10	6.24399e+09	0.258562	-1.95142	0.00117157	1	1.79826
Com_1106_neg	5-[(6-O-Benzoyl-D-erythro-hexopyranosyl)oxy]-2-hydroxybenzoic acid	C20 H20 O10	420.104	8.088	Full match	No results	No results	4.04051e+06	2.9412e+06	1.73681e+06	3.27051e+06	2.77858e+06	2.79815e+06	3.05755e+06	5.99573e+06	3.57173e+06	1.75482e+06	4.48617e+06	1.99785e+06	0.841924	-0.248238	0.627926	0.638889	0.299918
Com_1107_neg	Kynurenic acid	C10 H7 N O3	189.042	8.533	Full match	No results	No results	1.53404e+06	822949	640715	916514	1.54701e+06	1.59076e+06	656189	777192	1.28285e+06	289738	695185	996032	1.50132	0.586236	0.126564	0.75	0.648166
Com_1113_neg	3-(2,6-dihydroxyphenyl)-4-hydroxy-6-methyl-3H-2-benzofuran-1-one	C15 H12 O5	272.067	10.191	No results	No results	Invalid mass	2.67355e+07	1.24075e+07	7.07395e+06	8.73606e+06	1.05886e+07	1.06748e+07	3.65822e+06	6.73483e+06	5.06794e+06	1.32658e+06	7.69593e+06	1.51799e+07	1.92158	0.942293	0.0715961	0.833333	1.11044
Com_112_neg	glicetanile	C23 H25 Cl N4 O4 S	488.13	8.63	Full match	No results	No results	1.9521e+08	1.44581e+08	3.41514e+07	6.73929e+07	1.44865e+08	2.5767e+07	7.17848e+07	2.68222e+08	2.22689e+08	4.43836e+07	4.0399e+08	1.84222e+08	0.511982	-0.965834	0.192826	0.777778	1.0208
Com_1132_neg	adenosine 5'-(hexanoyl phosphate)	C16 H24 N5 O8 P	445.136	8.903	Full match	No results	No results	6.11461e+06	3.61555e+06	1.14105e+06	3.31856e+06	2.85122e+06	1.22109e+06	1.46797e+06	7.93694e+06	1.0049e+07	3.58746e+06	1.16667e+07	1.23068e+07	0.388432	-1.36427	0.0703275	0.833333	1.24023
Com_1137_neg	6-Nitro-N-phenyl-4-quinazolinamine	C14 H10 N4 O2	266.081	6.331	Full match	No results	No results	1.26258e+06	1.99525e+06	931708	1.35643e+06	2.00912e+06	1.56649e+06	3.02321e+06	1.67373e+06	2.34353e+06	902035	3.38405e+06	5.73558e+06	0.534609	-0.903443	0.120113	0.777778	0.780938
Com_1152_neg	chaetomugilin G	C24 H29 Cl O7	464.161	9.212	Full match	No results	No results	2.08942e+06	1.29698e+06	1.86306e+06	5.42677e+06	2.71584e+06	2.77317e+06	2.53476e+06	2.16852e+06	4.45999e+06	1.68707e+06	5.71159e+06	7.93593e+06	0.659863	-0.59976	0.272965	0.666667	0.558817
Com_1153_neg	Setipiprant	C24 H19 F N2 O3	402.138	1.398	Full match	No results	No results	5.18682e+06	5.8074e+06	4.85502e+06	7.37292e+06	7.15771e+06	7.21976e+06	4.17716e+06	5.08411e+06	4.78813e+06	1.78306e+06	4.70519e+06	4.37363e+06	1.50934	0.593919	0.0385127	0.972222	0.657476
Com_1156_neg	Vanillic acid	C8 H8 O4	168.041	1.899	Not the top hit	Full match	Full match	6.58351e+06	8.73669e+06	6.97669e+06	1.04223e+07	1.05719e+07	1.10107e+07	1.05859e+07	1.52798e+07	1.44117e+07	5.72917e+06	8.88685e+06	6.70114e+06	0.881599	-0.181805	0.672574	0.583333	0.321707
Com_115_neg	D-(+)-Glucose	C6 H12 O6	90.031	1.743	No results	Invalid mass	No results	2.25599e+07	2.54325e+07	1.90597e+07	2.66698e+07	3.4335e+07	2.22419e+07	1.88516e+07	2.6419e+07	4.19162e+07	9.90784e+06	7.04868e+07	6.48474e+07	0.646644	-0.628955	0.482337	0.611111	0.457929
Com_1169_neg	Ononin	C22 H22 O9	430.125	10.902	Full match	No results	No results	3.54715e+06	4.89278e+06	1.35616e+06	3.45439e+06	2.55728e+06	1.2851e+06	1.4643e+06	1.30886e+06	6.54114e+06	2.45057e+06	9.30323e+06	2.32868e+07	0.385366	-1.3757	0.333378	0.638889	0.739449
Com_1171_neg	(+)-cucurbic acid	C12 H20 O3	212.14	13.127	Full match	No results	No results	4.52495e+06	584436	3.74025e+06	4.73546e+06	3.45808e+06	3.89096e+06	4.70565e+06	1.49233e+07	7.8364e+06	3.0794e+06	2.22162e+07	1.542e+07	0.307038	-1.70351	0.0306648	0.833333	1.63878
Com_1172_neg	Paliperidone	C23 H27 F N4 O3	426.208	9.801	Full match	No results	No results	2.50968e+07	9.83854e+06	7.29075e+06	2.86635e+06	3.41562e+06	8.0718e+06	3.19862e+06	3.74344e+06	4.12494e+06	1.51978e+06	4.22488e+06	3.58014e+06	2.77464	1.4723	0.0570186	0.75	1.11229
Com_1174_neg	Ethyl (2E)-8-hydroxy-2-nonenoate	C11 H20 O3	200.14	9.662	Full match	No results	No results	7.77613e+06	7.41459e+06	3.93069e+06	8.22734e+06	6.31625e+06	6.82914e+06	7.67309e+06	8.71584e+06	5.13139e+06	2.52567e+06	6.18001e+06	1.2354e+07	0.951013	-0.0724635	0.898983	0.5	0.287599
Com_117_neg	Sulfuric acid	H2 O4 S	97.9671	1.126	Full match	No results	No results	2.80314e+08	3.13328e+08	1.23228e+08	1.50711e+08	4.95418e+08	1.59279e+08	7.07408e+07	6.42908e+07	6.21446e+07	1.42311e+07	1.68979e+08	1.39551e+08	2.92781	1.54982	0.0197892	0.888889	1.66877
Com_1181_neg	2-(alpha-D-mannosyl)-D-glyceric acid	C9 H16 O9	268.078	15.119	Full match	No results	No results	2.78777e+06	291884	215538	5.41607e+06	9.03732e+06	6.90489e+06	2.23637e+06	223101	2.92045e+06	90049.9	4.50491e+06	4.26209e+06	1.73165	0.792148	0.595506	0.666667	1.01305
Com_1184_neg	Delamanid	C25 H25 F3 N4 O6	534.172	9.756	Full match	No results	No results	5.90228e+06	3.41654e+06	1.88785e+06	5.44994e+06	5.40889e+06	2.0449e+06	1.1479e+06	3.86626e+06	9.10863e+06	1.4153e+06	1.19969e+07	9.30272e+06	0.654503	-0.611527	0.724794	0.583333	0.329888
Com_1188_neg	(-)-Podophyllotoxin	C22 H22 O8	414.13	12.124	Full match	No results	No results	808075	918085	751684	1.07025e+06	1.07321e+06	1.04116e+06	634588	752540	788623	291197	749688	761494	1.4234	0.50934	0.0553929	0.916667	0.579447
Com_1198_neg	1-Cyclohexenecarboxylic Acid	C7 H10 O2	126.068	8.728	Full match	No results	No results	2.19644e+06	3.11979e+06	2.68497e+06	3.98709e+06	8.84871e+06	3.43442e+06	2.08015e+06	1.53287e+06	7.48836e+06	2.58737e+06	8.31496e+06	1.39558e+07	0.674966	-0.567113	0.651361	0.472222	0.283885
Com_11_neg	2-Deoxypentose	C5 H10 O4	134.057	1.435	Full match	No results	No results	4.90528e+08	1.05359e+09	3.6084e+08	1.98828e+09	1.4127e+09	4.70511e+08	2.78983e+08	4.15536e+08	5.36528e+08	1.42679e+08	1.24141e+09	2.15948e+09	1.20983	0.274802	0.449198	0.611111	0.59536
Com_1202_neg	clindamycin-2-phosphate	C18 H34 Cl N2 O8 P S	504.146	2.565	Full match	No results	No results	2.97693e+06	3.57437e+06	2.95938e+06	4.13499e+06	3.73465e+06	4.26574e+06	2.425e+06	2.72619e+06	2.94167e+06	1.07771e+06	4.11313e+06	3.39032e+06	1.29819	0.376501	0.15276	0.833333	0.495447
Com_120_neg	zinniol	C15 H22 O4	266.154	13.424	No match	No results	Invalid mass	2.14181e+08	2.4769e+08	1.33593e+08	8.93595e+08	2.74267e+08	1.45833e+08	9.12776e+07	4.98862e+07	1.5391e+08	1.84716e+07	7.1757e+07	7.77494e+07	4.12299	2.04369	0.00714872	0.944444	1.88691
Com_1217_neg	lixivaptan	C27 H21 Cl F N3 O2	473.13	8.893	Full match	No results	No results	4.25879e+06	2.17731e+06	521610	2.54152e+06	1.02431e+06	678364	744701	2.59715e+06	6.17457e+06	2.32281e+06	7.33363e+06	2.12835e+07	0.276888	-1.85262	0.106201	0.805556	1.43444
Com_1226_neg	Pyridoxal	C8 H9 N O3	167.057	11.576	Full match	No results	No results	3.92519e+06	6.39563e+06	4.19541e+06	6.18532e+06	1.02737e+07	8.00699e+06	4.78713e+06	3.2163e+06	3.5967e+06	1.60833e+06	3.00284e+06	1.34204e+07	1.31556	0.395676	0.203777	0.777778	0.656996
Com_122_neg	sinapaldehyde glucoside	C17 H22 O9	370.125	9.439	Full match	No results	No results	1.17132e+07	9.48121e+06	6.30994e+06	2.02987e+07	8.23631e+06	4.71529e+06	5.64914e+06	1.03088e+07	4.1504e+07	5.19506e+06	4.76301e+07	2.37321e+07	0.453327	-1.14137	0.26589	0.666667	0.800514
Com_1248_neg	3,5-Dihydroxy-4-[(6-O-sulfo-beta-D-glucopyranosyl)oxy]benzoic acid	C13 H16 O13 S	412.029	1.886	Full match	No results	No results	1.21304e+06	1.31191e+06	1.1222e+06	1.91508e+06	1.46255e+06	1.59364e+06	8.90745e+06	1.20234e+07	6.06477e+06	1.3928e+06	984064	888368	0.284804	-1.81196	0.173256	0.583333	1.2762
Com_124_neg	N-Acetylleucylleucine	C14 H26 N2 O4	286.188	7.27	Full match	No results	No results	1.02344e+09	1.31499e+09	1.1667e+09	1.56873e+09	1.60796e+09	1.50458e+09	5.01138e+08	8.27405e+08	8.61332e+08	2.29967e+08	5.20676e+08	6.49557e+08	2.28029	1.18922	0.00470657	1	1.24799
Com_1252_neg	(2E)-3,7-Dimethyl-2,6-octadien-1-yl beta-D-glucopyranoside	C16 H28 O6	316.187	11.688	Full match	No results	No results	7.13476e+06	4.22881e+06	4.56897e+06	1.17027e+07	1.23528e+07	6.9863e+06	5.57209e+06	4.50098e+06	2.90858e+06	1.37308e+06	1.32232e+06	1.97334e+06	2.66137	1.41217	0.00762966	0.916667	1.45604
Com_1258_neg	1-Naphthol	C10 H8 O	144.057	11.227	Full match	No results	No results	612497	857031	1.67447e+06	2.3104e+06	1.16045e+06	889429	1.49857e+06	595582	770406	1.17983e+06	830926	658654	1.35604	0.439399	0.318311	0.694444	0.370001
Com_1263_neg	1-(4-Pyridinyl)-4-piperidinecarboxamide	C11 H15 N3 O	205.122	7.997	Full match	No results	No results	580546	689956	1.14878e+06	1.6845e+06	762990	2.88935e+06	464383	575022	549303	204161	529924	1.33695e+06	2.11931	1.08359	0.0629146	0.888889	1.02735
Com_1264_neg	(-)-Andrographolide	C20 H30 O5	350.208	10.459	Full match	No results	No results	3.23732e+06	3.24178e+06	1.28567e+06	1.41437e+06	2.38751e+06	1.56396e+06	1.49647e+06	1.5813e+06	1.17237e+06	408851	882404	1.10012e+06	1.97705	0.983351	0.0256129	0.861111	0.976265
Com_1269_neg	Estramustine	C23 H31 Cl2 N O3	439.168	7.745	Full match	No results	No results	5.23226e+06	5.59345e+06	4.52079e+06	5.14314e+06	4.78571e+06	4.81184e+06	2.59811e+06	5.22789e+06	5.53151e+06	1.76646e+06	5.70321e+06	5.1956e+06	1.15619	0.209374	0.308723	0.527778	0.366706
Com_1280_neg	Flufenamic Acid	C14 H10 F3 N O2	281.067	12.25	Full match	No results	No results	1.41467e+06	2.02106e+06	896068	1.25457e+06	861246	897269	4.01906e+06	1.03155e+06	2.13333e+06	2.21652e+06	1.71093e+06	559277	0.629346	-0.668074	0.313794	0.722222	0.464969
Com_1283_neg	Paeonolide	C20 H28 O12	460.156	9.084	Full match	No results	No results	1.1473e+06	817817	716422	877724	835668	851086	3.64679e+06	2.57722e+06	2.40954e+06	636266	1.50113e+06	2.70671e+06	0.389238	-1.36128	0.0219945	0.833333	1.25501
Com_128_neg	FG7175000	C9 H7 N O	145.052	5.783	Full match	No results	No results	9.95603e+07	1.2087e+08	1.21566e+07	7.27491e+07	3.60331e+07	2.36727e+07	1.81919e+07	4.14744e+07	4.35297e+07	1.95732e+07	6.56965e+07	1.03985e+09	0.297189	-1.75055	0.720283	0.527778	0.379789
Com_1310_neg	Isofraxidin	C11 H10 O5	222.052	10.361	Full match	No results	No results	1.79978e+06	1.77943e+06	421934	1.06558e+06	586860	1.24871e+06	672986	453439	1.93478e+07	446565	1.10259e+06	1.11366e+06	0.298322	-1.74506	0.774399	0.555556	0.408729
Com_1324_neg	9-Oxononanoic acid	C9 H16 O3	172.109	9.243	Full match	No results	No results	1.50766e+07	1.06705e+07	8.56718e+06	2.85597e+07	1.53468e+07	9.31183e+06	4.08905e+06	3.87459e+06	6.6216e+06	2.49497e+06	5.39057e+06	5.45142e+06	3.13487	1.64841	0.00088046	1	1.51681
Com_1333_neg	PD123319	C31 H32 N4 O3	508.25	9.89	Full match	No results	No results	2.11591e+06	3.78151e+06	3.0389e+06	7.08153e+06	1.05066e+07	5.01454e+06	7.71709e+06	7.46255e+06	5.19987e+06	1.80732e+06	2.31171e+06	4.60355e+06	1.08374	0.116013	0.829281	0.5	0.486656
Com_1345_neg	Medrogestone	C23 H32 O2	340.241	13.206	Full match	No results	No results	3.84772e+06	2.65674e+06	941030	1.88166e+06	3.04532e+06	2.69811e+06	1.30537e+06	1.6326e+06	2.04169e+06	676121	4.28873e+06	3.04436e+06	1.16027	0.21446	0.51552	0.611111	0.363179
Com_1346_neg	Cicutoxin	C17 H22 O2	258.162	10.888	Full match	No results	No results	3.58059e+06	2.93898e+06	4.50586e+06	1.03744e+07	5.21433e+06	1.02285e+07	1.56708e+07	1.15291e+07	4.30161e+06	4.16463e+06	578969	1.37434e+06	0.979354	-0.0300984	0.509079	0.555556	0.606532
Com_1347_neg	Candesartan	C24 H20 N6 O3	440.16	7.725	Full match	No results	No results	3.03311e+06	3.06074e+06	3.12607e+06	4.84453e+06	2.76191e+06	3.46011e+06	1.84229e+06	4.04048e+06	4.9452e+06	1.38284e+06	5.26421e+06	5.33869e+06	0.889222	-0.169384	0.968549	0.638889	0.23714
Com_1353_neg	Tyrosol	C8 H10 O2	138.068	8.486	Full match	No results	No results	3.08392e+06	2.8923e+06	559310	2.87755e+06	2.78961e+06	3.05918e+06	4.53194e+06	3.27562e+06	1.80158e+06	1.02984e+06	2.08742e+06	5.09424e+06	0.856415	-0.223618	0.704575	0.416667	0.429383
Com_1364_neg	FMNH2	C17 H23 N4 O9 P	458.122	6.313	Full match	No results	No results	1.40361e+07	1.50524e+07	1.43689e+07	2.18881e+07	1.96328e+07	2.43698e+07	1.27896e+06	2.63265e+06	1.73539e+06	499482	792253	962325	13.8397	3.79074	2.2347e-05	1	3.78962
Com_1368_neg	(6R)-6-Hydroxy-3-(2-hydroxyethyl)-2,4,4-trimethyl-2-cyclohexen-1-one	C11 H18 O3	198.125	5.943	Full match	No results	No results	916840	1.43065e+06	613133	1.10819e+06	1.84374e+06	1.25721e+06	830636	714922	1.35113e+06	519080	3.01832e+06	1.17917e+07	0.393385	-1.34599	0.535105	0.5	0.506729
Com_1369_neg	alpkinidine	C19 H13 N3 O3	331.096	1.863	Full match	No results	No results	3.35955e+06	3.16747e+06	2.70097e+06	3.88296e+06	3.09801e+06	2.07146e+06	6.14987e+06	8.44151e+06	7.51329e+06	2.91351e+06	3.4312e+06	1.24613e+06	0.615595	-0.699946	0.341312	0.694444	0.541878
Com_136_neg	Benzyl sulfone	C14 H14 O2 S	246.073	1.427	Full match	No results	No results	6.111e+08	3.07677e+08	1.49982e+08	1.85872e+08	4.54919e+08	3.91163e+08	4.65721e+08	1.77741e+08	1.8317e+08	3.62377e+07	1.3319e+08	2.34863e+08	1.70662	0.771138	0.13969	0.75	0.994995
Com_1372_neg	clazolam	C18 H17 Cl N2 O	312.104	11.478	Full match	No results	No results	1.18788e+06	2.01593e+06	1.07427e+06	1.81799e+06	1.86171e+06	1.53127e+06	1.45009e+06	1.07024e+06	1.27068e+06	514139	756071	1.26059e+06	1.501	0.585925	0.050034	0.833333	0.635186
Com_1383_neg	Spiraprilat	C20 H26 N2 O5 S2	438.127	7.894	Full match	No results	No results	6.37673e+06	6.87112e+06	2.54651e+06	5.98366e+06	5.37143e+06	8.57845e+06	4.88108e+06	6.32415e+06	5.23936e+06	2.75306e+06	9.71724e+06	8.9266e+06	0.944146	-0.0829177	0.883948	0.5	0.227448
Com_1397_neg	Jasmonal	C14 H18 O	202.135	7.995	Full match	No results	No results	518717	616475	988824	1.26868e+06	681731	1.69183e+06	414926	513781	490801	221252	473487	789449	1.98583	0.989744	0.0251306	0.916667	0.925059
Com_139_neg	avicularin	C20 H18 O11	434.084	9.902	Partial match	No results	Full match	3.30219e+08	1.22143e+09	2.61372e+08	2.55334e+08	3.14657e+08	1.58566e+09	1.18513e+08	1.29661e+08	7.02752e+07	2.87209e+07	7.17264e+07	9.11521e+07	7.78097	2.95995	0.00143202	1	2.55405
Com_1416_neg	Salidroside	C14 H20 O7	300.12	6.944	Full match	No results	No results	4.00831e+06	3.95061e+06	4.4428e+06	5.07885e+06	3.65352e+06	6.44081e+06	5.02366e+06	8.57802e+06	7.29823e+06	2.81227e+06	2.86588e+06	1.66157e+06	0.976461	-0.0343659	0.686456	0.555556	0.304317
Com_1417_neg	Haloperidol decanoate	C31 H41 Cl F N O3	529.274	8.709	Full match	No results	No results	474381	500573	371792	567802	662768	516922	349623	429141	2.05959e+06	543292	3.03802e+06	6.57063e+06	0.238196	-2.06978	0.13488	0.638889	1.22665
Com_1419_neg	p-t-Butylbenzaldehyde	C11 H14 O	162.104	8.731	Full match	No results	No results	1.30931e+06	1.49104e+06	1.32863e+06	2.46627e+06	1.73148e+06	1.43481e+06	1.2717e+06	995531	4.26398e+06	1.33442e+06	4.37106e+06	7.10538e+06	0.50468	-0.98656	0.255684	0.555556	0.621906
Com_1420_neg	Homovanillic acid	C9 H10 O4	182.061	9.774	No match	Invalid mass	No results	1.55854e+06	1.58428e+06	1.01867e+06	1.71493e+06	4.6007e+06	1.41538e+06	1.61197e+06	549497	1.47158e+07	2.99268e+06	9.52294e+06	5.27478e+06	0.343043	-1.54354	0.229093	0.75	0.976873
Com_1431_neg	6,7,8-Trihydroxy-2H-chromen-2-one	C9 H6 O5	194.021	7.14	Full match	No results	No results	2.10218e+06	1.7821e+06	1.63684e+06	2.10207e+06	2.44439e+06	1.96417e+06	2.24804e+06	2.27577e+06	2.39225e+06	976618	2.16829e+06	2.63467e+06	0.947708	-0.0774853	0.920953	0.722222	0.243176
Com_1433_neg	(20S)-Protopanaxadiol	C30 H52 O3	460.39	14.21	Full match	No results	No results	8.39962e+06	9.46755e+06	5.61194e+06	1.26895e+07	8.8619e+06	1.26904e+07	1.14454e+07	9.41792e+06	7.18876e+06	4.09807e+06	6.06915e+06	8.77399e+06	1.22828	0.29664	0.281768	0.694444	0.380662
Com_1448_neg	5-Nitro-7,11-diazatricyclo[7.3.1.0~2,7~]trideca-2,4-dien-6-one	C11 H13 N3 O3	235.096	10.171	Full match	No results	No results	5.3027e+06	2.51688e+06	4.07302e+06	6.39278e+06	1.90734e+06	6.01242e+06	1.36564e+06	4.18168e+06	1.62777e+06	246794	1.02934e+06	653492	2.8782	1.52516	0.0182826	0.916667	1.84032
Com_1461_neg	yatein	C22 H24 O7	400.151	10.426	Full match	No results	No results	1.92041e+06	911322	416317	1.31651e+06	1.30452e+06	873302	424505	1.4235e+06	3.05299e+06	1.23022e+06	2.9447e+06	3.63101e+06	0.530607	-0.914285	0.223376	0.75	0.717038
Com_1469_neg	Phosphomevalonic acid	C6 H13 O7 P	228.041	8.209	Full match	No results	No results	1.35869e+06	1.68942e+06	991345	959513	982892	1.40955e+06	854874	1.18988e+06	1.3163e+06	474756	1.03556e+06	1.01316e+06	1.25607	0.328922	0.19051	0.666667	0.385665
Com_1475_neg	Plantamajoside	C29 H36 O16	640.2	8.789	Full match	No results	No results	3.71257e+06	1.16626e+06	578269	801895	686641	1.55985e+06	447562	2.33125e+06	2.47771e+06	1.48292e+06	1.59658e+06	2.07064e+06	0.817311	-0.291043	0.455546	0.666667	0.408825
Com_1478_neg	C1'-C9-Glycosylated UWM6	C25 H28 O9	472.172	11.519	Full match	No results	No results	755537	540237	411639	598199	889635	585897	485175	665694	1.34869e+06	357990	838420	320731	0.941356	-0.0871881	0.884992	0.555556	0.209515
Com_1480_neg	2-Phenylethyl 6-O-beta-D-xylopyranosyl-beta-D-glucopyranoside	C19 H28 O10	416.167	9.718	Full match	No results	No results	1.57029e+06	1.62755e+06	1.56877e+06	2.83027e+06	2.65653e+06	2.03888e+06	1.67877e+06	2.76269e+06	3.40225e+06	1.48049e+06	3.75999e+06	3.36219e+06	0.747416	-0.420016	0.214586	0.722222	0.427156
Com_1486_neg	Dibutyl phthalate	C16 H22 O4	278.15	12.375	Invalid mass	No results	No results	4.48573e+06	4.47906e+06	2.82674e+06	4.49158e+06	4.29984e+06	6.82421e+06	2.43611e+06	3.36044e+06	3.08143e+06	1.27115e+06	3.3548e+06	2.48825e+06	1.71378	0.777185	0.0156794	0.916667	0.782224
Com_1491_neg	Aloeresin A	C28 H28 O11	540.165	10.547	Full match	No results	No results	4.61694e+06	2.89967e+06	8.472e+06	5.86499e+06	3.00974e+06	9.18685e+06	489972	1.84523e+06	1.18956e+06	187070	488476	484202	7.26868	2.86169	0.000457849	1	2.95983
Com_1494_neg	23-acetoxy-12-epi-deoxoscalarin	C29 H44 O6	488.311	10.166	Full match	No results	No results	1.92886e+06	3.43285e+06	2.97375e+06	2.16948e+06	3.56802e+06	2.99416e+06	746008	1.18494e+06	1.33627e+06	458269	1.25213e+06	1.14544e+06	2.78735	1.4789	0.000624266	1	1.46735
Com_149_neg	Phenylacetylene	C8 H6	102.047	9.44	Full match	No results	No results	1.30337e+07	1.10165e+07	8.88561e+06	2.14756e+07	1.13243e+07	1.17412e+07	7.60726e+06	1.37386e+07	3.23502e+07	8.08299e+06	3.79678e+07	2.18527e+07	0.637147	-0.650301	0.353269	0.638889	0.469931
Com_1502_neg	Streptamine 4-phosphate	C6 H15 N2 O7 P	258.062	8.52	Full match	No results	No results	1.48849e+06	1.34036e+06	731006	1.1328e+06	1.11903e+06	991753	1.21397e+07	9.41006e+06	2.49654e+06	876929	2.20277e+06	2.18993e+06	0.232073	-2.10735	0.0442806	0.861111	1.6756
Com_1503_neg	4-amino-2-hydroxyamino-6-nitrotoluene	C7 H9 N3 O3	183.065	10.895	Full match	No results	No results	3.44869e+06	3.21604e+06	612057	1.00613e+06	1.25835e+06	1.08537e+06	3.80588e+06	3.60771e+06	1.65062e+06	5.43909e+06	3.10184e+06	7.04383e+06	0.431119	-1.21384	0.0232976	0.888889	1.30385
Com_1506_neg	Pruvanserin	C22 H21 F N4 O	376.172	8.477	Full match	No results	No results	1.4552e+07	4.88151e+06	5.51326e+06	7.07441e+06	4.43816e+06	5.0681e+06	5.82215e+06	6.92209e+06	3.9427e+06	1.88777e+06	3.71425e+06	4.00337e+06	1.57945	0.659424	0.117695	0.777778	0.623533
Com_1514_neg	Swertianolin	C20 H20 O11	436.099	6.313	Full match	No results	No results	1.70044e+06	2.43378e+06	1.84349e+06	2.60054e+06	3.43906e+06	2.25612e+06	2.92353e+06	3.34936e+06	3.19016e+06	1.04771e+06	2.09062e+06	2.57343e+06	0.940599	-0.0883477	0.915686	0.583333	0.352129
Com_1515_neg	lobechidine A	C14 H27 N O3	257.198	13.07	Full match	No results	No results	8.95264e+06	2.31159e+06	826388	3.92572e+06	1.52221e+06	1.01689e+06	790327	1.22234e+06	1.46955e+06	464939	1.28376e+06	870299	3.04127	1.60468	0.0796939	0.805556	1.13796
Com_1521_neg	Sakuranin	C22 H24 O10	448.135	11.674	Full match	No results	No results	397735	476018	369500	494893	508359	517371	317885	382854	355059	144155	384523	354252	1.42561	0.511583	0.0507569	0.944444	0.578913
Com_1529_neg	[(2-Nitrophenyl)sulfanyl]acetic acid	C8 H7 N O4 S	213.009	8.001	Full match	No results	No results	2.54145e+06	723367	597681	779475	799937	970531	2.59026e+06	1.02465e+06	1.20911e+06	326352	555586	1.6549e+06	0.871154	-0.199	0.871474	0.583333	0.361447
Com_152_neg	2-hydroxyquinoline	C9 H7 N O	145.052	7.589	Partial match	No results	Full match	1.61821e+08	1.18485e+08	2.20121e+07	2.19255e+08	5.78346e+07	3.36502e+07	2.73737e+07	2.0478e+08	424189319	1.25357e+08	3.94131e+08	8.25041e+08	0.306396	-1.70653	0.121267	0.777778	1.45469
Com_1532_neg	1-O-(indol-3-ylacetyl)-beta-D-glucose	C16 H19 N O7	337.115	8.355	Full match	No results	No results	2.09061e+06	1.25943e+06	762454	1.30891e+06	1.06438e+06	1.2782e+06	739116	993708	1.12361e+06	405140	1.32491e+06	835594	1.43192	0.517952	0.112976	0.75	0.537333
Com_153_neg	trans-Cinnamic acid	C9 H8 O2	148.052	9.439	Full match	Full match	No results	1.10006e+07	8.99692e+06	7.34823e+06	1.80697e+07	8.52582e+06	9.70142e+06	5.96594e+06	1.1364e+07	2.86606e+07	7.4244e+06	3.46184e+07	1.93623e+07	0.5926	-0.754869	0.294781	0.666667	0.536226
Com_1542_neg	LAPPAOL C	C30 H34 O10	554.213	10.101	Full match	No results	No results	5.78365e+06	3.79562e+06	2.91463e+06	4.24594e+06	4.19346e+06	5.0757e+06	9.89364e+06	5.42108e+06	6.90826e+06	2.47311e+06	3.7885e+06	3.66526e+06	0.808993	-0.305801	0.577213	0.527778	0.359762
Com_154_neg	4-Oxoproline	C5 H7 N O3	129.042	1.416	Not the top hit	Full match	No results	2.72795e+08	3.89581e+08	1.67769e+08	2.26272e+08	2.78368e+08	2.12157e+08	1.72762e+08	1.6938e+08	1.20283e+08	6.43278e+07	1.85038e+08	1.16817e+08	1.86692	0.900658	0.0100365	0.916667	0.901075
Com_1550_neg	2,3-Dihydroxyolean-12-ene-23,28-dioic acid	C30 H46 O6	502.327	10.754	Full match	No results	No results	9.843e+06	7.46156e+06	5.38643e+06	4.87937e+06	2.00839e+06	2.15446e+06	1.34647e+06	1.78224e+06	2.6799e+06	828928	2.17573e+06	1.79894e+06	2.99025	1.58027	0.0119335	0.888889	1.3822
Com_1561_neg	Ethinylestradiol sulfonate	C23 H30 O4 S	402.188	10.849	Full match	No results	No results	2.43915e+06	2.51485e+06	1.27252e+06	2.49403e+06	2.31688e+06	2.22629e+06	4.52293e+06	4.87164e+06	2.76069e+06	1.24709e+06	1.25322e+06	4.71189e+06	0.684845	-0.546151	0.413925	0.666667	0.521392
Com_1568_neg	Kynurenine	C10 H12 N2 O3	208.084	7.266	Full match	No results	No results	3.57608e+06	2.67969e+06	2.2815e+06	3.44638e+06	3.29742e+06	3.3237e+06	3.31786e+06	3.67366e+06	2.5709e+06	3.91987e+06	2.8635e+06	3.79874e+06	0.923564	-0.114716	0.439666	0.666667	0.112828
Com_1580_neg	10-Hydroxydecanoic acid	C10 H20 O3	188.14	8.618	Full match	No results	No results	3.47115e+06	2.78307e+06	3.74258e+06	3.97516e+06	3.25522e+06	2.95611e+06	3.63562e+06	3.04882e+06	2.8628e+06	1.63053e+06	1.38082e+06	3.03098e+06	1.29467	0.37258	0.116393	0.75	0.443111
Com_15_neg	(+)-Catechin hydrate (+)-랏꿱羹	C15 H14 O6	290.078	6.993	Partial match	No results	Full match	2.70154e+09	2.50916e+09	3.39405e+08	1.64781e+09	4.01785e+09	2.49901e+09	7.71202e+09	4.14569e+09	4.09825e+09	3.4602e+09	7.37135e+09	6.20075e+09	0.415747	-1.26622	0.0310756	0.972222	1.495
Com_160_neg	Salicylic acid	C7 H6 O3	138.031	5.816	Full match	Full match	Full match	2.89108e+08	2.84616e+08	1.37629e+08	2.36731e+08	2.52596e+08	2.80069e+08	2.05001e+08	2.4976e+08	1.78728e+08	6.82054e+07	2.07527e+08	4.97974e+08	1.05227	0.0735036	0.549901	0.694444	0.37427
Com_1613_neg	Allopregnanolone	C21 H34 O2	318.256	14.62	Full match	No results	No results	8.42621e+06	1.26428e+07	7.74852e+06	1.27575e+07	1.60933e+07	1.92498e+07	5.26684e+06	7.17718e+06	6.7947e+06	2.5054e+06	6.98308e+06	6.00385e+06	2.21468	1.1471	0.00449908	1	1.11722
Com_1615_neg	IN00150	C18 H16 O6	328.093	7.529	Full match	No results	No results	1.66676e+06	2.41688e+06	1.16398e+06	1.95875e+06	3.72072e+06	3.72567e+06	2.0249e+06	2.80374e+06	1.21161e+06	494393	1.31638e+06	4.97939e+06	1.14203	0.191605	0.459732	0.583333	0.569301
Com_1619_neg	(~232~Th)Thorium	Th	232.039	7.031	Full match	No results	No results	728684	854557	637688	1.40822e+06	2.00686e+06	1.254e+06	5.32417e+06	7.11952e+06	6.79539e+06	2.99522e+06	2.91465e+06	3.64948e+06	0.23925	-2.06341	0.000145158	1	2.07364
Com_1630_neg	(4-Azidophenyl)methanol	C7 H7 N3 O	149.06	8.733	Full match	No results	No results	611010	979711	501215	1.51167e+06	2.31504e+06	676532	841766	512121	3.16464e+06	951372	3.40395e+06	4.84622e+06	0.480695	-1.05681	0.23664	0.694444	0.801729
Com_1642_neg	Amrubicin	C25 H25 N O9	483.151	11.427	Full match	No results	No results	386632	451958	343764	515796	509882	514252	310145	352676	589161	136795	708946	709453	0.969759	-0.0443012	0.721835	0.472222	0.311679
Com_1643_neg	Nandrolone	C18 H26 O2	274.194	11.886	Full match	No results	No results	5.02298e+06	4.9359e+06	1.7712e+06	4.92289e+06	3.5245e+06	4.81394e+06	4.88378e+06	3.70151e+06	2.69193e+06	738384	3.3124e+06	6.66281e+06	1.13645	0.184532	0.491941	0.638889	0.530941
Com_1653_neg	(2,3,4-Trimethoxy-6-octanoylphenyl)acetaldehyde	C19 H28 O5	336.192	11.318	Full match	No results	No results	1.37809e+06	698367	535739	742327	768306	768455	507938	554578	538842	206864	528332	508723	1.71909	0.781643	0.0222981	0.944444	0.766589
Com_1661_neg	(2E,4Z)-2,4-Octadienal	C8 H12 O	124.088	8.732	Full match	No results	No results	1.45484e+06	1.7885e+06	904722	2.20023e+06	2.81246e+06	1.45486e+06	1.2665e+06	927989	3.9676e+06	1.0431e+06	4.13115e+06	6.57267e+06	0.592753	-0.754497	0.447403	0.583333	0.459504
Com_1676_neg	Chartreusin	C32 H32 O14	640.178	10.6	Full match	No results	No results	3.05929e+06	2.32583e+06	1.35159e+06	2.87323e+06	5.15477e+06	2.15268e+06	2.50611e+06	3.15158e+06	3.56652e+06	1.93664e+06	4.45026e+06	4.43717e+06	0.843832	-0.244972	0.375951	0.666667	0.346255
Com_1685_neg	L-(+)-Tartaric acid	C4 H6 O6	150.016	15.015	Full match	Full match	No results	1.26979e+06	2.26859e+06	1.72935e+06	2.89334e+06	3.5615e+06	2.87581e+06	895650	1.24696e+06	1.80229e+06	395748	2.11517e+06	1.85274e+06	1.75703	0.81314	0.0644421	0.833333	0.924272
Com_1708_neg	Lusitanicoside	C21 H30 O10	442.182	10.995	Full match	No results	No results	579326	671338	480284	737700	717142	712358	502034	590179	595938	237027	617337	556302	1.25795	0.331072	0.15101	0.777778	0.421128
Com_1724_neg	Rollicosin	C22 H36 O6	396.25	12.328	Full match	No results	No results	1.64456e+06	1.40892e+06	855574	551029	771771	835120	408178	473069	456587	151656	388966	599393	2.44849	1.29189	0.00564492	0.972222	1.24764
Com_1725_neg	Estra-1,3,5(10)-trien-3-ol	C18 H24 O	256.183	11.883	Full match	No results	No results	3.66632e+06	3.52064e+06	1.18278e+06	3.48553e+06	2.79074e+06	3.10542e+06	3.62058e+06	2.60279e+06	1.93265e+06	495692	2.34414e+06	6.00245e+06	1.0443	0.0625421	0.593195	0.611111	0.51584
Com_1730_neg	2,2'-Bis(benzyloxy)-1,1'-binaphthalene	C34 H26 O2	466.195	10.746	Full match	No results	No results	4.95217e+06	2.0447e+06	2.89964e+06	4.28378e+06	1.55895e+06	4.82056e+06	5.3486e+06	1.01999e+07	5.62931e+06	2.73655e+06	7.29686e+06	3.34198e+06	0.595018	-0.748994	0.0969498	0.805556	0.777167
Com_173_neg	5-Hydroxyindole-3-acetic acid	C10 H9 N O3	191.058	7.579	Full match	Full match	No results	1.30628e+08	9.43216e+07	1.67884e+07	1.81209e+08	4.56505e+07	2.50146e+07	2.20213e+07	1.71793e+08	4.26271e+08	9.02342e+07	3.23458e+08	7.38115e+08	0.278579	-1.84384	0.116272	0.75	1.55599
Com_1740_neg	dermacozine E	C23 H16 N4 O3	396.123	9.447	Full match	No results	No results	1.14057e+06	1.30028e+06	984355	1.44786e+06	1.43823e+06	1.48971e+06	1.07058e+06	1.20789e+06	1.18147e+06	447094	1.08814e+06	1.24415e+06	1.2503	0.322269	0.172998	0.777778	0.434404
Com_1749_neg	Demethylwedelolactone 혼솖蹉診앞코焦	C15 H8 O7	300.032	10.691	No match	No results	Invalid mass	694505	1.08094e+06	810684	2.80484e+06	1.0676e+06	2.49947e+06	808136	1.14857e+06	1.23058e+06	379261	1.11465e+06	869189	1.61395	0.690593	0.213931	0.583333	0.624157
Com_174_neg	L-Threonic acid-1,4-lactone	C4 H6 O4	118.026	1.412	Not the top hit	Full match	No results	9.87715e+07	1.57228e+08	6.10668e+07	1.91211e+08	1.75593e+08	1.806e+08	7.98116e+07	9.14856e+07	1.2515e+08	4.2651e+07	1.37096e+08	1.75894e+08	1.3257	0.406749	0.299187	0.722222	0.477357
Com_1766_neg	4-Hydroxy-5-methyl-3-tetradecyldihydro-2(3H)-furanone	C19 H36 O3	312.265	13.857	Full match	No results	No results	2.50183e+06	1.24603e+06	1.02033e+06	2.48622e+06	2.21028e+06	1.76141e+06	1.0674e+06	2.1571e+06	1.15944e+06	390032	1.30269e+06	2.78859e+06	1.26631	0.340626	0.305169	0.638889	0.569444
Com_1771_neg	Naldemedine	C32 H34 N4 O6	570.245	10.889	Full match	No results	No results	2.5756e+06	1.49198e+06	1.09435e+06	1.82446e+06	1.58227e+06	1.59855e+06	1.74484e+06	1.96528e+06	1.63107e+06	691299	837923	1.62465e+06	1.19684	0.259227	0.33163	0.472222	0.366447
Com_178_neg	2-Hydroxycinnamic acid	C9 H8 O3	164.047	3.219	Not the top hit	Full match	Full match	1.04614e+08	1.48772e+08	5.80435e+07	1.02098e+08	1.17121e+08	1.14315e+08	2.50229e+08	1.91102e+08	1.10132e+08	6.21176e+07	1.26078e+08	5.4329e+08	0.50272	-0.992173	0.19016	0.75	0.772547
Com_1795_neg	NNK	C10 H13 N3 O2	207.101	9.03	Full match	No results	No results	688614	940871	728035	2.4253e+06	3.03569e+06	997297	780865	880630	1.4945e+06	383223	1.99924e+06	2.54984e+06	1.08995	0.124257	0.818031	0.472222	0.346621
Com_1803_neg	(-)-pinellic acid	C18 H34 O5	330.239	10.719	Full match	No results	No results	4.32758e+06	6.43676e+06	1.99661e+06	2.80092e+06	3.15532e+06	3.34041e+06	1.16161e+06	906254	1.48261e+06	373348	1.2802e+06	2.26522e+06	2.95312	1.56224	0.00410595	0.972222	1.58324
Com_1812_neg	Hydrocortisone Valerate	C26 H38 O6	446.265	13.246	Full match	No results	No results	548425	1.20776e+06	554946	575300	588148	588203	2.88058e+06	1.26254e+06	1.67758e+06	1.72126e+06	2.79088e+06	550004	0.37332	-1.42151	0.0135107	0.861111	1.25253
Com_1814_neg	N,N'-1,4-Phenylenebis(1,1-diphenylmethanimine)	C32 H24 N2	436.193	11.024	Full match	No results	No results	3.23571e+06	4.55941e+06	6.55587e+06	7.14862e+06	4.44352e+06	6.51164e+06	1.2995e+06	2.10112e+06	7.50781e+06	1.02519e+06	1.41549e+06	2.89798e+06	1.99757	0.998249	0.0266395	0.833333	1.25789
Com_1825_neg	Adenylthiomethylpentose	C11 H15 N5 O3 S	297.088	8.001	Full match	No results	No results	1.10407e+06	1.93194e+06	769058	1.37288e+06	1.41615e+06	1.16103e+06	419332	434495	317984	125777	332175	356644	3.90409	1.96499	0.000178255	1	1.92512
Com_1832_neg	Di-2,5-cyclohexadien-1-yl(octyl)silane	C20 H32 Si	300.228	13.096	Full match	No results	No results	781722	898383	771567	2.32006e+06	1.36386e+06	1.31901e+06	935709	1.7546e+06	1.14651e+06	615447	1.0879e+06	2.54966e+06	0.921478	-0.117978	0.831017	0.555556	0.289303
Com_1843_neg	4-Bromo-N-ethyl-N,2-dimethylaniline	C10 H14 Br N	227.031	12.231	Full match	No results	No results	1.05362e+06	2.52396e+06	2.25757e+06	2.42886e+06	3.0814e+06	3.8771e+06	1.24207e+06	1.76686e+06	1.53167e+06	1.07374e+06	2.20274e+06	2.45969e+06	1.48125	0.566819	0.136221	0.777778	0.514289
Com_1849_neg	1-(4,6-Dimethoxy-1-benzofuran-2-yl)ethanone	C12 H12 O4	220.073	8.703	Full match	No results	No results	3.21273e+06	1.18181e+07	7.7452e+06	1.23737e+06	3.9797e+06	1.29836e+06	430266	416045	560308	145225	290936	288307	13.7448	3.78082	0.000619178	1	3.28386
Com_184_neg	Phenol	C6 H6 O	94.0416	1.295	Full match	No results	No results	6.27251e+08	7.74594e+08	6.25463e+08	9.32809e+08	1.04516e+09	9.7232e+08	5.31025e+08	7.02471e+08	6.20642e+08	2.33247e+08	5.48295e+08	5.63439e+08	1.55593	0.637774	0.0331169	0.944444	0.692953
Com_1851_neg	grandidentatin	C21 H28 O9	424.173	8.487	Full match	No results	No results	4.43022e+06	2.57258e+06	1.96751e+06	2.69668e+06	3.53412e+06	3.02204e+06	2.6186e+06	3.14501e+06	1.39048e+06	1.02077e+06	1.01748e+06	1.96164e+06	1.63378	0.708214	0.0401877	0.833333	0.775304
Com_1854_neg	2-ACETYL-2-DECARBAMOYLOXYTETRACYCLINE	C23 H25 N O9	459.151	11.381	Full match	No results	No results	499392	580084	412638	613564	608182	612153	392595	467217	423907	165378	443275	436412	1.42822	0.514218	0.0581583	0.888889	0.589137
Com_1861_neg	Buclizine	C28 H33 Cl N2	432.235	9.22	Full match	No results	No results	864038	916152	655750	1.50971e+06	881617	1.49222e+06	3.67539e+06	1.2679e+06	1.07962e+06	495237	768625	658087	0.795419	-0.330214	0.919134	0.444444	0.396532
Com_1863_neg	5-(Chlorocarbonyl)-5-hexen-1-yl 4-chlorobenzoate	C14 H14 Cl2 O3	300.032	13.852	Full match	No results	No results	2.99065e+06	3.52713e+06	2.21187e+06	4.00261e+06	5.92027e+06	4.61521e+06	1.27332e+06	1.26636e+06	1.09458e+06	497803	788148	948864	3.96447	1.98713	4.72019e-05	1	1.90161
Com_1877_neg	10-Undecyn-1-yl benzenesulfonate	C17 H24 O3 S	308.144	8.059	Full match	No results	No results	2.68173e+06	3.51413e+06	5.74206e+06	1.28525e+07	5.46293e+06	1.00502e+07	813472	1.32917e+06	2.63951e+06	787837	814713	1.4102e+06	5.1705	2.37031	0.000517515	1	2.20834
Com_1895_neg	Ricinoleic Acid	C18 H34 O3	298.25	11.891	Full match	No results	No results	791469	706689	300018	841558	689758	722078	366183	518113	618890	381584	7.98614e+06	828553	0.37867	-1.40099	0.646825	0.583333	0.345602
Com_190_neg	3-(1H-Imidazol-4-yl)-2-oxopropyl phosphate	C6 H7 N2 O5 P	218.009	1.533	Full match	No results	No results	5.54622e+07	1.12596e+08	5.13006e+07	9.6751e+07	1.4195e+08	8.54007e+07	3.03198e+07	3.29296e+07	4.63661e+07	2.11726e+07	6.31425e+07	5.58639e+07	2.17563	1.12143	0.00763824	0.888889	1.07957
Com_1924_neg	8-Bromo-2,6-dimethyl-2-octene	C10 H19 Br	218.068	6.721	Full match	No results	No results	1.44292e+06	1.08122e+06	679848	1.13974e+06	1.12019e+06	1.01623e+06	2.29719e+06	2.26322e+06	1.44071e+06	1.18645e+06	2.89118e+06	2.31732e+06	0.522758	-0.935786	0.00495774	0.944444	0.900897
Com_1931_neg	Velloquercetin	C20 H16 O7	368.091	6.036	Full match	No results	No results	552160	799299	494386	692638	997027	716916	3.78146e+06	4.28481e+06	3.11137e+06	1.23119e+06	3.65045e+06	5.19906e+06	0.200036	-2.32167	0.000219964	1	2.22577
Com_1932_neg	aplidiopsamine A	C17 H13 N7	315.122	9.71	Full match	No results	No results	3.7116e+06	1.96178e+06	2.22861e+06	3.92136e+06	5.03758e+06	3.41008e+06	2.48967e+06	4.13649e+06	4.43703e+06	1.77759e+06	1.97554e+06	2.35266e+06	1.18068	0.239613	0.426421	0.583333	0.317743
Com_1944_neg	MFCD00041564	C11 H22 O3	202.156	12.289	Full match	No results	No results	1.26832e+06	1.13115e+06	1.29141e+06	1.17503e+07	1.38661e+06	1.7117e+06	939764	1.14854e+06	1.05014e+06	524425	818001	1.2446e+06	3.23806	1.69513	0.102542	0.944444	1.0303
Com_1951_neg	callystatin A	C29 H44 O4	456.322	12.453	Full match	No results	No results	2.86153e+06	1.5419e+06	2.41695e+06	883436	859128	873953	513187	654491	680314	240919	642397	649081	2.79166	1.48112	0.00704038	1	1.31903
Com_1952_neg	(3S,6R)-3,6-Dihydroxy-10-methylundecanoic acid	C12 H24 O4	232.166	9.84	Full match	No results	No results	2.22939e+06	3.52783e+06	1.44086e+06	5.04077e+06	3.35697e+06	2.51796e+06	3.76592e+06	2.3052e+06	1.111e+06	417087	2.17916e+06	5.34753e+06	1.19753	0.260067	0.377475	0.611111	0.679668
Com_1954_neg	Auriculoside	C22 H26 O10	450.153	6.408	Full match	No results	No results	5.03732e+06	6.29656e+06	6.04466e+06	8.47242e+06	5.59929e+06	6.70556e+06	1.28788e+06	1.74474e+06	2.5551e+06	528883	909831	825581	4.85937	2.28077	0.000418516	1	2.3447
Com_195_neg	Indole-3-carbidol	C9 H9 N O	147.068	7.594	Full match	No results	No results	6.49321e+07	5.5431e+07	8.93124e+06	1.24085e+08	2.44179e+07	1.37349e+07	1.36249e+07	9.70927e+07	1.563e+08	5.34329e+07	2.40465e+08	4.75781e+08	0.281213	-1.83026	0.112484	0.75	1.5873
Com_1968_neg	L-(-)-Serine	C3 H7 N O3	105.042	2.362	Full match	No results	No results	4.53251e+06	4.03895e+06	3.54729e+06	3.72161e+06	4.81118e+06	2.80972e+06	1.73118e+06	1.89486e+06	500186	1.09515e+06	1.13225e+06	1.20378e+06	3.1044	1.63432	0.000841949	1	1.66506
Com_1975_neg	butanilicaine	C13 H19 Cl N2 O	254.117	10.156	Full match	No results	No results	1.49736e+06	1.84138e+06	1.23973e+06	852983	1.52606e+06	1.42414e+06	6.41411e+06	4.55514e+06	1.15583e+06	349148	1.51811e+06	1.81959e+06	0.530084	-0.915706	0.556993	0.611111	0.75962
Com_1978_neg	MFCD00078645	C5 H8 Cl N5	173.047	10.742	Full match	No results	No results	1.77572e+06	2.38799e+06	1.33766e+06	2.17262e+06	1.63504e+06	1.71844e+06	928249	1.37795e+06	2.19728e+06	812541	2.11534e+06	6.28188e+06	0.804148	-0.314467	0.946758	0.555556	0.130723
Com_1990_neg	Izonsteride	C24 H26 N2 O S2	422.148	12.086	Full match	No results	No results	2.64128e+06	2.59292e+06	2.53954e+06	2.62056e+06	2.95668e+06	3.48118e+06	4.21942e+06	3.47469e+06	2.61497e+06	2.69694e+06	2.66603e+06	6.61855e+06	0.755124	-0.405215	0.199262	0.75	0.33449
Com_19_neg	D-(-)-Fructose	C6 H12 O6	90.0314	1.744	No match	Invalid mass	No results	1.09664e+09	1.20721e+09	8.97433e+08	1.39572e+09	1.56934e+09	1.16471e+09	6.26545e+08	8.54896e+08	1.12068e+09	3.23281e+08	4.60689e+09	2.03471e+09	0.766286	-0.384045	0.834066	0.611111	0.263904
Com_2001_neg	Ethyl 1-(4-ethoxyphenyl)-4-hydroxy-1H-pyrazole-3-carboxylate	C14 H16 N2 O4	276.111	8.159	Full match	No results	No results	1.12482e+06	1.51815e+06	674082	1.14868e+06	1.51507e+06	1.28142e+06	1.83179e+06	1.31725e+06	2.00759e+06	850670	2.1814e+06	5.17987e+06	0.543231	-0.880362	0.119744	0.805556	0.724243
Com_2010_neg	Cucurbitacin S	C30 H42 O6	498.296	12.951	Full match	No results	No results	714246	479089	384591	534372	523633	536274	332680	388903	401275	153959	406985	377998	1.53856	0.621581	0.0301446	0.916667	0.654055
Com_2012_neg	4-(3,5-Difluorophenyl)-1H-1,2,3-triazole	C8 H5 F2 N3	181.045	3.546	Full match	No results	No results	1.04363e+06	1.18574e+06	663489	942530	881367	893637	3.78712e+06	4.23603e+06	3.66168e+06	1.96848e+06	3.30915e+06	4.81533e+06	0.25762	-1.95668	1.40902e-05	1	1.89132
Com_2013_neg	Olprinone	C14 H10 N4 O	250.086	9.566	Full match	No results	No results	165267	199278	97650.4	244706	197357	186328	123568	211833	202058	80308.6	113721	242714	1.11947	0.162811	0.5083	0.527778	0.308524
Com_2016_neg	2-(1-Cyclopenten-1-yl)ethyl benzenesulfonate	C13 H16 O3 S	252.083	8.846	Full match	No results	No results	459631	533933	400988	764989	1.02947e+06	557897	409198	727211	488600	208669	1.01985e+06	808486	1.02318	0.0330632	0.747388	0.472222	0.31472
Com_2019_neg	JQ1	C23 H25 Cl N4 O2 S	456.14	11.411	Full match	No results	No results	426519	486056	359170	538911	532733	520355	322785	383549	372625	141245	370073	363106	1.46604	0.551929	0.0446369	0.888889	0.617784
Com_2022_neg	Elvitegravir	C23 H23 Cl F N O5	447.123	8.727	Full match	No results	No results	1.15203e+06	1.05184e+06	519251	1.49997e+06	896464	673780	445706	567131	2.14004e+06	517468	4.32948e+06	2.51085e+06	0.551185	-0.859392	0.537102	0.527778	0.403678
Com_2023_neg	NL3600000	C10 H11 N3 O	189.091	8.731	Full match	No results	No results	958579	1.00637e+06	751279	1.27022e+06	1.8457e+06	1.06137e+06	667076	799954	1.88817e+06	735562	2.55222e+06	4.29166e+06	0.630431	-0.66559	0.485045	0.527778	0.372927
Com_2031_neg	Aloin B	C21 H22 O9	418.125	9.596	Full match	No results	No results	739152	832714	571550	1.13342e+06	898951	881331	869584	974462	803417	350699	785458	1.33243e+06	0.988481	-0.0167148	0.853031	0.5	0.279098
Com_2046_neg	(+)-catechin 7-O-beta-D-xyloside	C20 H22 O10	422.119	9.337	Full match	No results	No results	845973	974665	765625	1.00428e+06	1.11362e+06	1.03515e+06	585387	1.04942e+06	3.43092e+06	1.26981e+06	3.27997e+06	6.52579e+06	0.355567	-1.49181	0.105793	0.805556	1.01024
Com_2047_neg	Sesartemin	C23 H26 O8	430.161	11.855	Full match	No results	No results	763320	870999	638564	967183	950874	1.07068e+06	607302	696393	706503	265158	682389	656730	1.45571	0.54172	0.0483818	0.888889	0.603339
Com_2053_neg	2,6-Dimethyl-1-hepten-4-yl 4-methylbenzenesulfonate	C16 H24 O3 S	296.146	6.77	Full match	No results	No results	1.89553e+06	1.12228e+06	789302	1.48715e+06	1.01365e+06	671464	1.43817e+06	5.26349e+06	1.14844e+06	2.30074e+06	1.36851e+06	4.88265e+06	0.42552	-1.2327	0.049455	0.833333	1.00874
Com_2055_neg	amphidinolide B6	C32 H52 O7	548.369	14.073	Full match	No results	No results	3.8211e+06	1.63278e+06	908456	748870	849915	1.31352e+06	595505	355233	625674	205832	450884	511131	3.37965	1.75687	0.00513901	1	1.52533
Com_2060_neg	Paraldehyde	C6 H12 O3	132.078	8.397	Full match	No results	No results	2.77523e+06	1.64522e+06	982020	2.29664e+06	2.3744e+06	1.62677e+06	1.16059e+06	1.71311e+06	1.16065e+06	528142	804206	1.13839e+06	1.79863	0.846901	0.0241536	0.833333	0.837747
Com_2062_neg	Diisodecyl phthalate	C28 H46 O4	446.338	15.112	Full match	No results	No results	1.52018e+06	3.52821e+06	2.49401e+06	6.43393e+06	1.17186e+07	5.5356e+06	432207	605698	654430	133893	767476	526347	10.0096	3.32332	0.000233266	1	3.06334
Com_206_neg	2-(Benzoylamino)benzoate	C14 H10 N O3	240.066	12.232	Full match	No results	No results	8.13989e+07	1.44573e+08	1.22142e+08	2.08858e+08	1.98571e+08	1.7611e+08	8.67655e+07	1.15766e+08	1.08821e+08	6.99767e+07	1.49509e+08	1.20024e+08	1.43141	0.517439	0.0930772	0.805556	0.481809
Com_2077_neg	Dibenzothiophene sulfone	C12 H8 O2 S	216.024	1.102	Full match	No results	No results	1.00061e+06	1.36717e+06	1.21522e+06	1.15939e+06	1.7431e+06	1.60494e+06	2.03093e+06	2.36998e+06	6.65775e+06	894033	1.0903e+06	1.77422e+06	0.546016	-0.872985	0.245686	0.694444	0.695092
Com_2079_neg	10-desacetyltaxuyunnanin C	C26 H38 O7	462.261	10.666	Full match	No results	No results	2.70612e+06	2.60742e+06	1.58538e+06	3.19151e+06	2.52712e+06	2.43034e+06	3.49078e+06	3.19873e+06	3.70297e+06	1.28749e+06	4.43379e+06	6.28193e+06	0.67191	-0.57366	0.220396	0.833333	0.545814
Com_2084_neg	Cefalochromin	C28 H22 O10	518.121	10.099	Full match	No results	No results	885132	959818	667085	1.03038e+06	1.01999e+06	1.05356e+06	728146	779780	812017	300045	751314	784874	1.35123	0.434277	0.0905055	0.861111	0.516267
Com_2091_neg	Marinobufagenin	C24 H32 O5	400.224	13.239	Full match	No results	No results	698817	1.15128e+06	497282	501772	512979	514817	1.50082e+06	718851	713712	1.04021e+06	852294	468018	0.732341	-0.449412	0.186977	0.722222	0.413081
Com_2096_neg	pladienolide B	C30 H48 O8	536.333	9.811	Full match	No results	No results	424848	392492	275658	424303	431964	438170	283897	374733	303390	126156	429626	307135	1.30823	0.387615	0.135691	0.777778	0.489417
Com_209_neg	D-(-)-Lyxose	C5 H10 O5	150.052	1.411	Not the top hit	Full match	Full match	2.03038e+08	2.2623e+08	3.61657e+07	3.12742e+07	3.63274e+08	2.44381e+08	1.2326e+08	1.14725e+08	9.51357e+07	2.05159e+07	2.45333e+08	1.66397e+08	1.44292	0.528992	0.681839	0.638889	0.551261
Com_2103_neg	cryptophycin 1	C35 H43 Cl N2 O8	654.273	11.228	Full match	No results	No results	4.50216e+06	3.99368e+06	1.98954e+06	4.45584e+06	3.31928e+06	4.43922e+06	5.5262e+06	5.27037e+06	1.99416e+06	845052	2.35416e+06	3.02948e+06	1.1935	0.255202	0.344534	0.583333	0.584728
Com_2106_neg	tubiferal A	C30 H42 O5	482.301	13.17	Full match	No results	No results	622349	302046	466341	323512	310075	307560	193800	238802	300043	95404.3	257943	234055	1.76651	0.820905	0.0187779	1	0.8127
Com_2116_neg	11-Deoxocucurbitacin I	C30 H44 O6	500.311	13.234	Full match	No results	No results	2.69722e+06	1.58833e+06	3.24948e+06	566015	578656	580729	372909	431921	509798	174481	453949	436265	3.89204	1.96053	0.0173199	1	1.58006
Com_2119_neg	soyasapogenol A	C30 H50 O4	474.369	14.953	Full match	No results	No results	2.04825e+06	2.86644e+06	846547	346929	2.01907e+06	3.49e+06	977523	1.91008e+06	1.16878e+06	724991	784055	2.95614e+06	1.36327	0.447075	0.646461	0.638889	0.310652
Com_2122_neg	2-(3-((Tributylstannyl)methoxy)propyl)isoindoline-1,3-dione	C24 H39 N O3 Sn	509.196	9.641	Full match	No results	No results	6.49835e+06	2.41039e+06	3.22703e+06	5.13242e+06	2.66936e+06	3.45904e+06	2.92692e+06	3.43748e+06	2.21175e+06	1.50627e+06	2.4738e+06	1.6466e+06	1.64732	0.720121	0.0423641	0.833333	0.661068
Com_2132_neg	Glutaurine	C7 H14 N2 O6 S	254.056	12.19	Full match	No results	No results	1.04531e+06	1.70878e+06	1.26006e+06	1.65857e+06	2.03013e+06	2.05469e+06	927579	1.12703e+06	1.00312e+06	425766	1.01471e+06	888073	1.81155	0.857228	0.00798412	0.972222	0.860403
Com_2134_neg	Nemonapride (JAN)	C21 H26 Cl N3 O2	387.171	9.668	Full match	No results	No results	1.10984e+06	1.55571e+06	621663	1.71428e+06	1.98609e+06	1.80643e+06	2.03477e+06	1.33335e+06	735437	482009	1.31796e+06	4.6081e+06	0.836599	-0.257392	0.957144	0.527778	0.326238
Com_2135_neg	17beta-Hydroxy-7alpha-mercaptoandrost-4-en-3-one 7-propionate	C22 H32 O3 S	376.209	11.355	Full match	No results	No results	1.33295e+06	3.14959e+06	1.31106e+06	3.2252e+06	3.94139e+06	1.82357e+06	5.03997e+06	2.72841e+06	1.94406e+06	529246	807811	2.30644e+06	1.10691	0.146532	0.520753	0.583333	0.622872
Com_2142_neg	Methylsuccinic acid	C5 H8 O4	132.044	7.521	No results	Invalid mass	No results	1.56036e+06	1.42053e+06	576176	2.16207e+06	1.5235e+06	1.06862e+06	221017	1.70399e+06	1.86071e+06	778013	3.02022e+06	5.2302e+06	0.648599	-0.6246	0.831883	0.638889	0.166134
Com_214_neg	(÷)-Abscisic acid	C15 H20 O4	264.135	8	Full match	Full match	Full match	4.93934e+06	5.67552e+06	3.26587e+07	2.36476e+07	9.21443e+06	6.09522e+07	5.72675e+06	3.62837e+06	5.9063e+06	2.16962e+06	4.44557e+06	2.54486e+07	2.89672	1.53442	0.0930333	0.777778	1.38436
Com_2153_neg	3-hexaprenyl-4,5-dihydroxybenzoic acid	C37 H54 O4	562.403	1.148	Full match	No results	No results	2.41538e+06	5.16646e+06	3.92731e+06	9.29319e+06	6.07836e+06	8.55902e+06	1.06092e+06	993364	1.17397e+06	513060	1.00437e+06	1.05383e+06	6.11081	2.61136	7.74962e-05	1	2.40802
Com_2158_neg	(3R)-3-(3,4-dimethoxyphenyl)-8-hydroxy-3,4-dihydroisochromen-1-one	C17 H16 O5	300.096	7.852	No match	No results	Invalid mass	3.02899e+06	1.8067e+06	4.02636e+06	5.32687e+06	2.98875e+06	4.09698e+06	2.63019e+06	4.28774e+06	4.98829e+06	2.35879e+06	2.3473e+06	2.20709e+06	1.13046	0.176915	0.569336	0.611111	0.217462
Com_2192_neg	adenosine 5▽-phosphoramidate	C10 H15 N6 O6 P	346.081	9.844	Full match	No results	No results	568468	600277	451846	636885	639119	651591	419485	506805	488978	200175	459549	447973	1.40636	0.491962	0.0463523	0.916667	0.549816
Com_2194_neg	5-Pentylresorcinol	C11 H16 O2	180.114	7.055	Full match	No results	No results	1.81029e+06	1.78751e+06	976128	1.44479e+06	1.07878e+06	1.96474e+06	2.13469e+06	1.77219e+06	700060	400534	1.04843e+06	2.6407e+06	1.04204	0.059416	0.554019	0.555556	0.408429
Com_2198_neg	Ro15-4513	C15 H14 N6 O3	326.114	10.138	Full match	No results	No results	1.1387e+06	1.44754e+06	1.14667e+06	1.78955e+06	2.48429e+06	1.90359e+06	1.85784e+06	1.61773e+06	2.24356e+06	1.52612e+06	2.12565e+06	1.63929e+06	0.900106	-0.151833	0.369988	0.638889	0.232856
Com_2209_neg	3,N(4)-ethenocytosine	C6 H5 N3 O	135.044	7.531	Full match	No results	No results	1.00413e+06	1.44605e+06	1.38751e+06	2.04532e+06	2.92936e+06	2.60821e+06	1.67048e+06	1.9022e+06	1.46386e+06	552834	1.35873e+06	3.84233e+06	1.0584	0.0818821	0.653507	0.555556	0.408655
Com_2229_neg	2-(4-Chlorophenyl)-N-[3-(1-piperidinyl)propyl]-4-quinolinamine	C23 H26 Cl N3	379.183	7.494	Full match	No results	No results	4.61066e+06	1.94709e+06	1.83987e+06	3.57093e+06	3.92675e+06	6.07333e+06	3.02664e+06	1.3824e+06	1.83473e+06	417170	1.52223e+06	1.25731e+06	2.32707	1.21851	0.0225943	0.944444	1.28131
Com_2262_neg	1-deoxy-D-altro-heptulose 7-phosphate	C7 H15 O9 P	274.046	7.113	Full match	No results	No results	1.06609e+06	1.2322e+06	944711	1.27833e+06	1.32495e+06	1.37724e+06	2.93219e+06	2.30889e+06	2.03224e+06	1.57216e+06	5.29724e+06	4.62165e+06	0.38496	-1.37722	0.00538967	1	1.23065
Com_2268_neg	DE1625000	C7 H6 N2 O	134.048	7.478	Full match	No results	No results	997701	1.37308e+06	1.07123e+06	1.44268e+06	1.47737e+06	1.48444e+06	891935	1.69295e+06	924767	376137	861644	1.00415e+06	1.36424	0.448092	0.112652	0.805556	0.601335
Com_228_neg	Asiatic acid 생汽꿇擧	C30 H48 O5	488.349	13.038	Full match	No results	Full match	1.15728e+08	1.26215e+08	1.57789e+08	4.36889e+07	4.54782e+07	6.71063e+07	3.26602e+07	4.12924e+07	5.29461e+07	2.42841e+07	5.44179e+07	5.52593e+07	2.13143	1.09182	0.0317058	0.833333	0.942465
Com_2290_neg	bielschowskysin	C22 H26 O9	434.157	8.618	Full match	No results	No results	889820	633815	381046	547694	459520	524815	1.11096e+06	552975	510120	251621	438666	536264	1.01062	0.0152376	0.763361	0.555556	0.24296
Com_2300_neg	Decuroside III	C26 H34 O14	570.193	10.475	Full match	No results	No results	2.68862e+06	2.40094e+06	816001	1.40402e+06	1.11322e+06	1.69721e+06	1.28605e+06	1.57013e+06	2.5794e+06	315893	1.23357e+06	2.09994e+06	1.11393	0.155655	0.591446	0.555556	0.466891
Com_2304_neg	excavatoid A	C21 H34 O9	430.219	8.18	Full match	No results	No results	1.45254e+06	2.25793e+06	2.35146e+06	3.65796e+06	3.16699e+06	3.06447e+06	1.8856e+06	1.82363e+06	1.68185e+06	774392	2.25203e+06	4.52876e+06	1.23212	0.301143	0.297484	0.722222	0.469456
Com_2315_neg	Correolide	C40 H52 O16	788.328	11.051	Full match	No results	No results	438669	490622	337229	524251	515548	522770	354630	406748	397828	169197	413381	385450	1.32994	0.411359	0.0841996	0.861111	0.474322
Com_231_neg	Phloroglucinol	C6 H6 O3	126.031	1.374	Partial match	Full match	Full match	2.46179e+08	2.63682e+08	2.83229e+08	4.76307e+08	6.67728e+08	4.86839e+08	8.04777e+07	7.45771e+07	1.00347e+08	3.44319e+07	1.19391e+08	1.2162e+08	4.56624	2.19101	0.000141586	1	2.10542
Com_2322_neg	Cucurbitacin F	C30 H46 O7	518.322	10.379	Full match	No results	No results	2.35829e+06	1.9111e+06	1.28056e+06	1.61238e+06	2.22602e+06	2.49117e+06	2.39227e+06	1.64282e+06	2.22466e+06	584315	1.6667e+06	1.27397e+06	1.21409	0.279872	0.300466	0.666667	0.466268
Com_2332_neg	Omadacycline	C29 H40 N4 O7	556.287	9.968	Full match	No results	No results	875716	1.24475e+06	648570	1.75993e+06	1.15669e+06	1.71457e+06	2.11528e+06	1.21608e+06	1.05913e+06	119960	937495	672491	1.2091	0.273935	0.372141	0.611111	0.862831
Com_233_neg	Gentiopicrin	C16 H20 O9	356.11	7.684	Full match	No results	No results	3.57289e+07	3.09477e+07	9.7945e+06	3.36672e+07	2.19933e+07	1.53083e+07	1.3276e+07	4.74994e+07	4.05786e+07	1.51137e+07	8.67064e+07	7.55542e+07	0.528973	-0.918733	0.225516	0.722222	0.740377
Com_2342_neg	MFCD00210294	C16 H22 O10	374.12	7.72	Full match	No results	No results	5.01675e+06	3.61714e+06	2.6049e+06	5.78095e+06	7.78471e+06	3.1029e+06	806815	1.21374e+06	1.53788e+06	382989	966468	1.04492e+06	4.68809	2.229	0.00013806	1	2.14723
Com_234_neg	3-(5'-methylthio)pentylmalic acid	C10 H18 O5 S	250.087	8.855	Full match	No results	No results	2.47187e+06	1.21966e+06	2.13138e+06	2.17128e+06	2.09744e+06	2.4353e+06	2.30132e+06	2.01924e+06	2.87101e+06	1.22382e+06	3.92159e+06	4.22592e+06	0.756325	-0.402922	0.333414	0.666667	0.363144
Com_2366_neg	Loxoprofen	C15 H18 O3	246.124	8.231	Full match	No results	No results	554490	616000	497932	744464	751317	746079	453013	540350	508655	199681	512939	539820	1.41962	0.505505	0.0607599	0.888889	0.575954
Com_2372_neg	2H-1,4-Benzoxazin-3(4H)-one	C8 H7 N O2	149.047	3.118	Full match	No results	No results	1.86797e+06	2.62926e+06	1.67213e+06	2.57004e+06	2.83312e+06	2.99493e+06	1.45955e+06	903225	1.55335e+06	651202	2.24344e+06	2.24854e+06	1.60801	0.685277	0.0444751	0.888889	0.761247
Com_2377_neg	3,4-Bis({[(2-methyl-2-propanyl)oxy]carbonyl}amino)benzoic acid	C17 H24 N2 O6	352.162	7.124	Full match	No results	No results	1.07899e+06	4.00815e+06	1.73516e+06	1.35733e+06	2.01062e+06	2.51817e+06	1.65045e+06	1.26483e+06	2.34291e+06	738605	1.01025e+06	1.51217e+06	1.49174	0.576992	0.169025	0.75	0.546789
Com_2385_neg	Dihydropteroic acid	C14 H14 N6 O3	314.114	10.096	Full match	No results	No results	2.01789e+06	1.96305e+06	627120	922538	1.26848e+06	1.24188e+06	1.36529e+06	1.16789e+06	975661	363636	1.30661e+06	1.08356e+06	1.28395	0.360594	0.377714	0.611111	0.424433
Com_2393_neg	Pleuromutilin	C22 H34 O5	378.239	12.209	Full match	No results	No results	1.60681e+06	593706	449033	621994	655313	663442	390495	454819	482764	176426	466325	459245	1.88896	0.917588	0.0311372	0.888889	0.827172
Com_2395_neg	Dihomo-gamma-linolenic acid	C20 H34 O2	306.254	14.612	Full match	No results	No results	3.71352e+06	5.55846e+06	2.58302e+06	4.01937e+06	7.49515e+06	6.38783e+06	1.47036e+06	1.76957e+06	3.04749e+06	703437	2.5308e+06	1.26164e+06	2.75958	1.46445	0.00312651	0.972222	1.46879
Com_2396_neg	1-Fluoro-4-{2-[4-(methylsulfonyl)phenyl]-1-cyclopenten-1-yl}benzene	C18 H17 F O2 S	316.093	8.176	Full match	No results	No results	1.01538e+06	1.35415e+06	627597	947669	970760	1.16628e+06	1.71218e+06	1.82931e+06	1.20207e+06	354393	1.45863e+06	4.29538e+06	0.560437	-0.835377	0.331325	0.805556	0.693945
Com_2406_neg	2-Butyryl-3,5-dihydroxy-4,6-dimethylphenyl alpha-D-glucopyranoside	C18 H26 O9	386.156	10.951	Full match	No results	No results	2.66424e+06	1.96374e+06	1.41196e+06	1.71128e+06	1.70681e+06	2.13631e+06	1.3154e+06	2.37951e+06	1.64463e+06	179860	869553	1.49137e+06	1.4713	0.557094	0.168526	0.805556	0.972257
Com_240_neg	Dehydrovomifoliol	C13 H18 O3	222.125	9.029	Full match	No results	No results	1.34676e+07	2.31131e+07	2.40698e+07	9.00421e+07	9.85537e+07	4.05887e+07	8.28336e+06	6.81724e+06	7.58829e+07	1.39969e+07	6.5182e+07	8.53886e+07	1.13416	0.18162	0.562956	0.361111	0.484017
Com_2410_neg	8-METHOXYKYNURENIC ACID	C11 H9 N O4	219.053	9.734	Full match	No results	No results	980640	1.57472e+06	926310	1.6997e+06	1.9776e+06	2.59252e+06	3.44732e+06	2.69011e+06	1.76809e+06	998776	1.78505e+06	3.93575e+06	0.666764	-0.584751	0.193449	0.777778	0.652988
Com_2415_neg	ribisin A	C13 H12 O5	248.067	11.127	Full match	No results	No results	698168	577582	409277	612037	599480	628139	415525	448720	748533	340300	686996	1.34671e+06	0.884092	-0.177732	0.915635	0.472222	0.108299
Com_2419_neg	briaexcavatin Q	C26 H37 Cl O11	560.201	8.65	Full match	No results	No results	2.00732e+06	2.49518e+06	1.45763e+06	3.07101e+06	3.24158e+06	3.31217e+06	2.35695e+06	3.51319e+06	2.77768e+06	1.70831e+06	2.92028e+06	2.17251e+06	1.0088	0.0126427	0.973089	0.527778	0.21117
Com_242_neg	5,5-Dimethyl-4-(3-oxobutyl)dihydro-2(3H)-furanone	C10 H16 O3	184.109	7.951	Full match	No results	No results	1.5532e+08	1.61357e+08	5.36924e+07	1.45566e+08	1.03389e+08	1.34474e+08	1.75477e+08	1.29706e+08	3.48968e+07	1.60918e+07	5.69792e+07	1.56895e+08	1.32235	0.403102	0.255273	0.611111	0.83368
Com_2435_neg	Tolciclate	C20 H21 N O S	323.136	8.911	Full match	No results	No results	760787	1.06608e+06	644150	953875	1.01488e+06	941615	1.03411e+06	721048	812377	636297	1.34697e+06	1.19775e+06	0.936128	-0.0952227	0.765555	0.444444	0.118372
Com_2436_neg	Trioxsalen	C14 H12 O3	228.079	10.188	Full match	No results	No results	221346	256944	177504	257196	272293	278082	182285	209837	267907	84024.2	359604	460601	0.935502	-0.0961874	0.83997	0.5	0.264739
Com_2438_neg	Fenipentol	C11 H16 O	164.119	12.886	Full match	No results	No results	3.0697e+06	2.52056e+06	2.27801e+06	4.83607e+06	4.2395e+06	4.95156e+06	3.46109e+06	2.51301e+06	1.79234e+06	1.23143e+06	1.95497e+06	2.35605e+06	1.64517	0.718237	0.0300848	0.861111	0.710641
Com_244_neg	2-methylcitric acid	C7 H10 O7	206.042	1.169	Full match	No results	No results	2.60361e+08	3.51237e+08	1.81952e+08	4.71051e+08	3.81028e+08	4.16151e+08	3.99623e+07	7.10853e+07	5.96067e+07	1.43725e+07	4.84185e+07	4.20895e+07	7.48283	2.90358	4.51493e-05	1	2.85944
Com_2452_neg	2,4,6-Tris[(4-methoxybenzyl)oxy]-1,3,5-cyclohexanetriol	C30 H36 O9	540.235	9.671	Full match	No results	No results	3.10408e+06	3.60204e+06	2.47855e+06	2.50728e+06	1.09841e+06	2.36013e+06	3.68385e+06	3.68545e+06	3.24613e+06	1.62435e+06	1.58409e+06	3.18264e+06	0.890864	-0.166723	0.631096	0.666667	0.241672
Com_245_neg	dihydroconiferyl alcohol glucoside	C16 H24 O8	344.146	10.379	Full match	No results	No results	1.0661e+08	2.00413e+08	3.05589e+07	6.18227e+07	9.33043e+07	5.62498e+07	2.43124e+08	1.26059e+08	1.55933e+08	1.49248e+08	4.23567e+08	2.54791e+08	0.405818	-1.3011	0.0134175	0.916667	1.36817
Com_2480_neg	Leukotriene B4	C20 H32 O4	336.229	12.889	Full match	No results	No results	3.33952e+06	1.5094e+06	1.5791e+06	4.35199e+06	2.93327e+06	4.30393e+06	3.12462e+06	2.093e+06	1.12226e+06	1.08058e+06	1.2828e+06	1.74972e+06	1.72364	0.785458	0.0648569	0.805556	0.746114
Com_2482_neg	manzamine A	C36 H44 N4 O	548.354	11.477	Full match	No results	No results	1.31342e+06	2.05457e+06	1.06846e+06	2.06424e+06	1.74389e+06	937286	2.25732e+06	2.42416e+06	852286	392471	1.11524e+06	1.34227e+06	1.0952	0.131191	0.51421	0.527778	0.481126
Com_2498_neg	Benzyl 4-O-beta-D-glucopyranosyl-beta-D-glucopyranoside	C19 H28 O11	432.161	8.682	Full match	No results	No results	1.79594e+06	1.66715e+06	1.07369e+06	851227	1.00911e+06	1.87638e+06	1.30739e+06	3.88578e+06	641117	623785	949392	1.02323e+06	0.981355	-0.0271531	0.616413	0.666667	0.318221
Com_24_neg	Catechin	C15 H14 O6	290.078	7.747	Full match	Full match	Not the top hit	1.26517e+09	2.13626e+09	3.47815e+08	1.15196e+09	2.36799e+09	1.63395e+09	4.20833e+09	3.00953e+09	4.04619e+09	3.1279e+09	7.32858e+09	7.35353e+09	0.306222	-1.70735	0.0046198	1	1.7877
Com_2503_neg	3-Aminotyrosine	C9 H12 N2 O3	196.084	2.869	Full match	No results	No results	1.98177e+06	2.61611e+06	1.83753e+06	2.14668e+06	2.41011e+06	2.55781e+06	1.34619e+06	1.33598e+06	1.77092e+06	572876	2.12894e+06	2.13012e+06	1.45934	0.545314	0.0740784	0.888889	0.650299
Com_2504_neg	Ophiopogonin B	C39 H62 O12	722.423	13.986	Full match	No results	No results	1.17473e+06	1.33329e+06	905995	2.18237e+06	1.81577e+06	1.20423e+06	715882	1.89912e+06	1.69824e+06	578847	2.26613e+06	2.62404e+06	0.880816	-0.183087	0.928729	0.583333	0.267872
Com_251_neg	Quizalofop-P-tefuryl	C22 H21 Cl N2 O5	428.112	8.512	Full match	No results	No results	1.25032e+07	2.62891e+06	1.00584e+07	7.11875e+06	1.12019e+07	1.66037e+07	2.21217e+07	2.25937e+07	1.63337e+07	7.08848e+06	1.4982e+07	1.71767e+07	0.599374	-0.738473	0.097575	0.805556	0.906594
Com_2525_neg	Astringin	C20 H22 O9	406.125	11.273	Full match	No results	No results	460662	524527	407525	586246	587188	584417	402950	434859	1.29687e+06	152098	647062	892911	0.8233	-0.28051	0.996717	0.472222	0.37217
Com_2528_neg	Sebacic acid	C10 H18 O4	202.12	12.372	Full match	No results	No results	884939	1.17033e+06	523359	819516	6.66263e+06	1.27201e+06	984888	674208	605277	355660	615585	1.05801e+06	2.63944	1.40023	0.161154	0.75	0.874994
Com_252_neg	3-Hydroxyvaline	C5 H11 N O3	133.073	1.361	Full match	No results	No results	1.381e+08	2.93544e+08	2.13143e+07	6.25109e+07	1.16039e+08	3.87356e+07	5.12867e+06	6.13723e+06	5.90838e+06	2.26935e+06	7.12923e+06	5.53608e+06	20.8741	4.38364	0.000362388	1	3.80281
Com_2530_neg	Agnuside	C22 H26 O11	466.146	8.432	Full match	No results	No results	580947	614634	313651	373268	612823	589435	1.25706e+06	1.12902e+06	2.45968e+06	507066	3.7371e+06	1.35161e+06	0.295432	-1.7591	0.0107897	0.888889	1.54155
Com_2531_neg	gaboxadol	C6 H8 N2 O2	140.058	4.239	Full match	No results	No results	2.4389e+06	3.39047e+06	2.40483e+06	3.82069e+06	3.68738e+06	3.64615e+06	1.37643e+06	1.42581e+06	1.13663e+06	551025	1.75515e+06	2.16877e+06	2.30436	1.20436	0.00391045	1	1.24316
Com_2533_neg	Makisterone A	C28 H46 O7	494.322	15.073	Full match	No results	No results	413205	375612	454818	402714	475245	427423	233761	292481	368307	103455	307543	291675	1.59591	0.674375	0.0334274	1	0.758402
Com_2536_neg	aspeverin	C22 H24 N4 O2	376.192	9.632	Full match	No results	No results	989845	1.19366e+06	966480	5.7976e+06	980950	1.63004e+06	499752	1.17053e+06	581030	109962	184492	213434	4.18911	2.06664	0.00943513	0.916667	2.06875
Com_2537_neg	Ethanal tetramer	C8 H16 O4	176.104	8.269	Full match	No results	No results	1.04019e+06	760819	776819	1.23875e+06	1.49048e+06	1.11122e+06	3.30034e+06	1.92024e+06	642802	255080	903187	945646	0.805579	-0.311902	0.881817	0.555556	0.54148
Com_254_neg	L-Proline	C5 H9 N O2	115.063	1.435	Full match	No results	No results	1.18209e+08	2.92027e+08	1.55362e+08	2.36661e+08	1.88448e+08	2.22144e+08	8.07068e+07	8.15843e+07	5.77723e+07	2.44778e+07	5.43316e+07	2.37376e+07	3.75949	1.91054	0.000701358	1	1.93312
Com_2560_neg	2,9-Dihydroxy-1-methoxydibenzo[cd,f]indol-4(5H)-one	C16 H11 N O4	281.068	11.81	Full match	No results	No results	696898	887101	650594	848794	1.17384e+06	796540	1.32672e+06	751492	1.40638e+06	924447	659775	624016	0.887742	-0.171787	0.620282	0.555556	0.152749
Com_2569_neg	picrasin B	C21 H28 O6	376.188	13.276	Full match	No results	No results	294982	358778	293430	379359	411435	388570	254000	292684	298373	117676	296903	278752	1.38233	0.467097	0.0612858	0.888889	0.534872
Com_2572_neg	Diethyl diallylmalonate	C13 H20 O4	240.135	11.569	Full match	No results	No results	3.60712e+06	3.43097e+06	2.78603e+06	4.29255e+06	3.61041e+06	3.25064e+06	1.40891e+06	2.08877e+06	1.29404e+06	899681	2.84369e+06	2.39571e+06	1.91914	0.940459	0.00822172	0.972222	0.991447
Com_2579_neg	Rhodojaponin IV	C24 H38 O8	454.256	10.987	Full match	No results	No results	1.63225e+06	2.08121e+06	808337	1.40682e+06	1.55126e+06	1.94725e+06	1.41578e+06	1.25345e+06	1.04445e+06	649377	1.63813e+06	1.38778e+06	1.27584	0.351448	0.237872	0.75	0.365767
Com_2582_neg	Iristectorigenin B 臍棺뼝計菉羹	C17 H14 O7	330.068	8.003	No results	No results	Invalid mass	161221	180834	138012	198452	211710	203702	130412	160673	154372	56053	146762	153235	1.36484	0.448737	0.0887585	0.888889	0.54003
Com_2598_neg	kinamycin D	C22 H18 N2 O9	454.101	9.209	Full match	No results	No results	1.16115e+06	1.3339e+06	709847	1.50962e+06	1.97096e+06	1.52831e+06	2.11171e+06	3.49704e+06	2.72826e+06	849665	1.93806e+06	2.38794e+06	0.607859	-0.718191	0.0902803	0.833333	0.787549
Com_262_neg	Cefepime	C19 H24 N6 O5 S2	480.125	6.603	Full match	No results	No results	541789	650879	480010	698837	728459	766310	538757	582159	570803	278498	631078	598743	1.2082	0.272859	0.188601	0.75	0.342575
Com_2634_neg	Salicylate	C7 H5 O3	137.024	4.418	Full match	No results	No results	2.85359e+06	3.48755e+06	2.8757e+06	5.04318e+06	5.51914e+06	5.262e+06	641579	961972	926918	255123	787584	559487	6.05933	2.59916	4.00952e-05	1	2.54972
Com_2657_neg	(.+/-.)-Tartaric acid	C4 H6 O6	150.016	14.812	Full match	No results	No results	551532	573033	469000	830904	848577	1.10517e+06	410042	476374	470740	204170	489027	407564	1.78127	0.832906	0.0131072	0.916667	0.807482
Com_2674_neg	Droxidopa	C9 H11 N O5	213.063	7.575	Full match	No results	No results	650766	661081	94501.1	1.36126e+06	546264	399311	222337	563277	1.1878e+06	512922	2.23614e+06	3.06652e+06	0.476721	-1.06878	0.275175	0.638889	0.880184
Com_2680_neg	2-amino-2,3,7-trideoxy-D-lyxo-hept-6-ulosonic acid	C7 H13 N O5	191.08	8.246	Full match	No results	No results	108452	119455	93537	226435	148950	138426	87077.9	98758.9	94690.5	39587	100117	104871	1.59065	0.669616	0.0390821	0.888889	0.674645
Com_2683_neg	GANODERONE A	C30 H46 O3	454.343	14.126	Full match	No results	No results	1.75752e+06	2.16243e+06	1.54491e+06	1.94887e+06	1.64824e+06	1.94904e+06	2.02861e+06	3.11723e+06	1.642e+06	961063	819255	1.33661e+06	1.11169	0.152752	0.369253	0.666667	0.354508
Com_2689_neg	Limaprost	C22 H36 O5	380.255	13.284	Full match	No results	No results	589774	1.4501e+06	451931	601943	633678	598462	391202	450781	459544	181241	457280	429325	1.82575	0.868491	0.0272782	0.944444	0.797988
Com_2717_neg	Deoxycholic acid	C24 H40 O4	392.291	12.223	Full match	No results	No results	496539	603458	456409	653616	666077	674339	396909	464742	490693	188882	473984	481751	1.4219	0.507823	0.0524581	0.888889	0.569137
Com_2721_neg	DL-Ornithine	C5 H12 N2 O2	132.09	4.619	Full match	No results	No results	2.14458e+06	2.63593e+06	441403	2.898e+06	3.23145e+06	2.3567e+06	1.7441e+06	1.95154e+06	1.87993e+06	96568.7	2.08455e+06	2.22417e+06	1.37344	0.45779	0.425742	0.833333	1.03362
Com_2723_neg	cinnamtannin A2	C60 H50 O24	1154.27	6.039	Full match	No results	No results	179434	193704	161440	221100	231430	215248	1.80872e+06	1.50829e+06	430299	768794	2.95125e+06	2.59486e+06	0.119492	-3.06501	0.001174	1	2.71318
Com_2740_neg	Methylsulfonylmethane	C2 H6 O2 S	94.0084	15.014	Full match	No results	No results	438389	865295	642524	1.00984e+06	1.10156e+06	1.08328e+06	468948	522933	559457	264487	528045	693094	1.69277	0.759388	0.0272425	0.833333	0.729981
Com_2747_neg	5,6-Dioxo-1,3-cyclohexadiene-1-carboxylic acid	C7 H4 O4	152.01	7.773	Full match	No results	No results	1.38405e+06	1.1936e+06	844419	1.49062e+06	1.61696e+06	1.30702e+06	621040	928892	709390	458212	851032	941557	1.73757	0.797072	0.00364118	0.916667	0.778456
Com_2775_neg	pelitinib	C24 H23 Cl F N5 O2	467.154	8.39	Full match	No results	No results	274865	316008	250886	368374	336366	347675	228041	275160	248791	119457	442208	416039	1.09509	0.13105	0.440552	0.611111	0.295988
Com_2779_neg	Metildigoxin	C42 H66 O14	794.445	14.027	Full match	No results	No results	1.44004e+06	1.06445e+06	578072	1.68157e+06	1.32361e+06	810531	311892	437883	925963	139078	465632	1.56101e+06	1.79574	0.84458	0.071592	0.805556	1.1259
Com_2785_neg	(+)-Ingenol	C20 H28 O5	348.192	10.578	Full match	No results	No results	1.252e+06	1.34762e+06	797098	1.23954e+06	733319	768891	519909	862432	750003	332484	852258	1.3807e+06	1.30667	0.385898	0.192351	0.638889	0.464073
Com_2807_neg	acetylglutamate	C7 H9 N O5	187.049	8.107	Invalid mass	No results	No results	258260	183914	145687	202546	299662	210466	125220	156617	313450	94095.3	759526	1.0251e+06	0.52568	-0.927744	0.539622	0.527778	0.42337
Com_2816_neg	3-deoxy-D-manno-2-octulosonic acid	C8 H14 O8	238.068	13.191	Full match	No results	No results	400773	521593	671882	852869	793284	550741	653874	328532	507367	360156	715220	377194	1.28848	0.365667	0.164163	0.777778	0.370702
Com_2817_neg	3,5-Di-t-butylcatechol	C14 H22 O2	222.161	12.156	Full match	No results	No results	2.84465e+06	654542	429786	554737	632692	550883	478454	382550	595945	154950	463717	568409	2.14343	1.09992	0.119388	0.777778	0.820095
Com_2819_neg	(+)-7-deoxy-trans-dihydronarciclasine	C14 H15 N O6	293.089	10.742	Full match	No results	No results	303051	578442	252423	416239	393412	368938	228526	255616	270215	106887	329656	2.59816e+06	0.610311	-0.712383	0.829033	0.722222	0.256045
Com_2837_neg	Methyl 4-[2-(3-bromophenyl)-2-cyclobutylethyl]benzoate	C20 H21 Br O2	372.072	14.438	Full match	No results	No results	1.69182e+06	3.03256e+06	1.46285e+06	2.54031e+06	2.53795e+06	2.42038e+06	1.67303e+06	2.29033e+06	1.56548e+06	664146	2.6192e+06	1.81195e+06	1.28819	0.365342	0.217734	0.694444	0.493386
Com_2839_neg	2-((4-Nitrophenoxy)methyl)oxirane	C9 H9 N O4	195.052	1.894	Full match	No results	No results	1.48205e+06	1.8656e+06	976523	2.05008e+06	2.40487e+06	2.78383e+06	995692	1.18452e+06	1.17098e+06	376448	1.3176e+06	1.5159e+06	1.76234	0.817492	0.0439122	0.833333	0.858449
Com_2857_neg	loliolide	C11 H16 O3	196.109	8.713	Full match	No results	No results	880289	1.35018e+06	744624	1.33756e+06	1.46219e+06	1.28637e+06	760374	794337	1.18702e+06	293348	837249	1.90739e+06	1.22172	0.288917	0.291921	0.694444	0.515688
Com_2874_neg	(2R)-1-(beta-D-Galactopyranosyloxy)-3-hydroxy-2-propanyl palmitate	C25 H48 O9	492.328	14.79	Full match	No results	No results	724164	991407	473381	912029	802600	787791	682650	679587	957135	194872	815821	693773	1.1659	0.221438	0.396595	0.666667	0.465146
Com_2912_neg	phomopsin A	C36 H45 Cl N6 O12	788.282	10.512	Full match	No results	No results	579158	878408	169802	242339	255399	254265	710809	558926	831137	765685	2.40192e+06	1.9973e+06	0.327477	-1.61054	0.00943708	0.861111	1.56528
Com_291_neg	2-Acetyl-3,5-dihydroxy-4-methylphenyl D-allopyranoside	C15 H20 O9	344.109	7.972	Full match	No results	No results	4.82682e+07	3.04868e+07	1.74449e+07	1.17416e+08	1.06616e+07	7.88482e+06	1.07889e+07	5.89207e+06	5.81001e+07	2.71034e+07	1.11012e+08	1.25741e+08	0.685579	-0.544606	0.673827	0.583333	0.475123
Com_2922_neg	(4-Aminophenyl)(7-benzyl-3,7-diazabicyclo[3.3.1]non-3-yl)methanone	C21 H25 N3 O	335.201	10.731	Full match	No results	No results	1.07749e+06	947481	959321	1.81784e+06	1.48537e+06	1.17482e+06	1.65958e+06	1.27122e+06	872396	373262	899368	621170	1.30987	0.389425	0.187751	0.75	0.566845
Com_2927_neg	Artemether	C16 H26 O5	298.177	10.369	Full match	No results	No results	568111	393102	529882	503762	541603	622145	938865	972954	672878	346797	864708	1.28974e+06	0.621047	-0.687227	0.0784716	0.833333	0.650798
Com_292_neg	Acetophenone	C8 H8 O	120.057	2.077	Full match	No results	No results	2.87593e+07	2.10369e+07	2.24375e+07	2.81587e+07	1.53666e+08	2.56518e+07	2.54001e+07	3.72221e+07	2.84062e+07	1.18075e+07	2.66215e+07	2.11391e+07	1.85735	0.893245	0.335094	0.583333	0.562788
Com_2935_neg	Cyanolide A Aglycon	C26 H44 O8	484.302	12.89	Full match	No results	No results	628326	795450	390071	532782	791949	494963	1.95695e+06	2.37678e+06	421720	152701	410932	358704	0.639958	-0.643952	0.977118	0.611111	0.626227
Com_2954_neg	Gly-l-pro	C7 H12 N2 O3	172.084	4.839	Full match	No results	No results	1.14248e+06	1.02836e+06	773010	1.23392e+06	1.88945e+06	1.39321e+06	576073	553504	764827	290285	911893	1.00969e+06	1.81684	0.861428	0.0191575	0.944444	0.885076
Com_2967_neg	Baliospermin	C32 H50 O8	562.349	12.92	Full match	No results	No results	1.00855e+06	973201	1.33829e+06	457130	474905	473197	274730	326259	328633	133113	422918	330098	2.60238	1.37983	0.00502801	1	1.2675
Com_2969_neg	ambruticin	C28 H42 O6	474.296	11.328	Full match	No results	No results	2.44133e+06	819350	553732	624633	636978	646618	386597	466651	453410	174066	447695	428066	2.42847	1.28005	0.0202987	1	1.06914
Com_2989_neg	1-O-acetyl-alpha-maltose	C14 H24 O12	384.125	5.162	Full match	No results	No results	339653	493927	210473	480971	522029	345895	317954	542591	381633	112709	214405	228217	1.33126	0.412792	0.21114	0.666667	0.597216
Com_2993_neg	Ablukast	C28 H34 O8	498.228	14.776	Full match	No results	No results	1.5156e+06	1.9495e+06	1.87791e+06	2.13577e+06	2.96863e+06	1.53147e+06	1.41122e+06	810143	1.1322e+06	245401	1.98395e+06	1.07016e+06	1.8005	0.848398	0.0563045	0.888889	1.04247
Com_299_neg	Succinic anhydride	C4 H4 O3	100.016	1.485	Full match	No results	No results	1.07313e+07	9.77177e+07	7.52607e+07	1.11501e+08	2.32871e+08	1.0804e+08	6.44933e+07	6.65059e+07	8.89129e+07	3.09898e+07	6.02688e+07	1.68581e+08	1.32594	0.407018	0.837688	0.694444	0.423229
Com_29_neg	Ethyl myristate	C16 H32 O2	256.239	14.619	Partial match	Full match	No results	3.93748e+09	6.23293e+09	4.19014e+09	6.03645e+09	8.10943e+09	8.05065e+09	2.8422e+09	3.275e+09	3.48923e+09	1.09934e+09	3.45456e+09	3.25382e+09	2.09928	1.06989	0.00739703	1	1.0815
Com_3002_neg	cholic acid	C24 H40 O5	408.286	12.601	Full match	No results	No results	279215	564243	278685	370258	382894	516532	230888	294165	294641	117911	286185	429999	1.44627	0.532338	0.0943572	0.722222	0.583747
Com_3010_neg	Motesanib	C22 H23 N5 O	373.192	11.217	Full match	No results	No results	543639	422244	698401	1.23774e+06	963460	1.42207e+06	291597	401907	270174	268590	273318	277544	2.96532	1.56819	0.00255937	1	1.39058
Com_3031_neg	Vernodalol	C20 H24 O8	392.146	7.999	Full match	No results	No results	954361	811762	362395	823316	715187	757626	564694	1.05902e+06	681154	263592	516173	589632	1.20423	0.268108	0.357437	0.722222	0.407097
Com_3033_neg	Picrocrocin	C16 H26 O7	330.167	11.57	Full match	No results	No results	671031	1.50377e+06	782136	1.29761e+06	1.47139e+06	1.50858e+06	560425	600600	509493	189048	478956	488809	2.55878	1.35546	0.00206622	1	1.32544
Com_3045_neg	Prednicarbate	C27 H36 O8	488.241	11.491	Full match	No results	No results	918071	1.07964e+06	849174	788469	1.51485e+06	718204	1.2018e+06	945424	733766	350025	555318	1.23773e+06	1.16806	0.224116	0.376926	0.583333	0.378541
Com_3049_neg	7-Methyl-3-methyleneoctyl 4-methylbenzenesulfonate	C17 H26 O3 S	310.162	8.186	Full match	No results	No results	372761	353168	250433	330737	503204	383032	258924	316857	267261	152017	332339	281678	1.3631	0.446895	0.0574726	0.833333	0.458588
Com_3062_neg	3-Mercaptopropane-1,2-diol	C3 H8 O2 S	108.024	13.806	Full match	No results	No results	392499	834174	191070	836841	894306	615525	468367	761263	474021	234623	551533	587132	1.22343	0.290929	0.659451	0.666667	0.365072
Com_3076_neg	Methyldopa	C10 H13 N O4	211.084	6.422	Full match	No results	No results	509651	1.2944e+06	684081	1.17636e+06	1.28515e+06	1.63558e+06	409552	518679	667987	218130	661966	731395	2.05294	1.03769	0.0200973	0.861111	1.00847
Com_308_neg	18-┑-Glycyrrhetinic acid	C30 H46 O4	470.338	13.646	Full match	Full match	No results	7.14753e+07	6.09907e+07	3.55713e+07	1.05022e+07	3.85356e+07	9.11933e+06	1.08055e+07	1.1695e+07	6.37966e+06	2.99622e+06	1.05685e+07	7.47509e+06	4.53114	2.17988	0.0122598	0.833333	1.84253
Com_3091_neg	Pyridine	C5 H5 N	79.0418	6.641	Full match	No results	No results	1.12554e+06	1.57546e+06	667476	1.2642e+06	1.80517e+06	1.30376e+06	910781	679231	801597	316621	1.0786e+06	793960	1.69002	0.757039	0.0368405	0.861111	0.772713
Com_3092_neg	Phenprocoumon	C18 H16 O3	280.11	8.642	Full match	No results	No results	212202	98880.7	72436.3	234972	270463	353589	164953	215364	186272	31820.2	177261	82718.2	1.44753	0.533592	0.330902	0.722222	0.739702
Com_3097_neg	methyl eugenol	C11 H14 O2	178.099	7.638	Full match	No results	No results	387897	573180	257061	562663	628654	422088	411825	420934	460915	183697	575135	767333	1.00415	0.00597554	0.851729	0.5	0.262113
Com_3098_neg	Aspulvinone E	C17 H12 O5	296.068	15.101	Full match	No results	No results	535406	611555	444155	633023	1.44813e+06	1.32111e+06	309507	414193	440142	168773	513766	412146	2.2109	1.14463	0.0171572	0.972222	1.0425
Com_3116_neg	acrovestone	C32 H42 O8	554.29	13.45	Full match	No results	No results	254832	283676	226590	315518	342850	305754	188897	216551	231717	88400.3	238539	208656	1.47449	0.560212	0.0376897	0.944444	0.616754
Com_3119_neg	THREO-SPHINGOSINE, (-)-	C18 H37 N O2	299.281	14.893	Full match	No results	No results	606650	947744	530810	330074	585209	320349	212340	263961	406989	92674.7	316234	243895	2.16187	1.11228	0.0144532	0.944444	1.09734
Com_3155_neg	Nostocyclopeptide A3	C41 H56 N8 O9	804.414	12.272	Full match	No results	No results	328707	380002	296846	429618	411672	600377	414082	878266	447771	149999	1.20258e+06	1.89932e+06	0.490228	-1.02848	0.294281	0.75	0.765883
Com_3165_neg	4-Methoxyaniline	C7 H9 N O	123.068	3.411	Full match	No results	No results	548093	968039	764604	969144	814456	757308	433654	529243	765611	216409	1.01556e+06	998495	1.2179	0.284399	0.275324	0.583333	0.469617
Com_3170_neg	(2S,3S)-2-hydroxytridecane-1,2,3-tricarboxylic acid	C16 H28 O7	332.183	8.133	Full match	No results	No results	301474	317736	240867	724286	412430	392422	504606	258366	230738	350193	282142	315223	1.23075	0.299538	0.379136	0.666667	0.243929
Com_3173_neg	TMPTMA	C18 H26 O6	338.174	9.281	Full match	No results	No results	541146	892440	175310	359442	592352	422281	649063	548464	617008	466397	1.14669e+06	755367	0.713119	-0.487785	0.152355	0.777778	0.585392
Com_3199_neg	Pivagabine	C9 H17 N O3	187.12	7.902	Full match	No results	No results	619197	740067	597524	959325	766669	636996	338998	545464	773742	160335	430268	417690	1.62002	0.696011	0.0450196	0.861111	0.823336
Com_3204_neg	NS1800000	C8 H9 N O4	183.052	2.159	Full match	No results	No results	865664	1.23983e+06	1.27058e+06	1.53801e+06	1.76961e+06	1.07366e+06	742149	699100	1.01273e+06	279886	1.38665e+06	1.17741e+06	1.46422	0.550137	0.109914	0.805556	0.680126
Com_3213_neg	millettone	C22 H18 O6	378.11	7.608	Full match	No results	No results	217858	239280	180289	278208	270435	269274	261742	219976	271876	99573	322691	307777	0.980931	-0.0277761	0.861764	0.611111	0.261443
Com_3225_neg	Ethyl 1H-imidazol-2-ylacetate	C7 H10 N2 O2	154.073	7.879	Invalid mass	No results	No results	747944	777266	540029	1.31778e+06	1.17811e+06	1.1233e+06	560193	616283	823096	249554	805589	607567	1.55215	0.634272	0.0707949	0.75	0.674865
Com_3226_neg	4-(4-{[3-(1-Piperidinyl)propyl]amino}-2-quinolinyl)benzoic acid	C24 H27 N3 O2	389.211	9.746	Full match	No results	No results	631157	399391	262466	677129	507366	591575	1.6172e+06	819482	885593	231348	728150	597299	0.629031	-0.668798	0.260114	0.777778	0.702726
Com_3241_neg	mephenesin	C10 H14 O3	182.094	10.934	Full match	No results	No results	1.01583e+06	985710	565420	1.16159e+06	897119	785499	560175	656213	682449	273483	677045	864259	1.45711	0.543114	0.0649809	0.861111	0.583004
Com_3244_neg	Setileuton	C22 H17 F4 N3 O4	463.118	6.977	Full match	No results	No results	508086	366930	113829	310467	1.12554e+06	330933	238875	389268	129445	153966	487013	473377	1.47215	0.557926	0.467234	0.583333	0.422619
Com_3278_neg	1-Bromo-3,7-dimethyloctane	C10 H21 Br	220.084	8.834	Full match	No results	No results	684823	979230	810261	1.36218e+06	2.02388e+06	831732	775004	606169	1.40124e+06	401294	1.0621e+06	803974	1.32523	0.406239	0.265889	0.694444	0.439691
Com_328_neg	13-KODE	C18 H30 O3	294.218	13.082	Full match	No results	No results	5.16402e+07	4.18792e+07	2.47701e+07	4.72616e+07	5.00889e+07	5.24957e+07	2.37532e+07	2.43505e+07	4.01653e+07	1.19828e+07	6.32182e+07	5.14685e+07	1.2475	0.31904	0.265993	0.694444	0.48986
Com_331_neg	1-(3-((2',4'-Dimethyl-[4,5'-bithiazol]-2-yl)amino)phenyl)ethanone	C16 H15 N3 O S2	329.065	8.047	Full match	No results	No results	1.17874e+06	1.33992e+06	983116	1.48377e+06	1.50114e+06	1.46384e+06	940107	1.12483e+06	1.08072e+06	430830	1.05283e+06	1.09448e+06	1.38903	0.474074	0.0646899	0.888889	0.541974
Com_3328_neg	hexamidine	C20 H26 N4 O2	354.204	13.801	Full match	No results	No results	597018	1.17895e+06	694298	1.00876e+06	1.07427e+06	646497	482995	932685	804098	361609	921383	1.05172e+06	1.14169	0.191165	0.455347	0.361111	0.291768
Com_3339_neg	(1beta,3beta,5beta,25S)-3-Hydroxyspirostan-1-yl beta-D-ribopyranoside	C32 H52 O8	564.365	13.058	Full match	No results	No results	359563	325351	1.16164e+06	445640	351098	436088	217474	260275	266334	98365.8	262648	261822	2.25279	1.17171	0.0139034	1	1.03945
Com_3343_neg	Vinorelbine	C45 H54 N4 O8	778.395	1.138	Full match	No results	No results	198041	279468	225268	308784	349800	308465	301366	291966	344774	132464	271825	298951	1.01735	0.0248166	0.814423	0.444444	0.270396
Com_334_neg	1,1'-(5-Phenyl-3-cyclopentene-1,3-diyl)bis(4-chlorobenzene)	C23 H18 Cl2	364.078	7.983	Full match	No results	No results	638346	1.02218e+06	1.44727e+06	785262	1.616e+06	1.22251e+06	500567	620276	592533	239481	571630	621723	2.13958	1.09733	0.00487155	1	1.0518
Com_3358_neg	Betamipron	C10 H11 N O3	193.073	11.257	Full match	No results	No results	568680	756826	561611	885559	716066	725179	594069	534517	660347	222007	604547	847540	1.21683	0.28313	0.245657	0.694444	0.424368
Com_3360_neg	Benalfocin	C11 H14 Cl N	195.081	4.258	Full match	No results	No results	502713	715847	555857	801951	601605	798164	540990	657572	614703	252310	617118	600593	1.21102	0.276227	0.226837	0.666667	0.378512
Com_338_neg	Robustaol A	C25 H30 O9	474.188	8.729	Full match	No results	No results	8.41703e+07	6.48605e+07	4.40004e+07	7.62214e+07	5.3286e+07	5.71173e+07	4.94245e+07	7.01726e+07	4.13955e+07	8.4853e+07	4.56871e+07	4.10211e+07	1.14164	0.191105	0.366855	0.666667	0.253007
Com_3393_neg	Pyrrolo[1,2-a]pyrazine-3,6(4H,7H)-dione	C7 H6 N2 O2	150.042	7.122	Full match	No results	No results	1.13559e+06	1.13395e+06	1.22336e+06	1.64141e+06	1.74215e+06	1.44099e+06	554086	673970	935162	351953	692106	170333	2.46252	1.30014	0.00829183	1	1.40451
Com_339_neg	Benfotiamine	C19 H23 N4 O6 P S	466.11	7.57	Full match	No results	No results	1.74031e+07	1.17453e+07	4.53264e+06	7.24213e+06	2.61203e+07	9.99504e+06	1.53308e+07	2.05488e+07	9.67535e+06	6.90566e+06	1.48089e+07	1.81871e+07	0.901493	-0.149612	0.536994	0.583333	0.385552
Com_3419_neg	N-(3-Carboxypropanoyl)-5-hydroxynorvaline	C9 H15 N O6	233.089	13.969	Full match	No results	No results	1.45016e+06	1.89171e+06	1.1126e+06	2.00226e+06	2.43439e+06	2.02654e+06	771656	1.00451e+06	936321	478395	1.00653e+06	1.05797e+06	2.07742	1.05479	0.00143156	1	1.01602
Com_3423_neg	L787257	C17 H13 Cl N2 O2 S	344.039	11.232	Full match	No results	No results	395649	437903	319222	490506	467888	518814	349385	373968	325467	124770	325819	318946	1.44635	0.532418	0.0593033	0.888889	0.615978
Com_345_neg	Maslinic acid	C30 H48 O4	472.354	14.235	Full match	No results	No results	7.93392e+07	9.71835e+07	1.93459e+07	3.22769e+07	1.03866e+08	2.77226e+07	4.65372e+07	3.2864e+07	3.89386e+07	1.26502e+07	1.77842e+07	2.74836e+07	2.04095	1.02924	0.126209	0.722222	0.856486
Com_3463_neg	3-(Trifluoromethyl)phenylalanine	C10 H10 F3 N O2	233.065	14.567	Full match	No results	No results	72688.1	79426.7	61345.9	92595.6	96927.3	113667	47263.7	79521.9	53181.6	56454.7	118302	99284.4	1.13798	0.18647	0.37013	0.611111	0.231711
Com_3470_neg	N-(6-Oxo-6H-benzo(c)chromen-2-yl)methanesulfonamide	C14 H11 N O4 S	289.04	12.046	Full match	No results	No results	712531	896595	1.56903e+06	1.84642e+06	2.31356e+06	1.9878e+06	457636	536141	650464	218116	535871	200843	3.58818	1.84325	0.00103792	1	1.7801
Com_3472_neg	Premithramycin A1	C27 H28 O12	544.156	11.176	Full match	No results	No results	381667	444749	329852	486168	481302	488811	329014	358225	1.17313e+06	130542	334868	311872	0.990484	-0.0137943	0.515529	0.777778	0.444802
Com_3482_neg	(4E,5Z)-3-Hydroxy-4,5-bis(hydroxyimino)-2-pyrrolidinone	C4 H5 N3 O4	159.029	3.313	Full match	No results	No results	651671	1.00627e+06	879661	1.44281e+06	899650	1.37597e+06	663316	747549	694106	263225	1.48154e+06	923114	1.31075	0.390397	0.215689	0.666667	0.540766
Com_34_neg	Alpha-Linolenic acid	C18 H30 O2	278.224	14.172	Full match	No results	No results	3.25693e+08	4.76217e+08	1.97368e+08	1.48772e+08	4.89128e+08	3.47221e+08	2.48616e+08	3.45388e+08	8.51719e+08	1.81391e+08	1.01529e+09	1.4877e+09	0.480471	-1.05748	0.21112	0.666667	0.806477
Com_3509_neg	N-{[1-Cyclohexyl-2-(3-furyl)-1H-benzimidazol-5-yl]carbonyl}tryptophan	C29 H28 N4 O4	496.21	11.879	Full match	No results	No results	472908	474591	337546	536966	474283	535253	1.10718e+06	848926	483567	183231	489864	544891	0.774142	-0.36933	0.643239	0.722222	0.472571
Com_3533_neg	Rebimastat	C23 H41 N5 O5 S	499.284	11.74	Full match	No results	No results	1.47102e+06	1.23089e+06	839358	450765	428790	443026	475381	435737	379022	142691	362194	329303	2.28959	1.19509	0.025402	0.888889	1.05376
Com_3562_neg	L-(-)-Threonine	C4 H9 N O3	119.058	10.075	Full match	No results	No results	954090	1.06602e+06	615256	1.47934e+06	1.02533e+06	997884	638692	489257	938999	155990	779378	933846	1.55936	0.640958	0.107458	0.888889	0.82367
Com_3565_neg	4-Nitro-o-anisidine	C7 H8 N2 O3	168.053	7.276	Full match	No results	No results	776499	739423	475472	2.19177e+06	971918	867484	504245	486797	424508	194692	597919	534888	2.19557	1.1346	0.021345	0.888889	1.01391
Com_3579_neg	5,6,7-Trifluorotryptophan	C11 H9 F3 N2 O2	258.062	9.42	Full match	No results	No results	437935	576336	337725	509698	565208	529954	599946	812774	464692	225373	621546	495265	0.918393	-0.122816	0.877369	0.611111	0.316491
Com_3593_neg	Azelnidipine	C33 H34 N4 O6	582.245	11.603	Full match	No results	No results	404566	494177	378877	547582	648186	542136	485107	377866	487959	232275	414135	611809	1.15575	0.208828	0.313369	0.694444	0.292852
Com_3599_neg	(+)-ainsliadimer A	C30 H34 O7	506.231	9.636	Full match	No results	No results	742470	443165	220183	503083	349582	510400	305202	567076	399254	150112	404836	435967	1.22384	0.29142	0.42094	0.666667	0.371555
Com_35_neg	(2R)-2,3-Dihydroxypropanoic acid	C3 H6 O4	106.026	1.384	Invalid mass	Invalid mass	No results	3.62964e+08	5.49713e+08	3.72026e+08	8.41145e+08	8.72965e+08	5.58436e+08	2.18037e+08	2.50853e+08	2.99496e+08	1.01278e+08	4.2725e+08	5.54418e+08	1.92145	0.942197	0.0338024	0.861111	1.01472
Com_3633_neg	3-(6-hydroxyindol-3-yl)lactic acid	C11 H11 N O4	221.068	2.312	Full match	No results	No results	525865	574336	689190	1.16115e+06	733632	1.04294e+06	387537	671641	846408	274571	667823	567242	1.38413	0.468979	0.136305	0.75	0.518925
Com_363_neg	altersolanol A	C16 H16 O8	336.083	7.008	Full match	No results	No results	1.78569e+07	2.27071e+07	8.76082e+06	2.08328e+07	3.64016e+07	2.41749e+07	2.09252e+08	1.21667e+08	7.57e+07	6.41581e+07	1.98254e+08	1.63836e+08	0.156969	-2.67145	6.48724e-05	1	2.60199
Com_3655_neg	1-Palmitoyl lysophosphatidic acid	C19 H39 O7 P	410.244	13.218	Full match	No results	No results	191784	226593	170666	233842	239065	239922	154063	175923	170452	70396.1	394745	264157	1.05866	0.0822382	0.49036	0.638889	0.32332
Com_365_neg	Chaksine	C22 H38 N6 O4	450.296	14.166	Full match	No results	No results	1.32386e+07	8.5926e+06	3.11293e+07	2.25168e+06	3.95413e+06	2.78323e+06	2.7166e+06	2.914e+06	4.04071e+06	1.00445e+06	3.10591e+06	2.75639e+06	3.74588	1.9053	0.0729568	0.75	1.32823
Com_3690_neg	MFCD00010043	C16 H10 S	234.051	8.241	Full match	No results	No results	909059	1.03989e+06	546130	964077	785829	712604	276018	318147	353448	121664	343386	327186	2.84944	1.51068	0.000489331	1	1.49295
Com_3735_neg	Propylparaben	C10 H12 O3	180.079	11.283	Full match	No results	No results	201877	235116	184881	269645	270079	257697	164723	198651	183974	69958.1	182325	253458	1.34774	0.430547	0.110725	0.888889	0.538113
Com_375_neg	taxifolin	C15 H12 O7	304.057	8.714	Partial match	No results	Full match	1.99234e+08	2.94189e+08	4.5981e+07	5.25944e+07	1.81239e+08	1.04847e+08	1.41805e+07	2.11956e+07	1.03168e+07	4.25404e+06	1.71557e+07	2.93139e+07	9.10719	3.18701	0.000411426	1	2.97061
Com_3765_neg	3,4,5-Trimethoxyphenylacetic acid	C11 H14 O5	226.083	5.099	Full match	No results	No results	824334	783850	599702	1.09246e+06	1.50993e+06	888037	731337	912134	679755	286243	784653	873113	1.33536	0.417234	0.188335	0.694444	0.49953
Com_377_neg	Dithizone	C13 H12 N4 S	256.078	1.578	Full match	No results	No results	8.74348e+06	8.67163e+06	9.2949e+06	1.24248e+07	1.46155e+07	1.08576e+07	3.02129e+06	7.39693e+06	1.19477e+07	2.37843e+06	2.26829e+07	3.62973e+07	0.771673	-0.373939	0.731748	0.555556	0.327727
Com_3787_neg	2,3,6-Pyridinetriol	C5 H5 N O3	127.026	15.062	Full match	No results	No results	396366	446040	469645	1.89152e+06	694021	575469	311081	198643	185416	90803.5	208461	280158	3.50949	1.81126	0.00319414	1	1.59895
Com_3788_neg	1-(beta-D-Ribofuranosyl)-1,2-dihydropyrimidine	C9 H14 N2 O4	214.094	7.183	Full match	No results	No results	560196	846990	333647	676662	866858	695761	297740	360757	487519	148738	539940	434017	1.75435	0.810936	0.0343313	0.888889	0.839067
Com_378_neg	MFCD00035791	C12 H22 O3	214.156	10.875	Full match	No results	No results	5.26436e+07	3.68604e+07	6.38964e+07	1.58623e+08	8.59336e+07	1.50704e+08	1.91896e+08	1.23982e+08	5.37516e+07	5.10566e+07	5.28951e+06	1.55746e+07	1.24258	0.313337	0.315094	0.638889	0.919185
Com_37_neg	Malondialdehyde	C3 H4 O2	72.0209	1.299	Full match	No results	No results	7.33404e+08	1.37716e+09	1.14651e+09	8.67455e+08	2.27469e+09	1.33722e+09	2.64956e+08	8.33521e+08	1.36319e+09	1.39627e+08	3.38687e+08	4.62874e+08	2.27351	1.18492	0.027128	0.861111	1.44277
Com_3812_neg	Athamantin	C24 H30 O7	430.197	10.905	Full match	No results	No results	35388.4	44210.1	29171.4	46189.4	46223.3	46063.3	29530.5	36040.6	32145.6	13135.7	31909.8	31404.1	1.4196	0.50548	0.0569831	0.833333	0.567735
Com_3813_neg	4-Cyano-DL-Phenylalanine	C10 H10 N2 O2	190.074	4.552	Full match	No results	No results	521693	456805	520752	517415	953541	591886	337082	411399	524556	146568	399803	694649	1.41687	0.502707	0.124777	0.75	0.618703
Com_382_neg	2-(3-CARBOXYPROPIONYL)-6-HYDROXY-CYCLOHEXA-2,4-DIENE CARBOXYLIC ACID	C11 H12 O6	240.063	8.326	Full match	No results	No results	1.67376e+06	1.00047e+06	1.05371e+06	1.52275e+06	1.34683e+06	1.95695e+06	887443	909689	1.16867e+06	628294	1.55239e+06	995634	1.39275	0.47794	0.0641268	0.833333	0.474373
Com_3835_neg	Aniline	C6 H7 N	93.0574	5.019	Full match	No results	No results	549562	741820	661267	783434	756084	754266	575480	709396	548508	147749	670910	544916	1.32827	0.409551	0.174072	0.861111	0.625392
Com_384_neg	2-C-methylerythritol 4-phosphate	C5 H13 O7 P	216.039	1.899	Full match	No results	No results	8.54372e+06	1.20696e+07	8.66591e+06	1.41541e+07	1.57576e+07	1.05642e+07	1.02079e+07	1.13032e+07	3.40138e+07	6.19843e+06	6.97149e+07	7.45198e+07	0.338686	-1.56198	0.180542	0.638889	1.0092
Com_3865_neg	stellettin L	C30 H42 O4	466.307	14.268	Full match	No results	No results	284382	355651	265421	382191	380323	388106	233408	287591	274240	103424	287019	265350	1.41697	0.502812	0.0632629	0.861111	0.579619
Com_3887_neg	2-oxosuccinamic acid	C4 H5 N O4	131.021	12.368	Full match	No results	No results	421829	452957	368626	560349	577488	478306	336888	424092	419135	196193	412577	356864	1.33266	0.414309	0.0580091	0.888889	0.452444
Com_38_neg	Pyruvic acid	C3 H4 O3	88.0158	1.579	Full match	No results	No results	3.3017e+08	4.19516e+08	3.2836e+08	5.18486e+08	5.54032e+08	4.97929e+08	2.39253e+08	2.34025e+08	3.75223e+08	1.06187e+08	5.28811e+08	4.58805e+08	1.36358	0.447402	0.155195	0.722222	0.607433
Com_3906_neg	taurolithocholic acid sulfate	C26 H45 N O8 S2	563.259	11.907	Full match	No results	No results	222531	800146	207757	406397	318480	291568	825603	267149	209065	120540	215032	660274	0.977897	-0.0322449	0.799293	0.583333	0.329128
Com_390_neg	Diosmin	C28 H32 O15	608.173	9.433	Full match	No results	No results	2.02709e+06	975424	747034	2.34015e+06	1.02617e+06	1.18113e+06	984743	773000	4.84399e+06	1.37232e+06	4.98486e+06	5.23722e+06	0.455976	-1.13297	0.199702	0.694444	0.796639
Com_3929_neg	4-Hydroxy-2-oxoglutaric acid	C5 H6 O6	162.016	2.705	Full match	No results	No results	502869	563289	443327	669439	748014	902563	431544	423910	553643	269826	567127	757095	1.27516	0.350682	0.175345	0.722222	0.388492
Com_3937_neg	3'-Hydroxycotinine, Cis-	C10 H12 N2 O2	192.089	5.866	Full match	No results	No results	1.16671e+06	467307	884756	602854	547039	538259	376451	445095	431032	163835	424668	435699	1.84775	0.88577	0.0173849	1	0.845841
Com_3943_neg	DC2810000	C9 H12 O3	168.078	3.624	Full match	No results	No results	748652	758004	502597	783929	829710	1.04641e+06	565363	510390	795205	250687	520699	1.06891e+06	1.25815	0.3313	0.217432	0.638889	0.462456
Com_3944_neg	musk ambrette	C12 H16 N2 O5	268.105	3.394	Full match	No results	No results	469981	736674	502806	1.21552e+06	842663	611437	529847	598431	537076	227301	757067	761012	1.28391	0.360545	0.282422	0.611111	0.435746
Com_3951_neg	AM9627000	C8 H7 N O3	165.042	13.6	Full match	No results	No results	874413	1.1829e+06	599475	988417	1.26993e+06	1.21188e+06	543921	722154	631744	315668	484664	616480	1.84847	0.886335	0.00405503	0.916667	0.859273
Com_396_neg	Coumarone	C8 H6 O	118.041	7.364	Full match	No results	No results	7.63334e+06	7.95943e+06	2.34972e+06	7.62714e+06	5.02918e+06	4.20721e+06	3.45533e+06	2.20882e+07	1.80427e+07	4.73597e+06	3.62365e+07	2.09525e+07	0.32988	-1.59999	0.0745632	0.75	1.29454
Com_3976_neg	(+)-Flesinoxan	C22 H26 F N3 O4	415.191	14.788	Full match	No results	No results	128990	152921	129905	64922.6	216404	122764	31808.3	61167.7	36744.6	56195.1	73122.2	123597	2.13234	1.09244	0.0114075	0.916667	1.12636
Com_3995_neg	enniatin B4	C34 H59 N3 O9	653.427	14.954	Full match	No results	No results	807329	955087	635329	1.28381e+06	686115	810625	318003	276424	321567	89535.3	237872	303141	3.3483	1.74343	0.000669308	1	1.74134
Com_400_neg	Bruceine A 綺델綾羹A	C26 H34 O11	522.208	9.882	Not the top hit	No results	Full match	1.27542e+07	1.20035e+07	7.87876e+06	1.22608e+07	1.21931e+07	1.40724e+07	1.24416e+07	1.64632e+07	1.39635e+07	5.89522e+06	1.11272e+07	1.12805e+07	0.999883	-0.000169102	0.859537	0.527778	0.260468
Com_4010_neg	4-[2-(4,4,5,5-Tetramethyl-1,3,2-dioxaborolan-2-yl)ethyl]phenyl acetate	C16 H23 B O4	290.169	7.678	Full match	No results	No results	80244.8	111538	69938.7	98754.2	104611	97750.6	242341	236781	170712	419597	236361	555777	0.302346	-1.72573	0.00078658	1	1.55319
Com_4039_neg	N(4)-phosphoagmatine	C5 H15 N4 O3 P	210.088	14.891	Full match	No results	No results	122161	1.42677e+06	111347	158690	170783	158362	123104	188936	123405	58909.7	120945	122491	2.91154	1.54178	0.209446	0.666667	0.821318
Com_405_neg	Hex-2-ulofuranosyl hexopyranosyl-(1->6)hexopyranoside	C18 H32 O16	504.167	1.395	Full match	No results	No results	1.87171e+07	2.02797e+07	1.64857e+07	3.36326e+07	4.36542e+07	2.63729e+07	1.48295e+07	1.67856e+07	1.58629e+07	5.90999e+06	1.92417e+07	1.99473e+07	1.71903	0.781592	0.0454036	0.861111	0.79225
Com_40_neg	Epicatechin 깊랏꿱羹	C15 H14 O6	290.078	7.64	Full match	No results	Full match	4.6217e+08	3.74552e+08	9.33341e+07	2.78654e+08	4.96224e+08	2.09763e+08	2.01152e+09	1.21653e+09	1.39484e+09	9.1162e+08	2.94619e+09	3005434768	0.166697	-2.5847	0.00026152	1	2.56802
Com_4107_neg	(5-Chloro-1-pentyn-1-yl)(triethyl)silane	C11 H21 Cl Si	216.11	8.831	Full match	No results	No results	414219	564061	354986	701102	577503	604306	552414	381880	366606	142126	359455	428367	1.44168	0.527755	0.0923297	0.805556	0.62836
Com_4139_neg	L-Lombricine	C6 H15 N4 O6 P	270.073	3.224	Full match	No results	No results	425718	586087	461518	643109	588247	600792	407635	437258	519882	177585	505847	512746	1.29072	0.368175	0.142866	0.805556	0.471396
Com_415_neg	aldioxa	C4 H7 Al N4 O5	218.024	5.858	Full match	No results	No results	6.29078e+06	5.75486e+06	6.60589e+06	4.40036e+06	1.28504e+07	4.34762e+06	8.90284e+07	8.82719e+07	5.74442e+07	2.64374e+07	4.49171e+07	4.22855e+07	0.115533	-3.11362	7.76718e-06	1	3.03798
Com_41_neg	Diosmetin-7-O-┑-D-glucopyranoside 窮秊컁羹-7-O-┑-D-팥境鎌宓	C22 H22 O11	462.115	7.832	Partial match	No results	Full match	2.10319e+07	1.12406e+06	7.71785e+06	1.34391e+07	2.29805e+07	2.32452e+07	6.87242e+06	2.27068e+07	1.31025e+07	7.82782e+06	1.4587e+07	1.96972e+07	1.05596	0.0785532	0.698622	0.583333	0.375818
Com_4220_neg	Bambuterol	C18 H29 N3 O5	367.209	14.818	Full match	No results	No results	505817	288296	202649	285458	806050	146897	321951	200901	290803	119588	146977	178236	1.77612	0.828729	0.148728	0.694444	0.661552
Com_4234_neg	Diethoxymethylsilane	C5 H14 O2 Si	134.077	2.781	Full match	No results	No results	419093	811046	543877	902816	1.02654e+06	1.09859e+06	467242	369419	384970	131021	431359	317373	2.28514	1.19229	0.0067407	0.944444	1.18633
Com_4242_neg	2-Oxotetrahydrofuran-3,4-diyl diacetate	C8 H10 O6	202.047	10.385	Full match	No results	No results	688246	934137	574279	977960	936762	1.04931e+06	435326	622618	482144	156528	695072	532148	1.76504	0.819702	0.0322352	0.916667	0.917482
Com_4257_neg	(1S)-1-Carboxy-2-(1H-imidazol-4-yl)-N,N,N-trimethylethanaminium	C9 H16 N3 O2	198.125	13.846	Full match	No results	No results	565557	499586	654822	669255	589933	631263	253150	489957	609058	190846	928196	529682	1.20311	0.266774	0.251853	0.722222	0.454955
Com_4259_neg	Phosphoarginine	C6 H15 N4 O5 P	254.078	2.371	Full match	No results	No results	706286	697642	513392	859257	661280	764423	356146	462586	431629	161651	430382	375312	1.89488	0.922105	0.00616777	1	0.949678
Com_4264_neg	2-(1-Cyclohexen-1-yl)ethyl 4-methylbenzenesulfonate	C15 H20 O3 S	280.112	8.658	Full match	No results	No results	180006	193686	135517	197535	209231	203085	600874	935590	238364	301055	473060	357455	0.385033	-1.37695	0.00684334	1	1.23542
Com_426_neg	DL-Arginine	C6 H14 N4 O2	174.111	1.3	Full match	No results	No results	4.26762e+06	5.31472e+07	1.50036e+07	1.62011e+07	7.53941e+07	3.29656e+07	4.62538e+06	4.38985e+06	5.58781e+06	1.85433e+06	8.59787e+06	1.16001e+07	5.37383	2.42595	0.0177601	0.861111	2.02574
Com_429_neg	Phthalic acid	C8 H6 O4	166.026	10.678	Full match	No results	No results	2.3261e+07	1.7501e+07	1.14317e+07	1.95561e+07	1.36418e+07	1.69273e+07	1.12446e+07	1.53583e+07	7.01554e+06	5.49906e+06	5.36023e+06	9.42417e+06	1.89824	0.924664	0.00833106	0.944444	0.952967
Com_4310_neg	metharbital	C9 H14 N2 O3	198.1	5.642	Full match	No results	No results	699642	469038	374603	977296	686896	817637	385652	393315	512661	200178	395644	403398	1.75704	0.813147	0.0181691	0.833333	0.771921
Com_4363_neg	10-Bromo-1-decanol	C10 H21 Br O	236.079	10.124	Full match	No results	No results	430772	629425	341700	617643	458642	777403	422488	367102	329196	149260	304408	317337	1.72272	0.78469	0.0170481	0.944444	0.786738
Com_436_neg	Talampicillin	C24 H23 N3 O6 S	481.129	6.59	Full match	No results	No results	1.04979e+06	1.19776e+06	896113	1.3305e+06	1.36693e+06	1.41018e+06	1.02097e+06	1.0779e+06	1.0504e+06	512496	1.16132e+06	1.10182e+06	1.22386	0.291441	0.162731	0.75	0.358201
Com_438_neg	MFCD00004231	C8 H8 O5	184.036	7.942	Full match	No results	No results	1.36539e+07	1.37105e+07	6.551e+06	1.60293e+07	1.35564e+07	1.49134e+07	5.51446e+06	7.96828e+06	7.87829e+06	2.96996e+06	7.46478e+06	7.99714e+06	1.97056	0.978608	0.00797074	0.888889	0.969177
Com_4397_neg	(+)-gliodaclin C	C22 H16 N4 O3	384.124	6.08	Full match	No results	No results	292072	602148	233710	523928	275959	360354	437035	869883	284224	181412	678755	566756	0.758158	-0.399429	0.477988	0.638889	0.444138
Com_4438_neg	5-Formyluracil	C5 H4 N2 O3	140.023	0.738	Full match	No results	No results	267105	537207	376396	578720	630604	425966	389351	222395	360925	206350	701276	449945	1.20846	0.273167	0.326906	0.666667	0.341124
Com_443_neg	bungeiside C	C19 H26 O11	430.146	8.726	Partial match	No results	Full match	2.32353e+07	1.82579e+07	1.25778e+07	3.88474e+07	3.24789e+07	1.61626e+07	8.13932e+06	4.07282e+07	2.90472e+07	1.04786e+07	3.74885e+07	3.45326e+07	0.882463	-0.180392	0.930084	0.555556	0.242995
Com_445_neg	Lactobionic acid	C12 H22 O12	358.11	1.384	Full match	No results	No results	7.30001e+06	7.98116e+06	6.7401e+06	1.03204e+07	1.10206e+07	1.01732e+07	5.58753e+06	6.89562e+06	6.47485e+06	2.65012e+06	6.3817e+06	5.93638e+06	1.578	0.658094	0.0208353	0.972222	0.692322
Com_446_neg	2-Hydroxy-3-[5-(methylsulfanyl)pentyl]succinate	C10 H16 O5 S	248.071	9.022	Full match	No results	No results	3.87672e+06	5.17916e+06	3.84007e+06	4.64808e+06	5.00444e+06	5.18324e+06	1.83272e+06	4.74737e+06	2.26839e+06	890480	1.90165e+06	2.17798e+06	2.00684	1.00493	0.0128024	0.916667	1.13308
Com_4471_neg	PB2100000	C3 H8 O3 S	124.019	11.781	Full match	No results	No results	331971	338624	310855	364933	350089	346003	216565	258927	261905	104070	246199	261040	1.5144	0.598745	0.0261981	1	0.651318
Com_4480_neg	3-Phenylpropanoic acid	C9 H10 O2	150.067	6.106	Full match	No results	No results	332168	689950	443160	636847	612181	838519	583343	454111	556110	175487	554126	624482	1.2053	0.269397	0.38352	0.694444	0.431758
Com_4496_neg	Juniperic acid	C16 H32 O3	272.235	14.887	Full match	No results	No results	622008	804447	775891	858786	986300	1.00587e+06	501868	662224	781099	269732	496703	697294	1.48238	0.567911	0.039499	0.888889	0.629541
Com_4514_neg	1-(Difluoromethyl)-4-(ethylsulfanyl)benzene	C9 H10 F2 S	188.046	8.147	Full match	No results	No results	275912	330529	254397	356753	370502	462083	226995	404711	269642	109608	273830	365558	1.24227	0.312982	0.228834	0.694444	0.461729
[truncated: 180 more rows]

## Sheet: A9vsC9
ID	Name_des	Formula	Molecular Weight	RT [min]	ChemSpider_Results	mzCloud_Results	mzVault_Results	neg_A91	neg_A92	neg_A93	neg_A94	neg_A95	neg_A96	neg_C91	neg_C92	neg_C93	neg_C94	neg_C95	neg_C96	FC	log2FC	Pvalue	ROC	VIP
[truncated: 575 more rows]

## Sheet: A12vsC12
ID	Name_des	Formula	Molecular Weight	RT [min]	ChemSpider_Results	mzCloud_Results	mzVault_Results	neg_A121	neg_A122	neg_A123	neg_A124	neg_A125	neg_A126	neg_C121	neg_C122	neg_C123	neg_C124	neg_C125	neg_C126	FC	log2FC	Pvalue	ROC	VIP
[truncated: 575 more rows]

[truncated: 1 more sheets: A15vsC15]
